# Supplementary material
Source: PubMed Central journal article supplement (PMC4832822)

## Supporting Information

### **Investigating the Influence of (Deoxy)fluorination on the Lipophilicity of Non-UV-Active Fluorinated Alkanols and Carbohydrates by a New $\log P$ Determination Method**

*Bruno Linciau,\* Zhong Wang, Guillaume Compain, Vincent Paumelle, Clement Q. Fontenelle, Neil Wells, and Alex Weymouth-Wilson*

anie\_201509460\_sm\_miscellaneous\_information.pdf

---

# SUPPORTING INFORMATION

---

## Table of Contents

|      |                                                                                            |    |
|------|--------------------------------------------------------------------------------------------|----|
| 1.   | Lipophilicity maps organized by fluorine substitution .....                                | 5  |
| 1.1. | Polyfluorination in alfa position of the alcohol group (Figure SI1).....                   | 5  |
| 1.2. | Omega-trifluoromethylation (Figure SI2) .....                                              | 5  |
| 1.3. | Extending polyfluorination: from omega tri- to pentafluorination (Figure SI3).....         | 6  |
| 1.4. | Geminal difluorination (Figure SI4) .....                                                  | 6  |
| 1.5. | Monofluorination 1 (Figure SI5) .....                                                      | 7  |
| 1.6. | Monofluorination 2: diastereomers (Figure SI6).....                                        | 7  |
| 1.7. | Adding fluorines: mono- to <i>gem</i> -difluorination 1 (Figure SI7) .....                 | 8  |
| 1.8. | Adding fluorines: mono- to <i>gem</i> -difluorination 2 (Figure SI8).....                  | 8  |
| 1.9. | Adding fluorines (3): di to trifluorination; tetra to pentafluorination (Figure SI9) ..... | 9  |
| 2.   | Optimisation of the NMR method.....                                                        | 10 |
| 2.1. | Importance of H-decoupling Influence of proton-decoupling (NOE)(Table SI1).....            | 10 |
| 2.2. | Influence from SW (Table SI2) .....                                                        | 11 |
| 2.3. | Influence from O1P (Table SI3).....                                                        | 11 |
| 2.4. | Influence from D1 (Table SI4).....                                                         | 12 |
| 2.5. | Importance of S/N ratio.....                                                               | 12 |
| 3.   | T1 measurements.....                                                                       | 16 |
| 3.1. | Protocol .....                                                                             | 16 |
| 3.2. | Results (Table SI5).....                                                                   | 17 |
| 4.   | Influence of Intermolecular interactions (Table SI6).....                                  | 18 |
| 5.   | Detailed log <i>P</i> determination protocol.....                                          | 19 |
| 6.   | Reproducibility of the method .....                                                        | 20 |
| 6.1. | Multiple acquisitions (Table SI7) .....                                                    | 20 |

| Linclau | Supporting Information                                                                                                                                  | SI2 |
|---------|---------------------------------------------------------------------------------------------------------------------------------------------------------|-----|
| 6.2.    | Multiple reprocessing (Table SI8) .....                                                                                                                 | 20  |
| 7.      | Validation of the method. ....                                                                                                                          | 21  |
| 7.1.    | Internal validation (Tables SI9,10) .....                                                                                                               | 21  |
| 7.2.    | Comparison between literature $\log P$ , and the $\log P$ measured (Table SI12) .....                                                                   | 23  |
| 8.      | Detailed experimental data for the $\log P$ determinations ( $\rho_{\text{oct}}$ and $\rho_{\text{wat}}$ values for each experiment) (Table SI13) ..... | 24  |
| 8.1.    | Ethanol series .....                                                                                                                                    | 24  |
| 8.2.    | 2-Propanol series .....                                                                                                                                 | 24  |
| 8.3.    | 1-Propanol series .....                                                                                                                                 | 25  |
| 8.4.    | <i>tert</i> -Butanol series .....                                                                                                                       | 26  |
| 8.5.    | 2-Butanol series .....                                                                                                                                  | 26  |
| 8.6.    | 1-Butanol series .....                                                                                                                                  | 27  |
| 8.7.    | 2-Pentanol series .....                                                                                                                                 | 28  |
| 8.8.    | Neopentyl alcohol series .....                                                                                                                          | 28  |
| 8.9.    | 1-Pentanol series .....                                                                                                                                 | 29  |
| 8.10.   | 2-methyl-2-pentanol series .....                                                                                                                        | 29  |
| 8.11.   | 3-Heptanol series .....                                                                                                                                 | 30  |
| 8.12.   | 1,4-Butanediol series .....                                                                                                                             | 30  |
| 8.13.   | Additional compound: <i>o</i> -fluorophenol .....                                                                                                       | 30  |
| 8.14.   | 4- <i>tert</i> -butylcyclohexanol series <sup>[a]</sup> .....                                                                                           | 31  |
| 8.15.   | Fluorinated carbohydrates .....                                                                                                                         | 32  |
| 9.      | Comparison of $\text{clog} P$ with experimental $\log P$ (Table SI14) .....                                                                             | 34  |
| 10.     | Literature $\log P$ values for non-fluorinated alcohols (Table SI15) .....                                                                              | 38  |
| 11.     | List of commercially available and known compounds .....                                                                                                | 39  |
| 11.1.   | Commercially available compounds .....                                                                                                                  | 39  |
| 11.2.   | References to other compounds .....                                                                                                                     | 39  |
| 12.     | Synthesis of novel compounds .....                                                                                                                      | 39  |
| 12.1.   | Synthesis of 3-fluorobutan-1-ol (22) .....                                                                                                              | 39  |
| 12.1.1. | Synthesis of 3-fluorobut-1-yl benzoate (SI6) and 4-fluorobut-2-yl benzoate (SI7) .                                                                      | 39  |
| 12.1.2. | Synthesis of 1- <i>tert</i> -butyldimethylsilyloxy-3-fluorobutane (SI8) .....                                                                           | 40  |
| 12.1.3. | Synthesis of 3-fluorobutan-1-ol (22) .....                                                                                                              | 40  |
| 12.2.   | Synthesis of 1,1,1-trifluoropentan-2-ol (29) .....                                                                                                      | 41  |
| 12.3.   | Synthesis of 5-fluoro-1-pentanol (30) .....                                                                                                             | 41  |
| 12.3.1. | Synthesis of 5-hydroxypentyl acetate (SI9) .....                                                                                                        | 41  |
| 12.3.2. | Synthesis of 5-fluoropentyl acetate (SI10) .....                                                                                                        | 41  |
| 12.3.3. | Synthesis of 5-fluoro-1-pentanol (30) .....                                                                                                             | 42  |
| 12.4.   | Synthesis of 4-fluoropentan-1-ol (31) .....                                                                                                             | 42  |

| Linclau | Supporting Information                                                                                                                | SI3 |
|---------|---------------------------------------------------------------------------------------------------------------------------------------|-----|
| 12.4.1. | Synthesis of 4-oxopentyl benzoate (SI11) .....                                                                                        | 42  |
| 12.4.2. | Synthesis of 4-hydroxypentyl benzoate (SI12) .....                                                                                    | 43  |
| 12.4.3. | Synthesis of 4-fluoropentyl benzoate (SI13) .....                                                                                     | 43  |
| 12.4.4. | Synthesis of 4-fluoropentan-1-ol (31) .....                                                                                           | 43  |
| 12.5.   | Synthesis of 4,4-difluoropentan-1-ol (32) .....                                                                                       | 44  |
| 12.5.1. | Synthesis of 4,4-difluoropentyl benzoate (SI14) .....                                                                                 | 44  |
| 12.5.2. | Synthesis of 4,4-difluoropentan-1-ol (32) .....                                                                                       | 44  |
| 12.6.   | Synthesis of 2-fluoropentan-1-ol (33) .....                                                                                           | 45  |
| 12.6.1. | Synthesis of 2-hydroxypentyl tosylate (SI15) .....                                                                                    | 45  |
| 12.6.2. | Synthesis of 2-fluoropentyl tosylate (SI16) .....                                                                                     | 45  |
| 12.6.3. | Synthesis of 2-fluoropentan-1-ol (33) .....                                                                                           | 45  |
| 12.7.   | Synthesis of 4,4,5,5-tetrafluoropentan-1-ol (34) .....                                                                                | 46  |
| 13.     | Selected NMR spectra for logP determination, with detailed NMR parameter information and integration details after reprocessing ..... | 48  |
| 14.     | NMR spectra for fluorinated carbohydrates .....                                                                                       | 56  |
| 14.1.   | 3-Fluoro-3-deoxy-D-galactose (46), Entry 1, octanol sample .....                                                                      | 56  |
| 14.2.   | 3-Fluoro-3-deoxy-D-galactose <sup>44</sup> (46), Entry 1, water sample .....                                                          | 57  |
| 14.3.   | 2-Fluoro-2-deoxy-D-galactose (47), Entry 1, octanol sample .....                                                                      | 58  |
| 14.4.   | 2-Fluoro-2-deoxy-D-galactose (47), Entry 1, water sample .....                                                                        | 59  |
| 14.5.   | 6-Fluoro-6-deoxy-D-glucose (48), Entry 1, octanol sample .....                                                                        | 60  |
| 14.6.   | 6-Fluoro-6-deoxy-D-glucose (48), Entry 1, water sample .....                                                                          | 62  |
| 14.7.   | 6-Fluoro-6-deoxy-D-glucose (48), Entry 2, octanol sample .....                                                                        | 64  |
| 14.8.   | 6-Fluoro-6-deoxy-D-glucose (48), Entry 2, water sample .....                                                                          | 66  |
| 14.9.   | 2-Fluoro-2-deoxy-D-glucose (49), Entry 1, octanol sample .....                                                                        | 68  |
| 14.10.  | 2-Fluoro-2-deoxy-D-glucose (49), Entry 1, water sample .....                                                                          | 69  |
| 14.11.  | 2-Fluoro-2-deoxy-D-mannose (50), Entry 1, octanol sample .....                                                                        | 70  |
| 14.12.  | 2-Fluoro-2-deoxy-D-mannose (50), Entry 1, water sample .....                                                                          | 71  |
| 14.13.  | 2,3-Dideoxy-3-fluoro-D-glucofuranose (51), Entry 1, octanol sample .....                                                              | 72  |
| 14.14.  | 2,3-Dideoxy-3-fluoro-D-glucofuranose (51), Entry 1, water sample .....                                                                | 74  |
| 14.15.  | 2,3-Dideoxy-2,3-difluoro-D-glucofuranose (52), Entry 1, octanol sample .....                                                          | 76  |
| 14.16.  | 2,3-Dideoxy-2,3-difluoro-D-glucofuranose (52), Entry 1, water sample .....                                                            | 78  |
| 14.17.  | 2,3-Dideoxy-2,2,3,3-tetrafluoro-D- <i>threo</i> -hexopyranose (53), Entry 1, octanol sample .....                                     | 80  |
| 14.18.  | 2,3-Dideoxy-2,2,3,3-tetrafluoro-D- <i>threo</i> -hexopyranose (53), Entry 1, water sample .....                                       | 82  |
| 14.19.  | 2,3-Dideoxy-2,2,3,3-tetrafluoro-D- <i>erythro</i> -hexopyranose (54), Entry 1, octanol sample .....                                   | 84  |
| 14.20.  | 2,3-Dideoxy-2,2,3,3-tetrafluoro-D- <i>erythro</i> -hexopyranose (54), Entry 1, water sample .....                                     | 86  |
| 14.21.  | 2,3,4-Trideoxy-2,3,4-trifluoro-D-glucose (55), Entry 1, octanol sample .....                                                          | 88  |
| 14.22.  | 2,3,4-Trideoxy-2,3,4-trifluoro-D-glucose (55), Entry 1, water sample .....                                                            | 90  |



---

|         |                                                                                        |     |
|---------|----------------------------------------------------------------------------------------|-----|
| 15.     | NMR spectra for novel compounds.....                                                   | 92  |
| 15.1.   | Synthesis of 3-fluorobutan-1-ol (22) .....                                             | 92  |
| 15.1.1. | Synthesis of 3-fluorobut-1-yl benzoate (SI6) and 4-fluorobut-2-yl benzoate (SI7) ..... | 92  |
| 15.1.2. | Synthesis of 1-tert-butyldimethylsilyloxy-3-fluorobutane (SI8) .....                   | 94  |
| 15.1.3. | Synthesis of 3-fluorobutan-1-ol (22) .....                                             | 97  |
| 15.2.   | Synthesis of 5-fluoro-1-pentanol (30) .....                                            | 100 |
| 15.3.   | Synthesis of 4-fluoropentan-1-ol (31) .....                                            | 103 |
| 15.3.1. | Synthesis of 4-fluoropentyl benzoate (SI13) .....                                      | 103 |
| 15.3.2. | Synthesis of 4-fluoropentan-1-ol (31) .....                                            | 106 |
| 15.4.   | Synthesis of 4,4-difluoropentan-1-ol (32) .....                                        | 109 |
| 15.4.1. | Synthesis of 4,4-difluoropentyl benzoate (SI14) .....                                  | 109 |
| 15.4.2. | Synthesis of 4,4-difluoropentan-1-ol (32) .....                                        | 112 |
| 15.5.   | Synthesis of 2-fluoropentyl tosylate (SI16) .....                                      | 115 |
| 15.6.   | Synthesis of 4,4,5,5-tetrafluoropentan-1-ol (34) .....                                 | 118 |

# 1. Lipophilicity maps organized by fluorine substitution

## 1.1. Polyfluorination in alfa position of the alcohol group (Figure S11)

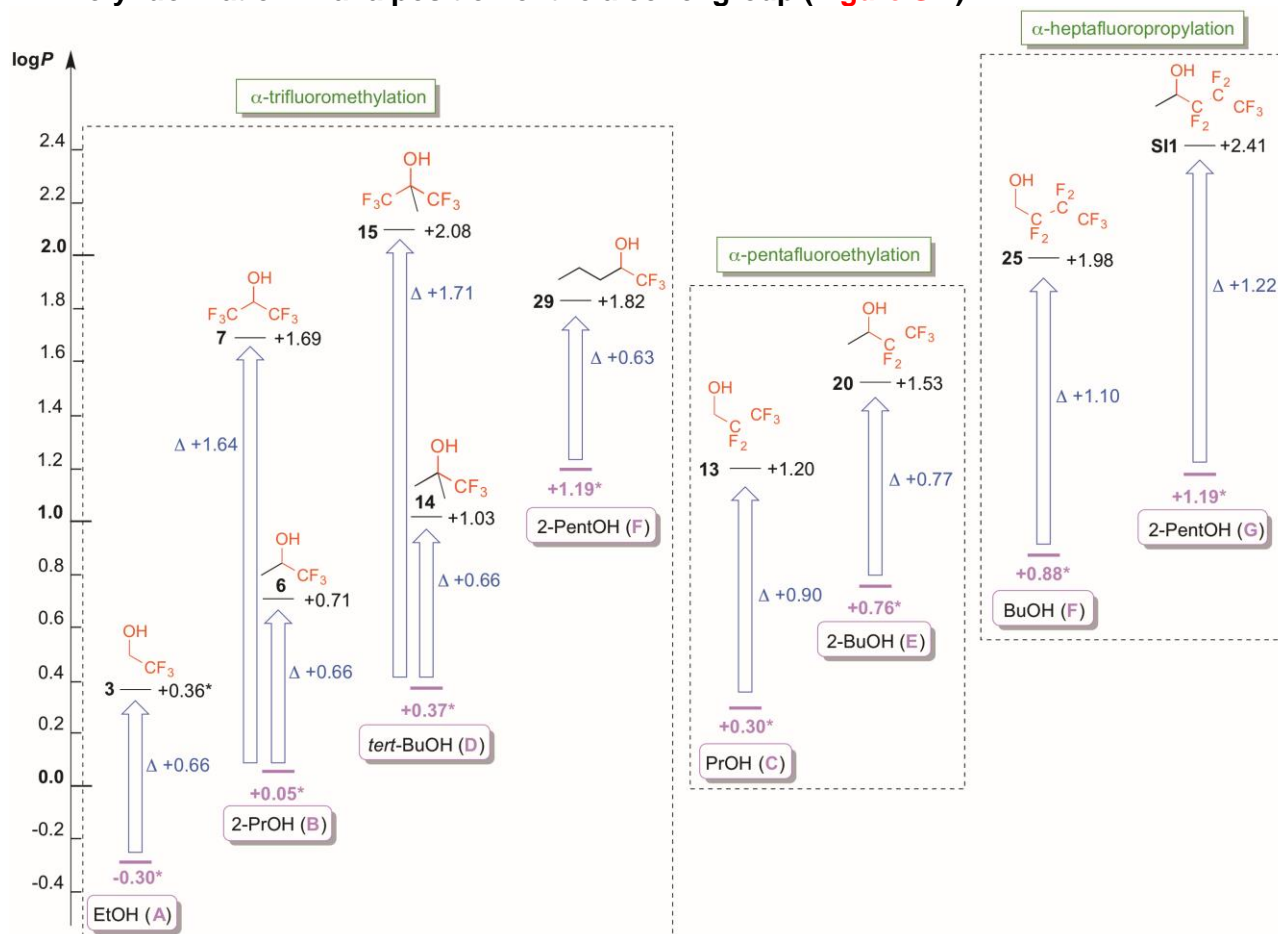

## 1.2. Omega-trifluoromethylation (Figure S12)

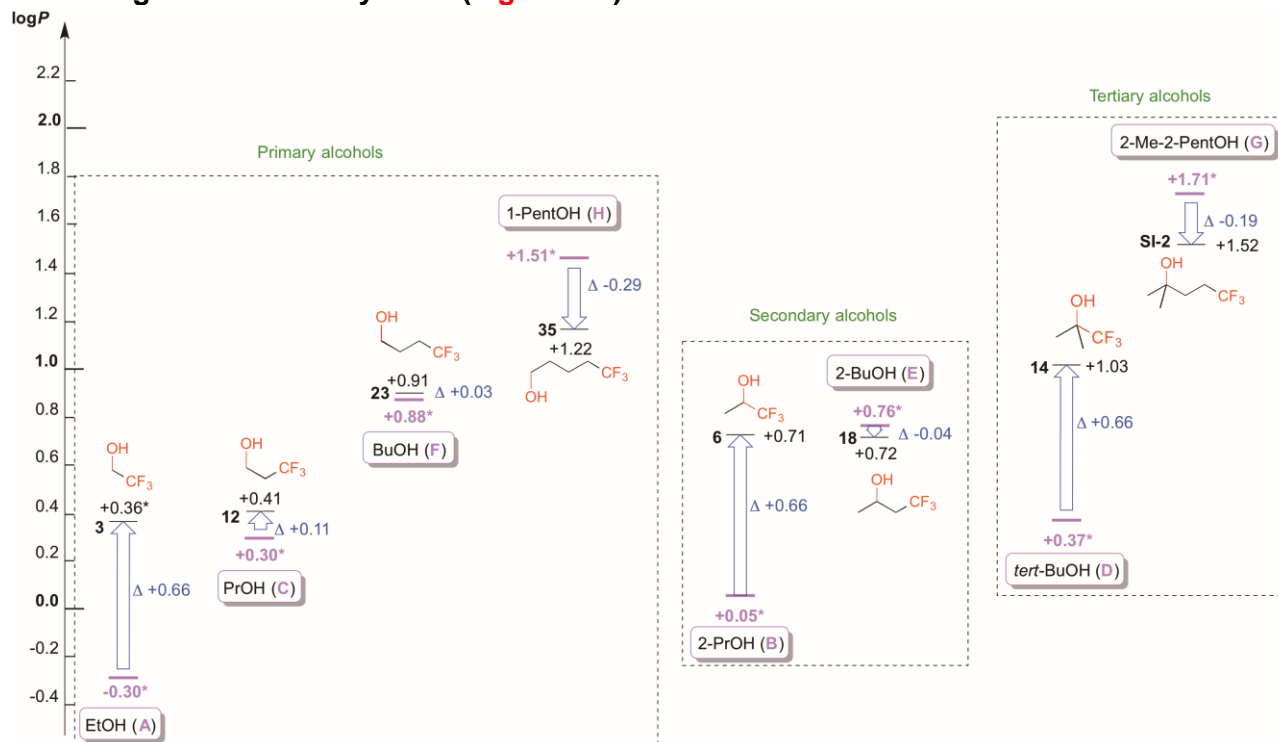

### 1.3. Extending polyfluorination: from omega tri- to pentafluorination (Figure SI3)

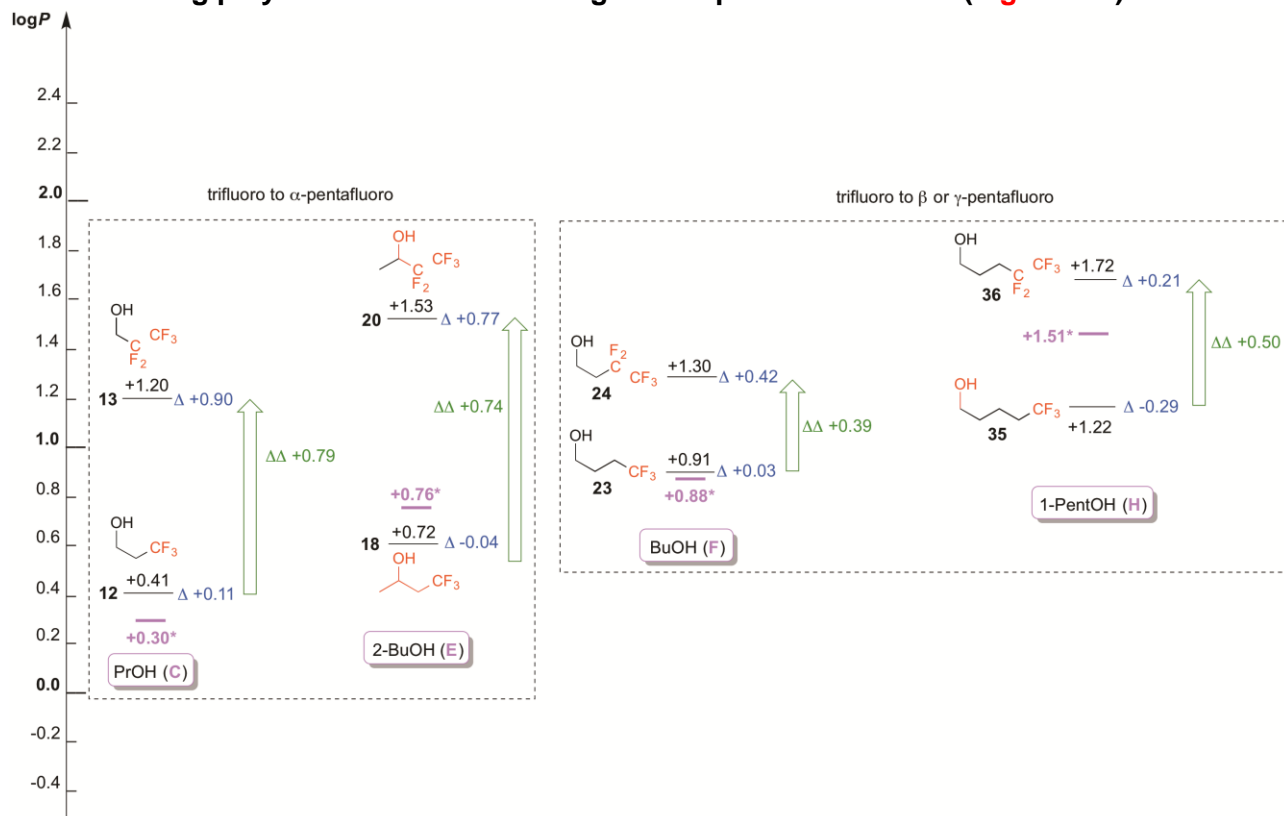

### 1.4. Geminal difluorination (Figure SI4)

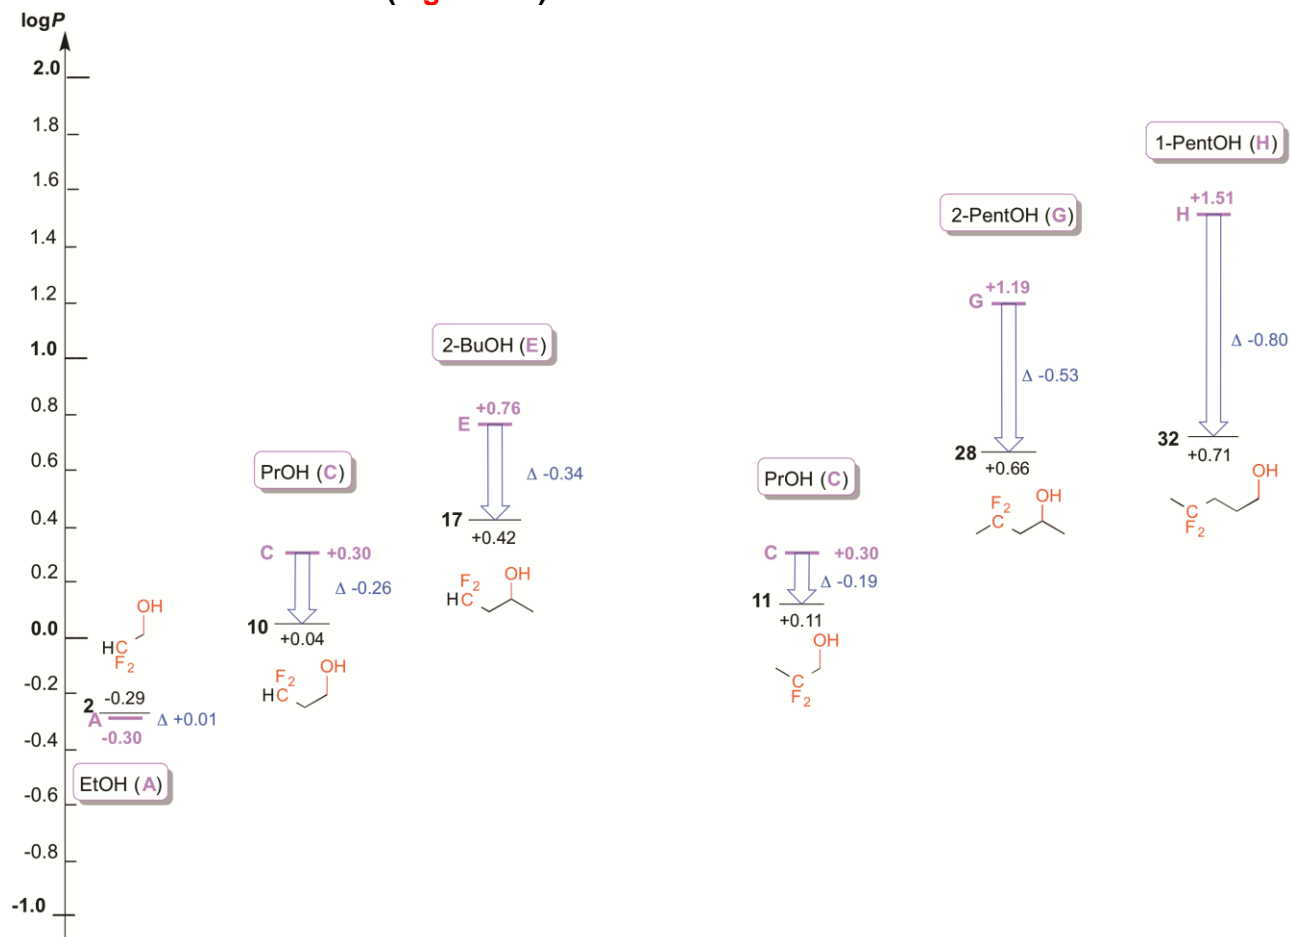

## 1.5. Monofluorination 1 (Figure S15)

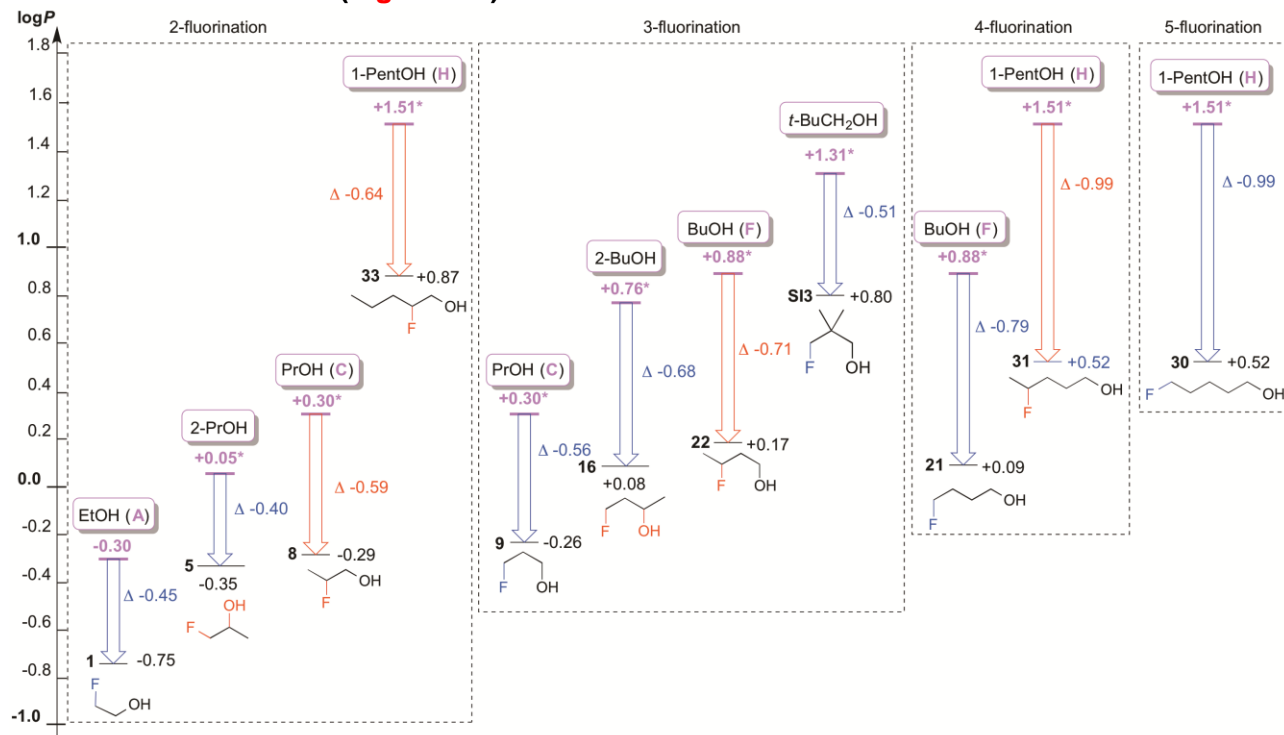

## 1.6. Monofluorination 2: diastereomers (Figure S16)

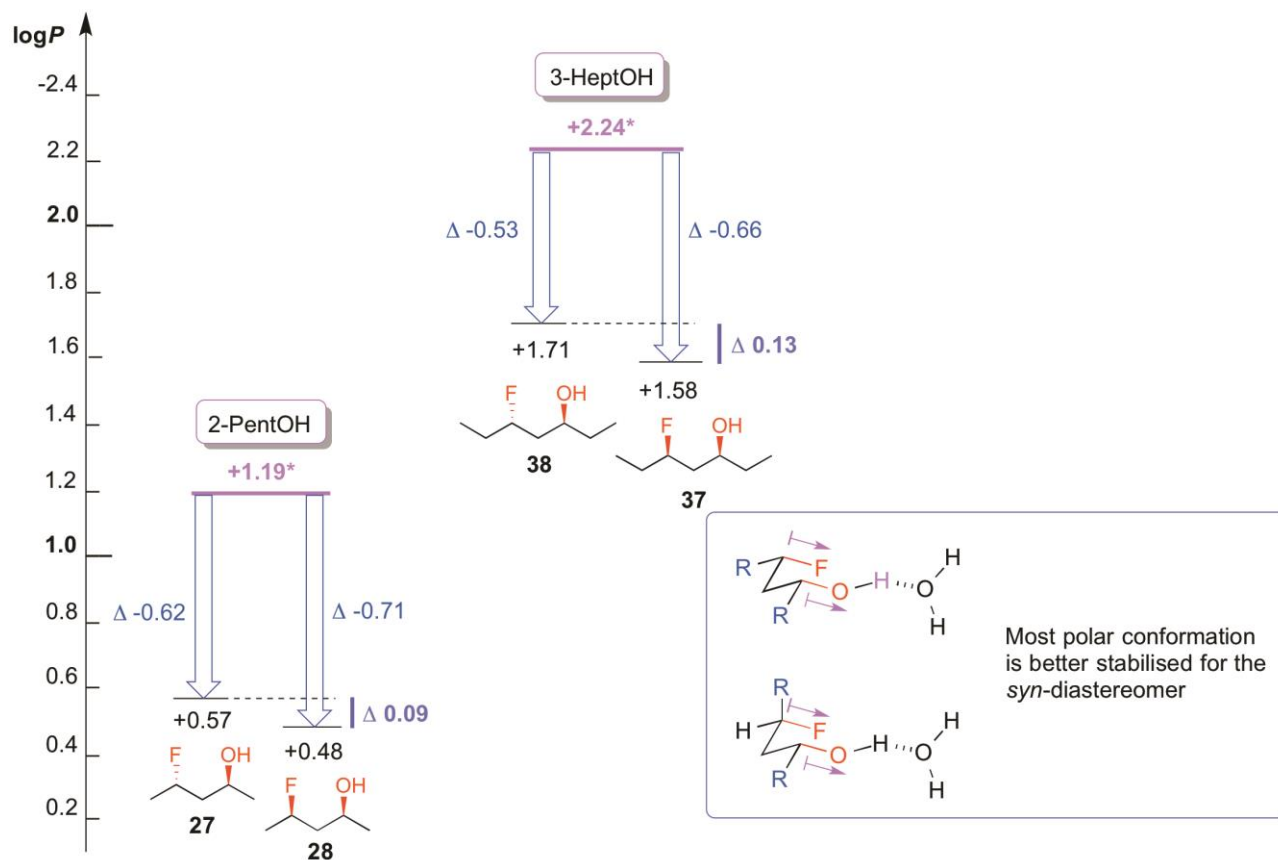

1.7. Adding fluorines: mono- to *gem*-difluorination 1 (Figure SI7)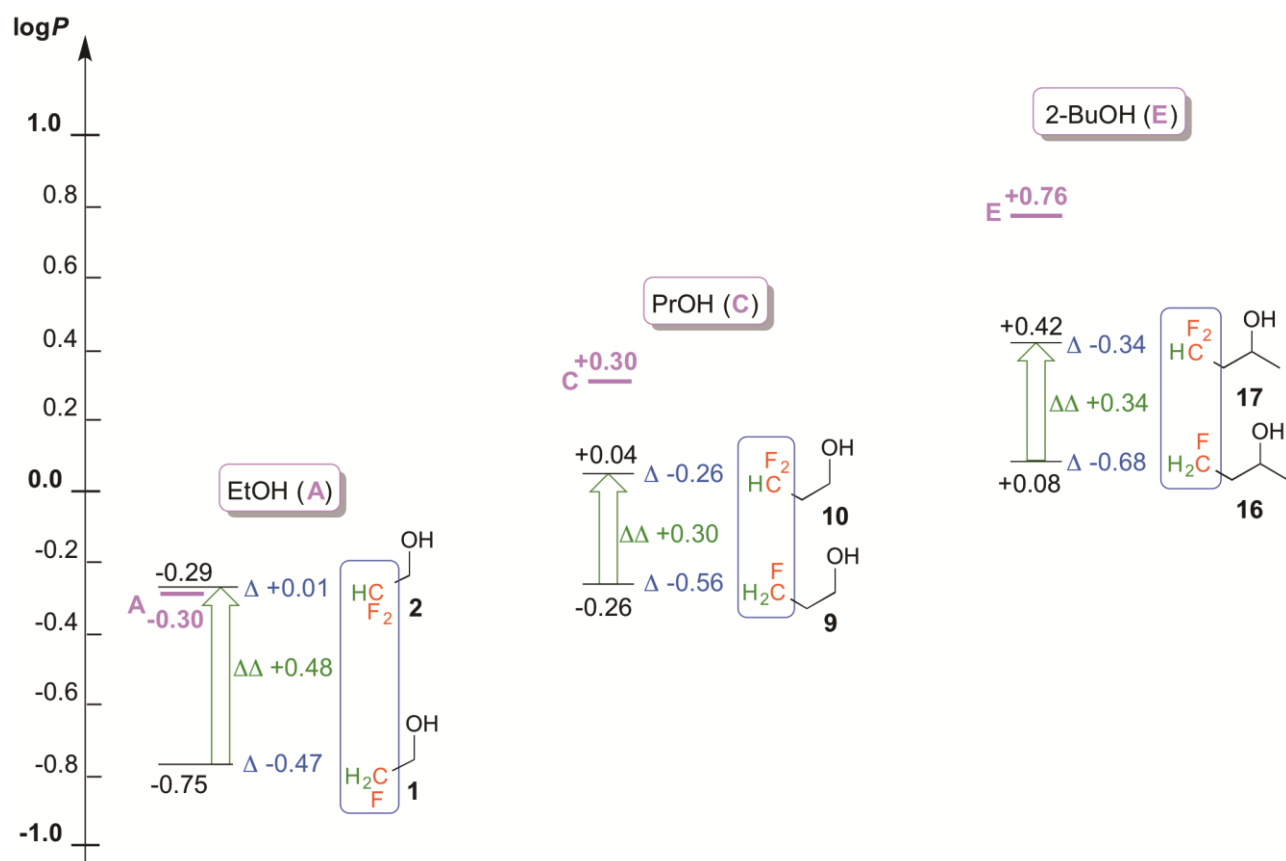1.8. Adding fluorines: mono- to *gem*-difluorination 2 (Figure SI8)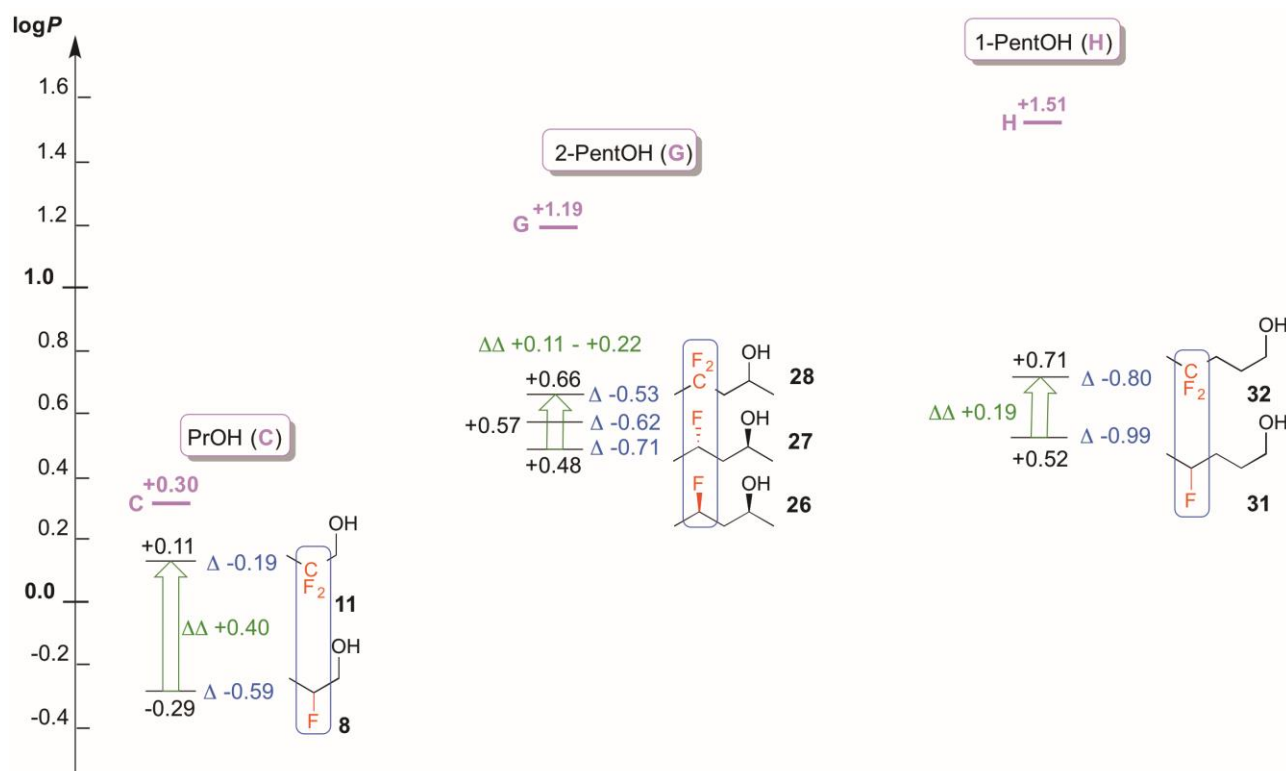

## 1.9. Adding fluorines (3): di to trifluorination; tetra to pentafluorination (Figure S19)

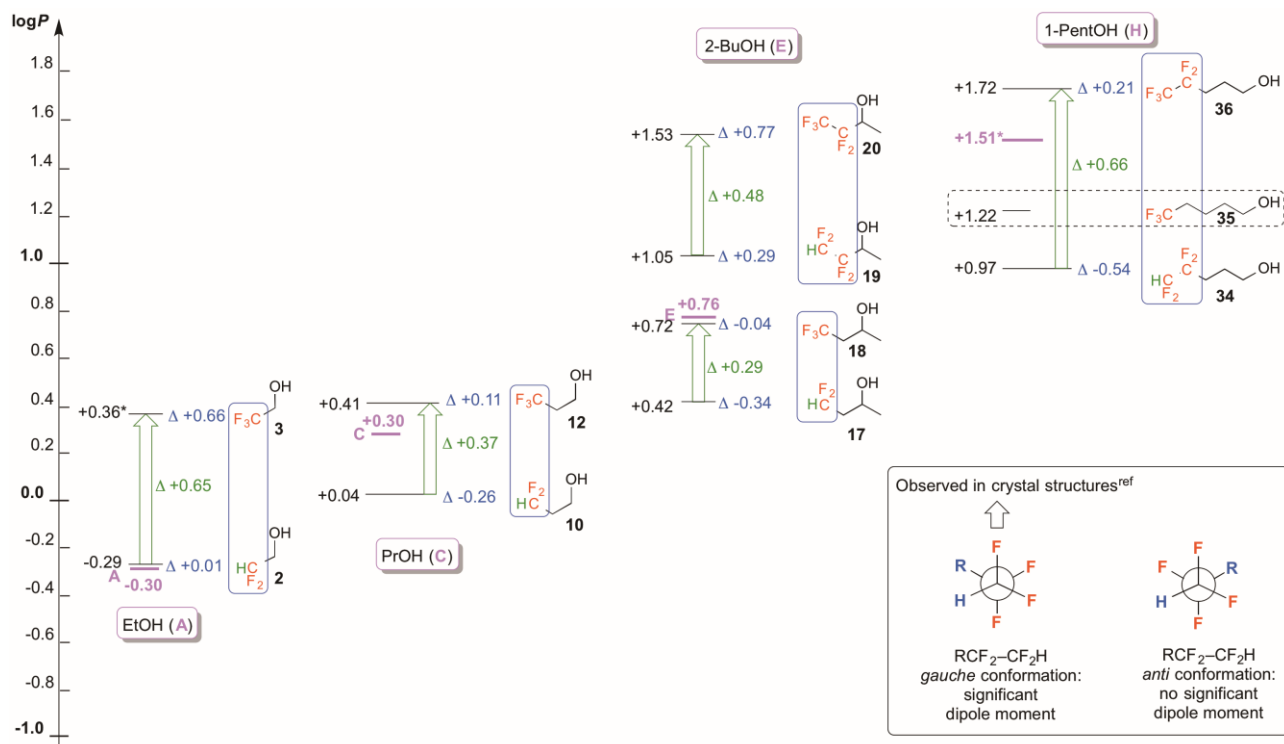

The -CF<sub>2</sub>CF<sub>2</sub>H *gauche*-conformation has been observed in crystal structures.<sup>1</sup>

<sup>1</sup> (a) N. Lu, K.-Y. Lin, C.-C. Kung, J.-W. Jhuo, Y. Zhou, J. Liu, L. Sun, *RSC Adv.* **2014**, *4*, 27329-27336; (b) Q.-R. Sun, Z.-X. Chen, S. Li, Y.-M. Wu, W.-S. Tian, *Chin. J. Chem.* **2008**, *26*, 1887-1892; (c) Q.-Y. Chen, Y.-M. Wu, J. Deng, *Synlett* **2006**, 645-647; (d) Y. Xu, S. Z. Zhu, *Tetrahedron* **1999**, *55*, 13725-13734; (e) R. Touillaux, G. Germain, J. P. Declercq, M. Vanmeerssche, C. Wilante, G. Leroy, *J. Fluorine Chem.* **1982**, *20*, 3-8.

## 2. Optimisation of the NMR method

Compound A: 2-fluoroethanol; Reference compound: 2,2,2-trifluoroethanol,  $\log P + 0.36$ ;

NMR data: au0814zw2/au0814zw3 (NMR 400-3)

### 2.1. Importance of H-decoupling Influence of proton-decoupling (NOE)(Table SI1)

| Entry 1 | SW (ppm) | O1P (ppm) | D1 (sec)          | decoupled | $\rho_{\text{oct}}$ | $\rho_{\text{wat}}$ | $\log P$ | $\Delta \log P$ |
|---------|----------|-----------|-------------------|-----------|---------------------|---------------------|----------|-----------------|
| 1       | 300      | -150      | O 18.36/ W 34.97  | yes       | 0.0832              | 1.0625              | -0.75    | 0.00            |
| 2       | 300      | -150      | O 18.36/ W 34.97  | no        | 0.0834              | 1.0749              | -0.75    |                 |
| 3       | 250      | -150      | O 18.36/ W 34.97  | yes       | 0.0821              | 1.0766              | -0.76    | -0.02           |
| 4       | 250      | -150      | O 18.36/ W 34.97  | no        | 0.0860              | 1.0727              | -0.74    |                 |
| 5       | 200      | -150      | O 18.36/ W 34.97  | yes       | 0.0826              | 1.0704              | -0.75    | 0.00            |
| 6       | 200      | -150      | O 18.36/ W 34.97  | no        | 0.0832              | 1.0651              | -0.75    |                 |
| 7       | 160      | -150      | O 18.36/ W 34.97  | yes       | 0.0828              | 1.0675              | -0.75    | 0.01            |
| 8       | 160      | -150      | O 18.36/ W 34.97  | no        | 0.0806              | 1.0662              | -0.76    |                 |
| 9       | 350      | -70       | O 18.36/ W 34.97  | yes       | 0.0401              | 0.5438              | -0.77    | -0.01           |
| 10      | 350      | -70       | O 18.36/ W 34.97  | no        | 0.0408              | 0.5379              | -0.76    |                 |
| 11      | 350      | -113      | O 18.36/ W 34.97  | yes       | 0.0660              | 0.8721              | -0.76    | 0.00            |
| 12      | 350      | -113      | O 18.36/ W 34.97  | no        | 0.0661              | 0.8672              | -0.76    |                 |
| 13      | 350      | -150      | O 18.36/ W 34.97  | yes       | 0.0847              | 1.0727              | -0.74    | 0.01            |
| 14      | 350      | -150      | O 18.36/ W 34.97  | no        | 0.0840              | 1.0723              | -0.75    |                 |
| 15      | 350      | -187      | O 18.36/ W 34.97  | yes       | 0.1069              | 1.3203              | -0.73    | 0.00            |
| 16      | 350      | -187      | O 18.36/ W 34.97  | no        | 0.1067              | 1.3217              | -0.73    |                 |
| 17      | 350      | -230      | O 18.36/ W 34.97  | yes       | 0.1643              | 2.0622              | -0.74    | -0.01           |
| 18      | 350      | -230      | O 18.36/ W 34.97  | no        | 0.1686              | 2.0921              | -0.73    |                 |
| 19      | 300      | -150      | O 1 / W 1         | yes       | 0.0660              | 0.8082              | -0.73    | -0.04           |
| 20      | 300      | -150      | O 1 / W 1         | no        | 0.0640              | 0.7209              | -0.69    |                 |
| 21      | 300      | -150      | O 5 / W 5         | yes       | 0.0746              | 0.8908              | -0.72    | -0.02           |
| 22      | 300      | -150      | O 5 / W 5         | no        | 0.0748              | 0.8496              | -0.70    |                 |
| 23      | 300      | -150      | O 18.36 / W 34.97 | yes       | 0.0823              | 1.0732              | -0.76    | -0.01           |
| 24      | 300      | -150      | O 18.36/ W 34.97  | no        | 0.0837              | 1.0704              | -0.75    |                 |

As shown in the Table SI1, with the same SW, O1P, and D1 parameter settings, no large difference (up to 0.04  $\log P$  units) was observed for 12 pairs of experiments from using non-proton decoupled and proton-decoupled  $^{19}\text{F}$  NMR. The integration ratios in NMR samples from both layers are also barely different. As described,<sup>2</sup> inverse-gated decoupling can remove the NOE and lead to a decoupled spectrum without NOE enhancement, and "This is because any NOE that builds up during the acquisition time affects only longitudinal magnetization so does not influence the detected (transverse) signals."

The benefit from using  $^{19}\text{F}$   $\{^1\text{H}\}$  NMR is that the decoupled spectrum has a higher signal-to-noise ratio (SNR), which provides higher accuracy for quantitative integration.

Conclusion: no significant influence from nOe *via* inverse gated decoupling.

<sup>2</sup> T. Claridge, High-Resolution NMR Techniques in Organic Chemistry", Pergamon, 1999, page 121, ISBN: 0080427987

## 2.2. Influence from SW (Table SI2)

| Entry 1 | SW (ppm) | O1P (ppm) | D1 (sec)         | decoupled | $\rho_{\text{oct}}$ | $\rho_{\text{wat}}$ | logP  |
|---------|----------|-----------|------------------|-----------|---------------------|---------------------|-------|
| 1       | 300      | -150      | O 18.36/ W 34.97 | yes       | 0.0832              | 1.0625              | -0.75 |
| 2       | 300      | -150      | O 18.36/ W 34.97 | no        | 0.0834              | 1.0749              | -0.75 |
| 3       | 250      | -150      | O 18.36/ W 34.97 | yes       | 0.0821              | 1.0766              | -0.76 |
| 4       | 250      | -150      | O 18.36/ W 34.97 | no        | 0.0860              | 1.0727              | -0.74 |
| 5       | 200      | -150      | O 18.36/ W 34.97 | yes       | 0.0826              | 1.0704              | -0.75 |
| 6       | 200      | -150      | O 18.36/ W 34.97 | no        | 0.0832              | 1.0651              | -0.75 |
| 7       | 160      | -150      | O 18.36/ W 34.97 | yes       | 0.0828              | 1.0675              | -0.75 |
| 8       | 160      | -150      | O 18.36/ W 34.97 | no        | 0.0806              | 1.0662              | -0.76 |

Note: the acquisition time is changed accordingly.

In Table SI2, with narrowing spectral width from 300 ppm to 160 ppm, the integration ratios in NMR samples from both layers as well as the final logP results remain nearly the same. Therefore, there is no influence from changing spectral width.

However, for compounds which are highly hydrophilic or lipophilic (hence resulting in a very low concentration in one of the phases), a narrower SW can result in higher digital resolution (dr) and high SNR, which is beneficial for quantitative integration.

## 2.3. Influence from O1P (Table SI3)

| Entry 1 | SW (ppm) | O1P (ppm) | D1 (sec)         | decoupled | $\rho_{\text{oct}}$ | $\rho_{\text{wat}}$ | logP  |
|---------|----------|-----------|------------------|-----------|---------------------|---------------------|-------|
| 9       | 350      | -70       | O 18.36/ W 34.97 | yes       | 0.0401              | 0.5438              | -0.77 |
| 10      | 350      | -70       | O 18.36/ W 34.97 | no        | 0.0408              | 0.5379              | -0.76 |
| 11      | 350      | -113      | O 18.36/ W 34.97 | yes       | 0.0660              | 0.8721              | -0.76 |
| 12      | 350      | -113      | O 18.36/ W 34.97 | no        | 0.0661              | 0.8672              | -0.76 |
| 13      | 350      | -150      | O 18.36/ W 34.97 | yes       | 0.0847              | 1.0727              | -0.74 |
| 14      | 350      | -150      | O 18.36/ W 34.97 | no        | 0.0840              | 1.0723              | -0.75 |
| 15      | 350      | -187      | O 18.36/ W 34.97 | yes       | 0.1069              | 1.3203              | -0.73 |
| 16      | 350      | -187      | O 18.36/ W 34.97 | no        | 0.1067              | 1.3217              | -0.73 |
| 17      | 350      | -230      | O 18.36/ W 34.97 | yes       | 0.1643              | 2.0622              | -0.74 |
| 18      | 350      | -230      | O 18.36/ W 34.97 | no        | 0.1686              | 2.0921              | -0.73 |

As indicated in Table SI3, the integration ratio in NMR sample from individual layer changed dramatically when changing the O1P setting, e.g., O1P at -70 ppm ( $\rho_{\text{oct}}$  0.0401, Entry 9) to O1P at -350 ppm ( $\rho_{\text{oct}}$  0.1686, Entry 17). The O1P setting is centered in Entry 13 and Entry 14, which is the optimum setting for quantitative integration.

However, the integration ratio changes seen in the two layers of a given partition experiment are increased/decreased proportionally and as a result, the obtained logP results remain nearly the same (with error up to 0.02 logP units). Because from the equation  $\log P^A = \log P^{\text{ref}} + \log(\rho_{\text{oct}}/\rho_{\text{wat}})$ , the final logP result depends on  $\rho_{\text{oct}}/\rho_{\text{wat}}$ , which is a ratio of a ratio. Therefore, all the systematic errors are canceled out. Due to this compensation effect, the logP results obtained have only very small error up to 0.02. For practical logP determination, the optimum O1P value (centered between the chemical shifts of the fluorine peaks) will be used. These chemical shifts, if unknown, can be obtained by initial acquisition of the respective  $^{19}\text{F}$  NMR spectra in each solvent.



## 2.4. Influence from D1 (Table SI4)

| NMR: au0814zw2/au0814zw3 (NMR 400-3) logP -0.75 |            |          |           |                   |           |                     |                     |       |
|-------------------------------------------------|------------|----------|-----------|-------------------|-----------|---------------------|---------------------|-------|
| Entry 1                                         | Tube Nr. 1 | SW (ppm) | O1P (ppm) | D1 (sec)          | decoupled | $\rho_{\text{oct}}$ | $\rho_{\text{wat}}$ | logP  |
| 19                                              | 300        | -150     |           | O 1 / W 1         | yes       | 0.0660              | 0.8082              | -0.73 |
| 20                                              | 300        | -150     |           | O 1 / W 1         | no        | 0.0640              | 0.7209              | -0.69 |
| 21                                              | 300        | -150     |           | O 5 / W 5         | yes       | 0.0746              | 0.8908              | -0.72 |
| 22                                              | 300        | -150     |           | O 5 / W 5         | no        | 0.0748              | 0.8496              | -0.70 |
| 23                                              | 300        | -150     |           | O 18.36 / W 34.97 | yes       | 0.0823              | 1.0732              | -0.76 |
| 24                                              | 300        | -150     |           | O 18.36 / W 34.97 | no        | 0.0837              | 1.0704              | -0.75 |

In the Table SI4, NMR parameter experiments regarding pulse delay time were carried out. From the default D1 setting of 1 sec up to 5\*T1 (which is the standard D1 setting for quantitative integration to allow the spins to fully relax before next pulse), the integration ratios from spectra acquired with short D1 have errors as insufficient pulse delay leads to the perturbation of the signal intensities.<sup>3</sup>

As the spin-lattice relaxation time (T1) for both diagnostic F nuclei are different in the octanol and water phase, systematic errors are not completely cancelled out (the compensation effect doesn't apply). Comparing Entry 20 and 24 (with non-proton decoupling), the error is up to 0.06 logP unit.

Therefore, it is recommended to have sufficient pulse delay (at least 5\*T1) to obtain a more accurate integration ratio for the logP measurement.

## 2.5. Importance of S/N ratio.

For highly hydrophilic compounds, most of the compound will partition to the octanol layer. Thus, compound concentration in water layer will be relatively very low. Similarly, the concentration for highly hydrophilic compound in octanol will be very low.

Very low concentration leads to observed F signal with very low signal-to-noise ratio, which is not suitable for quantitative integration with high accuracy. The appropriate S/N ratio for quantitative analysis is recommended to be above 300:1.<sup>4</sup> A simple way to increase S/N ratio is to increase NS for NMR experiment.

As illustrated by the three examples below, the integration ratios obtained were increased significantly when increasing the number of scans from NS 64 to NS 4096. Interestingly, in these three cases, the integration ratios is nearly identical, leading to nearly same logP results.

Based on these examples, it is found that reliable integration ratios can be still obtained with S/N ratio lower than 100:1.

### Example 1:

Reference: 2-fluorophenol, logP = +1.70;

NMR parameters: D1: 60 sec; SW: 100 ppm; O1P: centered.

The octanol phase [ZW7157-87-1 OCT, AVIIIHD400-3: ap0115zw3]:  $\rho_{\text{oct}} = 2.2293$ .

### With NS 64 for the water phase:

[ZW7157-87-1 WAT, AVIIIHD400-3: ap0115zw4]

The reference: **S/N ratio** at  $\delta_{\text{F}}$  -137.84 ppm: **136.73/1**)

Compound A: **S/N ratio** (at  $\delta_{\text{F}}$  -188.71 ppm): **89.06/1**;

<sup>3</sup> T. Claridge, High-Resolution NMR Techniques in Organic Chemistry", Pergamon, 1999, page 115, ISBN: 0080427987

<sup>4</sup> F.-F. Zhang, M.-H. Jiang, L.-L. Sun, F. Zheng, L. Dong, V. Shah, W.-B. Shen, Y. Ding, *Analyst* **2015**, *140*, 280-286;

The  $\rho_{\text{wat}} = 65.23/100.00 = 0.6523$ ; hence **log P = +2.234**

ap0115zw4.010.esp

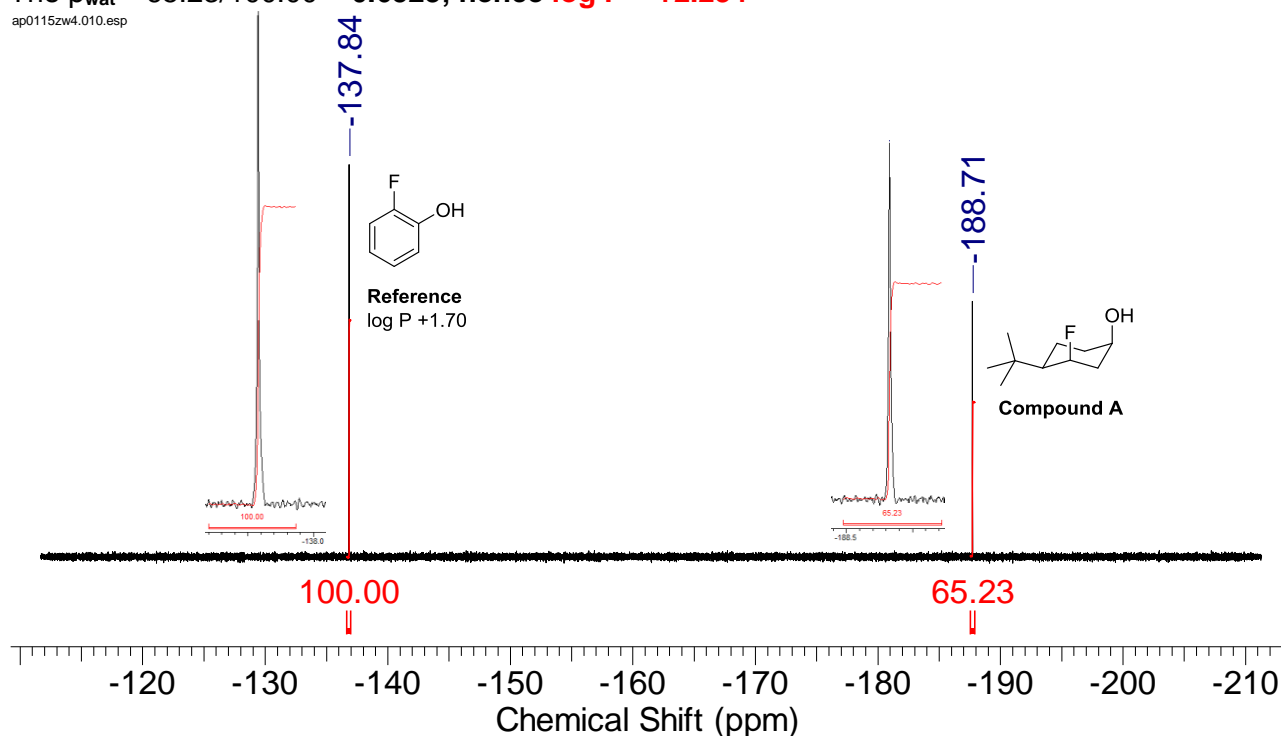

**With NS 4096 for the water phase**

[ZW7157-87-1 WAT [AVII400-2: my0115njwzw1];

NMR parameters; D1: 60 sec; SW: 100 ppm; O1P: centered;

The reference: **S/N ratio** at  $\delta_{\text{F}}$  -137.84 ppm: **1337.48/1**;

Compound A: **S/N ratio** at  $\delta_{\text{F}}$  -188.71 ppm: **736.66/1**

This results in a  $\rho_{\text{wat}} = 65.82/100.00 = 0.6582$ ; **log P = +2.230 ( $\Delta\log P$  0.004)**

my0115njwzw1.002.esp

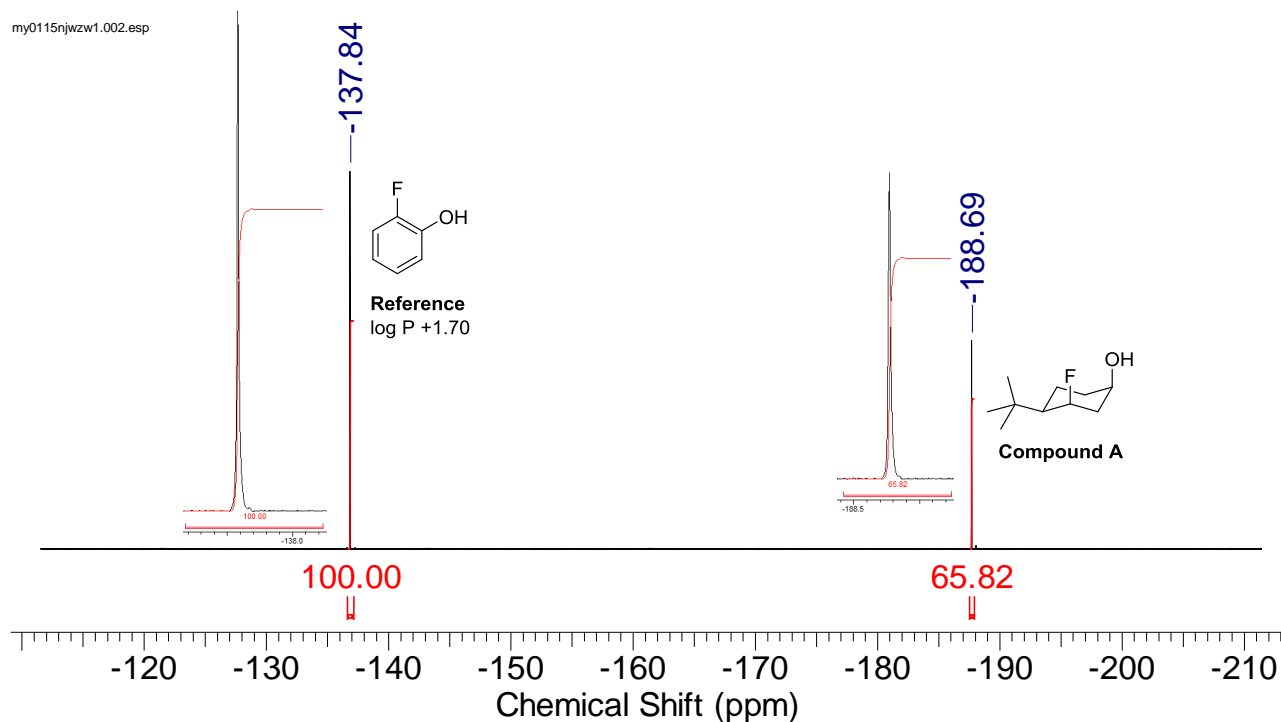

**Example 2:**

Reference: 2-fluorophenol log P +1.70;

NMR parameters: D1: 60 sec; SW: 100 ppm; O1P: centered

The octanol phase [ZW7157-82-1 OCT, AVII400-2: ma2715njwzw1]:  $\rho_{\text{oct}} = 2.1788$

**With NS 64 for the water phase:**

ZW7157-82-1 WAT [AVIIIHD400-3: ma3115zw4]

The reference: **S/N ratio** at  $\delta_{\text{F}}$  -137.85 ppm: **129.86/1**;

Compound A: **S/N ratio** at  $\delta_{\text{F}}$  -177.24 ppm: **36.67/1**;

The  $\rho_{\text{wat}} = 26.66/100.00 = 0.2666$ ; hence **log P = +2.612**

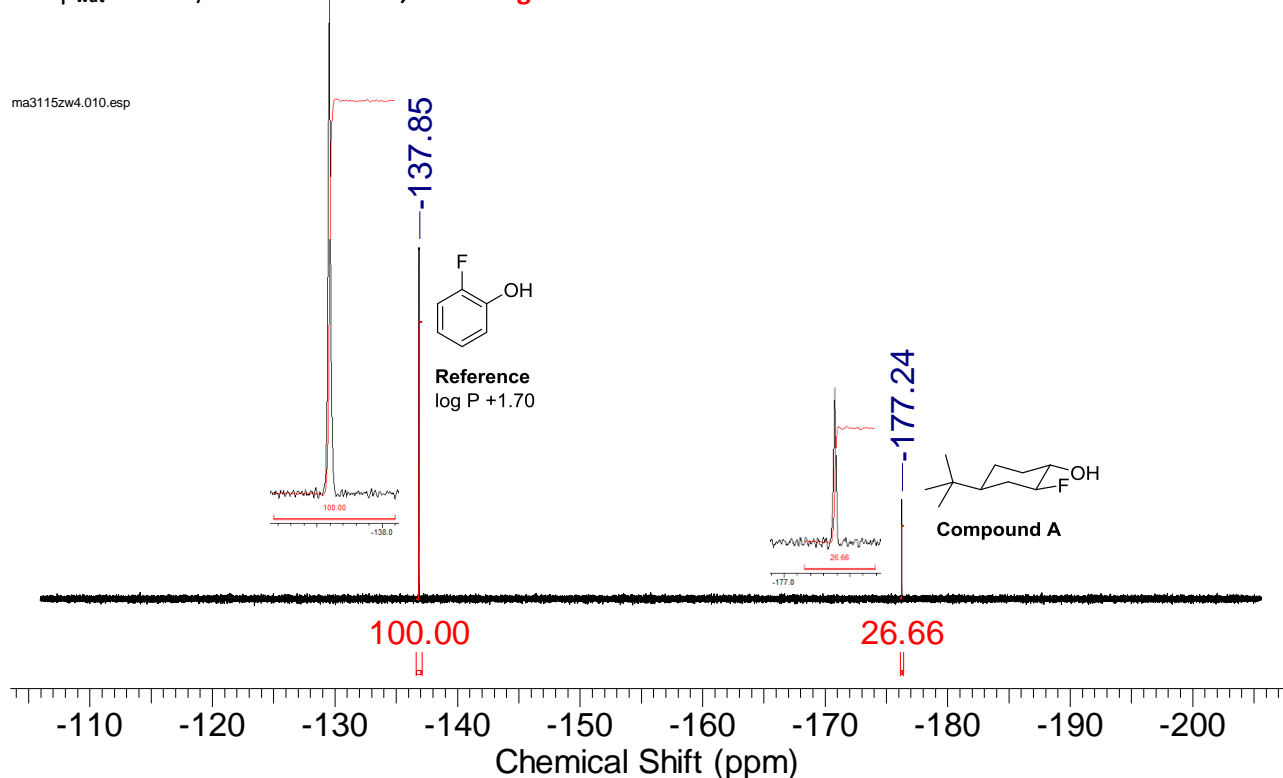

**With NS 4096 for the water phase:**

[ZW7157-82-1 WAT [AVII400-2: ma2715njwzw2]

NMR parameters: D1: 60 sec; SW: 100 ppm; O1P: centered;

The reference: **S/N ratio** at  $\delta_{\text{F}}$  -137.85 ppm: **1433.39/1**;

Compound A: **S/N ratio** at  $\delta_{\text{F}}$  -177.22 ppm: **371.30/1**;

This results in a  $\rho_{\text{wat}} = 26.89/100.00 = 0.2689$ ; hence **log P = +2.609**.

ma2715njzw2.002.esp

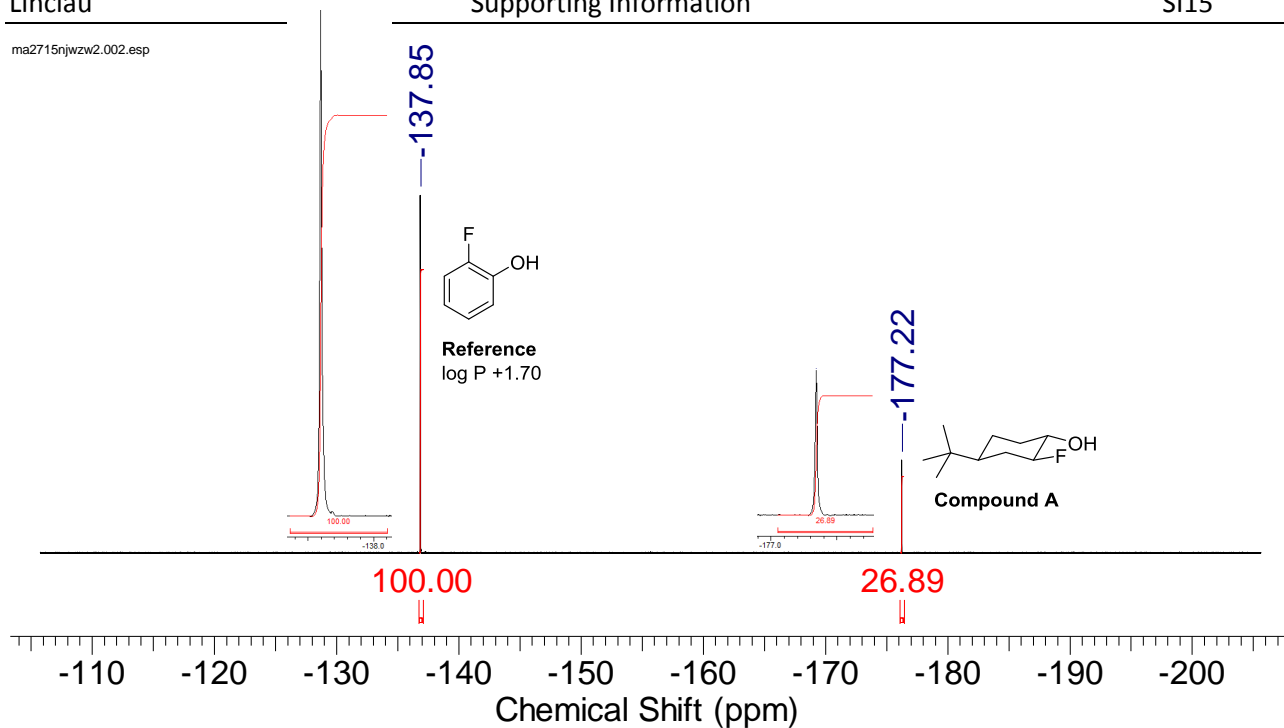**Example 3:**

Reference: 2-fluorophenol log P +1.70

NMR parameters: D1: 60 sec; SW: 300 ppm; O1P: centered

The octanol phase [ZW7157-44 OCT, AVIIHD400-3: nv1214zw3]:  $\rho_{\text{oct}} = 1.4736$ **With NS 64 for the water phase:**

ZW7157-44 WAT [AVIIHD400-3: nv1214zw4];

The reference: **S/N ratio** at  $\delta_{\text{F}}$  -138.54 ppm: **114.34/1**;Compound A: **S/N ratio** at  $\delta_{\text{F}}$  -201.37 ppm: **21.51/1**;The  $\rho_{\text{wat}} = 17.38/100.00 = 0.1738$ ; hence **log P = +2.628**

nv1214zw4.010.esp

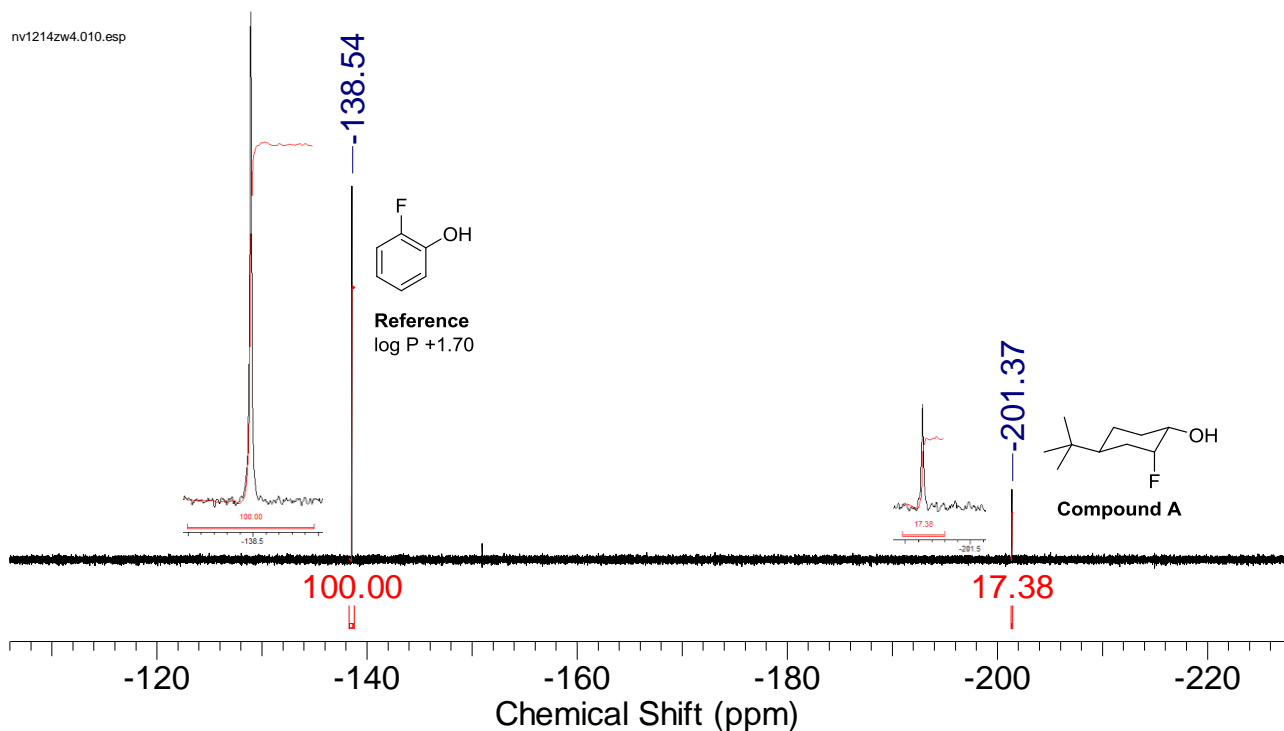

**With NS 4096 for the water phase:**

ZW7157-44 WAT capillary for lock [AVII400-2: ja3015njwzw1];

NMR parameters: D1: 60 sec; SW: 120 ppm; O1P: centered;

The reference: **S/N ratio** at  $\delta_F$  -138.54 ppm: **1194.16/1**;Compound A: **S/N ratio** at  $\delta_F$  -201.35 ppm: **229.99/1**;The  $\rho_{\text{wat}} = 17.26/100.00 = 0.1726$ ; hence **log P = +2.631**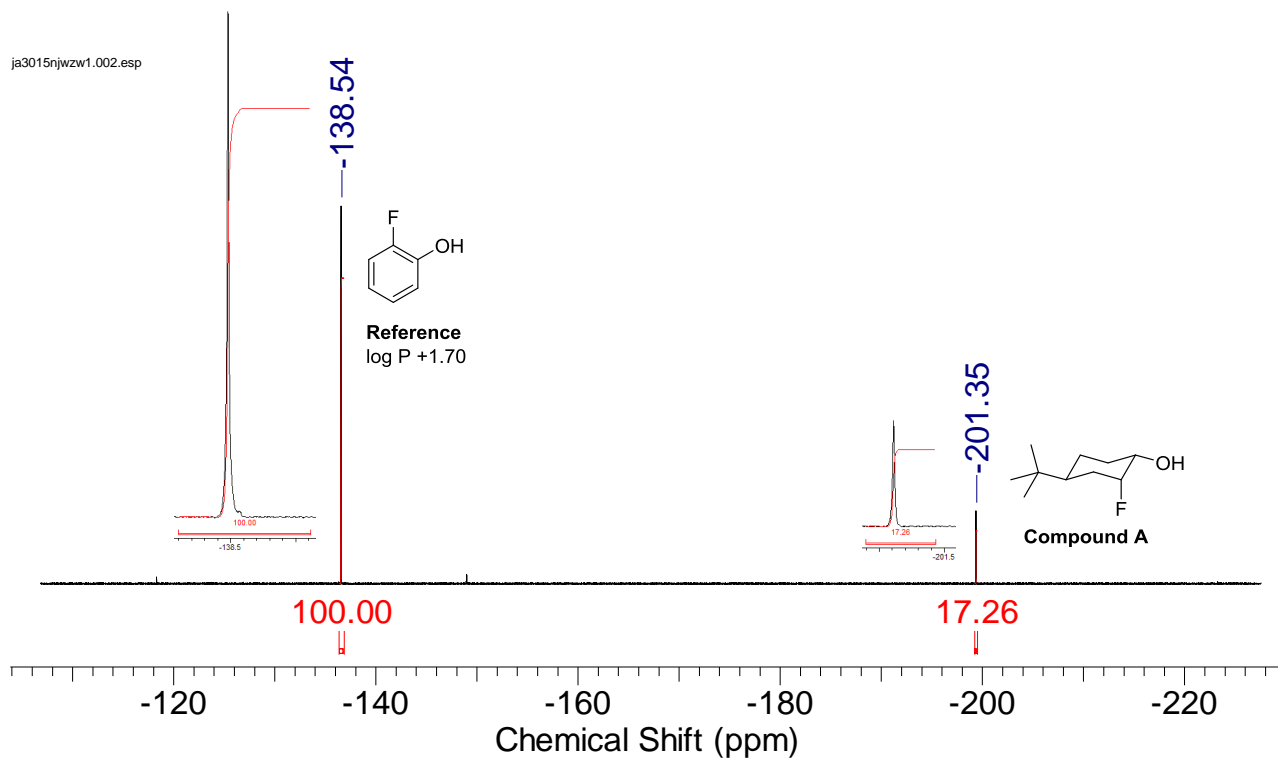

### 3. T1 measurements

The spin-lattice relaxation time (T1) is a molecular property, depending on many external factors, such as impurities, oxygen content, temperature, solvent/solvent systems, compound concentration, etc. The NMR sample prepared from log*P* experiments is individually different (e.g., compound concentration, and compound mixture). In addition, an amount of acetone-*d*<sub>6</sub> is added as solvent lock, the volume of which is not precisely measured. Hence, there are no reported T1 values in the literature for such compounds in this solvent mixture. Therefore, T1 values for individual NMR tubes of the diagnostic F nucleus were measured, in order to allow appropriate D1 settings for accurate quantitative integration. The T1 value was measured for the appropriate F nucleus using inversion-recovery sequence.

#### 3.1. Protocol

The test sample in a sealed tube was inserted into the NMR spectrometer. Following automatic locking and gradient shimming, a simple <sup>19</sup>F spectrum was recorded on the non-spinning sample to assess the required SW and frequency offset ( $\sigma$ 1p). The 90° pulse was measured with the automated pulsecal routine (if the signal:noise was sufficient, else manually by adjusting the pulse width to find the signal null at the 360° pulse). The measured 90° pulse (and thus, calculated 180° pulse), SW and  $\sigma$ 1p were transferred into the inversion-recovery experiment and number of scans selected to afford suitable signal:noise for the calculation. The data were transferred into the "TopSpin T1/T2 Module" and fitted to provide the measured T1 value.

**3.2. Results (Table SI5)**

| T1 measurement (sec) |             |                                              |              |                                                       |              |                                              |              |
|----------------------|-------------|----------------------------------------------|--------------|-------------------------------------------------------|--------------|----------------------------------------------|--------------|
| Entry                | Experiment  | $\text{CF}_3\text{CH}_2\text{OH}$            |              | $\text{FCH}_2\text{CH}_2\text{OH}$                    |              |                                              |              |
|                      |             | Oct                                          | Wat          | Oct                                                   | Wat          |                                              |              |
| 1                    | VP7220-96-1 | 3.085                                        | 3.597        | <b>3.671</b>                                          | <b>6.994</b> |                                              |              |
| 2                    | VP7220-96-2 | 2.298                                        | 2.884        | <b>2.883</b>                                          | <b>7.908</b> |                                              |              |
| 3                    | VP7220-96-3 | 2.474                                        | 3.98         | <b>3.78</b>                                           | <b>7.219</b> |                                              |              |
|                      |             |                                              |              | $\text{FCH}_2\text{CH}(\text{OH})\text{CH}_2\text{F}$ |              |                                              |              |
| 4                    | VP7365-1-1  | 2.008                                        | 3.993        | <b>2.737</b>                                          | <b>5.946</b> |                                              |              |
|                      |             |                                              |              | $\text{CHF}_2\text{CH}_2\text{OH}$                    |              |                                              |              |
| 5                    | VP7365-2-1  | 2.377                                        | 4.089        | <b>2.562</b>                                          | <b>4.282</b> |                                              |              |
|                      |             |                                              |              | $\text{CH}_3\text{CHF}_2\text{CH}_2\text{OH}$         |              |                                              |              |
| 6                    | VP7220-94-1 | <b>2.343</b>                                 | <b>4.177</b> | 2.302                                                 | 3.801        |                                              |              |
|                      |             |                                              |              |                                                       |              |                                              |              |
|                      |             | $\text{CF}_3\text{CH}_2\text{OH}$            |              | $\text{CF}_3\text{CF}_2\text{CH}_2\text{OH}$          |              | $\text{CF}_3\text{CF}_2\text{CH}_2\text{OH}$ |              |
|                      |             | Oct                                          | Wat          | Oct                                                   | Wat          | Oct                                          | Wat          |
| 7                    | ZW7157-26-3 | <b>2.394</b>                                 | <b>4.223</b> | 2.393                                                 | 3.951        | 2.101                                        | 3.492        |
| 8                    | ZW7157-26-1 | 2.363                                        | <b>4.062</b> | <b>2.406</b>                                          | 3.892        | 2.131                                        | 3.414        |
|                      |             | $\text{CF}_3\text{CF}_2\text{CH}_2\text{OH}$ |              | $\text{CF}_3\text{CF}_2\text{CH}_2\text{OH}$          |              | $\text{FCH}_2\text{CH}_2\text{OH}$           |              |
| 9                    | ZW7157-28-1 | 2.424                                        | 3.948        | 2.195                                                 | 3.743        | <b>4.589</b>                                 | <b>7.663</b> |
| 10                   | ZW7157-28-2 | 2.466                                        | 3.779        | 2.241                                                 | 3.666        | <b>3.953</b>                                 | <b>7.615</b> |
| 11                   | ZW7157-28-3 | 2.185                                        | 3.917        | 1.947                                                 | 3.378        | <b>3.347</b>                                 | <b>7.229</b> |

In all cases, the mixture of two compounds is partitioned between octanol and water, the phases separated, an aliquot of each phase transferred to an individual NMR tube, a quantity of acetone- $d_6$  added, and the tube sealed.

Entries 1–3 represent three experiments in which a mixture of trifluoroethanol and fluoroethanol is used (prepared independently, using different amounts of compound). It is easily seen that the determined T1 value varies between the different experiments. The same is observed in entries 7,8 and 9–11.

Overall, it can be seen that T1 for monofluorinated compounds are longer than that of di- and trifluorinated compounds. Also, the T1 in the octanol sample is shorter than that from the water sample.

The longest T1 value in octanol was observed for 2-fluoroethanol with T1 value of 4.589 sec (< 5 sec). Similarly, the longest T1 value in water NMR sample was observed for 2-fluoroethanol with T1 value of 7.908 sec (< 8 sec).

Because T1 determinations are very timeconsuming, and based on the dataset collected, **for practical purposes it is recommended to use a D1 of 30 sec for the octanol sample and of 60 sec for the water sample as pulse delay, given the D1 value should be greater than 5\*T1 for quantitative integration.**

#### 4. Influence of Intermolecular interactions (Table SI6)

(Concentration of samples – how much material can be used)

ca. 2 mL of octanol and ca. 2 mL of water were used for each partition;

Compound A:  $\text{CF}_3\text{CF}_2\text{CH}_2\text{OH}$  (lit  $\log P$  1.23, see below Table SI12); Reference compound:  $\text{CF}_3\text{CH}_2\text{OH}$ ;

| Entry | $m_A^*$<br>(mg) | $m_{\text{REF}}^*$ (mg) | $\rho_{\text{oct}}$ | $\rho_{\text{wat}}$ | $\log P$ | average<br>(error)        |
|-------|-----------------|-------------------------|---------------------|---------------------|----------|---------------------------|
| 1     | 2.0             | 0.8                     | 2.1983 (oc0214zw1)  | 0.3163 (oc0214zw2)  | 1.202    | +1.200<br>( $\pm 0.001$ ) |
| 2     | 2.0             | 0.8                     | 1.9761 (oc0214zw3)  | 0.2854 (oc0214zw4)  | 1.200    |                           |
| 3     | 2.0             | 0.8                     | 2.3148 (oc0214zw5)  | 0.3352 (oc0214zw6)  | 1.199    |                           |
| 4     | 10.0            | 4.0                     | 2.1598 (se1914zw1)  | 0.3117 (se1914zw2)  | 1.201    | +1.199<br>( $\pm 0.003$ ) |
| 5     | 10.0            | 4.0                     | 2.1723 (se1914zw3)  | 0.3140 (se1914zw4)  | 1.200    |                           |
| 6     | 10.0            | 4.0                     | 2.1231 (se1914zw5)  | 0.3105 (se1914zw5)  | 1.195    |                           |
| 7     | 70.0            | 30.0                    | 2.2576 (ju1215zw25) | 0.3404 (ju1215zw26) | 1.182    | +1.181<br>( $\pm 0.001$ ) |
| 8     | 70.0            | 70.0                    | 2.2214 (ju1215zw27) | 0.3346 (ju1215zw28) | 1.182    |                           |
| 9     | 70.0            | 70.0                    | 2.2991 (ju1215zw29) | 0.3488 (ju1215zw30) | 1.179    |                           |
| 10    | 120.0           | 60.0                    | 1.8726 (ju1215zw31) | 0.2886 (ju1215zw32) | 1.172    | +1.175<br>( $\pm 0.002$ ) |
| 11    | 120.0           | 60.0                    | 1.8875 (ju1215zw33) | 0.2872 (ju1215zw34) | 1.178    |                           |
| 12    | 120.0           | 60.0                    | 1.9581 (ju1215zw35) | 0.3002 (ju1215zw36) | 1.174    |                           |

\*The amount of compound A/REF used is the approximate mass.

As shown in the table, the difference of  $\log P$  value due to **significantly** increased concentration (from 2 mg to 120 mg regarding substrate load of compound A) is only -0.025. Based on this dataset, it is proposed that intermolecular interactions have negligible influence for the substrate used.

The quantity that is generally used is between 5-10 mg.

## 5. Detailed log*P* determination protocol

### 1) Partitioning

To a 10 mL pear-shaped flask was added octanol (HPLC grade, ca. 2 mL), compound A (ca. 1–10 mg), reference compound R (ca. 1–10 mg, *primary reference 2,2,2-trifluoroethanol*) and water (HPLC grade, ca. 2 mL). The resulting biphasic mixture was stirred at 25 °C (temperature controlled by recirculating chiller) for 2 hours and then left to stand at 25 °C overnight to enable complete phase separation. In some cases the formation of a foam was observed, which resided at the octanol-water phase boundary. In this case, the vial was centrifuged for until disappearance of the foam.

### 2) Sample preparation

Using two 1 mL disposable syringes, ca. 0.7 – 0.85 mL was carefully taken from each layer. In particular for taking a water sample aliquot, ca. 0.05 mL of air was taken into syringe before putting the needle into the solution, and while moving through the upper octanol layer, the air was gently pushed out, in order to avoid the contamination of octanol phase, as very small amount of octanol phase may otherwise enter into the needle (which would cause a big error for lipophilic compounds). Upon reaching the water phase, all air bubbles are pushed out of the syringe, the aliquot takes, and the needle quickly removed from the solution. Then a small amount of water phase was discarded (to ensure all traces of octanol are out of the needle, leaving ca. 0.6 mL sample in the syringe). The needle was carefully wiped with dry tissue and then ca. 0.5 mL of sample was injected into the new NMR tube, followed by addition of ca. 0.1 mL acetone-*d*<sub>6</sub>. The NMR tube was sealed (checking for leaks) using a blow torch, and inverted carefully for 20 times to obtain a homogenous solution for NMR measurement.

### 3) NMR measurement

<sup>19</sup>F {<sup>1</sup>H} NMR was firstly run with standard parameter conditions for chemical shift identification. The frequency offset point (O1P) is centered between the two diagnostic F signals. If T1 values had not been determined, a D1 of 30 sec for the octanol sample, and 60 sec for the water sample is chosen. The spectral width (SW) is left at 300 ppm (but can be reduced to obtain better SNR ratio is required (should be >250)). The number of transients (NS) is left at 64 (but can be increased if higher SNR is required).

### 4) Data processing

Data were processed using ACD/Labs NMR software.

The obtained FID file was reprocessed using following conditions: WFunction (LB 2 Exponential), Zero Filling (from 65536 to 262144) and then Fourier transform, followed by phasing with mouse and auto baseline correction. The integration ratio was obtained by manual integration (bias correction can be applied *via* adjusting tilt and slope if integral curve is not parallel to the baseline).



## 6. Reproducibility of the method

### 6.1. Multiple acquisitions (Table SI7)

In this control experiment, 2-fluoro-pentan-1-ol and 2,2,2-trifluoroethanol (reference compound) were partitioned between octanol and water, giving two NMR samples.

Sample: ZW7157-98-1 OCT (AVIIIHD400-3)  
ZW7157-98-1 WAT (AVIIIHD400-3)

For each tube, seven acquisitions were taken, leading to seven sets of  $\rho$  values, giving seven  $\log P$  values. As can be seen in the Table, the error is negligible.

| Entry                     | $\rho_{\text{oct}}$ (ZW7157-98-1 OCT) | $\rho_{\text{wat}}$ (ZW7157-98-1 WAT) | $\log P$             |
|---------------------------|---------------------------------------|---------------------------------------|----------------------|
| 1                         | 0.5138 (my2315zw5)                    | 0.3580 (my2315zw6)                    | 0.5169               |
| 2                         | 0.5138 (my2415zw1)                    | 0.3550 (my2415zw2)                    | 0.5206               |
| 3                         | 0.5119 (my2615cqf2)                   | 0.3574 (my2615cqf3)                   | 0.5160               |
| 4                         | 0.5116 (my2815cqf3)                   | 0.3520 (my2815cqf4)                   | 0.5224               |
| 5                         | 0.5159 (ju0115cqf3)                   | 0.3493 (ju0115cqf4)                   | 0.5294               |
| 6                         | 0.5085 (ju0315cqf6)                   | 0.3510 (ju0315cqf7)                   | 0.5210               |
| 7                         | 0.5038 (ju1215zw23)                   | 0.3475 (ju1215zw24)                   | 0.5213               |
| <b>Average</b>            | 0.5113                                | 0.3529                                | 0.5211               |
| <b>Standard deviation</b> | $\pm 0.0037$ (0.73%)                  | $\pm 0.0037$ (1.06%)                  | $\pm 0.0040$ (0.77%) |

### 6.2. Multiple reprocessing (Table SI8)

In this control experiment, 2-fluoro-pentan-1-ol and 2,2,2-trifluoroethanol (reference compound) were partitioned between octanol and water, giving two NMR samples.

Sample: ZW7157-98-1 OCT (AVIIIHD400-3: my2315zw5)  
ZW7157-98-1 WAT (AVIIIHD400-3: my2315zw6)

The obtained FID file of each was reprocessed using following conditions: WFunction (LB 2 Exponential), Zero Filling (from 65536 to 262144) and then Fourier transform, followed by phasing with mouse and auto baseline correction. The integration ratio was obtained by manual integration (bias correction can be applied *via* adjusting tilt and slope if integral curve is not parallel to the baseline). This was done 7 times independently. As can be seen in the Table, the error is negligible.

| Entry                     | $\rho_{\text{oct}}$ (ZW7157-98-1 OCT) | $\rho_{\text{wat}}$ (ZW7157-98-1 WAT) | $\log P$             |
|---------------------------|---------------------------------------|---------------------------------------|----------------------|
| 1                         | 0.5138                                | 0.3580                                | 0.5169               |
| 2                         | 0.5108                                | 0.3594                                | 0.5127               |
| 3                         | 0.5143                                | 0.3554                                | 0.5205               |
| 4                         | 0.5128                                | 0.3575                                | 0.5167               |
| 5                         | 0.5146                                | 0.3588                                | 0.5166               |
| 6                         | 0.5140                                | 0.3544                                | 0.5215               |
| 7                         | 0.5146                                | 0.3572                                | 0.5186               |
| <b>Average</b>            | <b>0.5136</b>                         | <b>0.3572</b>                         | <b>0.5176</b>        |
| <b>Standard deviation</b> | $\pm 0.0013$ (0.25%)                  | $\pm 0.0017$ (0.46%)                  | $\pm 0.0027$ (0.52%) |

## 7. Validation of the method.

### 7.1. Internal validation (Tables S19,10)

| Sample A                                                                          | Reference R                                                                       | log P <sup>EXP</sup>    |
|-----------------------------------------------------------------------------------|-----------------------------------------------------------------------------------|-------------------------|
|  |  | -0.75<br>(-0.746±0.003) |
|  |  | +1.20<br>(+1.200±0.001) |
| <b>Δlog P 0.01</b>                                                                |                                                                                   |                         |
| Sample A                                                                          | Reference R                                                                       | log P <sup>EXP</sup>    |
|  |  | -0.76<br>(-0.758±0.006) |

| Sample A                                                                           | Reference R                                                                         | log P <sup>EXP</sup>    |
|------------------------------------------------------------------------------------|-------------------------------------------------------------------------------------|-------------------------|
| 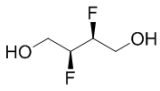 |  | -0.97<br>(-0.968±0.009) |
|  |  | -1.01<br>(-1.009±0.002) |
| <b>Δlog P 0.01</b>                                                                 |                                                                                     |                         |
| Sample A                                                                           | Reference R                                                                         | log P <sup>EXP</sup>    |
|  |  | -0.98<br>(-0.980±0.004) |

The log $P$  of two compounds **1** and **13** is measured using trifluoroethanol as a reference.

Then, the log $P$  of **1** is measured using the just determined log $P$  value of **13** as reference, and the two log $P$  values of **1** are then compared.

Two examples are given, and in both cases both log $P$  values only differ by 0.01 units. This indicates that the nature of the reference does not influence the log $P$  determination.

The raw data for these experiments are given in **Table S111** (all measurements are carried out in triplicate):

| Sample A                                                                            | Reference                                                                                                   | Experiment (octanol/water) | $\rho_{\text{oct}}/\rho_{\text{wat}}$ | log $P$ | Average log $P$ | error              |
|-------------------------------------------------------------------------------------|-------------------------------------------------------------------------------------------------------------|----------------------------|---------------------------------------|---------|-----------------|--------------------|
| 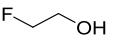 | <br>+0.36                | au0814zw2/<br>au0814zw3    | 0.0832/<br>1.0625                     | -0.746  | -0.75           | -0.746<br>(±0.003) |
|                                                                                     |                                                                                                             | au2614zw8/<br>au2614zw9    | 0.1102/<br>1.4167                     | -0.749  |                 |                    |
|                                                                                     |                                                                                                             | au2614zw10/<br>au2614zw11  | 0.1040/<br>1.3137                     | -0.741  |                 |                    |
|  | <br>+0.36                | oc0214zw1/<br>oc0214zw2    | 2.1983/<br>0.3163                     | +1.202  | +1.20           | 1.200<br>(±0.001)  |
|                                                                                     |                                                                                                             | oc0214zw3/<br>oc0214zw4    | 1.9761/<br>0.2854                     | +1.200  |                 |                    |
|                                                                                     |                                                                                                             | oc0214zw5/<br>oc0214zw6    | 2.3148/<br>0.3352                     | +1.199  |                 |                    |
|  | <br>+1.20 <sup>EXP</sup> | oc2414zw5/<br>oc0314zw2    | 0.1409/<br>13.0222                    | -0.766  | -0.76           | -0.758<br>(±0.006) |
|                                                                                     |                                                                                                             | oc0314zw3/<br>oc0314zw4    | 0.1612/<br>14.4914                    | -0.754  |                 |                    |
|                                                                                     |                                                                                                             | oc0314zw5/<br>oc0314zw6    | 0.1436/<br>12.9114                    | -0.754  |                 |                    |
|  | <br>-0.75                | nv2914zw3/<br>nv2914zw4    | 1.5649/<br>2.5229                     | -0.957  | -0.97           | -0.968<br>(±0.009) |
|                                                                                     |                                                                                                             | nv2914zw5/<br>nv2914zw6    | 1.3398/<br>2.2144                     | -0.968  |                 |                    |
|                                                                                     |                                                                                                             | nv2914zw7/<br>nv2914zw8    | 1.0521/<br>1.7864                     | -0.980  |                 |                    |

|                                                                                   |                                                                                                           |                          |                   |        |       |                    |
|-----------------------------------------------------------------------------------|-----------------------------------------------------------------------------------------------------------|--------------------------|-------------------|--------|-------|--------------------|
| 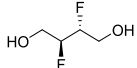 | <br>-0.75                | nv2714zw1/<br>nv2714zw2  | 1.5892/<br>2.8679 | -1.006 | -1.01 | -1.009<br>(±0.002) |
|                                                                                   |                                                                                                           | nv2714zw3/<br>nv2714zw4  | 1.4013/<br>2.5419 | -1.009 |       |                    |
|                                                                                   |                                                                                                           | nv2714zw5/<br>nv2714zw6  | 0.7770/<br>1.4206 | -1.012 |       |                    |
|  | <br>-1.01 <sup>EXP</sup> | dc0414zw5/<br>dc0414zw6  | 0.7556/<br>0.7076 | -0.981 | -0.98 | -0.980<br>(±0.004) |
|                                                                                   |                                                                                                           | dc0414zw7/<br>dc0414zw8  | 0.9740/<br>0.9168 | -0.984 |       |                    |
|                                                                                   |                                                                                                           | dc0414zw9/<br>dc0414zw10 | 1.1420/<br>1.0534 | -0.975 |       |                    |

7.2. Comparison between literature  $\log P$ , and the  $\log P$  measured (Table SI12)

| Compound                                                                            | Nr  | $\log P$ (lit)           | Reference <sup>[1]</sup> | exp. $\log P$ <sup>[2]</sup> | $\Delta \log P$ |
|-------------------------------------------------------------------------------------|-----|--------------------------|--------------------------|------------------------------|-----------------|
| 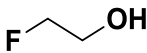   | 1   | -0.67 <sup>[3]</sup>     | TFE <sup>[4]</sup>       | -0.75                        | -0.08           |
|                                                                                     |     | -0.92 <sup>[5,6]</sup>   | TFE                      |                              | +0.17           |
|    | 2   | -0.33 <sup>[3]</sup>     | TFE                      | -0.29                        | +0.04           |
|    | 4   | -0.36 <sup>[3]</sup>     | TFE                      | -0.42                        | -0.06           |
|    | 6   | +0.70 <sup>[4]</sup>     | TFE                      | +0.71                        | +0.01           |
|                                                                                     |     | +0.71 <sup>[3,5,6]</sup> |                          |                              | +0.00           |
|    | 7   | +1.66 <sup>[3]</sup>     | TFE                      | +1.69                        | +0.03           |
|    | 9   | -0.28 <sup>[3]</sup>     | FE <sup>[7]</sup>        | -0.26                        | +0.02           |
|    | 12  | +0.39 <sup>[3,4]</sup>   | TFE                      | +0.41                        | +0.02           |
|    | 13  | +1.23 <sup>[3,6,9]</sup> | TFE                      | +1.20                        | -0.03           |
|    | 15  | +1.04 <sup>[3,4]</sup>   | TFE                      | +1.03                        | -0.01           |
|   | 18  | 0.71 <sup>[4]</sup>      | TFE                      | +0.72                        | +0.01           |
|  | 23  | +0.90 <sup>[3,4]</sup>   | TFE                      | +0.91                        | +0.01           |
|  | 25  | +1.94 <sup>[3]</sup>     | TFE                      | +1.98                        | +0.04           |
|                                                                                     |     | +1.81 <sup>[9]</sup>     |                          |                              | +0.18           |
|  | 35  | +1.15 <sup>[4]</sup>     | TFE                      | +1.22                        | +0.07           |
|  | SI4 | +1.71 <sup>[3,6,8]</sup> | TFE                      | +1.70                        | -0.01           |
|                                                                                     |     | +1.64 <sup>[6]</sup>     |                          |                              | +0.06           |

<sup>[1]</sup> 2,2,2-Trifluoroethanol;  $\log P$  +0.36<sup>5</sup> (method used for partition: shake-flask; method used for analysis: <sup>1</sup>H or <sup>19</sup>F NMR; temperature for  $\log P$  measurement: not reported). **This value used as reference value.** Other values (+0.41 and +0.32) reported in a Table in ref <sup>6</sup> and in ref <sup>7</sup> (original source not published);

<sup>[2]</sup> Average  $\log P$  value (at 25 °C, temperature controlled by recirculating chiller) from at least three experiments as listed in Table SI13;

<sup>[3]</sup>  $\log P$  data retrieved from U.S. National Library of Medicine online database: <http://chem.sis.nlm.nih.gov/chemidplus/>; partition and analysis method as well as temperature for  $\log P$  values are not provided;

<sup>[4]</sup> Value in ref 5; method used for partition: shake-flask; method used for analysis: <sup>1</sup>H or <sup>19</sup>F NMR; temperature for  $\log P$  measurement: not reported;

<sup>[5]</sup> Value in ref <sup>8</sup>; method used for partition: shake-flask (method of Hansch and Muir<sup>9</sup>); method used for analysis: gas chromatography (method developed by Bluestein and Posmanter<sup>10</sup>; temperature for  $\log P$  measurement: not reported;

<sup>[6]</sup> Value in ref 6. Partition and analysis method as well as temperature for  $\log P$  values are not provided;

<sup>[7]</sup> FE = 2-fluoroethanol. Experimentally determined  $\log P$  value (-0.75) for 2-fluoroethanol was used here as reference;

<sup>[8]</sup> Value in ref <sup>11</sup>. Method used for partition: shake-flask; analysis with Cary Model 14 spectrophotometer; temperature for  $\log P$  measurement: 25 ± 5 °C.

<sup>[9]</sup> Value in ref 7, p534. Partition method: not described; analysis method: using vapor-phase chromatography; temperature for  $\log P$  measurement: room temperature.

<sup>5</sup> N. Muller, *J. Pharm. Sci.* **1986**, *75*, 987-991.

<sup>6</sup> C. Hansch, A. Leo, in *Substituent constants for correlation analysis in chemistry and biology*. Wiley, **1979**.; partition and analysis method as well as temperature for  $\log P$  values are not provided.

<sup>7</sup> A. Leo, C. Hansch, D. Elkins, *Chem. Rev.* **1971**, *71*, 525-616.

<sup>8</sup> E. O. Dillingham, R. W. Mast, G. E. Bass, J. Autian, *J. Pharm. Sci.* **1973**, *62*, 22-30.

<sup>9</sup> C. Hansch, R. M. Muir, T. Fujita, P. P. Maloney, F. Geiger, M. Streich, *J. Am. Chem. Soc.* **1963**, *85*, 2817-2824.

<sup>10</sup> C. Bluestein, H. N. Posmanter, *Anal. Chem.* **1966**, *38*, 1865-1869.

<sup>11</sup> T. Fujita, J. Iwasa, C. Hansch, *J. Am. Chem. Soc.* **1964**, *86*, 5175-5180.

### 8. Detailed experimental data for the log*P* determinations ( $\rho_{\text{oct}}$ and $\rho_{\text{wat}}$ values for each experiment) (Table SI13)

Unless indicated, the general procedure as detailed above was followed (O1P centered; SW: 300 ppm; D1: oct 30 sec; wat: 60 sec; SR: 295.14 ppm; NMR machine: 400-3)

(TFE was used as primary reference; 4,4,4-trifluorobutan-1-ol (TB), 2-fluoroethanol (FE) and 2-fluorophenol were also used as reference for some cases)

| Compound                                                                            | Nr | Experiment (octanol/water) | $\rho_{\text{oct}}/\rho_{\text{wat}}$ | log <i>P</i> | Average log <i>P</i> | error              |
|-------------------------------------------------------------------------------------|----|----------------------------|---------------------------------------|--------------|----------------------|--------------------|
| <b>8.1. Ethanol series</b>                                                          |    |                            |                                       |              |                      |                    |
| 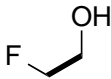   | 1  | au0814zw2/<br>au0814zw3    | 0.0832/<br>1.0625                     | -0.746       | -0.75                | -0.746<br>(±0.003) |
|                                                                                     |    | au2614zw8/<br>au2614zw9    | 0.1102/<br>1.4167                     | -0.749       |                      |                    |
|                                                                                     |    | au2614zw10/<br>au2614zw11  | 0.1040/<br>1.3137                     | -0.741       |                      |                    |
|    | 2  | nv1014zw1/<br>nv1014zw2    | 0.4596/<br>2.0203                     | -0.283       | -0.29                | +0.285<br>(±0.001) |
|                                                                                     |    | nv1014zw3/<br>nv1014zw4    | 0.4445/<br>1.9680                     | -0.286       |                      |                    |
|                                                                                     |    | nv1014zw5/<br>nv1014zw6    | 0.3238/<br>1.4323                     | -0.286       |                      |                    |
| <b>8.2. 2-Propanol series</b>                                                       |    |                            |                                       |              |                      |                    |
|  | 5  | nv2014zw3/<br>nv2014zw4    | 0.8682/<br>4.4354                     | -0.348       | -0.35                | +0.346<br>(±0.004) |
|                                                                                     |    | nv2014zw5/<br>nv2014zw6    | 0.8193/<br>4.1163                     | -0.341       |                      |                    |
|                                                                                     |    | nv2014zw7/<br>nv2014zw8    | 0.9956/<br>5.0887                     | -0.349       |                      |                    |
|  | 4  | nv1114zw1/<br>nv1114zw2    | 0.2925/<br>1.7780                     | -0.424       | -0.42                | -0.421<br>(±0.003) |
|                                                                                     |    | nv1114zw3/<br>nv1114zw4    | 0.2469/<br>1.4886                     | -0.420       |                      |                    |
|                                                                                     |    | nv1114zw5/<br>nv1114zw6    | 0.2773/<br>1.6622                     | -0.418       |                      |                    |
|  | 6  | jy0315zw5/<br>jy0315zw6    | 1.2375/<br>0.5507                     | +0.712       | +0.71                | +0.715<br>(±0.003) |
|                                                                                     |    | jy0315zw7/<br>jy0315zw8    | 1.2811/<br>0.5620                     | +0.718       |                      |                    |
|                                                                                     |    | jy0315zw9/<br>jy0315zw10   | 1.2551/<br>0.5551                     | +0.714       |                      |                    |
|  | 7  | my3015zw5/<br>my3015zw6    | 5.8692/<br>0.2765                     | +1.687       | +1.69                | +1.694<br>(±0.005) |
|                                                                                     |    | my3015zw7/<br>my3015zw8    | 4.5478/<br>0.2081                     | +1.700       |                      |                    |
|                                                                                     |    | my3015zw9/<br>my3015zw10   | 4.6120/<br>0.2136                     | +1.694       |                      |                    |

| Compound                      | Nr | Experiment<br>(octanol/water) | $\rho_{\text{oct}}/\rho_{\text{wat}}$ | $\log P$ | Average<br>$\log P$  | error              |
|-------------------------------|----|-------------------------------|---------------------------------------|----------|----------------------|--------------------|
| <b>8.3. 1-Propanol series</b> |    |                               |                                       |          |                      |                    |
|                               | 8  | nv2914zw13/<br>nv2914zw14     | 5.5538/<br>1.9083                     | -0.286   | -0.29 <sup>[a]</sup> | -0.287<br>(±0.001) |
|                               |    | nv2914zw15/<br>nv2914zw16     | 3.3986/<br>1.1753                     | -0.289   |                      |                    |
|                               |    | nv2914zw17/<br>nv2914zw18     | 3.3499/<br>1.1540                     | -0.287   |                      |                    |
|                               | 9  | nv1414zw1/<br>nv1414zw2       | 3.3434/<br>1.1035                     | -0.269   | -0.26 <sup>[a]</sup> | -0.260<br>(±0.007) |
|                               |    | nv1414zw3/<br>nv1414zw4       | 3.4050/<br>1.0885                     | -0.255   |                      |                    |
|                               |    | nv1414zw5/<br>nv1414zw6       | 3.0305/<br>0.9685                     | -0.255   |                      |                    |
|                               | 10 | ma1715zw3/<br>ma1715zw4       | 0.1111/<br>0.2358                     | +0.033   | +0.04                | +0.038<br>(±0.004) |
|                               |    | ma1715zw5/<br>ma1715zw6       | 0.1112/<br>0.2345                     | +0.036   |                      |                    |
|                               |    | ma1715zw7/<br>ma1715zw8       | 0.1128/<br>0.2338                     | +0.043   |                      |                    |
|                               | 11 | nv1314zw1/<br>nv1314zw2       | 0.3455/<br>0.6107                     | +0.113   | +0.11                | +0.110<br>(±0.003) |
|                               |    | nv1314zw3/<br>nv1314zw4       | 0.4166/<br>0.7460                     | +0.107   |                      |                    |
|                               |    | nv1314zw5/<br>nv1314zw6       | 0.4318/<br>0.7654                     | +0.111   |                      |                    |
|                               | 12 | ma1115zw3/<br>ma1115zw4       | 1.0328/<br>0.9138                     | +0.413   | +0.41                | +0.414<br>(±0.001) |
|                               |    | ma1115zw5/<br>ma1115zw6       | 1.3310/<br>1.1738                     | +0.415   |                      |                    |
|                               |    | ma1115zw7/<br>ma1115zw8       | 1.5206/<br>1.3375                     | +0.416   |                      |                    |
|                               | 13 | oc0214zw1/<br>oc0214zw2       | 2.1983/<br>0.3163                     | +1.202   | +1.20                | 1.200<br>(±0.001)  |
|                               |    | oc0214zw3/<br>oc0214zw4       | 1.9761/<br>0.2854                     | +1.200   |                      |                    |
|                               |    | oc0214zw5/<br>oc0214zw6       | 2.3148/<br>0.3352                     | +1.199   |                      |                    |

<sup>[a]</sup> Reference compound: FE

| Compound                                                                            | Nr | Experiment<br>(octanol/water) | $\rho_{\text{oct}}/\rho_{\text{wat}}$ | $\log P$ | Average<br>$\log P$  | error                     |
|-------------------------------------------------------------------------------------|----|-------------------------------|---------------------------------------|----------|----------------------|---------------------------|
| <b>8.4. tert-Butanol series</b>                                                     |    |                               |                                       |          |                      |                           |
| 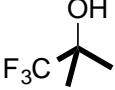   | 14 | nv2314zw3/<br>nv2314zw4       | 5.9389/<br>1.2568                     | +1.034   | +1.03                | +1.028<br>( $\pm 0.004$ ) |
|                                                                                     |    | nv2314zw5/<br>nv2314zw6       | 9.1209/<br>1.9688                     | +1.026   |                      |                           |
|                                                                                     |    | nv2314zw7/<br>nv2314zw8       | 5.4572/<br>1.1808                     | +1.025   |                      |                           |
|    | 15 | ju0515zw9/<br>ju0515zw10      | 5.7536/<br>0.1164                     | +2.054   | +2.08                | +2.080<br>( $\pm 0.019$ ) |
|                                                                                     |    | ju0515zw11/<br>ju0515zw12     | 5.8469/<br>0.1069                     | +2.098   |                      |                           |
|                                                                                     |    | ju0515zw13/<br>ju0515zw14     | 6.0948/<br>0.1137                     | +2.089   |                      |                           |
|                                                                                     |    |                               |                                       |          |                      |                           |
| <b>8.5. 2-Butanol series</b>                                                        |    |                               |                                       |          |                      |                           |
|   | 16 | ma1915zw1/<br>ma1915zw2       | 0.1211/<br>0.2326                     | +0.077   | +0.08                | +0.084<br>( $\pm 0.007$ ) |
|                                                                                     |    | ma1915zw3/<br>ma1915zw4       | 0.1237/<br>0.2348                     | +0.082   |                      |                           |
|                                                                                     |    | ma1915zw5/<br>ma1915zw6       | 0.1282/<br>0.2366                     | +0.094   |                      |                           |
|  | 17 | ma2815zw3/<br>ma2815zw4       | 0.7442/<br>0.6484                     | +0.420   | +0.42                | +0.417<br>( $\pm 0.002$ ) |
|                                                                                     |    | ma2815zw5/<br>ma2815zw6       | 0.7388/<br>0.6496                     | +0.416   |                      |                           |
|                                                                                     |    | ma2815zw7/<br>ma2815zw8       | 0.7412/<br>0.6546                     | +0.414   |                      |                           |
|                                                                                     |    |                               |                                       |          |                      |                           |
|  | 18 | jy0315zw11/<br>jy0315zw12     | 0.7712/<br>0.3327                     | +0.725   | +0.72                | +0.721<br>( $\pm 0.003$ ) |
|                                                                                     |    | jy0315zw13/<br>jy0315zw14     | 0.7502/<br>0.3265                     | +0.721   |                      |                           |
|                                                                                     |    | jy0315zw15/<br>jy0315zw16     | 0.7634/<br>0.3353                     | +0.717   |                      |                           |
|                                                                                     |    |                               |                                       |          |                      |                           |
|  | 19 | ja0615zw3/<br>ja0615zw4       | 2.2187/<br>1.5831                     | +1.057   | +1.05 <sup>[a]</sup> | +1.054<br>( $\pm 0.003$ ) |
|                                                                                     |    | ja0615zw5/<br>ja0615zw6       | 1.4520/<br>1.0433                     | +1.054   |                      |                           |
|                                                                                     |    | ja0615zw7/<br>ja0615zw8       | 1.7014/<br>1.2318                     | +1.050   |                      |                           |
|                                                                                     |    |                               |                                       |          |                      |                           |
|  | 20 | ap2515zw5/<br>ap2515zw6       | 4.5737/<br>0.3075                     | +1.532   | +1.53                | +1.530<br>( $\pm 0.002$ ) |
|                                                                                     |    | ap2515zw7/<br>ap2515zw8       | 4.5465/<br>0.3072                     | +1.530   |                      |                           |
|                                                                                     |    | ap2515zw9/<br>ap2515zw10      | 4.4489/<br>0.3018                     | +1.529   |                      |                           |
|                                                                                     |    |                               |                                       |          |                      |                           |

<sup>[a]</sup> Reference compound: 4,4,4-trifluoro-1-butanol (TB,  $\log P$ : +0.91<sup>EXP</sup>).

| Compound                                                                            | Nr | Experiment<br>(octanol/water) | $\rho_{\text{oct}}/\rho_{\text{wat}}$ | $\log P$ | Average<br>$\log P$ | error              |
|-------------------------------------------------------------------------------------|----|-------------------------------|---------------------------------------|----------|---------------------|--------------------|
| <b>8.6. 1-Butanol series</b>                                                        |    |                               |                                       |          |                     |                    |
| 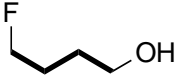   | 21 | nv1714zw3/<br>nv1714zw4       | 1.5512/<br>2.8742                     | +0.092   | +0.09               | +0.090<br>(±0.002) |
|                                                                                     |    | nv1714zw5/<br>nv1714zw6       | 1.4427/<br>2.6988                     | +0.088   |                     |                    |
|                                                                                     |    | nv1714zw7/<br>nv1714zw8       | 1.5758/<br>2.9372                     | +0.090   |                     |                    |
|    | 22 | my3015zw11/<br>my3015zw12     | 0.4122/<br>0.6449                     | +0.166   | +0.17               | +0.173<br>(±0.006) |
|                                                                                     |    | my3015zw13/<br>my3015zw14     | 0.4144/<br>0.6279                     | +0.180   |                     |                    |
|                                                                                     |    | my3015zw15/<br>my3015zw16     | 0.4146/<br>0.6379                     | +0.173   |                     |                    |
|    | 23 | nv2314zw9/<br>nv2314zw10      | 0.8687/<br>0.2406                     | +0.918   | +0.91               | +0.910<br>(±0.005) |
|                                                                                     |    | nv2314zw11/<br>nv2314zw12     | 1.0628/<br>0.3035                     | +0.904   |                     |                    |
|                                                                                     |    | nv2314zw13/<br>nv2314zw14     | 0.9520/<br>0.2691                     | +0.909   |                     |                    |
|                                                                                     |    | nv2314zw15/<br>nv2314zw16     | 1.4533/<br>0.4124                     | +0.907   |                     |                    |
|  | 24 | nv2614zw1/<br>nv2614zw2       | 7.2581/<br>0.8504                     | +1.291   | +1.30               | +1.298<br>(0.005)  |
|                                                                                     |    | nv2614zw3/<br>nv2614zw4       | 9.8785/<br>1.1251                     | +1.303   |                     |                    |
|                                                                                     |    | nv2614zw5/<br>nv2614zw6       | 9.7072/<br>1.1159                     | +1.299   |                     |                    |
|  | 25 | nv2214zw9/<br>nv2214zw10      | 15.3820/<br>0.3601                    | +1.991   | +1.98               | +1.976<br>(±0.015) |
|                                                                                     |    | nv2214zw11/<br>nv2214zw12     | 26.3642/<br>0.6361                    | +1.977   |                     |                    |
|                                                                                     |    | nv2214zw13/<br>nv2214zw14     | 30.1285/<br>0.7556                    | +1.961   |                     |                    |



| Compound                                                                            | Nr  | Experiment<br>(octanol/water) | $\rho_{\text{oct}}/\rho_{\text{wat}}$ | $\log P$ | Average<br>$\log P$ | error              |
|-------------------------------------------------------------------------------------|-----|-------------------------------|---------------------------------------|----------|---------------------|--------------------|
| <b>8.7. 2-Pentanol series</b>                                                       |     |                               |                                       |          |                     |                    |
| 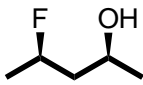   | 26  | dc1614zw3/<br>dc1614zw4       | 0.3660/<br>0.2804                     | +0.476   | +0.48               | +0.477<br>(±0.001) |
|                                                                                     |     | dc1614zw5/<br>dc1614zw6       | 0.4450/<br>0.3407                     | +0.476   |                     |                    |
|                                                                                     |     | dc1614zw7/<br>dc1614zw8       | 0.4663/<br>0.3556                     | +0.478   |                     |                    |
|    | 27  | dc1414zw1/<br>dc1414zw2       | 0.6245/<br>0.3847                     | +0.570   | +0.57               | +0.569<br>(±0.003) |
|                                                                                     |     | dc1414zw3/<br>dc1414zw4       | 0.4612/<br>0.2880                     | +0.564   |                     |                    |
|                                                                                     |     | dc1414zw5/<br>dc1414zw6       | 0.7161/<br>0.4398                     | +0.572   |                     |                    |
|    | 28  | ma2215zw1/<br>ma2215zw2       | 0.6733/<br>0.3383                     | +0.659   | +0.66               | +0.662<br>(±0.003) |
|                                                                                     |     | ma2315zw1/<br>ma2315zw2       | 0.6715/<br>0.3316                     | +0.666   |                     |                    |
|                                                                                     |     | ma2315zw3/<br>ma2315zw4       | 0.6782/<br>0.3394                     | +0.661   |                     |                    |
|  | 29  | my1615zw5/<br>my1615zw6       | 1.5849/<br>0.0535                     | +1.832   | +1.82               | +1.817<br>(±0.011) |
|                                                                                     |     | my1615zw7/<br>my1615zw8       | 1.5285/<br>0.0538                     | +1.813   |                     |                    |
|                                                                                     |     | my1615zw9/<br>my1615zw10      | 1.5499/<br>0.0557                     | +1.804   |                     |                    |
|  | SI1 | ap2515zw23/<br>ap2515zw24     | 2.7176/<br>0.02402                    | +2.414   | +2.41               | +2.409<br>(±0.012) |
|                                                                                     |     | ap2515zw25/<br>ap2515zw26     | 2.8090/<br>0.02438                    | +2.422   |                     |                    |
|                                                                                     |     | ap2515zw27/<br>ap2515zw28     | 2.7523/<br>0.02553                    | +2.393   |                     |                    |
| <b>8.8. Neopentyl alcohol series</b>                                                |     |                               |                                       |          |                     |                    |
|  | SI3 | ma2715zw7/<br>ma2715zw8       | 0.3694/<br>0.1264                     | +0.826   | +0.80               | +0.796<br>(±0.021) |
|                                                                                     |     | ma2715zw9/<br>ma2715zw10      | 0.2208/<br>0.0828                     | +0.786   |                     |                    |
|                                                                                     |     | ma2715zw11/<br>ma2715zw12     | 0.3175/<br>0.1217                     | +0.776   |                     |                    |

| Compound                                                                            | Nr | Experiment<br>(octanol/water) | $\rho_{\text{oct}}/\rho_{\text{wat}}$ | $\log P$ | Average<br>$\log P$ | error              |
|-------------------------------------------------------------------------------------|----|-------------------------------|---------------------------------------|----------|---------------------|--------------------|
| <b>8.9. 1-Pentanol series</b>                                                       |    |                               |                                       |          |                     |                    |
|    | 30 | my3115zw3/<br>my3115zw4       | 1.3428/<br>0.9210                     | +0.524   | +0.52               | +0.524<br>(±0.002) |
|                                                                                     |    | my3115zw5/<br>my3115zw6       | 1.3407/<br>0.9133                     | +0.527   |                     |                    |
|                                                                                     |    | my3115zw7/<br>my3115zw8       | 1.3500/<br>0.9303                     | +0.522   |                     |                    |
|    | 31 | my2315zw5/<br>my2315zw6       | 0.5138/<br>0.3580                     | +0.517   | +0.52               | +0.522<br>(±0.004) |
|                                                                                     |    | my2315zw7/<br>my2315zw8       | 0.5189/<br>0.3573                     | +0.522   |                     |                    |
|                                                                                     |    | my2315zw9/<br>my2315zw10      | 0.5237/<br>0.3575                     | +0.526   |                     |                    |
|    | 32 | my0915zw5/<br>my0915zw6       | 0.4653/<br>0.2071                     | +0.712   | +0.71               | +0.708<br>(±0.005) |
|                                                                                     |    | my0915zw7/<br>my0915zw8       | 0.4598/<br>0.2098                     | +0.701   |                     |                    |
|                                                                                     |    | my0915zw9/<br>my0915zw10      | 0.4674/<br>0.2078                     | +0.712   |                     |                    |
|   | 33 | ju1215zw9/<br>ju1215zw10      | 0.7883/<br>0.2427                     | +0.872   | +0.87               | +0.868<br>(±0.003) |
|                                                                                     |    | ju1215zw11/<br>ju1215zw12     | 0.8108/<br>0.2512                     | +0.869   |                     |                    |
|                                                                                     |    | ju1215zw13/<br>ju1215zw14     | 0.7916/<br>0.2479                     | +0.864   |                     |                    |
|                                                                                     |    | ju0515zw21/<br>ju0515zw22     | 0.5401/<br>0.1322                     | +0.971   |                     |                    |
|  | 34 | ju0515zw23/<br>ju0515zw24     | 0.5476/<br>0.1326                     | +0.976   | +0.97               | +0.974<br>(±0.002) |
|                                                                                     |    | ju0515zw25/<br>ju0515zw26     | 0.5373/<br>0.1307                     | +0.974   |                     |                    |
|                                                                                     |    | nv2214zw3/<br>nv2214zw4       | 4.4606/<br>0.6154                     | +1.220   |                     |                    |
|  | 35 | nv2214zw5/<br>nv2214zw6       | 4.2519/<br>0.5881                     | +1.219   | +1.22               | +1.222<br>(0.004)  |
|                                                                                     |    | nv2214zw7/<br>nv2214zw8       | 3.0699/<br>0.4159                     | +1.228   |                     |                    |
|                                                                                     |    | ap2515zw11/<br>ap2515zw12     | 3.3028/<br>0.1425                     | +1.725   |                     |                    |
|  | 36 | ap2515zw13/<br>ap2515zw14     | 3.1018/<br>0.1356                     | +1.719   | +1.72               | +1.720<br>(±0.004) |
|                                                                                     |    | ap2515zw15/<br>ap2515zw16     | 3.3643/<br>0.1480                     | +1.717   |                     |                    |

**8.10. 2-methyl-2-pentanol series**

|                                                                                     |     |                           |                   |        |       |                    |
|-------------------------------------------------------------------------------------|-----|---------------------------|-------------------|--------|-------|--------------------|
| 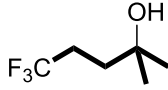 | SI2 | ap2515zw17/<br>ap2515zw18 | 2.7049/<br>0.1875 | +1.519 | +1.52 | +1.519<br>(±0.002) |
|                                                                                     |     | ap2515zw19/<br>ap2515zw20 | 2.6849/<br>0.1848 | +1.522 |       |                    |
|                                                                                     |     | ap2515zw21/<br>ap2515zw22 | 2.7060/<br>0.1887 | +1.517 |       |                    |

| Compound                                                                          | Nr | Experiment<br>(octanol/water) | $\rho_{\text{oct}}/\rho_{\text{wat}}$ | $\log P$ | Average<br>$\log P$  | error              |
|-----------------------------------------------------------------------------------|----|-------------------------------|---------------------------------------|----------|----------------------|--------------------|
| 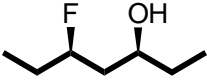 | 37 | dc0814zw3/<br>dc0814zw4       | 0.3801/<br>0.0808                     | +1.582   | +1.58 <sup>[a]</sup> | +1.584<br>(±0.005) |
|                                                                                   |    | dc0814zw5/<br>dc0814zw6       | 0.5037/<br>0.1049                     | +1.591   |                      |                    |
|                                                                                   |    | dc0814zw7/<br>dc0814zw8       | 0.4058/<br>0.0867                     | +1.580   |                      |                    |
|  | 38 | dc1114zw1/<br>dc1114zw2       | 1.0099/<br>0.1686                     | +1.687   | +1.71 <sup>[a]</sup> | +1.710<br>(±0.017) |
|                                                                                   |    | dc1114zw3/<br>dc1114zw4       | 0.6804/<br>0.1051                     | +1.721   |                      |                    |
|                                                                                   |    | dc1114zw5/<br>dc1114zw6       | 0.6872/<br>0.1056                     | +1.723   |                      |                    |

<sup>[a]</sup> Reference compound: 4,4,4-trifluoro-1-butanol (**TB**,  $\log P$ : +0.91<sup>EXP</sup>)

### 8.12. 1,4-Butanediol series

|                                                                                     |    |                         |                   |        |                      |                    |
|-------------------------------------------------------------------------------------|----|-------------------------|-------------------|--------|----------------------|--------------------|
| 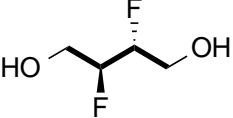   | 39 | nv2714zw1/<br>nv2714zw2 | 1.5892/<br>2.8679 | -1.006 | -1.01 <sup>[a]</sup> | -1.009<br>(±0.003) |
|                                                                                     |    | nv2714zw3/<br>nv2714zw4 | 1.4013/<br>2.5419 | -1.009 |                      |                    |
|                                                                                     |    | nv2714zw5/<br>nv2714zw6 | 0.7770/<br>1.4206 | -1.012 |                      |                    |
|  | 40 | nv2914zw3/<br>nv2914zw4 | 1.5649/<br>2.5229 | -0.957 | -0.97 <sup>[a]</sup> | -0.968<br>(±0.009) |
|                                                                                     |    | nv2914zw5/<br>nv2914zw6 | 1.3398/<br>2.2144 | -0.968 |                      |                    |
|                                                                                     |    | nv2914zw7/<br>nv2914zw8 | 1.0521/<br>1.7864 | -0.980 |                      |                    |
|  | 41 | dc0314zw1/<br>dc0314zw2 | 1.1289/<br>3.4162 | -0.121 | -0.11                | -0.109<br>(±0.009) |
|                                                                                     |    | dc0314zw3/<br>dc0314zw4 | 1.6429/<br>4.8079 | -0.106 |                      |                    |
|                                                                                     |    | dc0314zw5/<br>dc0314zw6 | 0.8021/<br>2.3130 | -0.100 |                      |                    |

<sup>[a]</sup> Reference compound: FE.

### 8.13. Additional compound: o-fluorophenol

|                                                                                     |     |                           |                   |        |       |                    |
|-------------------------------------------------------------------------------------|-----|---------------------------|-------------------|--------|-------|--------------------|
| 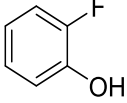 | SI4 | ju1215zw15/<br>ju1215zw16 | 1.2149/<br>0.0554 | +1.701 | +1.70 | +1.696<br>(±0.004) |
|                                                                                     |     | ju1215zw17/<br>ju1215zw18 | 1.1761/<br>0.0544 | +1.695 |       |                    |
|                                                                                     |     | ju1215zw19/<br>ju1215zw20 | 1.2282/<br>0.0571 | +1.693 |       |                    |

| Compound                                                                           | Nr        | Experiment<br>(octanol/water)                           | $\rho_{\text{oct}}/\rho_{\text{wat}}$ | $\log P$ | Average<br>$\log P$ | error              |
|------------------------------------------------------------------------------------|-----------|---------------------------------------------------------|---------------------------------------|----------|---------------------|--------------------|
| <b>8.14. 4-<i>tert</i>-butylcyclohexanol series<sup>[a]</sup></b>                  |           |                                                         |                                       |          |                     |                    |
| 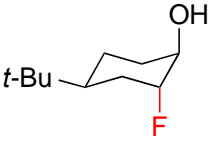  | <b>44</b> | ma2415zw3/ <sup>[b]</sup><br>ap0215njwz1 <sup>[c]</sup> | 0.8521/<br>0.02657                    | +3.206   | -                   | -                  |
|   | <b>45</b> | ap0115zw3/ <sup>[d]</sup><br>ap0115zw4                  | 2.2293/<br>0.6523                     | +2.234   | +2.23               | +2.229<br>(±0.005) |
|                                                                                    |           | ap0115zw5/<br>ap0115zw6                                 | 2.1797/<br>0.6533                     | +2.223   |                     |                    |
|                                                                                    |           | ap0115zw3/<br>my0115njwz1 <sup>[e]</sup>                | 2.2293/<br>0.6582                     | +2.230   |                     |                    |
|   | <b>43</b> | ma2715njwz1/ <sup>[f]</sup><br>ma2715njwz2              | 2.1788/<br>0.2689                     | +2.609   | +2.61               | +2.608<br>(±0.009) |
|                                                                                    |           | ma3115zw3/<br>ma3115zw4                                 | 2.2142/<br>0.2666                     | +2.619   |                     |                    |
|                                                                                    |           | ma2815zw9/<br>ma2815zw10                                | 2.0216/<br>0.2563                     | +2.597   |                     |                    |
|  | <b>42</b> | nv1214zw3/<br>nv1214zw4                                 | 1.4736/<br>0.1738                     | +2.628   | +2.63               | +2.630<br>(±0.002) |
|                                                                                    |           | nv1214zw3/<br>ja3015njwz1 <sup>[g]</sup>                | 1.4736/<br>0.1726                     | +2.631   |                     |                    |

<sup>[a]</sup> Reference: 2-fluorophenol ( $\log P$ : +1.70<sup>EXP</sup>);

<sup>[b]</sup> NS: 64; D1: 30 sec; SW: 100 ppm; centered O1P; NMR: 400-3;

<sup>[c]</sup> NS: 32768; D1: 15 sec; SW: 100 ppm; centered O1P; NMR: 400-2;

<sup>[d]</sup> SW for ap0115zw3-6 and my0115njwz1: 100 ppm;

<sup>[e]</sup> NMR tube of ap0115zw4 was re-run on NMR machine 400-2 with extended NS of 4096;

<sup>[f]</sup> NMR tube of ma3115zw3/4 were re-run on NMR machine 400-2 with extended NS of 4096; SW for ma2715njwz1/2 and ma3115zw3/4: 100 ppm;

<sup>[g]</sup> NMR tube of nv1214zw4 was re-run on NMR machine 400-2 with extended NS of 4096 and SW 100 ppm.

| Compound                                                                            | Nr | Experiment<br>(octanol/water)                             | $\rho_{\text{oct}}/\rho_{\text{wat}}$ | $\log P$ | Average<br>$\log P$ | error                     |
|-------------------------------------------------------------------------------------|----|-----------------------------------------------------------|---------------------------------------|----------|---------------------|---------------------------|
| 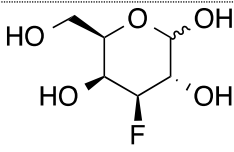   | 46 | ju2614njwzw5/<br>ju2614njwzw6 <sup>12</sup>               | 0.0371/<br>1.9271 <sup>13</sup>       | -2.465   | -                   | -                         |
|    | 47 | ju2614njwzw3/<br>ju2614njwzw4 <sup>14</sup>               | 0.0550/<br>2.3122 <sup>15</sup>       | -2.374   | -                   | -                         |
|    | 48 | se1115njwzw2/<br>se1115njwzw1 <sup>16</sup>               | 0.0992/<br>3.9888                     | -2.354   | -2.36               | -2.355<br>( $\pm 0.001$ ) |
|                                                                                     |    | oc0215njwzw1/<br>se3015njwzw1 <sup>17</sup>               | 0.1182/<br>4.7741                     | -2.356   |                     |                           |
|   | 49 | ju2614njwzw1/ <sup>18</sup><br>ju2614njwzw2 <sup>19</sup> | 0.0792/<br>2.2992                     | -2.213   | -                   | -                         |
|  | 50 | ju2614njwzw7/<br>ju2614njwzw8 <sup>20</sup>               | 0.1208/<br>2.7976                     | -2.114   | -                   | -                         |
|  | 51 | ju22z4zw3/<br>ju2214zw4 <sup>21</sup>                     | 0.0755/<br>4.8445                     | -1.447   | -                   | -                         |

<sup>12</sup> For both oct and wat sample: D1: 15 sec; O1P: -150 ppm; NS: oct 3296; wat 2329; reference: **FE**;

<sup>13</sup> For data reprocessing of ju2614njwzw6: no zero-filling and LB value 0.15 for WF (exponential) as it was difficult to obtain good baseline with standard settings (doublezero-filling and LB value 2);

<sup>14</sup> For both oct and wat sample: D1: 15 sec; O1P: -150 ppm; NS: oct 3296; wat 2687; reference: **FE**;

<sup>15</sup> For data reprocessing of ju2614njwzw4: no zero-filling and LB value 0.15 for WF (exponential) as it was difficult to obtain good baseline with standard settings (doublezero-filling and LB value 2);

<sup>16</sup> For both oct and wat sample: D1: 15 sec; O1P: -230 ppm; NS: oct 4647; wat 512; Commercial compound was purified by flash chromatography and then used for  $\log P$  partition. The sample after partition equilibrium was centrifuged for 4 times with each duration of 1 hr at 500 rpm to obtain clear water and octanol layer for NMR sample preparation; reference: **FE**;

<sup>17</sup> For both oct and wat sample: D1: 15 sec; O1P: -230 ppm; NS: oct 9216; wat 512; reference: **FE**;

<sup>18</sup> For both oct and wat sample: D1: 15 sec; O1P: -150 ppm; NS: oct 3296; wat 1744; reference: **FE**;

<sup>19</sup> For data reprocessing of ju2614njwzw2: no zero-filling and LB value 0.15 for WF (exponential) as it was difficult to obtain good baseline with standard settings (doublezero-filling and LB value 2);

<sup>20</sup> For both oct and wat sample: D1: 15 sec; O1P: -150 ppm; NS: oct 3296; wat 427; reference: **FE**;

<sup>21</sup> For both oct and wat sample: D1: 50 sec; O1P -100 ppm; reference: **TFE**;

|                                                                                    |           |                                         |                                       |          |                                        |                    |
|------------------------------------------------------------------------------------|-----------|-----------------------------------------|---------------------------------------|----------|----------------------------------------|--------------------|
| 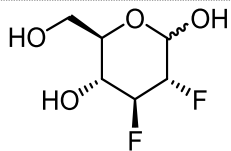  | 52        | jy0814zw4/<br>jy0814zw5 <sup>22</sup>   | 0.8113/<br>1.8759                     | -1.114   | -                                      | -                  |
| <b>Compound</b>                                                                    | <b>Nr</b> | <b>Experiment<br/>(octanol/water)</b>   | $\rho_{\text{oct}}/\rho_{\text{wat}}$ | $\log P$ | <b>Average<br/><math>\log P</math></b> | <b>error</b>       |
|   | 53        | my0915zw11/ <sup>23</sup><br>my0915zw12 | 0.1232/<br>1.0571                     | -0.574   | -0.58                                  | -0.576<br>(±0.005) |
|                                                                                    |           | my0915zw13/<br>my0915zw14               | 0.1186/<br>1.0156                     | -0.573   |                                        |                    |
|                                                                                    |           | my0915zw15/<br>my0915zw16               | 0.1270/<br>1.1141                     | -0.583   |                                        |                    |
|   | 54        | ju2314zw1/ <sup>24</sup><br>ju2314zw2   | 1.9975/<br>9.4638                     | -0.316   | -0.32                                  | -                  |
|  | 55        | nv2514zw1/<br>nv2514zw2                 | 1.2117/<br>0.3190                     | -0.170   | -0.17 <sup>25</sup>                    | -                  |

<sup>22</sup> For both oct and wat sample D1: 50 sec; O1P: -100 ppm; reference: **FE**.

<sup>23</sup> Reference: **TFE**;

<sup>24</sup> O1P: -100 ppm; D1: 50 sec for both oct and wat sample; reference: **TFE**;

<sup>25</sup> Very low S/N ratios due to the fluorine coupling; reference: **FE**;

### 9. Comparison of $\text{clog}P$ with experimental $\text{log}P$ (Table SI14)

The  $\text{log}P$  values obtained by our method are compared with two calculated  $\text{log}P$  values.

|                                             |  |
|---------------------------------------------|--|
| Difference of $<0.10 \text{ log}P$          |  |
| Difference $0.10\text{--}0.49 \text{ log}P$ |  |
| Difference $0.50\text{--}0.75 \text{ log}P$ |  |
| Difference $>0.75 \text{ log}P$             |  |

| Compound                                                                            | Nr | $\text{log}P_{\text{exp}}$ | $\text{clog}P^{\text{[a]}}$ | $\Delta\text{log}P$ | $\text{milog}P^{\text{[b]}}$ | $\Delta\text{log}P$ |
|-------------------------------------------------------------------------------------|----|----------------------------|-----------------------------|---------------------|------------------------------|---------------------|
| 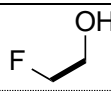   | 1  | -0.75                      | -0.32                       | <b>+0.43</b>        | -0.02                        | <b>+0.73</b>        |
|    | 2  | -0.29                      | -0.05                       | <b>+0.24</b>        | +0.25                        | <b>+0.54</b>        |
|    | 3  | +0.36                      | +0.44                       | <b>+0.08</b>        | +0.61                        | <b>+0.25</b>        |
|    | 5  | -0.35                      | +0.10                       | <b>+0.45</b>        | +0.34                        | <b>+0.69</b>        |
|   | 4  | -0.42                      | -0.06                       | <b>+0.36</b>        | +0.26                        | <b>+0.68</b>        |
|  | 6  | +0.70                      | +0.85                       | <b>+0.15</b>        | +0.97                        | <b>+0.27</b>        |
|  | 7  | +1.69                      | +1.45                       | <b>+0.24</b>        | +1.52                        | <b>+0.17</b>        |
|  | 9  | -0.26                      | -0.26                       | <b>0.00</b>         | +0.25                        | <b>+0.51</b>        |
|  | 8  | -0.29                      | +0.10                       | <b>+0.39</b>        | +0.34                        | <b>+0.63</b>        |
|  | 10 | +0.04                      | +0.22                       | <b>+0.18</b>        | +0.52                        | <b>+0.48</b>        |
|  | 11 | +0.11                      | +0.20                       | <b>+0.09</b>        | +0.70                        | <b>+0.59</b>        |
|  | 12 | +0.41                      | +0.49                       | <b>+0.08</b>        | +0.88                        | <b>+0.47</b>        |
|  | 13 | +1.20                      | +1.14                       | <b>-0.06</b>        | +1.25                        | <b>+0.05</b>        |
|  | 14 | +1.03                      | +1.13                       | <b>+0.10</b>        | +1.42                        | <b>+0.39</b>        |
|  | 16 | +0.08                      | +0.16                       | <b>+0.08</b>        | +0.61                        | <b>+0.53</b>        |
|  | 17 | +0.42                      | +0.63                       | <b>+0.21</b>        | +0.88                        | <b>+0.46</b>        |

|                                                                                     |           |       |       |              |       |              |
|-------------------------------------------------------------------------------------|-----------|-------|-------|--------------|-------|--------------|
| 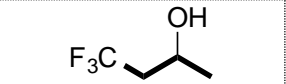   | <b>18</b> | +0.71 | +0.90 | <b>+0.19</b> | +1.24 | <b>+0.53</b> |
|    | <b>19</b> | +1.05 | +1.06 | <b>+0.01</b> | +1.61 | <b>+0.56</b> |
|    | <b>21</b> | +0.09 | +0.26 | <b>+0.17</b> | +0.52 | <b>+0.43</b> |
|    | <b>23</b> | +0.91 | +1.00 | <b>+0.09</b> | +1.15 | <b>+0.24</b> |
|    | <b>24</b> | +1.30 | +1.41 | <b>+0.11</b> | +1.52 | <b>+0.22</b> |
|    | <b>25</b> | +1.98 | +1.84 | <b>-0.14</b> | +1.89 | <b>-0.09</b> |
|    | <b>27</b> | +0.57 | +0.58 | <b>+0.01</b> | +0.97 | <b>+0.40</b> |
|    | <b>26</b> | +0.48 | +0.58 | <b>+0.10</b> | +0.97 | <b>+0.49</b> |
|   | <b>28</b> | +0.66 | +0.88 | <b>+0.22</b> | +1.33 | <b>+0.67</b> |
|  | <b>35</b> | +1.22 | +1.44 | <b>+0.22</b> | +1.65 | <b>+0.43</b> |
|  | <b>38</b> | +1.71 | +1.62 | <b>-0.09</b> | +1.98 | <b>+0.27</b> |
|  | <b>37</b> | +1.58 | +1.62 | <b>+0.04</b> | +1.98 | <b>+0.40</b> |
|  | <b>39</b> | -1.01 | -0.69 | <b>+0.32</b> | -0.38 | <b>+0.63</b> |
|  | <b>40</b> | -0.97 | -0.69 | <b>+0.28</b> | -0.38 | <b>+0.59</b> |
|  | <b>41</b> | -0.11 | +0.19 | <b>+0.30</b> | +0.33 | <b>+0.44</b> |
|  | <b>42</b> | +2.63 | +2.42 | <b>-0.21</b> | +2.70 | <b>+0.07</b> |
|  | <b>43</b> | +2.61 | +2.42 | <b>-0.19</b> | +2.70 | <b>-0.09</b> |
|  | <b>44</b> | +3.21 | +2.42 | <b>-0.79</b> | +2.70 | <b>-0.51</b> |



|                                                                                     |            |       |       |              |       |              |
|-------------------------------------------------------------------------------------|------------|-------|-------|--------------|-------|--------------|
| 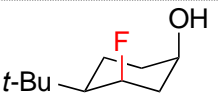   | <b>45</b>  | +2.23 | +2.11 | <b>-0.12</b> | +2.70 | <b>-0.47</b> |
|    | <b>46</b>  | -2.47 | -2.04 | <b>+0.43</b> | -2.15 | <b>+0.32</b> |
|    | <b>47</b>  | -2.37 | -2.04 | <b>+0.33</b> | -1.93 | <b>+0.44</b> |
|    | <b>48</b>  | -2.36 | -2.04 | <b>+0.32</b> | -1.71 | <b>+0.65</b> |
|    | <b>49</b>  | -2.21 | -2.04 | <b>+0.17</b> | -1.93 | <b>+0.28</b> |
|   | <b>50</b>  | -2.11 | -2.04 | <b>+0.07</b> | -1.93 | <b>-0.18</b> |
|  | <b>51</b>  | -1.45 | -1.14 | <b>-0.31</b> | -1.23 | <b>-0.22</b> |
|  | <b>52</b>  | -1.11 | -1.15 | <b>+0.04</b> | -1.22 | <b>+0.14</b> |
|  | <b>53</b>  | -0.58 | -0.27 | <b>+0.31</b> | -0.51 | <b>+0.07</b> |
|  | <b>54</b>  | -0.32 | -0.27 | <b>+0.05</b> | -0.51 | <b>-0.19</b> |
|  | <b>55</b>  | -0.17 | -0.26 | <b>-0.09</b> | -0.29 | <b>-0.12</b> |
|  | <b>SI1</b> | +2.41 | +2.25 | <b>-0.19</b> | +2.25 | <b>-0.19</b> |
|  | <b>SI2</b> | +1.52 | +1.69 | <b>+0.17</b> | +1.96 | <b>+0.44</b> |

|                                                                                   |            |       |       |              |       |              |
|-----------------------------------------------------------------------------------|------------|-------|-------|--------------|-------|--------------|
|  | <b>SI3</b> | +0.80 | +0.71 | <b>+0.09</b> | +1.14 | <b>+0.34</b> |
|  | <b>SI4</b> | +1.70 | +1.81 | <b>+0.11</b> | +1.83 | <b>+0.13</b> |

<sup>[a]</sup> Calculated  $\log P$  using Marvin Sketch 14.8.4.0;

<sup>[b]</sup>  $\text{milog} P$  calculated  $\log P$  using Molinspiration Cheminformatics on the Web:

<http://www.molinspiration.com/cgi-bin/properties>

### 10. Literature $\log P$ values for non-fluorinated alcohols (Table S115)

The first value was used to compare with the  $\log P$  of the fluorohydrins. In general, this is the  $\log P$  value catalogued by U.S. National Library of Medicine (NIH).

| Compound                                                                            | Nr      | $\log P$ (lit) ( <i>T</i> , method, analysis method [if reported])                                                                                                                                                        |
|-------------------------------------------------------------------------------------|---------|---------------------------------------------------------------------------------------------------------------------------------------------------------------------------------------------------------------------------|
|    | A       | -0.30 <sup>23</sup> ; -0.31 <sup>1</sup> ;<br>-0.15 <sup>2</sup> ;<br>-0.32 <sup>2</sup> (pH 6.00)                                                                                                                        |
|    | B       | +0.05 <sup>1,2</sup>                                                                                                                                                                                                      |
|    | C       | +0.30 <sup>2</sup> ;<br>+0.25 <sup>1</sup> ;                                                                                                                                                                              |
|    | D       | +0.37 <sup>2</sup> ;<br>+0.35 <sup>1</sup>                                                                                                                                                                                |
|    | E       | +0.76 <sup>2</sup> ;<br>+0.61 <sup>1</sup> ;<br>0.83 <sup>2</sup> ;<br>0.65 <sup>2</sup> ;                                                                                                                                |
|    | F       | +0.88 <sup>1,2</sup> ;<br>0.89 <sup>2</sup> ;<br>0.32 <sup>2</sup> ;                                                                                                                                                      |
|    | G       | +1.19 <sup>1</sup><br>1.16 <sup>2</sup> ;                                                                                                                                                                                 |
|    | H       | +1.51 <sup>1</sup><br>1.40 <sup>2</sup> ;                                                                                                                                                                                 |
|  | I       | +2.24 <sup>1</sup> ;                                                                                                                                                                                                      |
|  | J       | -0.83 <sup>1</sup> ;                                                                                                                                                                                                      |
|  | K       | +3.09 <sup>1</sup> ;                                                                                                                                                                                                      |
|  | L       | +3.02 <sup>1</sup> ;                                                                                                                                                                                                      |
|  | Glucose | -3.24 <sup>1</sup> ;<br>-2.84 <sup>4</sup> (5 °C, enzymatic)<br>-2.82 <sup>4</sup> (20 °C, enzymatic)<br>-3.10 <sup>4</sup> (25 °C, Radiochemical)<br>-3.02 <sup>4</sup> (LC)<br>-3.00 <sup>4</sup> /-3.24 <sup>4</sup> ; |
|  |         | +1.31 <sup>1</sup>                                                                                                                                                                                                        |

<sup>1</sup> $\log P$  data retrieved from U.S. National Library of Medicine online database: <http://chem.sis.nlm.nih.gov/chemidplus/>; partition and analysis method as well as temperature for  $\log P$  values are not provided from the database;

<sup>2</sup>Value in ref <sup>26</sup>. Partition and analysis method as well as temperature for  $\log P$  values are not provided in this book;

<sup>3</sup> Value in ref <sup>27</sup>. Method used for partition: shake-flask (method of Hansch and Muir<sup>28</sup>); method used for analysis: gas chromatography (method developed by Bluestein and Posmanter<sup>29</sup>; temperature for  $\log P$  measurement: not reported;

<sup>4</sup>Value in ref <sup>30</sup>;

<sup>26</sup> C. Hansch, A. Leo, in *Substituent constants for correlation analysis in chemistry and biology*. Wiley, 1979.

<sup>27</sup> E. O. Dillingham, R. W. Mast, G. E. Bass, J. Autian, *J. Pharm. Sci.* 1973, 62, 22-30.

<sup>28</sup> C. Hansch, R. M. Muir, T. Fujita, P. P. Maloney, F. Geiger, M. Streich, *J. Am. Chem. Soc.* 1963, 85, 2817-2824.

<sup>29</sup> C. Bluestein, H. N. Posmanter, *Anal. Chem.* 1966, 38, 1865-1869.

<sup>30</sup> M. F. Mazzobre, M. V. Roman, A. F. Mourelle, H. R. Corti, *Carbohydrate research*, 2005, 340, 1207-1211

## 11. List of commercially available and known compounds

### 11.1. Commercially available compounds

Fluorohydrins **1**, **2**, **4**, **5**, **6**, **7**, **8**, **9**, **11**, **12**, **13**, **14**, **15**, **18**, **19**, **20**, **21**, **23**, **24**, **25**, **35**, **36**, **41**, **SI1**, **SI2**, **SI4** were purchased from commercial suppliers and were checked by  $^1\text{H}$  and  $^{19}\text{F}$  NMR experiments. Carbohydrates **46**, **47**, **48**, **49** and **50** were purchased from commercial supplier. Carbohydrate **46** was purified by flash chromatography before log*P* experiment.

### 11.2. References to other compounds

The synthesis of **10**, **16**, **17**, **26**, **27**, **28**, **SI3** is reported.<sup>31</sup> The synthesis of **37** and **38** will be reported elsewhere. The synthesis of **39** is reported,<sup>32</sup> and the synthesis of **40** will be reported elsewhere. The synthesis of cyclic fluorohydrin **42**, **43**, **44**, **45** was reported in the literature.<sup>33</sup> The synthesis of **51** and **52** was reported in the literature.<sup>34</sup> The synthesis of **53** and **54** was reported in the literature.<sup>35</sup> Sugar derivative **55** was given by Prof David O'Hagan, and its synthesis is reported in the literature.<sup>36</sup>

## 12. Synthesis of novel compounds

### 12.1. Synthesis of 3-fluorobutan-1-ol (**22**)

#### 12.1.1. Synthesis of 3-fluorobut-1-yl benzoate (**SI6**) and 4-fluorobut-2-yl benzoate (**SI7**)

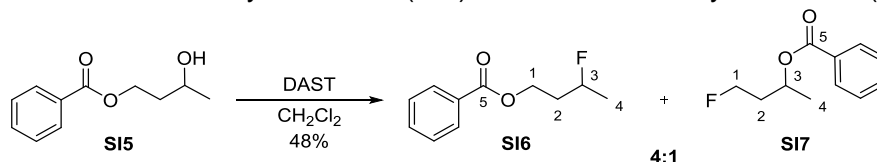

To a solution of 3-hydroxybutyl benzoate **SI5**<sup>37</sup> (4.0 g, 20.6 mmol, 1 equiv) in  $\text{CH}_2\text{Cl}_2$  (20 mL) at 0 °C was added DAST (5.40 mL, 41.2 mmol, 2 equiv) and the resulting mixture was stirred at rt for 21 h. The reaction mixture was diluted with  $\text{CH}_2\text{Cl}_2$  (140 mL) then sat. aq.  $\text{NaHCO}_3$  solution (70 mL) was added and the layers were separated. The aqueous phase was extracted with  $\text{CH}_2\text{Cl}_2$  (2 x 140 mL) and the combined organic layers were dried ( $\text{MgSO}_4$ ), filtered and concentrated to give 4.47 g of crude material. Column chromatography on silica gel eluting with petroleum ether 40–60 °C/ $\text{Et}_2\text{O}$  (96:4 to 90:10) gave 1.944 g (9.91 mmol, 48%) of a 4:1 mixture of **SI6** and **SI7**, which was used in the next step.

$^1\text{H}$  NMR (400 MHz,  $\text{CDCl}_3$ )  $\delta$  8.02 – 8.02 (m, 2H,  $\text{H}_{\text{Ar}}$ ), 7.62 – 7.54 (m, 1H,  $\text{H}_{\text{Ar}}$ ), 7.50 – 7.42 (m, 2H,  $\text{H}_{\text{Ar}}$ ), 5.34 (m, 1H, H-3 **SI7**), 4.90 (ddqd,  $J = 48.9, 8.1, 6.1, 4.4$  Hz, 1H, H-3, **SI6**), 4.59 (ddd,  $J = 47.2, 6.5, 5.5$  Hz, 1H, H-1 **SI7**), 4.57 – 4.40 (m, 2H, H-1 **SI6**), 2.41 – 1.91 (m, 4H, H-2 **SI6** + **SI7**), 1.43 (d,  $J = 6.6$  Hz, 3H, H-4 **SI7**), 1.43 (dd,  $J = 24.0, 6.1$  Hz, 3H, H-4 **SI6**) ppm.  $^{19}\text{F}$  NMR (376 MHz,  $\text{CDCl}_3$ )  $\delta$  –175.7 (ddqd,  $J = 48.9, 29.5, 17.1$  Hz, 1F,  $\text{F}_{\text{SI6}}$ ), –220.5 (tdd,  $J = 47.2, 27.7, 22.5$  Hz, 1F,  $\text{F}_{\text{SI7}}$ ) ppm.

<sup>31</sup> B. Linclau, F. Peron, E. Bogdan, N. Wells, Z. Wang, G. Compain, C. Fontenelle, N. Galland, J.-Y. Le Questel, J. Graton, *Chem. Eur. J.* accepted for publication DOI 10.1002/chem.201503253.

<sup>32</sup> B. Linclau, L. Leung, J. Nonnenmacher, G. Tizzard, *Beilstein J. Org. Chem.* **2010**, *6*, No 62.

<sup>33</sup> J. Graton, Z. Wang, A.-M. Brossard, D. Gonçalves Monteiro, J.-Y. Le Questel, B. Linclau, *Angew Chem Int. Ed.* **2012**, *51*, 6176-6180.

<sup>34</sup> L. Mtashobya, L. Quiquempoix, B. Linclau, *J. Fluorine Chem.* **2015**, *171*, 92-96.

<sup>35</sup> R. S. Timofte, B. Linclau, *Org. Lett.* **2008**, *10*, 3673-3676

<sup>36</sup> a) S. Bresciani, T. Lebl, A. M. Z. Slawin, D. O'Hagan, *Chem. Commun.* **2010**, *46*, 5434-5436; b) M. J. Corr, D. O'Hagan, *J. Fluorine Chem.* **2013**, *155*, 72-77.

<sup>37</sup> Trost, B. M.; Verhoeven, T. R. *J. Am. Chem. Soc.* **1980**, *102*, 4743-4763.

12.1.2. Synthesis of 1-tert-butyldimethylsilyloxy-3-fluorobutane (**S18**)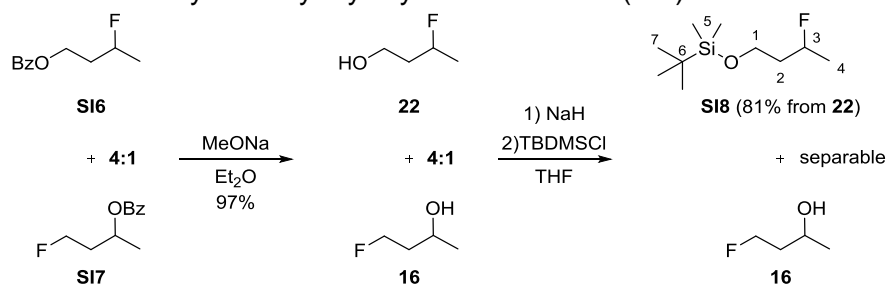

To a solution of the mixture obtained above (1.90 g, 9.68 mmol, 1 equiv) in dry Et<sub>2</sub>O (20 mL) was added MeONa solution (25 %wt in MeOH, 4.4 mL, 19 mmol, 2 equiv) and the resulting mixture was stirred at rt for 21.5 h. The reaction mixture was neutralized with aq. HCl (1 M, 20 mL) and extracted with Et<sub>2</sub>O (3 × 60 mL) and the combined organic layers were dried (MgSO<sub>4</sub>), filtered and evaporated at 750 mbar/30 °C. Column chromatography on silica gel eluting with pentane/Et<sub>2</sub>O (90:10 to 40:60) gave approximately 0.87 g (9.4 mmol, 97%) of an inseparable 4:1 mixture of fluorohydrins **22** and **16** in solution in pentane/Et<sub>2</sub>O (1:2, 15 mL). To 9 mL of this solution (corresponding approximately to 0.41 g, 4.5 mmol, 1.1 equiv of **22**) was added dry THF (6 mL) then NaH (60% in mineral oil, 162 mg, 4.05 mmol, 1 equiv) at 0 °C. The reaction mixture was stirred at rt for 0.5 h then TBDMSCl (610 mg, 4.05 mmol, 1 equiv) in solution in dry THF (4 mL) was added dropwise (20 min) at 0 °C. The reaction mixture was stirred at rt for 18 h after which water (15 mL) was added and layers separated. The aqueous phase was extracted with Et<sub>2</sub>O (3 × 20 mL) and the combined organic layers were dried (MgSO<sub>4</sub>), filtered and concentrated carefully at 750 mbar/30 °C. Column chromatography on silica gel eluting with pentane afforded a 2:1 mixture of **S18** and pentane (calc mass: 680 mg, 3.29 mmol, 81%).

**R<sub>f</sub>** 0.21 (pentane). **<sup>1</sup>H NMR** (400 MHz, CDCl<sub>3</sub>) δ 4.84 (ddqd, <sup>2</sup>J<sub>H3-F</sub> = 49.1, <sup>3</sup>J<sub>H3-H2</sub> = 8.4, <sup>3</sup>J<sub>H3-H4</sub> = 6.2, <sup>3</sup>J<sub>H3-H2'</sub> = 4.0 Hz, 1H, H-3), 3.77 (ddd, <sup>2</sup>J<sub>H1-H1'</sub> = 10.3, <sup>3</sup>J<sub>H1-H2</sub> = 8.3, <sup>3</sup>J<sub>H1-H2'</sub> = 5.2 Hz, 1H, H-1), 3.74 – 3.68 (m, 1H, H-1'), 1.93 – 1.65 (m, 2H, H-2 + H-2'), 1.36 (dd, <sup>3</sup>J<sub>H4-F</sub> = 24.1, <sup>3</sup>J<sub>H4-H3</sub> = 6.2 Hz, 3H, H-4), 0.90 (s, 9H, CH<sub>3</sub> tBu), 0.07 (s, 3H, CH<sub>3</sub>), 0.07 (s, 3H, CH<sub>3</sub>) ppm. **<sup>13</sup>C NMR** (101 MHz, CDCl<sub>3</sub>) δ 88.0 (d, <sup>1</sup>J<sub>C3-F</sub> = 163.6 Hz, C-3), 59.0 (d, <sup>3</sup>J<sub>C1-F</sub> = 5.9 Hz, C-1), 40.0 (d, <sup>2</sup>J<sub>C2-F</sub> = 20.5 Hz, C-2), 25.9 (C-7), 21.2 (d, <sup>2</sup>J<sub>C4-F</sub> = 22.7 Hz, C-4), 18.3 (C-6), -5.4 (C-5), -5.4 (C-5') ppm. **<sup>19</sup>F NMR** (376 MHz, CDCl<sub>3</sub>) δ -175.9 (ddqd, J = 49.2, 32.0, 24.1, 14.7 Hz, 1F, F-3) ppm.

12.1.3. Synthesis of 3-fluorobutan-1-ol (**22**)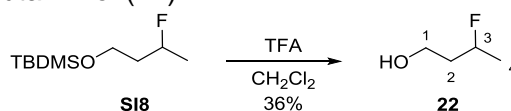

The solution obtained above (approx. mass of **S18**: 680 mg, 3.29 mmol) was stirred in a 3% TFA solution of CH<sub>2</sub>Cl<sub>2</sub> (15 mL) at rt for 7.5 h after which sat. aq. NaHCO<sub>3</sub> solution (5 mL) was added and layers separated. The aqueous phase was extracted with CH<sub>2</sub>Cl<sub>2</sub> (2 × 10 mL) and the combined organic layers were dried (MgSO<sub>4</sub>), filtered and concentrated carefully at 700 mbar/30 °C. Column chromatography on silica gel eluting with pentane/Et<sub>2</sub>O (70:30 to 50:50) afforded 110 mg of **22** (1.19 mmol, 36%).

**R<sub>f</sub>** 0.33 (pentane/Et<sub>2</sub>O 60:40). **IR** (neat) 3334 (br., w), 2961 (w), 2940 (w), 1386, (m), 1051 (s), 888 (m). **<sup>1</sup>H NMR** (400 MHz, CDCl<sub>3</sub>) δ 4.89 (ddqd, <sup>2</sup>J<sub>H3-F</sub> = 49.3, <sup>3</sup>J<sub>H3-H2</sub> = 8.6, <sup>3</sup>J<sub>H3-H4</sub> = 6.1, <sup>3</sup>J<sub>H3-H2'</sub> = 3.8 Hz, 1H, H-3), 3.88 – 3.74 (m, 2H, H-1), 1.98 – 1.72 (m, 2H, H-2), 1.64 (br s, 1H, OH), 1.38 (dd, <sup>3</sup>J<sub>H4-F</sub> = 24.2, <sup>3</sup>J<sub>H4-H3</sub> = 6.1 Hz, 3H, H-4) ppm. **<sup>13</sup>C NMR** (101 MHz, CDCl<sub>3</sub>) δ 89.2 (d, <sup>1</sup>J<sub>C3-F</sub> = 162.9 Hz, C-3), 59.4 (d, <sup>3</sup>J<sub>C1-F</sub> = 4.4 Hz, C-1), 39.5 (d, <sup>2</sup>J<sub>C2-F</sub> = 19.8 Hz, C-2), 21.2 (d, <sup>2</sup>J<sub>C4-F</sub> = 22.0 Hz, C-4) ppm. **<sup>19</sup>F NMR** (376 MHz, CDCl<sub>3</sub>) δ -175.3 (ddqdd, <sup>2</sup>J<sub>F-H3</sub> = 49.3, <sup>3</sup>J<sub>F-H2</sub> = 32.9, <sup>3</sup>J<sub>F-H4</sub> = 24.3, <sup>3</sup>J<sub>F-H2'</sub> = 15.6, J<sub>F-H</sub> = 3.5 Hz, 1F, F-3) ppm. **HRMS** (MS+) for C<sub>4</sub>H<sub>9</sub>FO, calcd 92.0632, found 92.0650.

## 12.2. Synthesis of 1,1,1-trifluoropentan-2-ol (**29**)

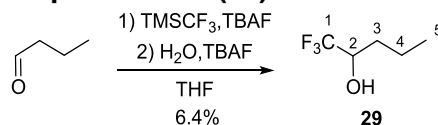

The following is an adaptation of a procedure from Kelly *et al.*<sup>38</sup> To a mixture of *n*-butanal (0.90 mL, 10.0 mmol, 1 equiv) and trifluoromethyltrimethylsilane (0.5 M in THF, 24 mL, 12.0 mmol, 1.2 equiv) at 0 °C was added TBAF solution (1.0 M in THF, 0.1 mL, 0.1 mmol, 0.01 equiv). After 10 min stirring, the ice-water bath was removed and the reaction mixture was stirred at rt for 5.5 h. After cooling at 0 °C, water (1 mL, 5.5 equiv) then TBAF (1.0 M in THF, 1 mL, 1 mmol, 0.1 equiv) were added and the resultant mixture was stirred at rt for 1.5 h. Brine (50 mL) then Et<sub>2</sub>O (75 mL) were added and layers were partitioned. The aqueous phase was extracted with Et<sub>2</sub>O (3 × 25 mL) then the combined organic layers were dried (MgSO<sub>4</sub>), filtered and carefully concentrated. Column chromatography on silica gel eluting with pentane/Et<sub>2</sub>O (93:7 to 75:25) gave the desired fluorohydrin **29** in solution in pentane/Et<sub>2</sub>O. The product was then distilled using a Kugelrohr heating up to 90 °C at atmospheric pressure gave 91 mg (0.64 mmol, 6.4%) of the pure fluorohydrin **29** as a colourless oil (procedure not optimized). The spectral data matched with the literature.<sup>39</sup>

<sup>1</sup>H NMR (400 MHz, CDCl<sub>3</sub>) δ 4.00 – 3.88 (m, 1H, H-2), 1.96 (d, <sup>3</sup>J<sub>H2-OH</sub> = 6.2 Hz, 1H, OH), 1.75 – 1.39 (m, 4H, H-3 + H-4), 0.99 (t, <sup>3</sup>J<sub>H5-H4</sub> = 7.1 Hz, 3H, H-5) ppm. <sup>13</sup>C NMR (101 MHz, CDCl<sub>3</sub>) δ 125.2 (q, <sup>1</sup>J<sub>C1-F</sub> = 281.7 Hz, C-1), 70.3 (q, <sup>2</sup>J<sub>C2-F</sub> = 31.1 Hz, C-2), 31.6 (q, <sup>3</sup>J<sub>C3-F</sub> = 1.6 Hz, C-3), 18.2 (C-4), 13.6 (C-5) ppm. <sup>19</sup>F NMR (376 MHz, CDCl<sub>3</sub>) δ –80.4 (d, <sup>3</sup>J<sub>F-H2</sub> = 6.9 Hz, 3F, F-1) ppm.

## 12.3. Synthesis of 5-fluoro-1-pentanol (**30**)

### 12.3.1. Synthesis of 5-hydroxypentyl acetate (**SI9**)

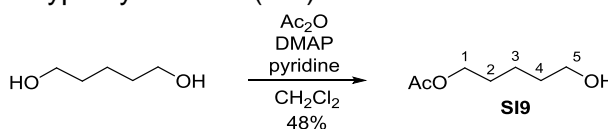

To a round-bottom flask were added 1,5-pentanediol (10 mL, 95.4 mmol, 1 equiv), DCM (200 mL, 2 mL/mmol), pyridine (9.78 mL, 120.9 mmol, 1.27 equiv), 4-DMAP (1.40 g, 11.5 mmol, 0.12 equiv) and acetic anhydride (9.02 mL, 95.4 mmol, 1 equiv). The resulting reaction solution was stirred at 0°C for 45 min and then quenched with water (150 mL), followed by extraction with DCM (150 mL × 3). The combined organic layer was washed with aq. HCl solution (1M, 150 mL), dried over MgSO<sub>4</sub>, filtered and concentrated. The crude was purified by flash chromatography eluting with acetone/petroleum ether (10:90 to 40:60) to give 6.65 g (45.5 mmol, 48%) of the desired monoacetate **SI9** as colorless oil.

<sup>1</sup>H NMR (400 MHz, CDCl<sub>3</sub>) δ 4.00 (t, *J* = 6.7 Hz, 2H, H-1), 3.55 (t, *J* = 6.5 Hz, 2H, H-5), 3.09 (br. s., 1H, -OH), 1.97 (s, 3H, CH<sub>3</sub>), 1.43 - 1.69 (m, 4H, H-2 + H-4), 1.29 - 1.42 (m, 2H, H-3) ppm; <sup>13</sup>C NMR (101 MHz, CDCl<sub>3</sub>) δ 171.2, 64.3, 62.2, 32.0, 28.2, 22.0, 20.8 ppm; NMR data were consistent with the data reported in the literature.<sup>40</sup>

### 12.3.2. Synthesis of 5-fluoropentyl acetate (**SI10**)

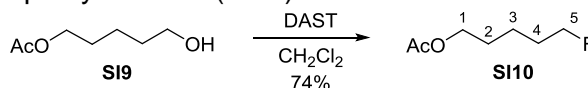

To a round-bottom flask were added 5-hydroxypentyl acetate **SI9** (6.65 g, 45.5 mmol, 1 equiv), DCM (anhydrous, 100 mL) and DAST (9.02 mL, 68.2 mmol, 1.5 equiv). The resulting reaction

<sup>38</sup> C. B. Kelly, M. A. Mercadante, T. A.; Hamlin, M. H. Fletcher, N. E. Leadbeater, *J. Org. Chem.* **2012**, *77*, 8131-8141.

<sup>39</sup> K.-R. Gassen, W. Kirmse, *Chem. Ber.* **1986**, *119*, 2233-2248.

<sup>40</sup> K. Yoshida, T. Furuta, T. Kawabata *Angew. Chem. Int. Ed.* **2011**, *50*, 4888-4898.

mixture was stirred at room temperature overnight and then quenched by sat. aq. NaHCO<sub>3</sub> solution (150 mL), followed by extraction with DCM (150 mL × 3). The combined organic layer was dried over MgSO<sub>4</sub>, filtered and concentrated. The crude was purified by flash chromatography eluting with DCM/pentane (20:80) and then acetone (100%) to give 5.0\* g (33.7\* mmol, 74%\*, \*calculated based on <sup>1</sup>H NMR) of the desired 5-fluoropentyl acetate (**SI10**). Due to the presumed volatility of this fluorinated pentyl acetate, this compound (containing eluting solvents) was used directly for next step without further removal of the solvent residue.

<sup>1</sup>H NMR (400 MHz, CDCl<sub>3</sub>) δ 4.46 (dt, *J* = 47.9, 6.3 Hz, 2H, H-5), 4.09 (t, *J* = 6.2 Hz, 2H, H-1), 2.06 (s, 3H, CH<sub>3</sub>), 1.62 - 1.85 (m, 4H, H-4 + H-2), 1.41 - 1.60 (m, 2H, H-3) ppm; <sup>19</sup>F NMR (376 MHz, CDCl<sub>3</sub>) δ -218.7 (tt, *J* = 46.7, 26.4 Hz, 1F) ppm; <sup>19</sup>F{<sup>1</sup>H} NMR (376 MHz, CDCl<sub>3</sub>) δ -218.7 (s, 1 F) ppm;

### 12.3.3. Synthesis of 5-fluoro-1-pentanol (**30**)

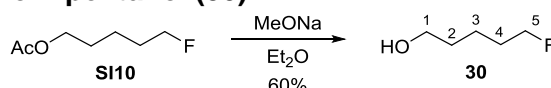

To a round-bottom flask were added 5-fluoropentyl acetate **SI10** (5.0 g, 33.7 mmol, 1 equiv), diethyl ether (50 mL) and NaOMe solution (25% w/w in MeOH, 15.4 mL, 67.4 mmol, 2 equiv). The resulting reaction mixture was stirred at room temperature overnight and then neutralized with aq. HCl solution (1M) up to ca. pH 7, followed by extraction with DCM (100 mL × 3). The combined organic layer was dried over MgSO<sub>4</sub>, filtered and concentrated. The crude was purified by flash chromatography eluting with diethyl ether/DCM (4:94-20:80) to give 2.16 g (20.35 mmol, 60%) of the desired product (**30**) as colorless oil.

*R*<sub>f</sub> 0.25 (Et<sub>2</sub>O/DCM 8:92). IR (neat) 3334 (br., w), 2939 (m), 1391, (w), 1055 (s), 1029 (s), 1006 (m), 990 (m). <sup>1</sup>H NMR (400 MHz, CDCl<sub>3</sub>) δ 4.45 (dt, *J* = 47.4, 6.1 Hz, 2H, H-5), 3.65 (t, *J* = 6.2 Hz, 2H, H-1), 1.55 - 1.81 (m, 5H, H-4 + -OH + H-2), 1.42 - 1.54 (m, 2H, H-3) ppm. <sup>13</sup>C NMR (101 MHz, CDCl<sub>3</sub>) δ 84.0 (d, *J* = 164.7 Hz, C-5), 62.6 (C-1), 32.2 (C-2), 30.1 (d, *J* = 19.6 Hz, C-4), 21.5 (d, *J* = 5.5 Hz, C-3) ppm. <sup>19</sup>F NMR (376 MHz, CDCl<sub>3</sub>) δ -218.4 (tt, *J* = 48.1, 25.1 Hz, 1F) ppm. <sup>19</sup>F{<sup>1</sup>H} NMR (376 MHz, CDCl<sub>3</sub>) δ -218.4 (s, 1F) ppm. MS (EI) *m/z* (%) 86 (2) [M-HF]<sup>+</sup>, 85 (3) [M-HF-H]<sup>+</sup>, 68 (49) [M-H<sub>2</sub>O-HF]<sup>+</sup>, 67 (26) [M-H<sub>2</sub>O-HF-H]<sup>+</sup>, 56 (100) [C<sub>4</sub>H<sub>8</sub>]<sup>+</sup>, 55 (47) [C<sub>4</sub>H<sub>7</sub>]<sup>+</sup>, 41 (52) [C<sub>3</sub>H<sub>5</sub>]<sup>+</sup>. HMRS (MS<sup>+</sup>) for C<sub>5</sub>H<sub>11</sub>FO, calcd 106.0788, found 106.0774. .

### 12.4. Synthesis of 4-fluoropentan-1-ol (**31**)

#### 12.4.1. Synthesis of 4-oxopentyl benzoate (**SI11**)

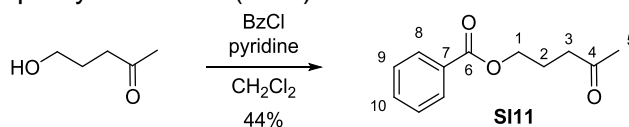

To a mixture of 5-hydroxypentan-2-one (10 mL, 98 mmol, 1 equiv) and pyridine (16 mL, 196 mmol, 2 equiv) in CH<sub>2</sub>Cl<sub>2</sub> at 0°C was added slowly benzoyl chloride (13.6 mL, 118 mmol, 1.2 equiv). After stirring the reaction mixture at rt for 42.5 h, water (150 mL) was added and the mixture was extracted with CH<sub>2</sub>Cl<sub>2</sub> (2 × 300 mL). The combined organic extracts were successively washed with aq. HCl (1.0 M, 100 mL) and sat. aq. NaHCO<sub>3</sub> (200 mL) then dried (MgSO<sub>4</sub>), filtered and concentrated *in vacuo*. Column chromatography on silica gel eluting with petroleum ether 40–60 °C/EtOAc (90:10 to 75:25) gave 8.90 g (43 mmol, 44%) of **SI11** as a pale yellow oil.

*R*<sub>f</sub> 0.21 (petroleum ether 40–60 °C/EtOAc 85:15). <sup>1</sup>H NMR (400 MHz, CDCl<sub>3</sub>) δ 8.03 (d, *J* = 7.8 Hz, 2H, H<sub>Ar</sub>), 7.60 – 7.53 (m, 1H, H<sub>Ar</sub>), 7.48 – 7.41 (m, 2H, H<sub>Ar</sub>), 4.34 (t, <sup>3</sup>*J*<sub>H-H</sub> = 6.4 Hz, 2H, H-1), 2.61 (t, <sup>3</sup>*J*<sub>H-H</sub> = 7.2 Hz, 2H, H-3), 2.18 (s, 3H, H-5), 2.07 (app. quin, <sup>3</sup>*J*<sub>H-H</sub> = 6.8 Hz, 2H, H-2) ppm. <sup>13</sup>C NMR (101 MHz, CDCl<sub>3</sub>) δ 207.6 (C-4), 166.5 (C-6), 132.9 (C-10), 130.2 (C-7), 129.5 (C-8), 128.3 (C-9), 64.1 (C-1), 39.9 (C-3), 30.0 (C-5), 22.9 (C-2) ppm. The spectral data matched with the literature.<sup>41</sup>

<sup>41</sup> T. Nishimura, N. Kakiuchi, T. Onoue, K. Ohe, S. Uemura, *J. Chem. Soc., Perkin Trans. 1* **2000**, 1915-1918.

12.4.2. Synthesis of 4-hydroxypentyl benzoate (**SI12**)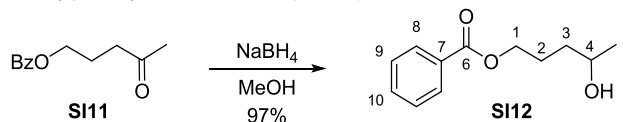

To the ketone **SI11** (4.0 g, 19.4 mmol, 1 equiv) in dry MeOH (40 mL) at 0 °C was added portion wise sodium borohydride (734 mg, 19.4 mmol, 1 equiv). After stirring for 0.5 h at rt, EtOAc (100 mL) was added and the reaction mixture was washed successively with water (50 mL) and brine (30 mL), dried (MgSO<sub>4</sub>), filtered and concentrated to give 3.90 g (18.7 mmol, 97%) of the alcohol **SI12** as a pale yellow oil which was directly used without purification.

*R<sub>f</sub>* 0.23 (petroleum ether 40-60 °C/EtOAc 70:30). <sup>1</sup>H NMR (400 MHz, CDCl<sub>3</sub>) δ 8.05 (d, *J* = 7.8 Hz, 2H, H<sub>Ar</sub>), 7.60 – 7.53 (m, 1H, H<sub>Ar</sub>), 7.48 – 7.41 (m, 2H, H<sub>Ar</sub>), 4.36 (t, *J* = 6.6 Hz, 2H, H-5), 3.89 (app. sxt, *J* = 6.2 Hz, 1H, H-2), 2.01 – 1.76 (m, 2H, H-4), 1.65 – 1.57 (m, 2H, H-3), 1.53 (br s, 1H, OH), 1.25 (d, *J* = 6.1 Hz, 3H, H-1) ppm. <sup>13</sup>C NMR (101 MHz, CDCl<sub>3</sub>) δ 166.6 (C-6), 132.9 (C-10), 130.3 (C-7), 129.5 (C-8), 128.3 (C-9), 67.6 (C-1), 64.9 (C-4), 35.5 (C-3), 25.1 (C-2), 23.6 (C-5) ppm. The spectral data matched with the literature.<sup>42</sup>

12.4.3. Synthesis of 4-fluoropentyl benzoate (**SI13**)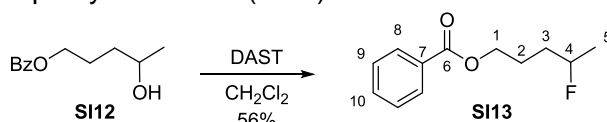

To the crude alcohol (**SI12**) obtained above (3.70 g, 17.8 mmol, 1 equiv) in dry CH<sub>2</sub>Cl<sub>2</sub> (20 mL) at 0 °C was added DAST (3.49 mL, 26.7 mmol, 1.5 equiv). After stirring at rt for 14.5 h, 0.5 equiv of DAST was added and stirring was continued for 6 h. The reaction mixture was diluted with CH<sub>2</sub>Cl<sub>2</sub> (140 mL), quenched with sat. aq. NaHCO<sub>3</sub> (70 mL) and layers were separated. The aqueous phase was extracted with CH<sub>2</sub>Cl<sub>2</sub> (2 × 140 mL) and the combined organic layers were dried (MgSO<sub>4</sub>), filtered and concentrated. Column chromatography on silica gel eluting with petroleum ether 40–60 °C/Et<sub>2</sub>O (97:3 to 90:10) gave 2.11 g (10.0 mmol, 56%) of **SI13** as a pale yellow oil.

*R<sub>f</sub>* 0.31 (petroleum ether 40-60 °C/Et<sub>2</sub>O 95:5). <sup>1</sup>H NMR (400 MHz, CDCl<sub>3</sub>) δ 8.08 – 8.03 (m, 2H, H<sub>Ar</sub>), 7.61 – 7.54 (m, 1H, H<sub>Ar</sub>), 7.49 – 7.42 (m, 2H, H<sub>Ar</sub>), 4.85 – 4.63 (m, <sup>2</sup>*J*<sub>H4-F</sub> = 48.9 Hz, 1H, H-4), 4.44 – 4.31 (m, 2H, H-1), 2.05 – 1.62 (m, 4H, H-2 + H-3), 1.37 (dd, <sup>3</sup>*J*<sub>H5-F</sub> = 24.0, <sup>3</sup>*J*<sub>H5-H4</sub> = 6.1 Hz, 3H, H-5) ppm. <sup>13</sup>C NMR (101 MHz, CDCl<sub>3</sub>) δ 166.6 (C-6), 132.9 (C-10), 130.3 (C-7), 129.5 (C-8), 128.3 (C-9), 90.4 (d, <sup>1</sup>*J*<sub>C4-F</sub> = 165.1 Hz, C-4), 64.6 (C-1), 33.5 (d, <sup>2</sup>*J*<sub>C3-F</sub> = 21.3 Hz, C-3), 24.6 (d, <sup>3</sup>*J*<sub>C2-F</sub> = 5.1 Hz, C-2), 21.0 (d, <sup>2</sup>*J*<sub>C5-F</sub> = 22.7 Hz, C-5) ppm. <sup>19</sup>F NMR (376 MHz, CDCl<sub>3</sub>) δ -173.7 (ddqd, <sup>2</sup>*J*<sub>F-H4</sub> = 48.5, <sup>3</sup>*J*<sub>F-H3</sub> = 29.5, <sup>3</sup>*J*<sub>F-H5</sub> = 24.3, <sup>3</sup>*J*<sub>F-H3'</sub> = 17.3 Hz, 1F, F-4) ppm. **MS** (ESI) *m/z* 211 (M + H)<sup>+</sup>.

12.4.4. Synthesis of 4-fluoropentan-1-ol (**31**)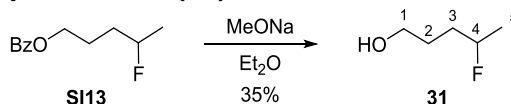

To a solution of benzoate **SI13** (2.00 g, 9.51 mmol, 1 equiv) in dry Et<sub>2</sub>O (20 mL) was added MeONa solution (25 %wt in MeOH, 4.35 mL, 19.0 mmol, 2 equiv) and the resulting mixture was stirred at rt for 22 h. The reaction mixture was neutralized with aq. HCl (1 M, 20 mL) and extracted with Et<sub>2</sub>O (3 × 60 mL) then the combined organic layers were dried (MgSO<sub>4</sub>), filtered and evaporated at 750 mbar/30 °C. Column chromatography on silica gel eluting with CH<sub>2</sub>Cl<sub>2</sub>/Et<sub>2</sub>O (100:0 to 80:20) gave the desired fluorohydrin **31** in solution in CH<sub>2</sub>Cl<sub>2</sub>/Et<sub>2</sub>O. The product was then distilled using a Kugelrohr heating at 170 °C at atmospheric pressure but subsequent NMR analysis revealed that approximately 20 % of the product had cyclised to give 2-

<sup>42</sup> S. Caddick, A. J. McCarroll, D. A. Sandham, *Tetrahedron* **2001**, *57*, 6305-6310.



methyltetrahydrofuran. Column chromatography of the mixture obtained on silica gel eluting with pentane/Et<sub>2</sub>O (80:20 to 40:60) followed by HPLC (pentane/Et<sub>2</sub>O, 70:30) gave 353 mg (3.33 mmol, 35%) of the pure fluorohydrin **31** as a colourless oil.

**R<sub>f</sub>** 0.29 (pentane/Et<sub>2</sub>O 60:40). **IR** (neat) 3335 (br., w), 2939 (m), 1386, (m), 1058 (s), 1037 (s), 1007 (s), 988 (s). **<sup>1</sup>H NMR** (400 MHz, CDCl<sub>3</sub>) δ 4.83 – 4.60 (m, <sup>2</sup>J<sub>H4-F</sub> = 48.9 Hz, 1H, H-4), 3.78 – 3.63 (m, 2H, H-1), 1.82 – 1.56 (m, 4H, H-2 + H-3), 1.41 – 1.30 (m, 1H, OH), 1.35 (dd, <sup>3</sup>J<sub>H5-F</sub> = 23.8, <sup>3</sup>J<sub>H5-H4</sub> = 6.1 Hz, 3H, H-5) ppm. **<sup>13</sup>C NMR** (101 MHz, CDCl<sub>3</sub>) δ 90.9 (d, <sup>1</sup>J<sub>C4-F</sub> = 164.3 Hz, C-4), 62.6 (C-1), 33.2 (d, <sup>2</sup>J<sub>C3-F</sub> = 21.3 Hz, C-3), 28.3 (d, <sup>3</sup>J<sub>C2-F</sub> = 4.4 Hz, C-2), 21.0 (d, <sup>2</sup>J<sub>C5-F</sub> = 22.7 Hz, C-5) ppm. **<sup>19</sup>F NMR** (376 MHz, CDCl<sub>3</sub>) δ –173.2 – –172.6 (m, 1F, F-4) ppm. **MS** (EI) *m/z* (%) 88 (2) [M-H<sub>2</sub>O]<sup>+</sup>, 86 (2) [M-HF]<sup>+</sup>, 73 (18) [M-H<sub>2</sub>O-Me]<sup>+</sup>, 71 (9) [M-HF-Me]<sup>+</sup> 56 (100) [C<sub>4</sub>H<sub>8</sub>]<sup>+</sup>, 55 (20) [C<sub>4</sub>H<sub>7</sub>]<sup>+</sup>, 41 (52) [C<sub>3</sub>H<sub>5</sub>]<sup>+</sup>. **HMRS** (MS+) for C<sub>5</sub>H<sub>11</sub>FO, calcd 106.0788, found 106.0800.

## 12.5. Synthesis of 4,4-difluoropentan-1-ol (**32**)

### 12.5.1. Synthesis of 4,4-difluoropentyl benzoate (**SI14**)

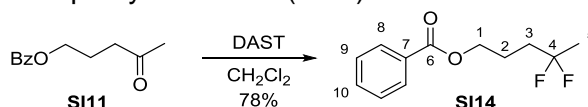

To the ketone **SI11** obtained above (4.00 g, 19.4 mmol, 1 equiv) in dry CH<sub>2</sub>Cl<sub>2</sub> (10 mL) at rt was added DAST (5.1 mL, 39 mmol, 2.0 equiv). After stirring at 50 °C for 16 h, 10 drops of HF-pyridine were added and stirring at 50 °C was continued for 24 h. The reaction mixture was diluted with CH<sub>2</sub>Cl<sub>2</sub> (150 mL), quenched with sat. aq. NaHCO<sub>3</sub> (75 mL) and layers were separated. The aqueous phase was extracted with CH<sub>2</sub>Cl<sub>2</sub> (2 × 150 mL) and the combined organic layers were dried (MgSO<sub>4</sub>), filtered and concentrated. Column chromatography on silica gel eluting with petroleum ether 40–60 °C/Et<sub>2</sub>O (98:2 to 90:10) gave 3.47 g (15.2 mmol, 78%) of **SI14** as a pale yellow oil.

**R<sub>f</sub>** 0.26 (petroleum ether 40-60 °C/Et<sub>2</sub>O 95:5). **<sup>1</sup>H NMR** (400 MHz, CDCl<sub>3</sub>) δ 8.05 (d, <sup>3</sup>J<sub>H-H</sub> = 8.1 Hz, 2H, H<sub>Ar</sub>), 7.62 – 7.54 (m, 1H, H<sub>Ar</sub>), 7.51 – 7.42 (m, 2H, H<sub>Ar</sub>), 4.38 (t, <sup>3</sup>J<sub>H1-H2</sub> = 5.9 Hz, 2H, H-1), 2.11 – 1.94 (m, 4H, H-2 + H-3), 1.65 (t, <sup>3</sup>J<sub>H5-F</sub> = 18.3 Hz, 3H, H-5) ppm. **<sup>13</sup>C NMR** (101 MHz, CDCl<sub>3</sub>) δ 166.5 (C-6), 133.0 (C-10), 130.2 (C-7), 129.5 (C-8), 128.4 (C-9), 123.8 (t, <sup>1</sup>J<sub>C4-F</sub> = 238.4 Hz, C-4), 64.1 (C-1), 34.7 (t, <sup>2</sup>J<sub>C3-F</sub> = 26.0 Hz, C-3), 23.4 (t, <sup>2</sup>J<sub>C5-F</sub> = 27.9 Hz, C-5), 22.2 (t, <sup>3</sup>J<sub>C2-F</sub> = 4.8 Hz, C-2) ppm. **<sup>19</sup>F NMR** (376 MHz, CDCl<sub>3</sub>) δ –91.4 – –91.7 (m, 2F, F-4) ppm. **MS** (ESI) *m/z* 229 (M + H)<sup>+</sup>.

### 12.5.2. Synthesis of 4,4-difluoropentan-1-ol (**32**)

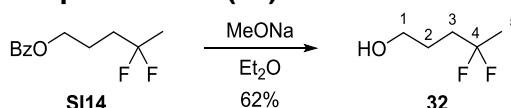

To a solution of benzoate **SI14** (3.30 g, 14.5 mmol, 1 equiv) in dry Et<sub>2</sub>O (30 mL) was added MeONa solution (25 %wt in MeOH, 6.6 mL, 29 mmol, 2 equiv) and the resulting mixture was stirred at rt for 22 h. The reaction mixture was neutralized with aq. HCl (1 M, 30 mL) and extracted with Et<sub>2</sub>O (3 × 90 mL) then the combined organic layers were dried (MgSO<sub>4</sub>), filtered and evaporated at 750 mbar/30 °C. Column chromatography on silica gel eluting with CH<sub>2</sub>Cl<sub>2</sub>/Et<sub>2</sub>O (100:0 to 80:20) gave the desired fluorohydrin **32** in solution in CH<sub>2</sub>Cl<sub>2</sub>/Et<sub>2</sub>O. The product was then distilled using a Kugelrohr heating at 170 °C at atmospheric pressure gave 1.12 g (9.02 mmol, 62%) of the pure fluorohydrin **32** as a colourless oil.

**R<sub>f</sub>** 0.17 (CH<sub>2</sub>Cl<sub>2</sub>). Bp 150-160 °C. **IR** (neat) 3335 (br., w), 2948 (w), 1393, (s), 1025 (s), 913 (s). **<sup>1</sup>H NMR** (400 MHz, CDCl<sub>3</sub>) δ 3.71 (app. q, <sup>3</sup>J<sub>H1-H2</sub> = <sup>3</sup>J<sub>H1-OH</sub> = 5.9 Hz, 2H, H-1), 2.03 – 1.89 (m, 2H, H-3), 1.81 – 1.72 (m, 2H, H-2), 1.62 (t, <sup>3</sup>J<sub>H5-F</sub> = 18.3 Hz, 3H, H-5), 1.36 (br s, 1H, OH) ppm. **<sup>13</sup>C NMR** (101 MHz, CDCl<sub>3</sub>) δ 124.2 (t, <sup>1</sup>J<sub>C4-F</sub> = 237.3 Hz, C-4), 62.0 (C-1), 34.3 (t, <sup>2</sup>J<sub>C3-F</sub> = 26.0 Hz, C-3), 25.8 (t, <sup>3</sup>J<sub>C2-F</sub> = 4.4 Hz, C-2), 23.3 (t, <sup>3</sup>J<sub>C5-F</sub> = 27.9 Hz, C-5) ppm. **<sup>19</sup>F NMR** (376 MHz, CDCl<sub>3</sub>) δ –91.1 (app. sxt, J<sub>F-H</sub> = 17.7 Hz, 2F, F-4) ppm. **MS** (EI) *m/z* (%) 91 (10) [M-H<sub>2</sub>O-Me]<sup>+</sup>, 89 (10) [M-HF-

Me<sup>+</sup>], 87 (7) [M-H<sub>2</sub>O-F]<sup>+</sup>, 86 (4) [M-H<sub>2</sub>O-HF]<sup>+</sup>, 84 (6) [M-2HF]<sup>+</sup>, 74 (100) [C<sub>4</sub>H<sub>7</sub>F]<sup>+</sup>, 73 (23) [C<sub>4</sub>H<sub>6</sub>F]<sup>+</sup>, 59 (65) [C<sub>3</sub>H<sub>4</sub>F]<sup>+</sup>. **HRMS** (MS+) for C<sub>5</sub>H<sub>10</sub>F<sub>2</sub>O, calcd 124.0636, found 124.0694.

## 12.6. Synthesis of 2-fluoropentan-1-ol (33)

### 12.6.1. Synthesis of 2-hydroxypentyl tosylate (SI15)

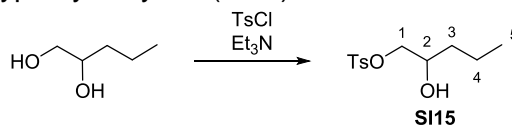

To a round-bottom flask were added 1,2-pentanediol (6.41 mL, 59.8 mmol, 2 equiv), triethylamine (4.4 mL, 31.4 mmol, 1.05 equiv) and tosyl chloride (5.7 g, 29.9 mmol, 1 equiv). The resulting reaction mixture was stirred at room temperature overnight and then quenched by water (50 mL), followed by extraction with ethyl acetate (70 mL × 3). The combined organic layer was dried over MgSO<sub>4</sub>, filtered and concentrated. The crude was used directly for next step without further purification.

**<sup>1</sup>H NMR** (400 MHz, CDCl<sub>3</sub>) δ 7.82 (d, *J* = 8.2 Hz, 2H, H<sub>Ar</sub>), 7.38 (d, *J* = 8.3 Hz, 2H, H<sub>Ar</sub>), 4.00 - 4.11 (m, 1H, H-2), 3.81 - 3.97 (m, 2H, H-1), 2.48 (s, 3H, ArCH<sub>3</sub>), 1.20 - 1.68 (m, 4H, H-3 + H-4), 0.92 (t, *J* = 6.9 Hz, 3H, H-5) ppm;

### 12.6.2. Synthesis of 2-fluoropentyl tosylate (SI16)

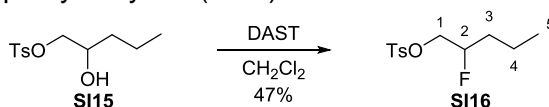

To a round-bottom flask were added 2-hydroxypentyl tosylate (**SI15**) (780 mg, 3.02 mmol, 1 equiv), DCM (anhydrous, 20 mL) and DAST (1.20 mL, 9.06 mmol, 3 equiv). The resulting reaction solution was stirred at room temperature overnight under argon and then quenched by sat. aq. NaHCO<sub>3</sub> solution (50 mL), followed by extraction with ethyl acetate (50 mL × 3). The combined organic layer was dried over MgSO<sub>4</sub>, filtered and concentrated. The crude was purified by flash chromatography eluting with acetone/petroleum ether (10:90 to 30:70) to give 372 mg (1.43 mmol, 47%) of the desired tosylate product **SI16** as colorless oil.

**<sup>1</sup>H NMR** (400 MHz, CDCl<sub>3</sub>) δ 7.81 (d, *J* = 8.3 Hz, 2H, H<sub>Ar</sub>), 7.36 (d, *J* = 8.1 Hz, 2H, H<sub>Ar</sub>), 4.48 - 4.80 (m, 1H, H-2, a doublet with 48.5 Hz can be observed), 3.98 - 4.23 (m, 2H, H-1), 2.46 (s, 3H, ArCH<sub>3</sub>), 1.29 - 1.75 (m, 4H, H-3 + H-4), 0.93 (t, *J* = 7.2 Hz, 3H, H-5) ppm; **<sup>13</sup>C NMR** (101 MHz, CDCl<sub>3</sub>) δ 145.0 (C<sub>Ar</sub>), 132.7 (C<sub>Ar</sub>), 129.9 (C<sub>Ar</sub>), 127.9 (C<sub>Ar</sub>), 90.2 (d, *J* 174.6 Hz, C-2), 70.7 (d, *J* 23.7 Hz, C-1), 32.9 (d, *J* 20.4 Hz, C-3), 21.6 (ArCH<sub>3</sub>), 17.9 (d, *J* 4.6 Hz, C-4), 13.7 (C-5) ppm; **<sup>19</sup>F NMR** (376 MHz, CDCl<sub>3</sub>) δ -187.8 - -187.2 (m, 1F) ppm; **<sup>19</sup>F {<sup>1</sup>H} NMR** (376 MHz, CDCl<sub>3</sub>) δ -187.5 (s, 1F) ppm;

### 12.6.3. Synthesis of 2-fluoropentan-1-ol (33)

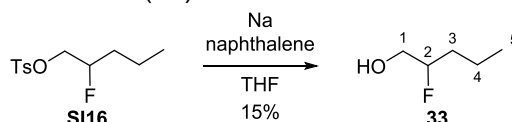

A mixture of sodium (154 mg, 6.70 mmol, 5.6 equiv) and naphthalene (944 mg, 7.37 mmol, 6.2 equiv) in dry THF (15 mL) was sonicated for 30 min. The characteristic dark green solution obtained was cooled to -70 °C and tosylate **SI16** (310 mg, 1.19 mmol, 1 equiv) in THF (15 mL) was added dropwise over 15 min. After stirring for 30 min, the reaction mixture was quenched with NH<sub>4</sub>Cl (sat aq, 15 mL) and extracted with Et<sub>2</sub>O (15 mL then 2 × 30 mL). The combined organic phases were dried (MgSO<sub>4</sub>), filtered and evaporated at 750 mbar/30 °C leading to the crude

product in THF ( $\approx$  20 mL). The crude mixture was diluted with pentane (40 mL), loaded onto silica gel and purified by column chromatography eluting with pentane/Et<sub>2</sub>O (100:0 to 50:50). A second column chromatography eluting with pentane/Et<sub>2</sub>O (80:20) followed by HPLC (pentane/Et<sub>2</sub>O, 77:23) afforded 19 mg (0.179 mmol, 15%) of fluorohydrin **33** as a colourless oil.

**R<sub>f</sub>** 0.4 (pentane/Et<sub>2</sub>O 70:30). **<sup>1</sup>H NMR** (400 MHz, CDCl<sub>3</sub>)  $\delta$  4.70 – 4.50 (m,  $^2J_{\text{H2-F}} = 49.8$  Hz, 1H, H-2), 3.80 – 3.61 (m, 2H), 1.78 (t,  $^3J_{\text{OH-H1}} = 6.5$  Hz, 1H), 1.76 – 1.35 (m, 4H, H-3 + H-4), 0.97 (t,  $^3J_{\text{H5-H4}} = 7.2$  Hz, 3H, H-5) ppm. **<sup>13</sup>C NMR** (101 MHz, CDCl<sub>3</sub>)  $\delta$  94.5 (d,  $^1J_{\text{C2-F}} = 167.3$  Hz, C-2), 65.1 (d,  $^2J_{\text{C1-F}} = 22.0$  Hz, C-1), 33.0 (d,  $^2J_{\text{C3-F}} = 19.8$  Hz, C-3), 18.2 (d,  $^3J_{\text{C4-F}} = 5.1$  Hz, C-4), 13.9 (C-5) ppm. **<sup>19</sup>F NMR** (376 MHz, CDCl<sub>3</sub>)  $\delta$  –190.1 – –190.5 (m, 1F, F-2) ppm. The spectral data matched with the literature.<sup>43</sup>

### 12.7. Synthesis of 4,4,5,5-tetrafluoropentan-1-ol (**34**)

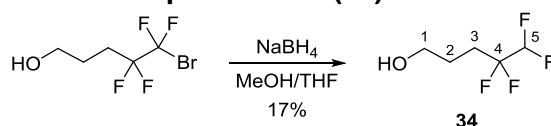

To a mixture of 5-bromo-4,4,5,5-tetrafluoropentan-1-ol (1.0 g, 4.18 mmol, 1 equiv) in dry THF/MeOH (10:1, 11 mL) under argon was added NaBH<sub>4</sub> (177 mg, 4.68 mmol, 1.1 equiv) and the resulting mixture was stirred at rt. After 20 h, 177 mg (1.1 equiv) of NaBH<sub>4</sub> was added and stirring was continued for 5 h after which 322 mg (2 equiv) of NaBH<sub>4</sub> were added again. After 3 h of stirring, aq. H<sub>2</sub>SO<sub>4</sub> (2 M, 25 mL) was added and layers were separated. The aqueous layer was extracted with Et<sub>2</sub>O (3  $\times$  50 mL) and the combined organic layers were dried (MgSO<sub>4</sub>), filtered and concentrated at 725 mbar/30 °C. Column chromatography on silica gel eluting with pentane/Et<sub>2</sub>O (80:20 to 60:40) gave 116 mg (0.725 mmol, 17%) of the desired fluorohydrin **34** as a colorless oil.

**R<sub>f</sub>** 0.28 (pentan/Et<sub>2</sub>O 70:30). **IR** (neat) 3359 (br., w), 2954 (w), 1207, (w), 1097 (s), 1056 (m), 1006 (s). **<sup>1</sup>H NMR** (400 MHz, CDCl<sub>3</sub>)  $\delta$  5.74 (tt,  $J = 54.0, 2.8$  Hz, 1H, H-5), 3.74 (t,  $J = 6.2$  Hz, 2H, H-1), 2.19 – 2.02 (m, 2H, H-3), 1.90 – 1.80 (m, 2H, H-2), 1.43 – 1.32 (m, 1H, OH) ppm. **<sup>13</sup>C NMR** (101 MHz, CDCl<sub>3</sub>)  $\delta$  118.1 (tt,  $J = 245.8, 28.5$  Hz, C-4), 110.3 (tt,  $J = 249.1, 41.4$  Hz, C-5), 61.8 (C-1), 26.3 (t,  $J = 22.4$  Hz, C-3), 23.6 (t,  $J = 3.7$  Hz, C-2) ppm. **<sup>19</sup>F NMR** (376 MHz, CDCl<sub>3</sub>)  $\delta$  –116.3 (t,  $J = 18.6$  Hz, 2F, H-4), –135.5 (d,  $J = 53.8$  Hz, 2F, F-5) ppm. **MS** (EI)  $m/z$  (%) 160 (2) [M]<sup>+</sup>, 159 (3) [M-H]<sup>+</sup>, 140 (5) [M-HF]<sup>+</sup>, 139 (12) [M-HF-H]<sup>+</sup>, 123 (4) [M-H<sub>2</sub>O-F]<sup>+</sup>, 120 (3) [M-2HF]<sup>+</sup>, 119 (3) [M-2HF-H]<sup>+</sup>, 110 (16) [C<sub>4</sub>H<sub>5</sub>F<sub>3</sub>]<sup>+</sup>, 91 (42) [C<sub>4</sub>H<sub>5</sub>F<sub>2</sub>]<sup>+</sup>, 90 (26) [C<sub>4</sub>H<sub>4</sub>F<sub>2</sub>]<sup>+</sup>, 89 (29) [C<sub>4</sub>H<sub>3</sub>F<sub>2</sub>]<sup>+</sup>, 77 (39) [C<sub>3</sub>H<sub>3</sub>F<sub>2</sub>]<sup>+</sup>, 59 (100) [C<sub>3</sub>H<sub>4</sub>F]<sup>+</sup>. **HRMS** (MS+) for C<sub>5</sub>H<sub>8</sub>F<sub>4</sub>O, calcd 160.0506, found, 160.0482.



## 13. Selected NMR spectra for logP determination, with detailed NMR parameter information and integration details after reprocessing

ZW7157-26-1 OCT

SW: 300 ppm  
 O1P: -79.93 ppm  
 D1: 12.03 sec  
 Proton-decoupled  $^{19}\text{F}$  NMR  
 $\rho_{\text{oct}} = 100.00/45.91 = 2.1782$   
[\(see next page for detailed integration information after data processing\)](#)

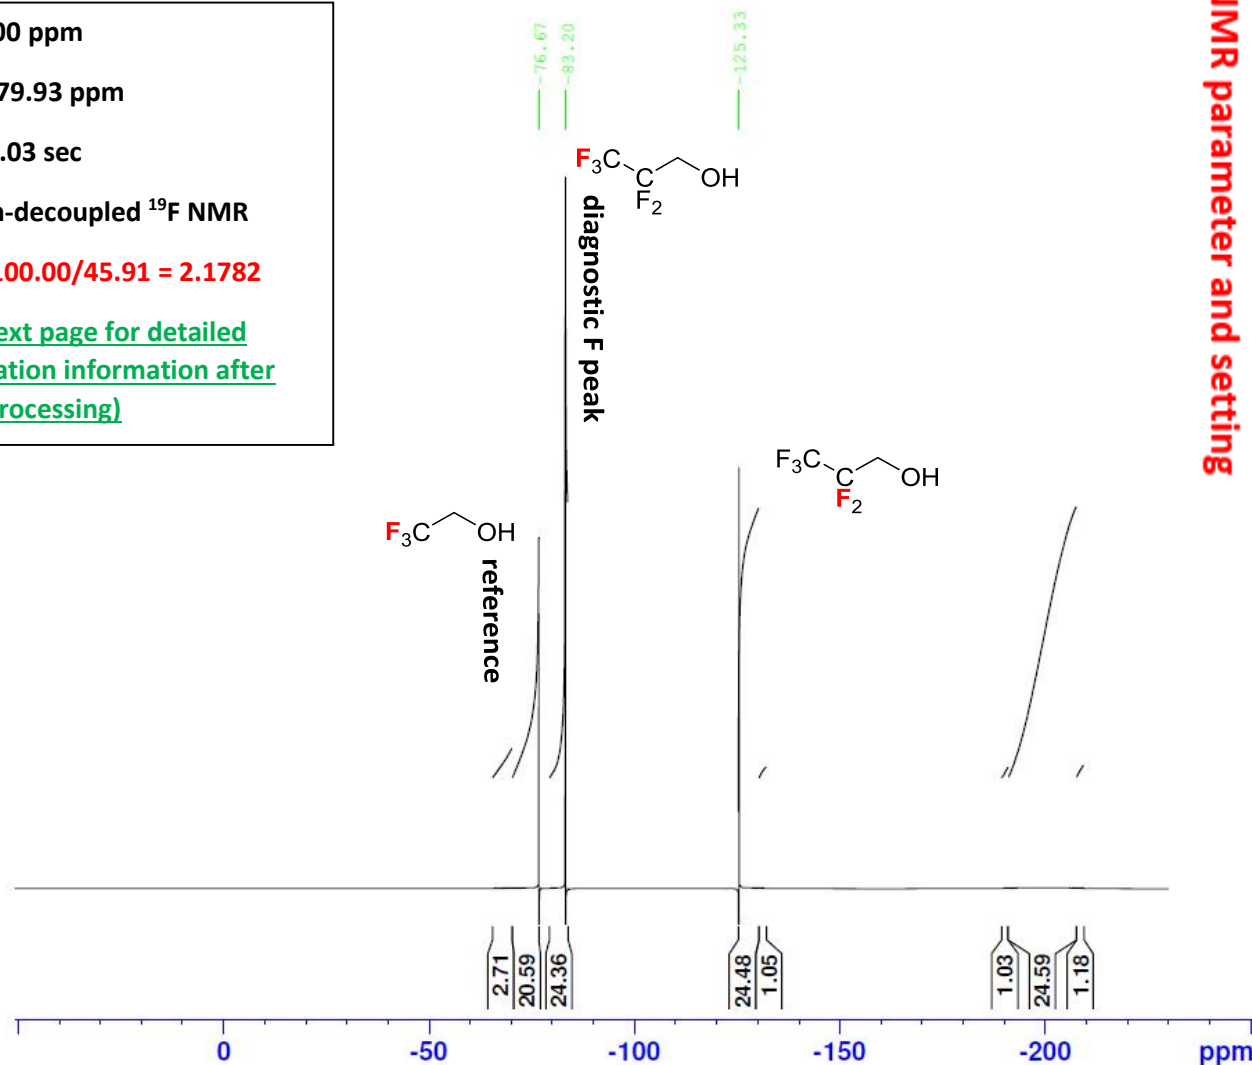
**NMR parameter and setting**

 UNIVERSITY OF  
 Southampton

AVIIIHD400 [3]

 Current Data Parameters  
 NAME se2414zwl  
 EXPNO 10  
 PROCNO 1

 F2 - Acquisition Parameters  
 Date\_ 20140924  
 Time 14.56  
 INSTRUM spect  
 PROBHD 5 mm PABBO BB/  
 PULPROG zgfhigqn.2  
 TD 131072  
 SOLVENT Acetone  
 NS 64  
 DS 4  
 SWH 113636.367 Hz  
 FIDRES 0.866977 Hz  
 AQ 0.5767168 sec  
 RG 212.69  
 DW 4.400 usec  
 DE 6.50 usec  
 TE 298.0 K  
 D1 12.02999973 sec  
 D11 0.03000000 sec  
 D12 0.00002000 sec  
 TD0 1

 ===== CHANNEL f1 =====  
 SFO1 376.4682725 MHz  
 NUC1 19F  
 P1 11.70 usec  
 PLW1 32.00000000 W

 ===== CHANNEL f2 =====  
 SFO2 400.1316005 MHz  
 NUC2 1H  
 CPDPRG[2] waltz16  
 PCPD2 70.00 usec  
 PLW2 32.00000000 W  
 PLW12 0.31999999 W

 F2 - Processing parameters  
 SI 65536  
 SF 376.4980709 MHz  
 WDW EM  
 SSB 0  
 LB 0.30 Hz  
 GB 0  
 PC 1.00

ZW7157-26-1 OCT

|                        |                      |                   |                                                                         |                        |                      |
|------------------------|----------------------|-------------------|-------------------------------------------------------------------------|------------------------|----------------------|
| Acquisition Time (sec) | 0.5767               | Comment           | ZW7157-26-1 OCT                                                         | Date                   | 24 Sep 2014 14:56:16 |
| Date Stamp             | 24 Sep 2014 14:56:16 | File Name         | \\soton.ac.uk\ude\personalfiles\users\zw3g10\mydesktop\se2414zw1\10\fid |                        |                      |
| Frequency (MHz)        | 376.47               | Nucleus           | 19F                                                                     | Number of Transients   | 64                   |
| Original Points Count  | 65536                | Owner             | nmr                                                                     | Points Count           | 262144               |
| Receiver Gain          | 212.69               | SW(cyclical) (Hz) | 113636.36                                                               | Solvent                | Acetone              |
| Spectrum Type          | STANDARD             | Sweep Width (Hz)  | 113635.93                                                               | Temperature (degree C) | 25.000               |
|                        |                      |                   |                                                                         | Pulse Sequence         | zgfhiggn.2           |
|                        |                      |                   |                                                                         | Spectrum Offset (Hz)   | -30093.4844          |

## NMR parameter and setting

**SW: 300 ppm**

**O1P: -79.93 ppm**

**D1: 12.03 sec**

**Proton-decoupled <sup>19</sup>F NMR**

**$\rho_{\text{Oct}} = 100.00/45.91 = 2.1782$**

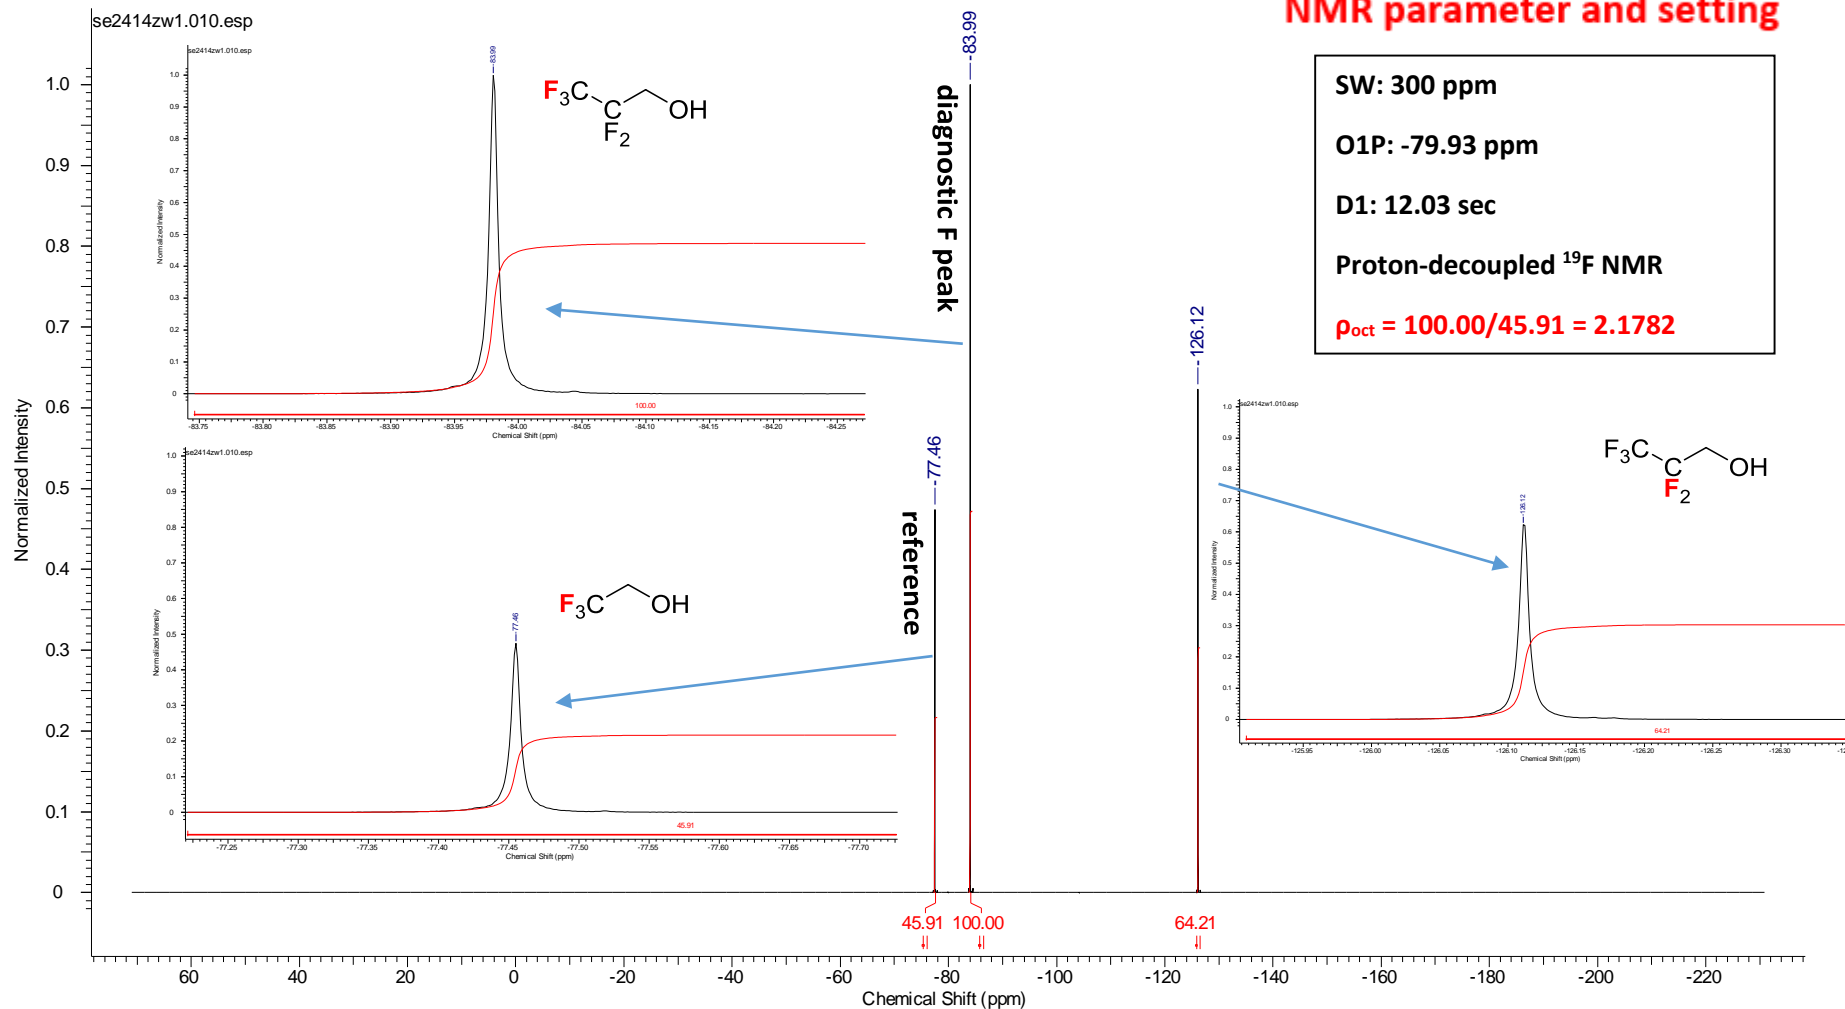

ZW7157-26-1 WAT

**SW: 300 ppm**  
**O1P: -79.34 ppm**  
**D1: 20.31 sec**  
**Proton-decoupled  $^{19}\text{F}$  NMR**  
 $\rho_{\text{wat}} = 100.00/314.97 = 0.3175$   
[\(see next page for detailed integration information after data processing\)](#)

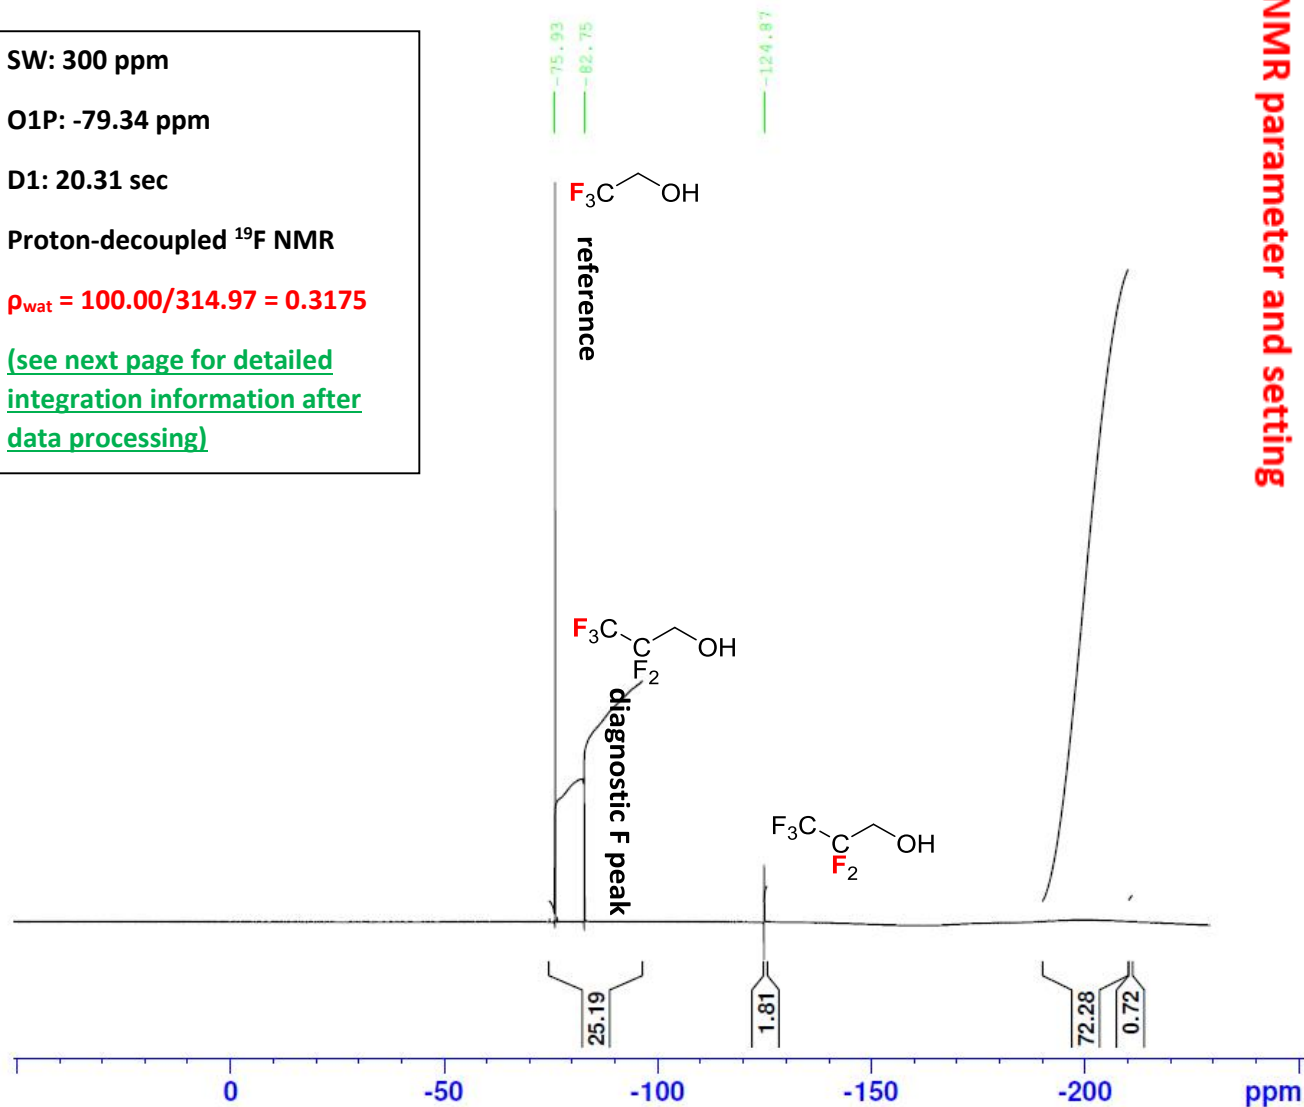
**NMR parameter and setting**

 UNIVERSITY OF  
**Southampton**

AVIIHD400 [3]

Current Data Parameters  
 NAME se2414zw2  
 EXPNO 10  
 PROCNO 1

F2 - Acquisition Parameters  
 Date\_ 20140924  
 Time 16.50  
 INSTRUM spect  
 PROBHD 5 mm PABBO BB/  
 PULPROG zgfhigqn.2  
 TD 131072  
 SOLVENT Acetone  
 NS 64  
 DS 4  
 SWH 113636.367 Hz  
 FIDRES 0.866977 Hz  
 AQ 0.5767168 sec  
 RG 212.69  
 DW 4.400 usec  
 DE 6.50 usec  
 TE 298.0 K  
 D1 20.30999947 sec  
 D11 0.03000000 sec  
 D12 0.00002000 sec  
 TD0 1

===== CHANNEL f1 =====  
 SFO1 376.4684946 MHz  
 NUC1 19F  
 P1 11.70 usec  
 PLW1 32.00000000 W

===== CHANNEL f2 =====  
 SFO2 400.1316005 MHz  
 NUC2 1H  
 CPDPRG[2] waltz16  
 PCPD2 70.00 usec  
 PLW2 32.00000000 W  
 PLW12 0.31999999 W

F2 - Processing parameters  
 SI 65536  
 SF 376.4980709 MHz  
 WDW EM  
 SSB 0  
 LB 0.30 Hz  
 GB 0  
 PC 1.00

|                        |                      |                   |                                                                       |                        |                      |
|------------------------|----------------------|-------------------|-----------------------------------------------------------------------|------------------------|----------------------|
| Acquisition Time (sec) | 0.5767               | Comment           | ZW7157-26-1 WAT                                                       | Date                   | 24 Sep 2014 16:51:28 |
| Date Stamp             | 24 Sep 2014 16:51:28 | File Name         | \\soton.ac.uk\depersonalfiles\users\zw3g10\mydesktop\se2414zw2\10\fid |                        |                      |
| Frequency (MHz)        | 376.47               | Nucleus           | 19F                                                                   | Number of Transients   | 64                   |
| Original Points Count  | 65536                | Owner             | nmr                                                                   | Points Count           | 262144               |
| Receiver Gain          | 212.69               | SW(cyclical) (Hz) | 113636.37                                                             | Solvent                | Acetone              |
| Spectrum Type          | STANDARD             | Sweep Width (Hz)  | 113635.94                                                             | Temperature (degree C) | 24.998               |
|                        |                      |                   |                                                                       | Spectrum Offset (Hz)   | -29871.3516          |

## NMR parameter and setting

SW: 300 ppm

O1P: -79.34 ppm

D1: 20.31 sec

Proton-decoupled <sup>19</sup>F NMR

$\rho_{\text{wat}} = 100.00/314.97 = 0.3175$

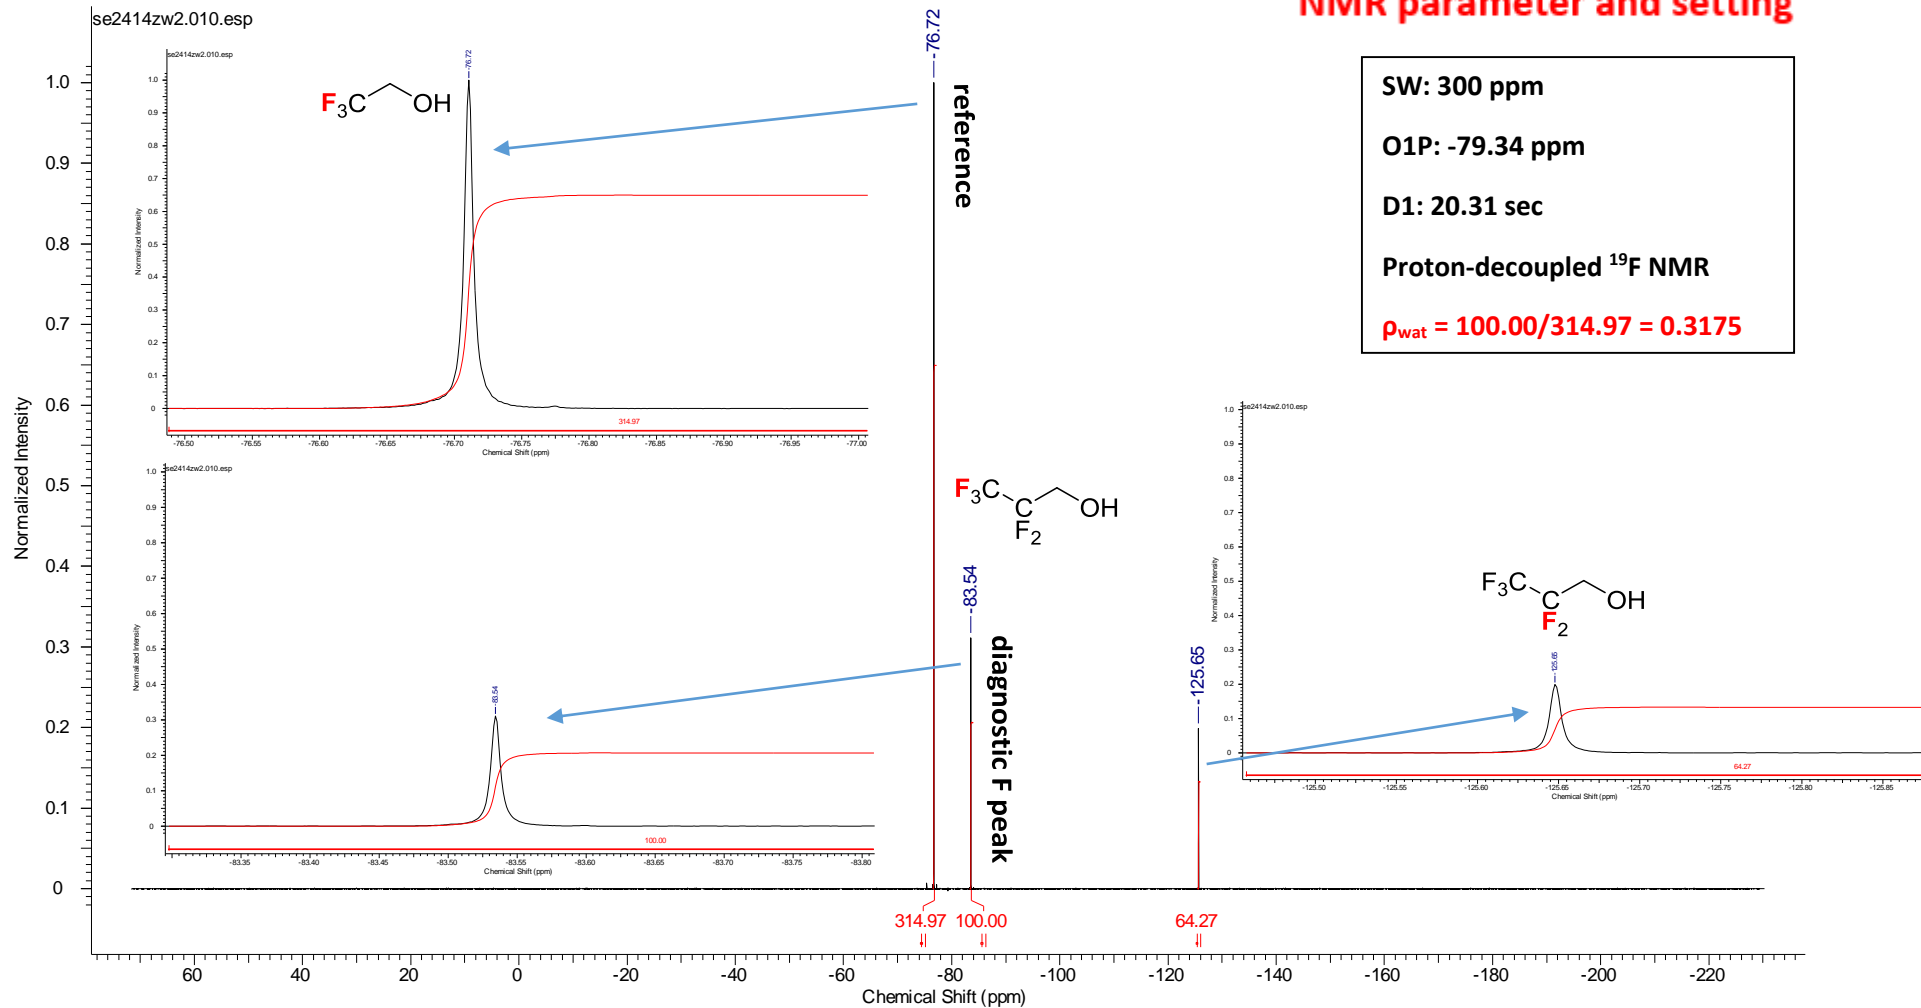



ZW7157-26-1 OCT

SW: 300 ppm

O1P: -101.00 ppm

D1: 12.03 sec

Proton-decoupled  $^{19}\text{F}$  NMR $\rho_{\text{Oct}} = 66.02/45.49 = 1.4513$ 

(see next page for detailed  
integration information after  
data processing)

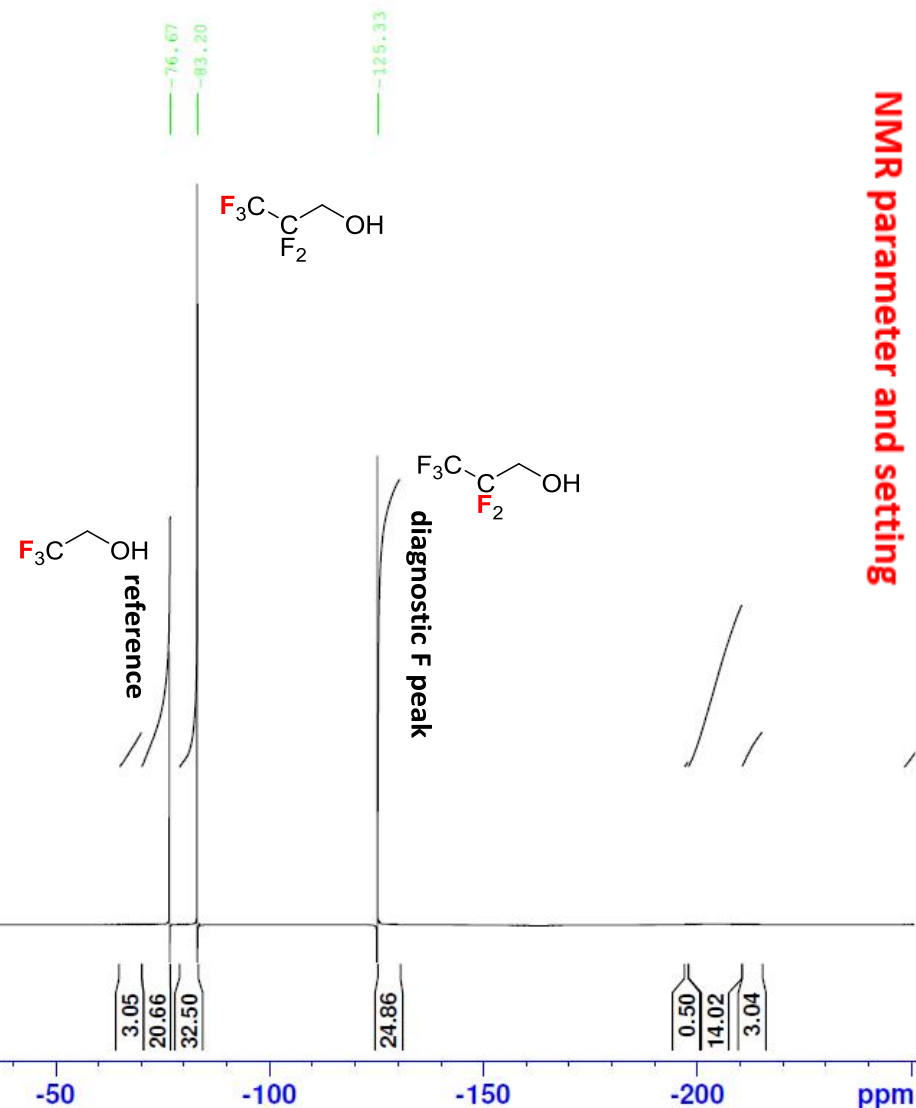

NMR parameter and setting

AVIIIHD400 [3]

Current Data Parameters  
NAME se2414zw1  
EXPNO 13  
PROCNO 1

F2 - Acquisition Parameters  
Date\_ 20140924  
Time 15.47  
INSTRUM spect  
PROBHD 5 mm PABBO BB/  
PULPROG zgfhigqn.2  
TD 131072  
SOLVENT Acetone  
NS 64  
DS 4  
SWH 113636.367 Hz  
FIDRES 0.866977 Hz  
AQ 0.5767168 sec  
RG 212.69  
DW 4.400 usec  
DE 6.50 usec  
TE 298.0 K  
D1 12.02999973 sec  
D11 0.03000000 sec  
D12 0.00002000 sec  
TD0 1

===== CHANNEL f1 =====  
SFO1 376.4603397 MHz  
NUC1 19F  
P1 11.70 usec  
PLW1 32.00000000 W

===== CHANNEL f2 =====  
SFO2 400.1316005 MHz  
NUC2 1H  
CPDPRG[2] waltz16  
PCPD2 70.00 usec  
PLW2 32.00000000 W  
PLW12 0.31999999 W

F2 - Processing parameters  
SI 65536  
SF 376.4980709 MHz  
WDW EM  
SSB 0  
LB 0.30 Hz  
GB 0  
PC 1.00

|                        |                      |                   |                                                                           |                        |                      |
|------------------------|----------------------|-------------------|---------------------------------------------------------------------------|------------------------|----------------------|
| Acquisition Time (sec) | 0.5767               | Comment           | ZW7157-26-1 OCT                                                           | Date                   | 24 Sep 2014 15:47:28 |
| Date Stamp             | 24 Sep 2014 15:47:28 | File Name         | \\soton.ac.uk\udel\personalfiles\users\zw3g10\mydesktop\se2414zw1\113\fid |                        |                      |
| Frequency (MHz)        | 376.46               | Nucleus           | 19F                                                                       | Number of Transients   | 64                   |
| Original Points Count  | 65536                | Owner             | nmr                                                                       | Points Count           | 262144               |
| Receiver Gain          | 212.69               | SW(cyclical) (Hz) | 113636.36                                                                 | Solvent                | Acetone              |
| Spectrum Type          | STANDARD             | Sweep Width (Hz)  | 113635.93                                                                 | Temperature (degree C) | 24.999               |
|                        |                      |                   |                                                                           | Pulse Sequence         | zgfhighgn.2          |
|                        |                      |                   |                                                                           | Spectrum Offset (Hz)   | -38026.2969          |

## NMR parameter and setting

**SW: 300 ppm**  
**O1P: -101.00 ppm**  
**D1: 12.03 sec**  
**Proton-decoupled  $^{19}\text{F}$  NMR**  
 **$\rho_{\text{oct}} = 66.02/45.49 = 1.4513$**

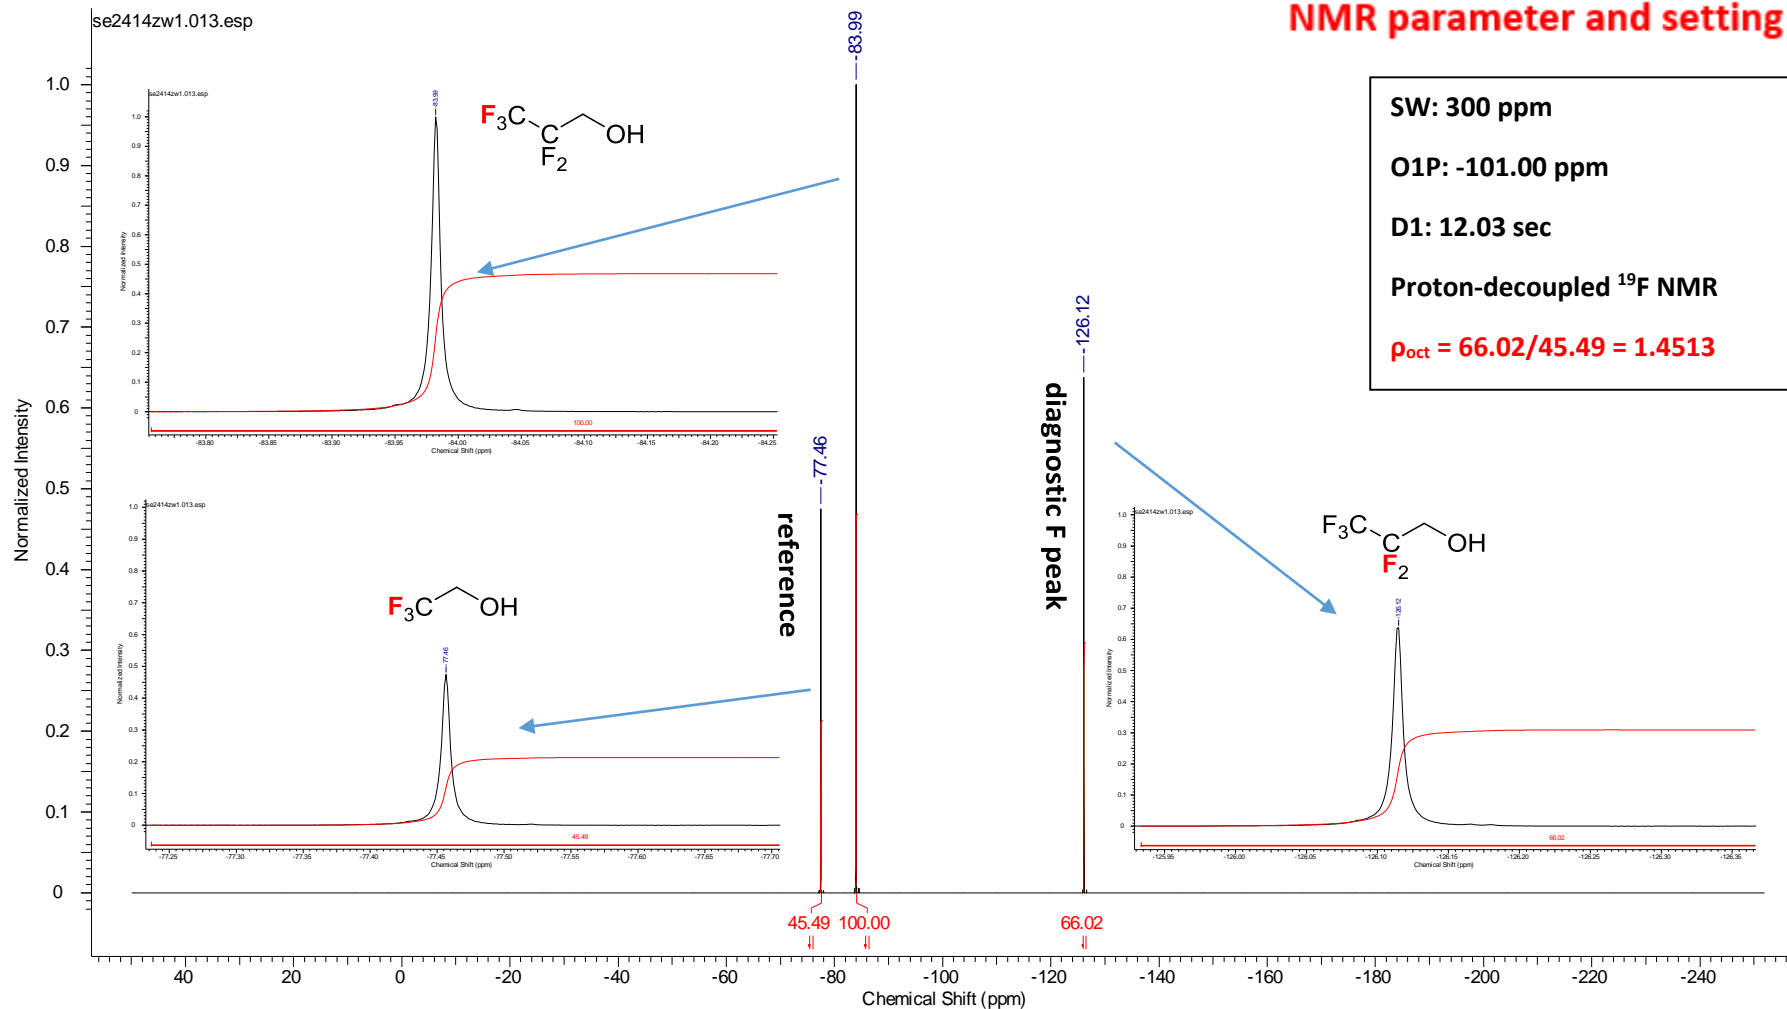

ZW7157-26-1 WAT

AVIIHD400 [3]

Current Data Parameters  
 NAME se2414zw2  
 EXPNO 13  
 PROCNO 1

F2 - Acquisition Parameters  
 Date\_ 20140924  
 Time 18.10  
 INSTRUM spect  
 PROBHD 5 mm PABBO BB/  
 PULPROG zgfhigqn.2  
 TD 131072  
 SOLVENT Acetone  
 NS 64  
 DS 4  
 SWH 113636.367 Hz  
 FIDRES 0.866977 Hz  
 AQ 0.5767168 sec  
 RG 212.69  
 DW 4.400 usec  
 DE 6.50 usec  
 TE 298.0 K  
 D1 20.30999947 sec  
 D11 0.03000000 sec  
 D12 0.00002000 sec  
 TD0 1

===== CHANNEL f1 =====  
 SFO1 376.4605656 MHz  
 NUC1 19F  
 P1 11.70 usec  
 PLW1 32.00000000 W

===== CHANNEL f2 =====  
 SFO2 400.1316005 MHz  
 NUC2 1H  
 CPDPRG[2] waltz16  
 PCPD2 70.00 usec  
 PLW2 32.00000000 W  
 PLW12 0.31999999 W

F2 - Processing parameters  
 SI 65536  
 SF 376.4980709 MHz  
 WDW EM  
 SSB 0  
 LB 0.30 Hz  
 GB 0  
 PC 1.00

NMR parameter and setting

SW: 300 ppm

O1P: -100.40 ppm

D1: 20.31 sec

Proton-decoupled  $^{19}\text{F}$  NMR $\rho_{\text{wat}} = 65.95/312.85 = 0.2108$ 

[\(see next page for detailed  
integration information after  
data processing\)](#)

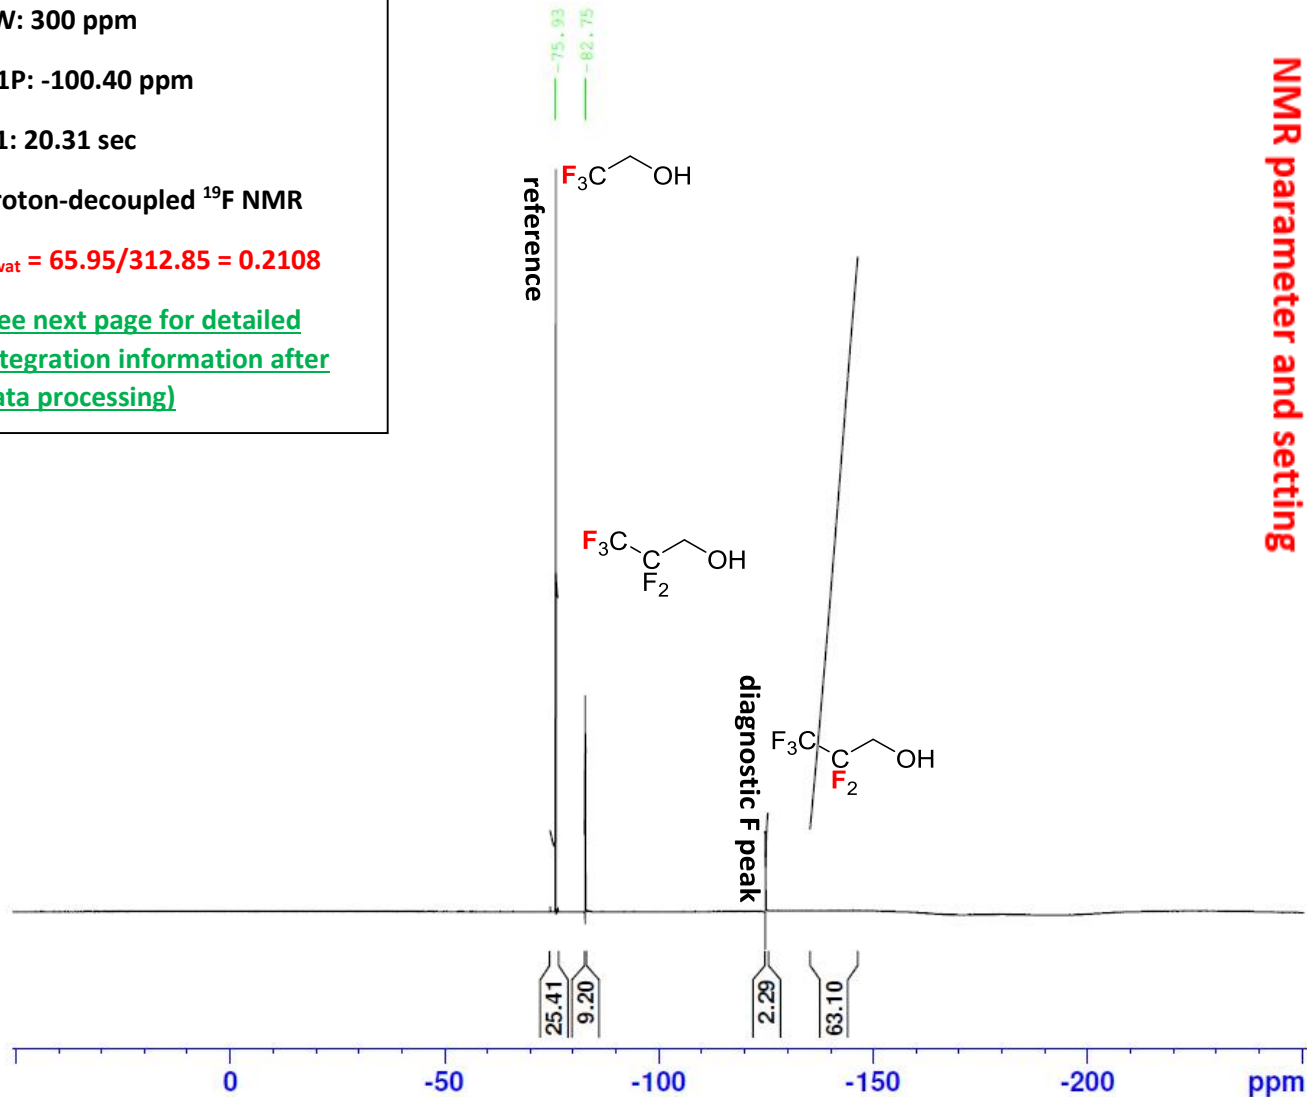

|                        |                      |                   |                                                                        |                        |                      |
|------------------------|----------------------|-------------------|------------------------------------------------------------------------|------------------------|----------------------|
| Acquisition Time (sec) | 0.5767               | Comment           | ZW7157-26-1 WAT                                                        | Date                   | 24 Sep 2014 18:10:24 |
| Date Stamp             | 24 Sep 2014 18:10:24 | File Name         | \\soton.ac.uk\de\personalfiles\users\zw3g10\mydesktop\se2414zw2\13\fid |                        |                      |
| Frequency (MHz)        | 376.46               | Nucleus           | 19F                                                                    | Number of Transients   | 64                   |
| Original Points Count  | 65536                | Owner             | nmr                                                                    | Points Count           | 262144               |
| Receiver Gain          | 212.69               | SW(cyclical) (Hz) | 113636.36                                                              | Solvent                | Acetone              |
| Spectrum Type          | STANDARD             | Sweep Width (Hz)  | 113635.93                                                              | Temperature (degree C) | 24.997               |
|                        |                      |                   |                                                                        | Pulse Sequence         | zgfhigpn.2           |
|                        |                      |                   |                                                                        | Spectrum Offset (Hz)   | -37800.3984          |

## NMR parameter and setting

**SW: 300 ppm**

**O1P: -100.40 ppm**

**D1: 20.31 sec**

**Proton-decoupled <sup>19</sup>F NMR**

**$\rho_{\text{wat}} = 65.95/312.85 = 0.2108$**

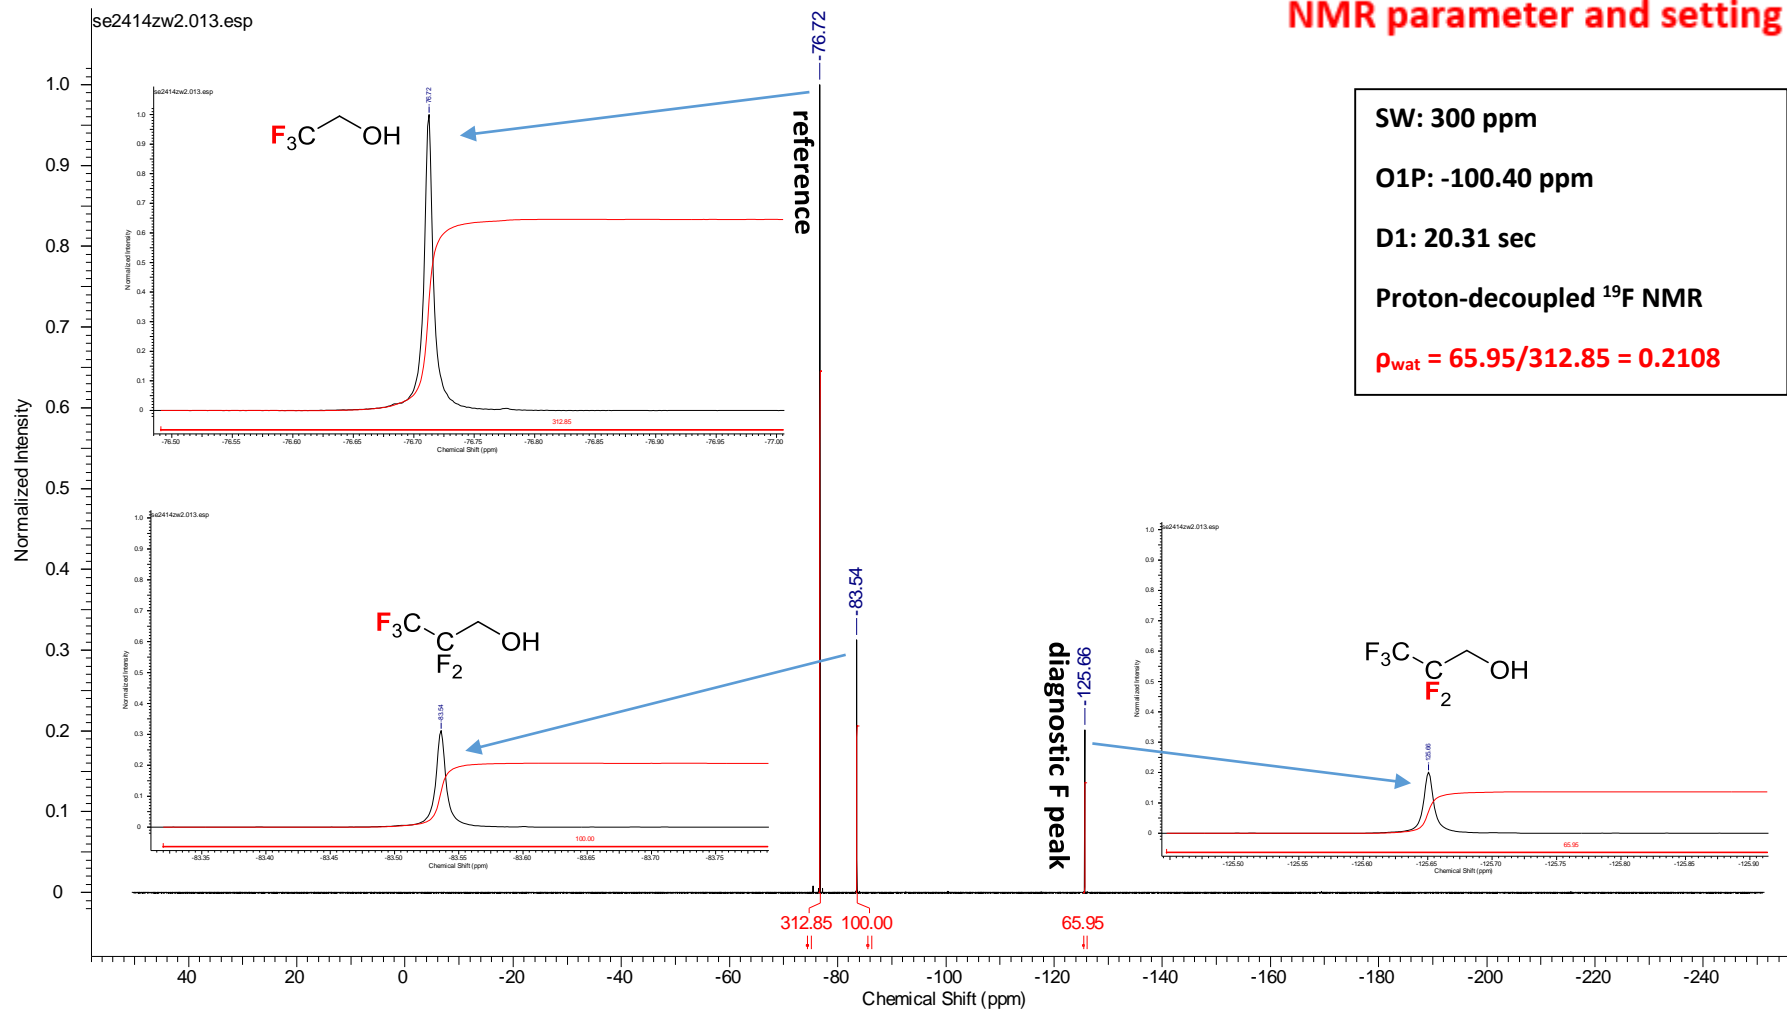

## 14. NMR spectra for fluorinated carbohydrates

14.1. 3-Fluoro-3-deoxy-D-galactose (46), Entry 1, octanol sample  
ZW7157-14 oct

AVII400 [2]

ZW7157-14 oct

RMS of Noise 858197.3125

|                        |                                                                                                                                                  |                   |                 |                        |                      |
|------------------------|--------------------------------------------------------------------------------------------------------------------------------------------------|-------------------|-----------------|------------------------|----------------------|
| Acquisition Time (sec) | 1.1534                                                                                                                                           | Comment           | ZW7157-14 oct   | Date                   | 28 Jun 2014 11:16:32 |
| Date Stamp             | 28 Jun 2014 11:16:32                                                                                                                             |                   |                 |                        |                      |
| File Name              | \\soton.ac.uk\ude\personalfiles\users\zw3g10\mydesktop\logP project\Sugar logP NMR (ZW)\ZW7157-14 3-Deoxy-3-fluoro-D-galactose\ju2614njwz5\1\fid |                   |                 |                        |                      |
| Frequency (MHz)        | 376.44                                                                                                                                           | Nucleus           | <sup>19</sup> F | Number of Transients   | 3296                 |
| Original Points Count  | 131072                                                                                                                                           | Owner             | nmr             | Points Count           | 524288               |
| Receiver Gain          | 500.47                                                                                                                                           | SW(cyclical) (Hz) | 113636.37       | Solvent                | Acetone              |
| Spectrum Type          | STANDARD                                                                                                                                         | Sweep Width (Hz)  | 113636.15       | Temperature (degree C) | 25.119               |
|                        |                                                                                                                                                  |                   |                 | Pulse Sequence         | zgfhigqn.2           |
|                        |                                                                                                                                                  |                   |                 | Spectrum Offset (Hz)   | -56474.6992          |

Current Data Parameters  
 NAME ju2614njwz5  
 EXPNO 1  
 PROCNO 1

F2 - Acquisition Parameters  
 Date\_ 20140628  
 Time 11.17  
 INSTRUM AVII400  
 PROBHD 5 mm SEF 1H/D-  
 PULPROG zgfhigqn.2  
 TD 262144  
 SOLVENT Acetone  
 NS 3296  
 DS 2  
 SWH 113636.367 Hz  
 FIDRES 0.433488 Hz  
 AQ 1.1534336 sec  
 RG 500.47  
 DW 4.400 usec  
 DE 6.50 usec  
 TE 298.1 K  
 D1 15.00000000 sec  
 D11 0.03000000 sec  
 D12 0.00002000 sec  
 TD0 1

===== CHANNEL f1 =====  
 SFO1 376.4418913 MHz  
 NUC1 <sup>19</sup>F  
 P1 14.50 usec  
 PLW1 10.00000000 W

===== CHANNEL f2 =====  
 SFO2 400.1316005 MHz  
 NUC2 <sup>1</sup>H  
 CPDPRG[2] waltz16  
 PCPD2 90.00 usec  
 PLW2 20.00000000 W  
 PLW12 0.24691001 W

F2 - Processing parameters  
 SI 131072  
 SF 376.4983660 MHz  
 WDW EM  
 SSB 0  
 LB 0.30 Hz  
 GB 0  
 PC 1.00

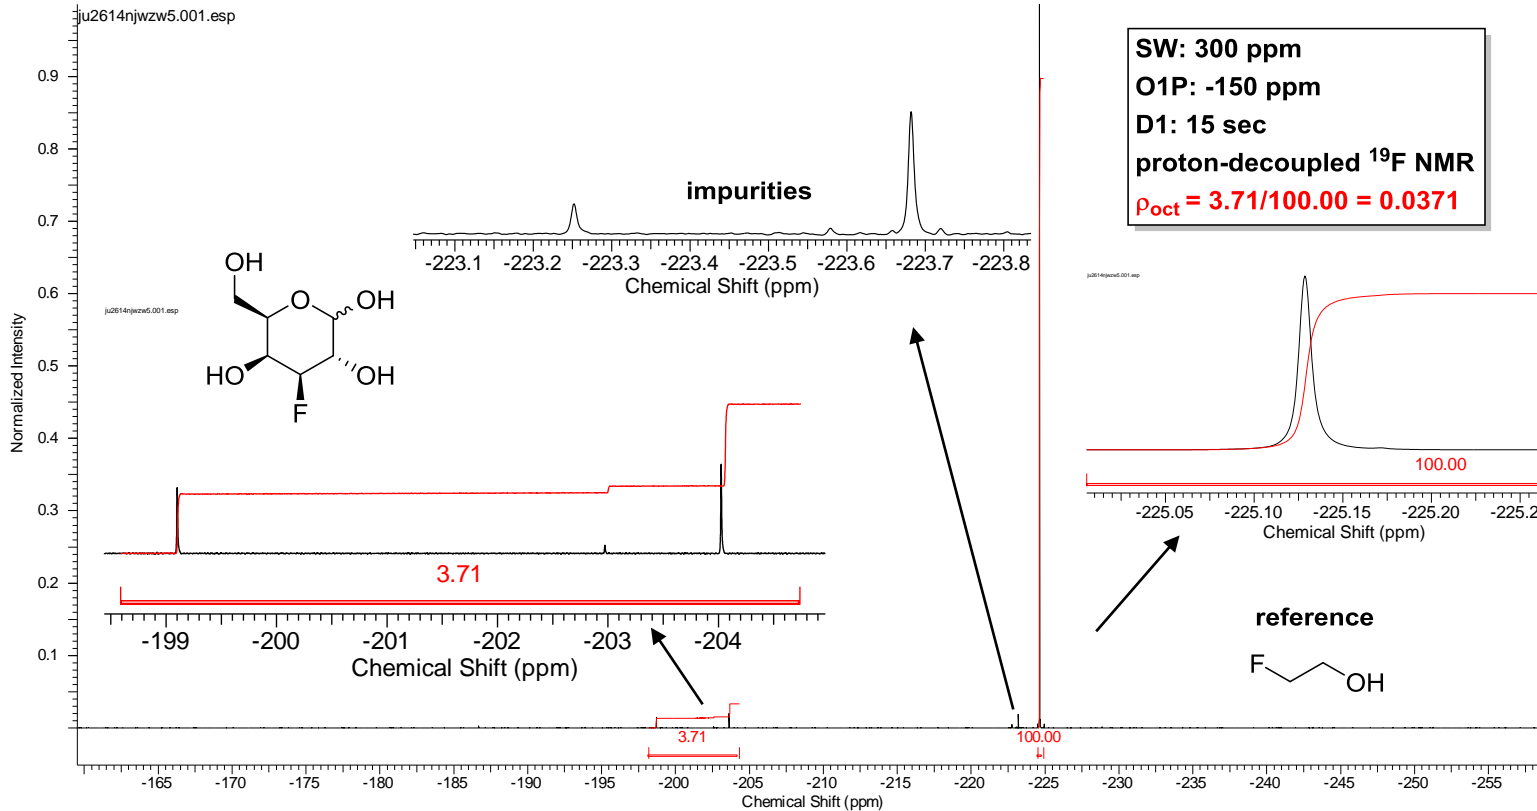

14.2. 3-Fluoro-3-deoxy-D-galactose<sup>44</sup> (46), Entry 1, water sample

## ZW7157-14 wat

ZW7157-14 wat

AVII400 [2]

|                        |                                                                                                                                      |                        |               |                      |                      |
|------------------------|--------------------------------------------------------------------------------------------------------------------------------------|------------------------|---------------|----------------------|----------------------|
| Acquisition Time (sec) | 1.1534                                                                                                                               | Comment                | ZW7157-14 wat | Date                 | 29 Jun 2014 12:37:36 |
| Date Stamp             | 29 Jun 2014 12:37:36                                                                                                                 |                        |               |                      |                      |
| File Name              | \\soton.ac.uk\udel\personalfiles\users\zw3g10\mydesktop\Sugar logP NMR (ZW)\ZW7157-14 3-Deoxy-3-fluoro-D-galactose\ju2614njzw6\1\fid |                        |               |                      |                      |
| Frequency (MHz)        | 376.44                                                                                                                               | Nucleus                | 19F           | Number of Transients | 2329                 |
| Original Points Count  | 131072                                                                                                                               | Owner                  | nmr           | Points Count         | 131072               |
| Receiver Gain          | 405.33                                                                                                                               | SW(cyclical) (Hz)      | 113636.37     | Solvent              | Acetone              |
| Spectrum Type          | STANDARD                                                                                                                             | Sweep Width (Hz)       | 113635.50     | Spectrum Offset (Hz) | -56474.6992          |
|                        |                                                                                                                                      | Temperature (degree C) | 25.119        |                      |                      |

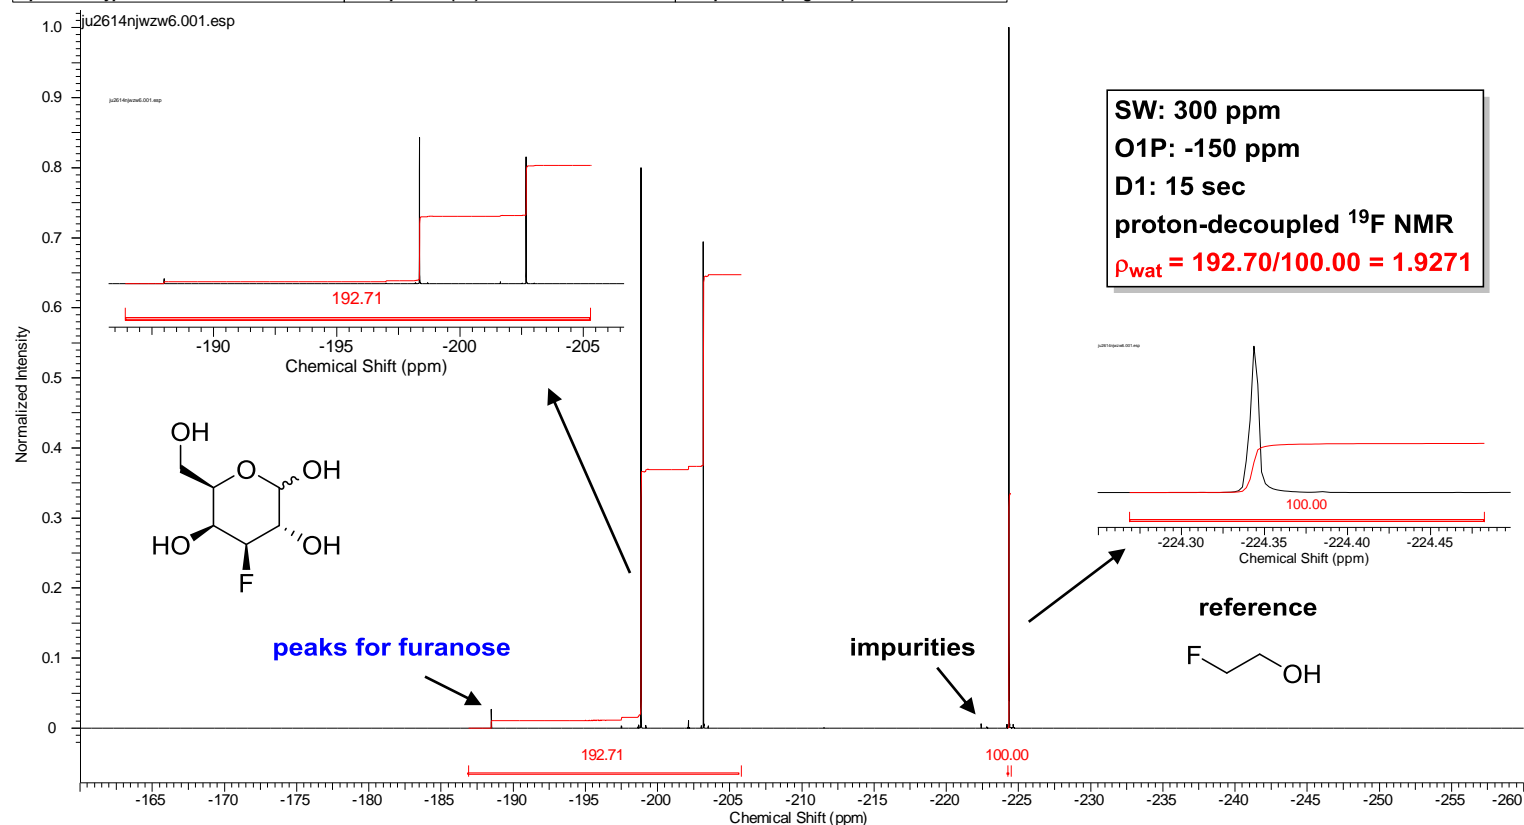

Current Data Parameters  
NAME ju2614njzw6  
EXPNO 1  
PROCNO 1

F2 - Acquisition Parameters  
Date 20140629  
Time 12.38  
INSTRUM AVII400  
PROBHD 5 mm SEF 1H/D-  
PULPROG zgfhigqn.2  
TD 262144  
SOLVENT Acetone  
NS 2329  
DS 2  
SWH 113636.367 Hz  
FIDRES 0.433488 Hz  
AQ 1.1534336 sec  
RG 405.33  
DW 4.400 usec  
DE 6.50 usec  
TE 298.1 K  
D1 15.00000000 sec  
D11 0.03000000 sec  
D12 0.00002000 sec  
TD0 1

===== CHANNEL f1 =====  
SFO1 376.4418913 MHz  
NUC1 19F  
P1 14.50 usec  
PLW1 10.00000000 W

===== CHANNEL f2 =====  
SFO2 400.1316005 MHz  
NUC2 1H  
CPDPRG[2] waltz16  
PCPD2 90.00 usec  
PLW2 20.00000000 W  
PLW12 0.24691001 W

F2 - Processing parameters  
SI 131072  
SF 376.4983660 MHz  
WDW EM  
SSB 0  
LB 0.30 Hz  
GB 0  
PC 1.00

<sup>44</sup>Chemical shift for furanose was consistent with the data reported in the following paper: L. A. Mulard, P. Kováč, C. P. J. Glaudemans, *Carbohydr. Res.* **1994**, 259, 21-34.

## 14.3. 2-Fluoro-2-deoxy-D-galactose (47), Entry 1, octanol sample

ZW7157-13 oct

ZW7157-13 oct

AVII400 [2]

|                                 |                                                                                                                                                  |                               |               |                      |
|---------------------------------|--------------------------------------------------------------------------------------------------------------------------------------------------|-------------------------------|---------------|----------------------|
| <b>RMS of Noise</b> 806636.5625 |                                                                                                                                                  |                               |               |                      |
| <b>Acquisition Time (sec)</b>   | 1.1534                                                                                                                                           | <b>Comment</b>                | ZW7157-13 oct |                      |
| <b>Date Stamp</b>               | 27 Jun 2014 08:10:56                                                                                                                             |                               | <b>Date</b>   | 27 Jun 2014 08:10:56 |
| <b>File Name</b>                | \\soton.ac.uk\ude\personalfiles\users\lw3g10\mydesktop\logP_project\Sugar_logP_NMR (ZW)\ZW7157-13 2-Deoxy-2-fluoro-D-galactose\ju2614njwz3\1\fid |                               |               |                      |
| <b>Frequency (MHz)</b>          | 376.44                                                                                                                                           | <b>Nucleus</b>                | 19F           |                      |
| <b>Original Points Count</b>    | 131072                                                                                                                                           | <b>Owner</b>                  | nmr           |                      |
| <b>Receiver Gain</b>            | 462.30                                                                                                                                           | <b>SW(cyclical) (Hz)</b>      | 113636.37     |                      |
| <b>Spectrum Type</b>            | STANDARD                                                                                                                                         | <b>Sweep Width (Hz)</b>       | 113636.15     |                      |
|                                 |                                                                                                                                                  | <b>Number of Transients</b>   | 3296          |                      |
|                                 |                                                                                                                                                  | <b>Points Count</b>           | 524288        |                      |
|                                 |                                                                                                                                                  | <b>Solvent</b>                | Acetone       |                      |
|                                 |                                                                                                                                                  | <b>Temperature (degree C)</b> | 25.119        |                      |
|                                 |                                                                                                                                                  | <b>Origin</b>                 | AVII400       |                      |
|                                 |                                                                                                                                                  | <b>Pulse Sequence</b>         | zgfhiqgn.2    |                      |
|                                 |                                                                                                                                                  | <b>Spectrum Offset (Hz)</b>   | -56474.6992   |                      |

## Current Data Parameters

NAME ju2614njwz3  
EXPNO 1  
PROCNO 1

## F2 - Acquisition Parameters

Date\_ 20140627  
Time 8.11  
INSTRUM AVII400  
PROBHD 5 mm SEF 1H/D-  
PULPROG zgfhiqgn.2  
TD 262144  
SOLVENT Acetone  
NS 3296  
DS 2  
SWH 113636.367 Hz  
FIDRES 0.433488 Hz  
AQ 1.1534336 sec  
RG 462.3  
DW 4.400 usec  
DE 6.50 usec  
TE 298.1 K  
D1 15.0000000 sec  
D11 0.0300000 sec  
D12 0.0002000 sec  
TDO 1

===== CHANNEL f1 =====  
SFO1 376.4418913 MHz  
NUC1 19F  
P1 14.50 usec  
PLW1 10.0000000 W

===== CHANNEL f2 =====  
SFO2 400.1316005 MHz  
NUC2 1H  
CPDPRG[2] waltz16  
PCPD2 90.00 usec  
PLW2 20.0000000 W  
PLW12 0.24691001 W

F2 - Processing parameters  
SI 131072  
SF 376.4983660 MHz  
WDW EM  
SSB 0  
LB 0.30 Hz  
GB 0  
PC 1.00

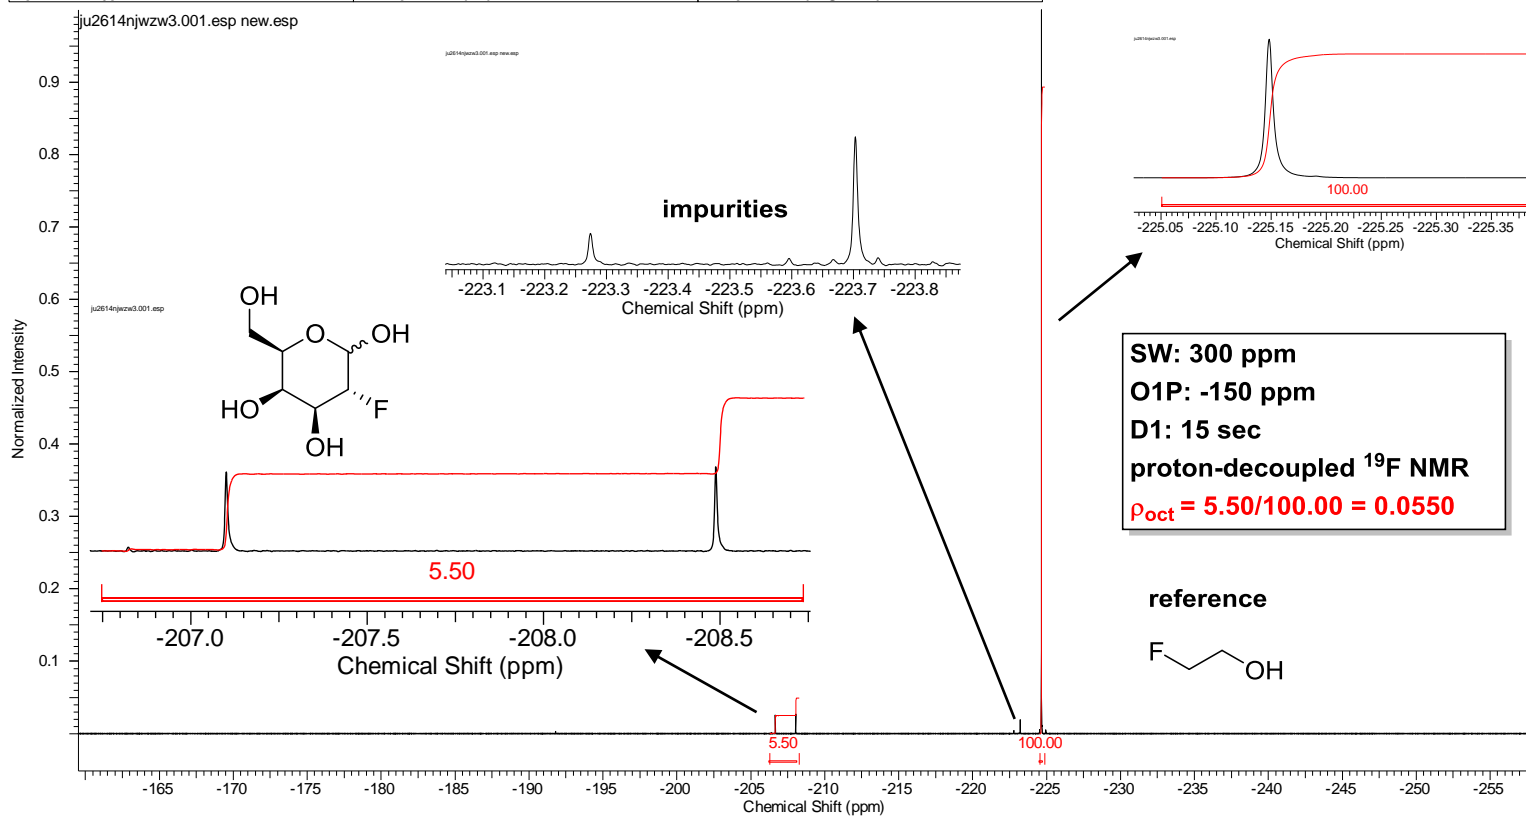

## 14.4. 2-Fluoro-2-deoxy-D-galactose (47), Entry 1, water sample ZW7157-13 wat

ZW7157-13 wat

AVII400 [2]

|                        |                                                                                                                                     |                   |               |                        |                      |
|------------------------|-------------------------------------------------------------------------------------------------------------------------------------|-------------------|---------------|------------------------|----------------------|
| Acquisition Time (sec) | 1.1534                                                                                                                              | Comment           | ZW7157-13 wat | Date                   | 28 Jun 2014 11:05:52 |
| Date Stamp             | 28 Jun 2014 11:05:52                                                                                                                |                   |               |                        |                      |
| File Name              | \\soton.ac.uk\delpersonalfiles\users\zw3g10\mydesktop\Sugar logP NMR (ZW)\ZW7157-13 2-Deoxy-2-fluoro-D-galactose\ju2614njwz4\10\fid |                   |               |                        |                      |
| Frequency (MHz)        | 376.44                                                                                                                              | Nucleus           | 19F           | Number of Transients   | 2687                 |
| Original Points Count  | 131072                                                                                                                              | Owner             | nmr           | Points Count           | 131072               |
| Receiver Gain          | 405.33                                                                                                                              | SW(cyclical) (Hz) | 113636.37     | Solvent                | Acetone              |
| Spectrum Type          | STANDARD                                                                                                                            | Sweep Width (Hz)  | 113635.50     | Temperature (degree C) | 25.119               |
|                        |                                                                                                                                     |                   |               | Spectrum Offset (Hz)   | -56474.6992          |

Current Data Parameters  
 NAME ju2614njwz4  
 EXPNO 10  
 PROCNO 1

F2 - Acquisition Parameters  
 Date 20140628  
 Time 11.06  
 INSTRUM AVII400  
 PROBHD 5 mm SEF 1H/D-  
 PULPROG zgfhigqn.2  
 TD 262144  
 SOLVENT Acetone  
 NS 2687  
 DS 2  
 SWH 113636.367 Hz  
 FIDRES 0.433488 Hz  
 AQ 1.1534336 sec  
 RG 405.33  
 DW 4.400 usec  
 DE 6.50 usec  
 TE 298.1 K  
 D1 15.0000000 sec  
 D11 0.03000000 sec  
 D12 0.00002000 sec  
 TD0 1

===== CHANNEL f1 =====  
 SFO1 376.4418913 MHz  
 NUC1 19F  
 P1 14.50 usec  
 PLW1 10.00000000 W

===== CHANNEL f2 =====  
 SFO2 400.1316005 MHz  
 NUC2 1H  
 CPDPRG[2] waltz16  
 PCPD2 90.00 usec  
 PLW2 20.00000000 W  
 PLW12 0.24691001 W

F2 - Processing parameters  
 SI 131072  
 SF 376.4983660 MHz  
 WDW EM  
 SSB 0  
 LB 0.30 Hz  
 GB 0  
 PC 1.00

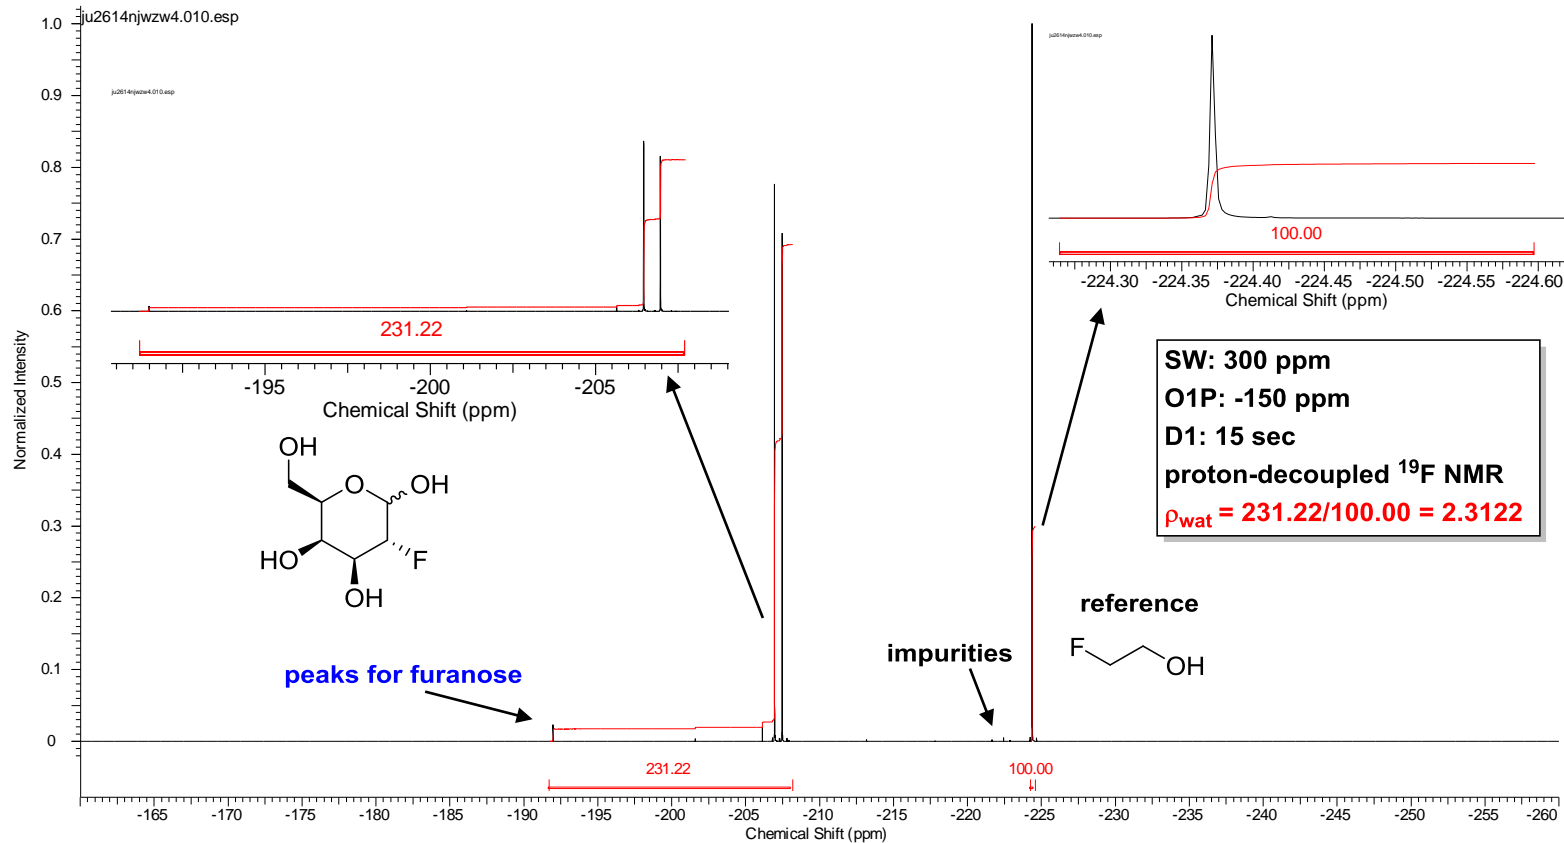



## 14.5. 6-Fluoro-6-deoxy-D-glucose (48), Entry 1, octanol sample

ZW 7601-17 oct

UNIVERSITY OF  
Southampton

AVII400 [2]

Current Data Parameters  
 NAME se1115njzw2  
 EXPNO 1  
 PROCNO 1

F2 - Acquisition Parameters  
 Date\_ 20150915  
 Time 7.52  
 INSTRUM AVII400  
 PROBHD 5 mm SEF 1H/D-  
 PULPROG zgfhigqn.njw  
 TD 262144  
 SOLVENT Acetone  
 NS 4647  
 DS 2  
 SWH 37593.984 Hz  
 FIDRES 0.143410 Hz  
 AQ 3.4865153 sec  
 RG 588.36  
 DW 13.300 usec  
 DE 7.98 usec  
 TE 298.1 K  
 D1 15.00000000 sec  
 D11 0.03000000 sec  
 D12 0.00002000 sec  
 TDO 1

----- CHANNEL f1 -----  
 SFO1 376.4118486 MHz  
 NUC1 19F  
 P1 14.50 usec  
 PLW1 10.00000000 W

----- CHANNEL f2 -----  
 SFO2 400.1316005 MHz  
 NUC2 1H  
 CPDPRG[2] waltz16  
 PCPD2 90.00 usec  
 PLW2 20.00000000 W  
 PLW12 0.24691001 W

F2 - Processing parameters  
 SI 262144  
 SF 376.4980668 MHz  
 WDW EM  
 SSB 0  
 LB 0.15 Hz  
 GB 0  
 PC 1.00

SW: 100 ppm  
 O1P: -230 ppm  
 D1: 15 sec  
 proton-decoupled  $^{19}\text{F}$  NMR  
 $\rho_{\text{Oct}} = 9.92/100.00 = 0.0992$   
 (see next page for detailed  
 integration information after  
 data processing)

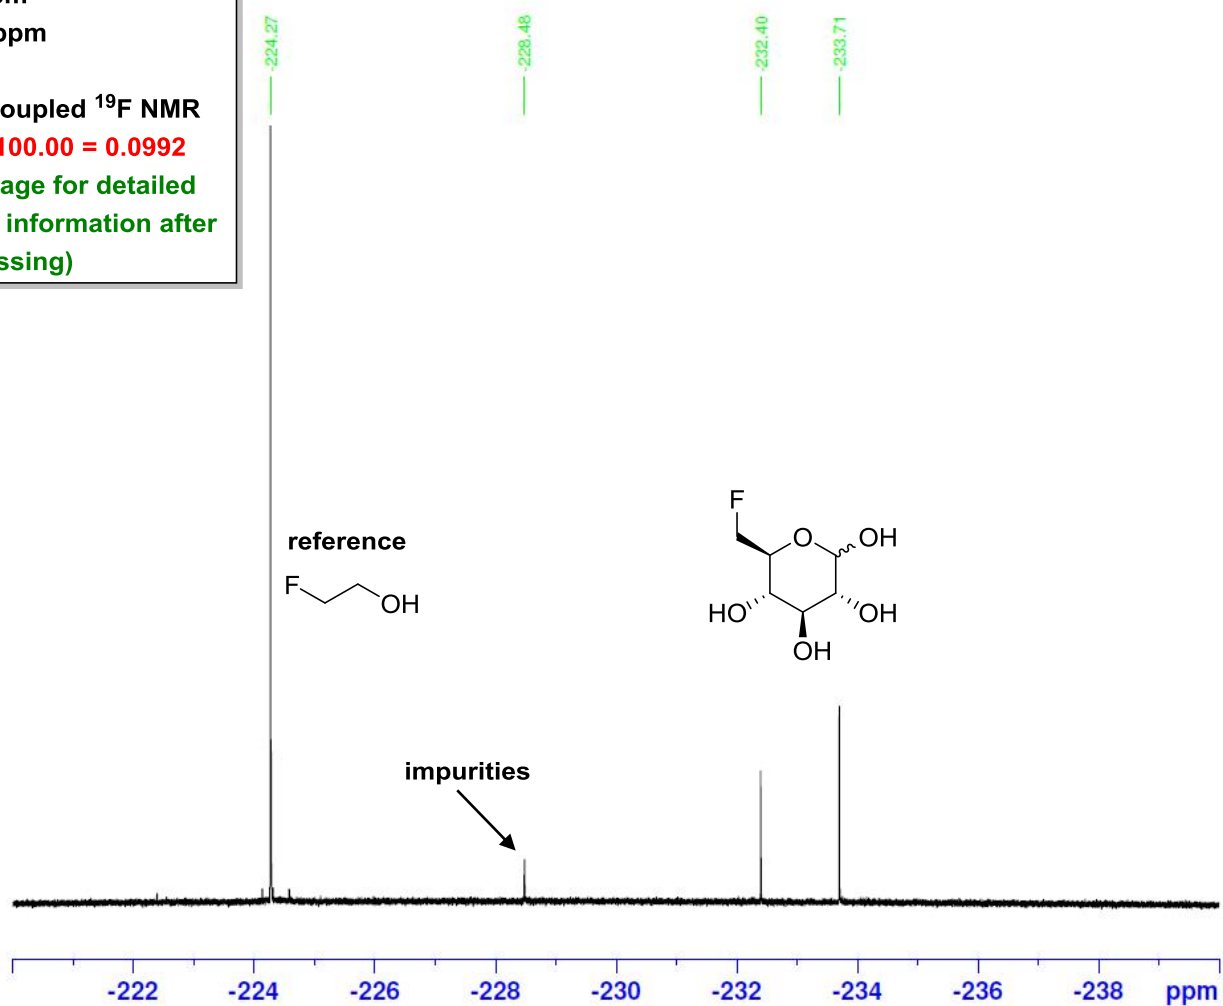

|                        |                      |                   |                                                                                         |                        |                      |                      |               |
|------------------------|----------------------|-------------------|-----------------------------------------------------------------------------------------|------------------------|----------------------|----------------------|---------------|
| Acquisition Time (sec) | 3.4865               | Comment           | ZW 7601-17 oct                                                                          | Date                   | 15 Sep 2015 07:51:44 |                      |               |
| Date Stamp             | 15 Sep 2015 07:51:44 | File Name         | \\soton.ac.uk\ude\personalfiles\users\zw3g10\mydesktop\zw7601-17 6Fgl\se1115njwz2\1\fid |                        |                      |                      |               |
| Frequency (MHz)        | 376.41               | Nucleus           | 19F                                                                                     | Number of Transients   | 4647                 | Origin               | AVII400       |
| Original Points Count  | 131072               | Owner             | nmr                                                                                     | Points Count           | 524288               | Pulse Sequence       | zgfhighgn.njw |
| Receiver Gain          | 588.36               | SW(cyclical) (Hz) | 37593.98                                                                                | Solvent                | Acetone              | Spectrum Offset (Hz) | -86517.4453   |
| Spectrum Type          | STANDARD             | Sweep Width (Hz)  | 37593.91                                                                                | Temperature (degree C) | 25.119               |                      |               |

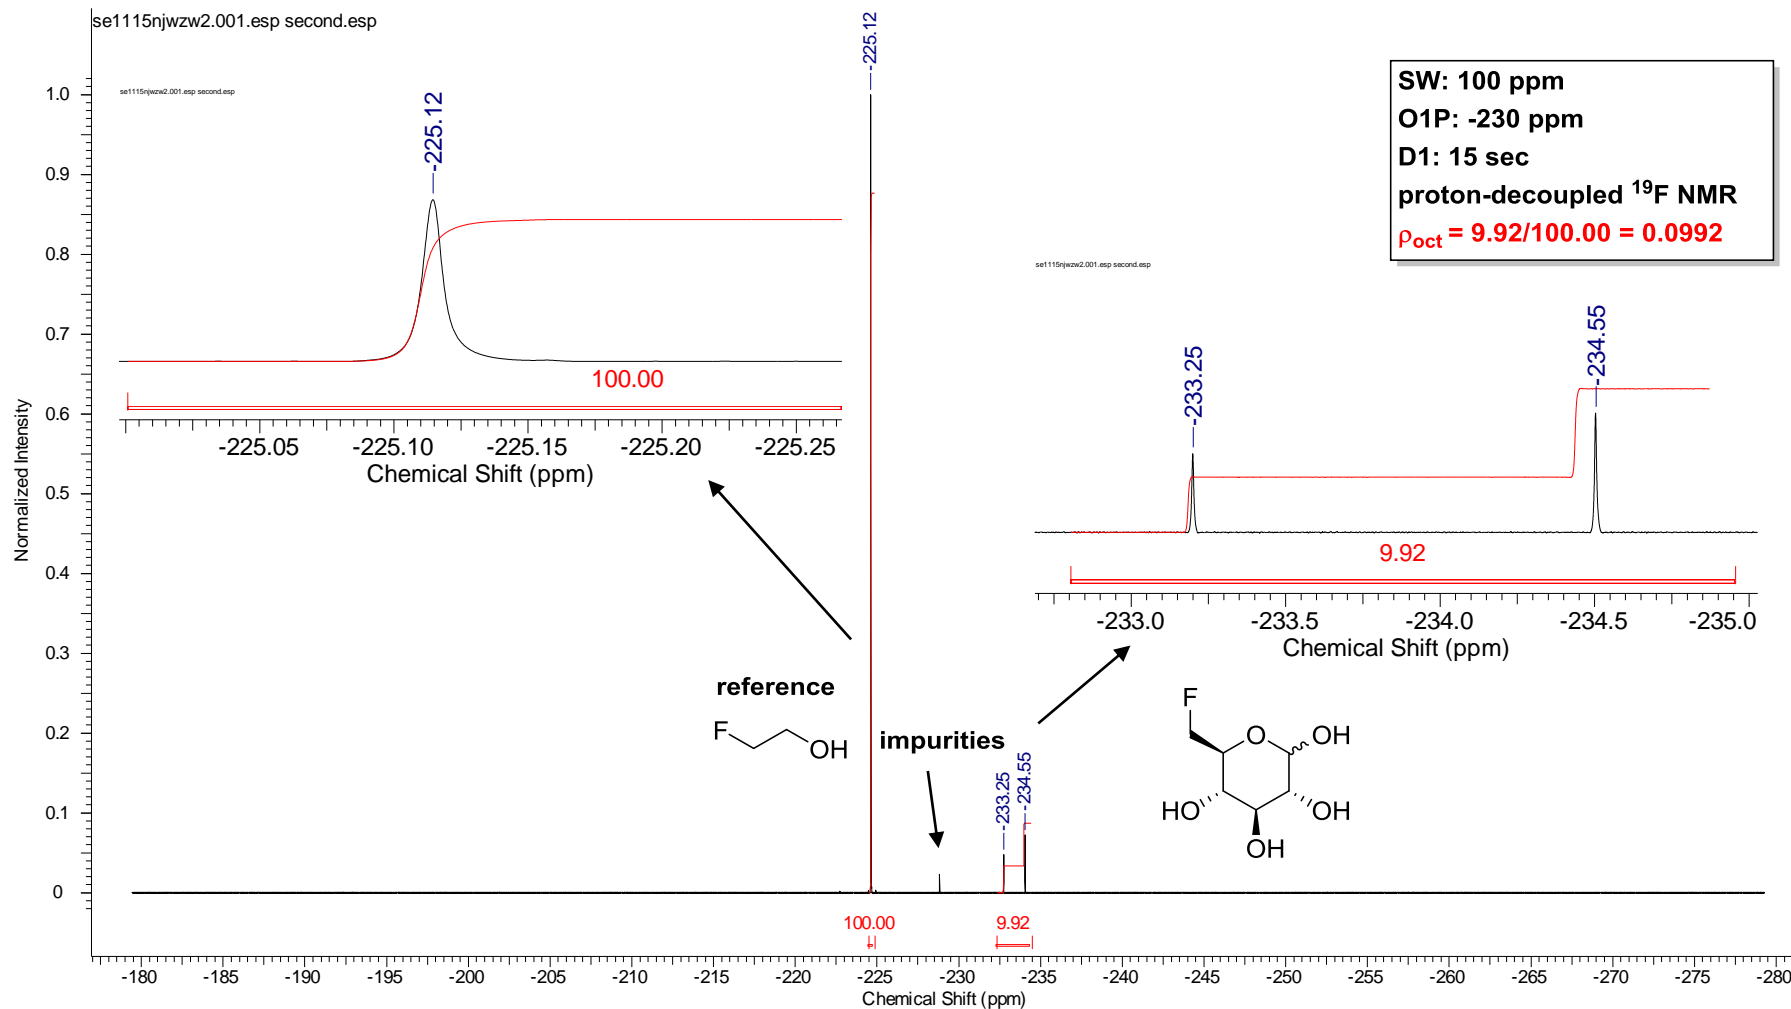

## 14.6. 6-Flouro-6-deoxy-D-glucose (48), Entry 1, water sample

ZW 7601-17 wat

SW: 100 ppm  
 O1P: -230 ppm  
 D1: 15 sec  
 proton-decoupled  $^{19}\text{F}$  NMR  
 $\rho_{\text{wat}} = 398.88/100.00 = 3.9888$   
 (see next page for detailed  
 integration information after  
 data processing)

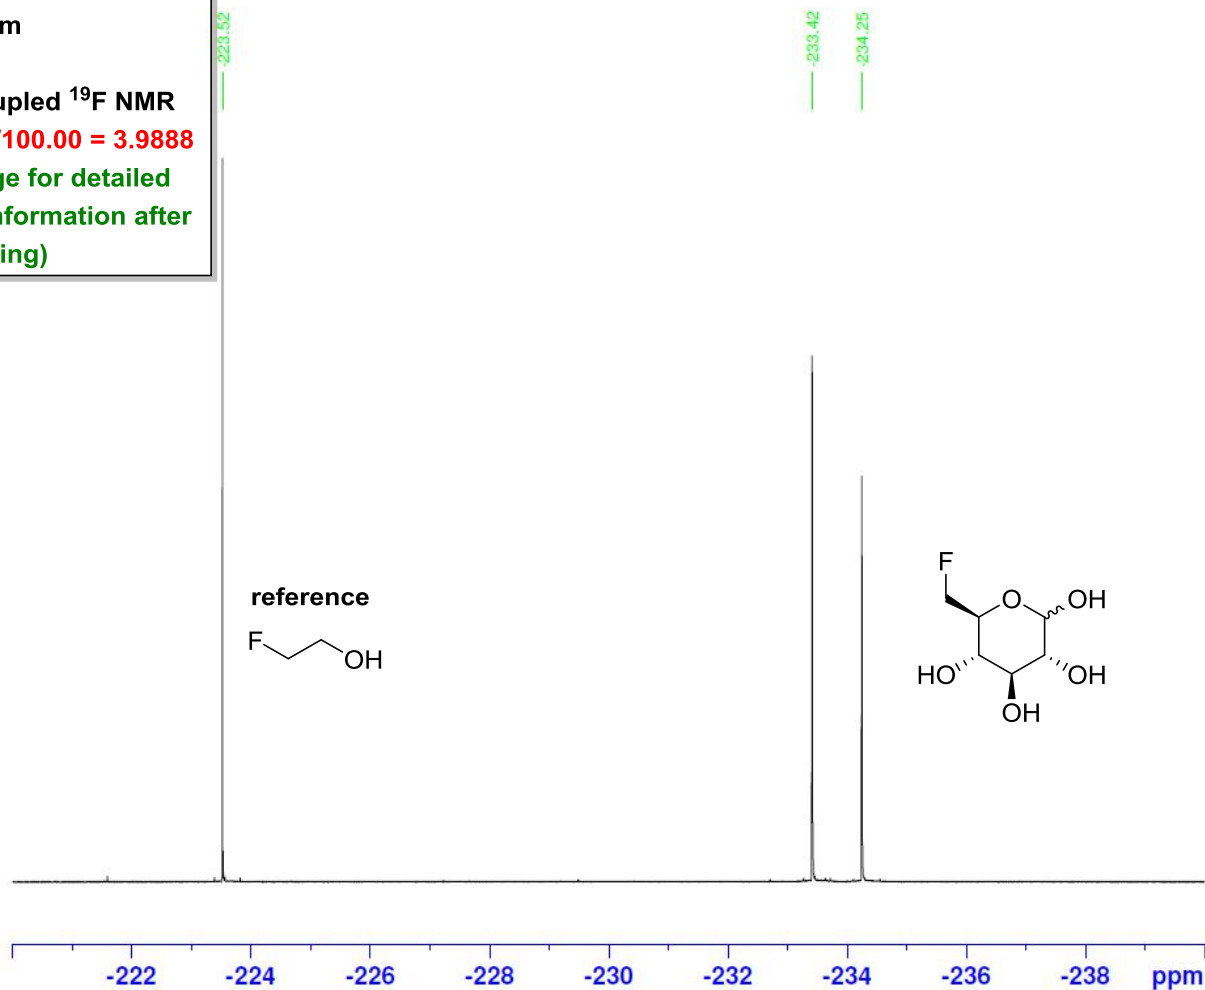

UNIVERSITY OF  
 Southampton

AVII400 [2]

Current Data Parameters  
 NAME se1115njwz1  
 EXPNO 1  
 PROCNO 1

F2 - Acquisition Parameters  
 Date\_ 20150911  
 Time 11.56  
 INSTRUM AVII400  
 PROBHD 5 mm SEF 1H/D-  
 PULPROG zgfhigqn.njw  
 TD 262144  
 SOLVENT Acetone  
 NS 512  
 DS 2  
 SWH 37593.984 Hz  
 FIDRES 0.143410 Hz  
 AQ 3.4865153 sec  
 RG 373.48  
 DW 13.300 usec  
 DE 7.98 usec  
 TE 298.1 K  
 D1 15.00000000 sec  
 D11 0.03000000 sec  
 D12 0.00002000 sec  
 TD0 1

===== CHANNEL f1 =====  
 SFO1 376.4118711 MHz  
 NUC1  $^{19}\text{F}$   
 P1 14.50 usec  
 PLW1 10.00000000 W

===== CHANNEL f2 =====  
 SFO2 400.1316005 MHz  
 NUC2  $^1\text{H}$   
 CPDPRG[2] waltz16  
 PCPD2 90.00 usec  
 PLW2 20.00000000 W  
 PLW12 0.24691001 W

F2 - Processing parameters  
 SI 262144  
 SF 376.4980668 MHz  
 WDW EM  
 SSB 0  
 LB 0.15 Hz  
 GB 0  
 PC 1.00

|                        |                      |                   |                                                                                        |                        |                      |
|------------------------|----------------------|-------------------|----------------------------------------------------------------------------------------|------------------------|----------------------|
| Acquisition Time (sec) | 3.4865               | Comment           | ZW 7601-17 wat                                                                         | Date                   | 11 Sep 2015 11:57:04 |
| Date Stamp             | 11 Sep 2015 11:57:04 | File Name         | \\soton.ac.uk\ude\personalfiles\users\zw3g10\mydesktop\zw7601-17 6Fgl\se1115njwz\1\fid |                        |                      |
| Frequency (MHz)        | 376.41               | Nucleus           | 19F                                                                                    | Number of Transients   | 512                  |
| Original Points Count  | 131072               | Owner             | nmr                                                                                    | Points Count           | 524288               |
| Receiver Gain          | 373.48               | SW(cyclical) (Hz) | 37593.98                                                                               | Solvent                | Acetone              |
| Spectrum Type          | STANDARD             | Sweep Width (Hz)  | 37593.91                                                                               | Temperature (degree C) | 25.119               |
|                        |                      |                   |                                                                                        | Origin                 | AVII400              |
|                        |                      |                   |                                                                                        | Pulse Sequence         | zgfhighn.njw         |
|                        |                      |                   |                                                                                        | Spectrum Offset (Hz)   | -86494.8516          |

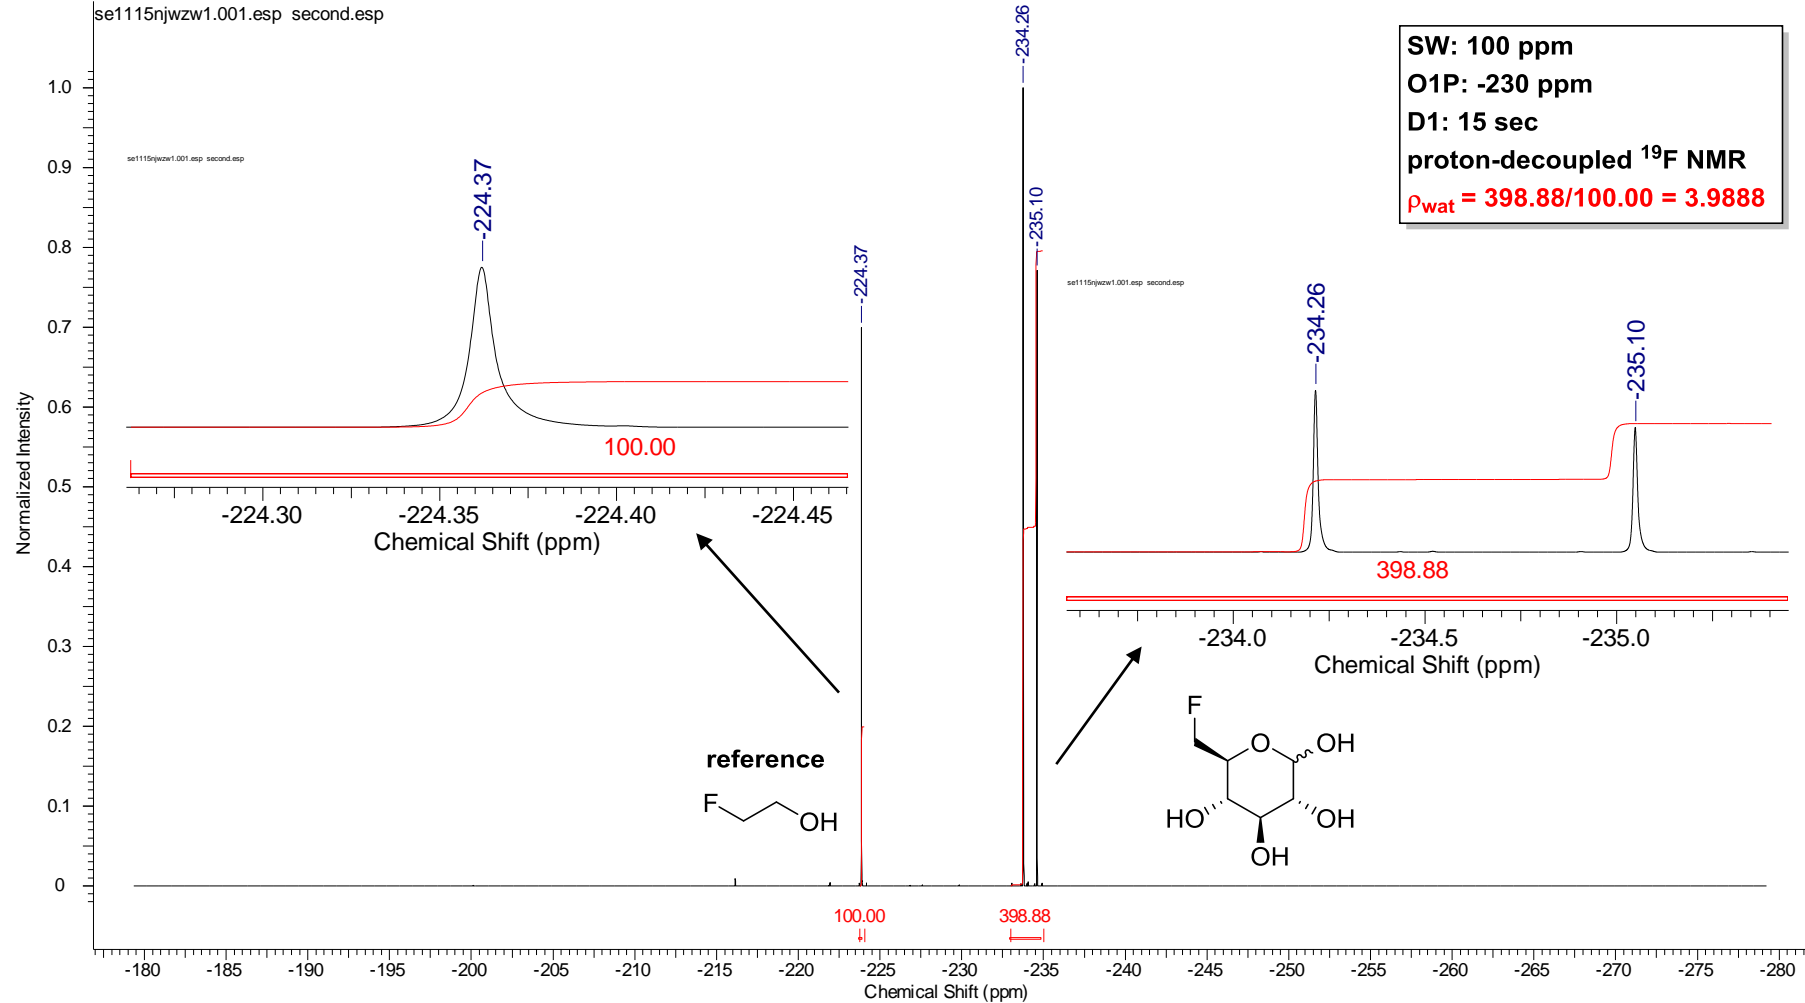

## 14.7. 6-Fluoro-6-deoxy-D-glucose (48), Entry 2, octanol sample

ZW 7601-19 oct

SW: 100 ppm  
 O1P: -230 ppm  
 D1: 15 sec  
 proton-decoupled  $^{19}\text{F}$  NMR  
 $\rho_{\text{oct}} = 11.82/100.00 = 0.1182$   
 (see next page for detailed  
 integration information after  
 data processing)

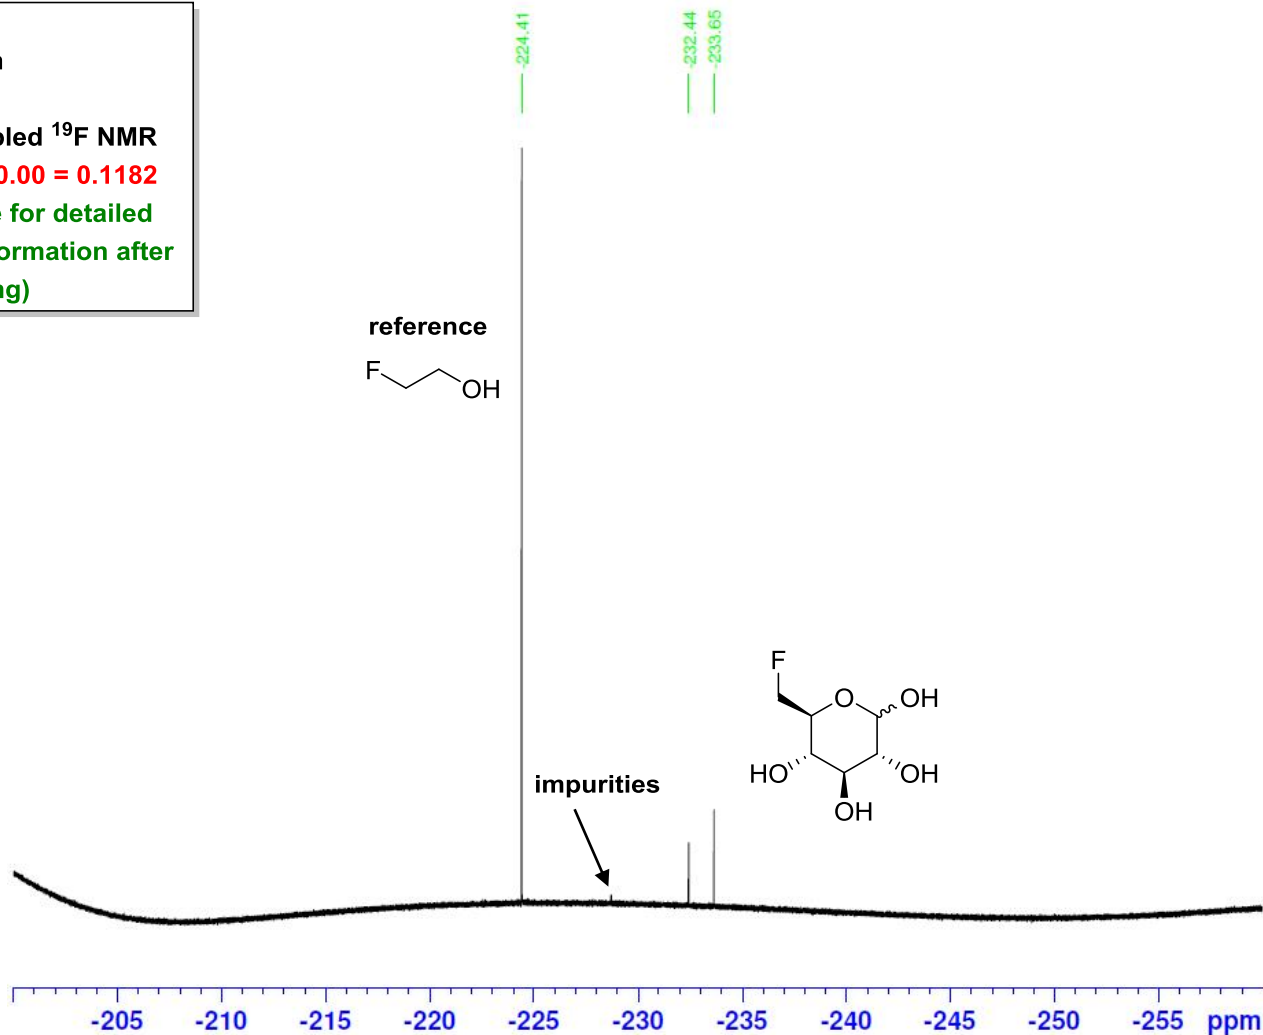

UNIVERSITY OF  
 Southampton

AVII400 [2]

Current Data Parameters  
 NAME oc0215njwz1  
 EXPNO 1  
 PROCNO 1

F2 - Acquisition Parameters  
 Date 20151004  
 Time 15.49  
 INSTRUM AVII400  
 PROBHD 5 mm SEF 1H/D-  
 PULPROG zgfhgqn.njw  
 TD 262144  
 SOLVENT Acetone  
 NS 9216  
 DS 2  
 SWH 37593.984 Hz  
 FIDRES 0.143410 Hz  
 AQ 3.4865153 sec  
 RG 128.42  
 DW 13.300 usec  
 DE 7.98 usec  
 TE 298.1 K  
 D1 15.00000000 sec  
 D11 0.03000000 sec  
 D12 0.00002000 sec  
 TD0 1

===== CHANNEL f1 =====  
 SFO1 376.4117714 MHz  
 NUC1  $^{19}\text{F}$   
 P1 14.50 usec  
 PLW1 10.00000000 W

===== CHANNEL f2 =====  
 SFO2 400.1316005 MHz  
 NUC2  $^1\text{H}$   
 CPDPRG[2] waltz16  
 PCPD2 90.00 usec  
 PLW2 20.00000000 W  
 PLW12 0.24691001 W

F2 - Processing parameters  
 SI 262144  
 SF 376.4980668 MHz  
 WDW EM  
 SSB 0  
 LB 0.15 Hz  
 GB 0  
 PC 1.00

|                        |                      |                   |                                                                         |                        |                      |                      |              |
|------------------------|----------------------|-------------------|-------------------------------------------------------------------------|------------------------|----------------------|----------------------|--------------|
| Acquisition Time (sec) | 3.4865               | Comment           | ZW 7601-19 oct                                                          | Date                   | 04 Oct 2015 15:49:36 |                      |              |
| Date Stamp             | 04 Oct 2015 15:49:36 | File Name         | \\soton.ac.uk\ude\personalfiles\users\zw3g10\mydesktop\oc0215njwz1\1fid |                        |                      |                      |              |
| Frequency (MHz)        | 376.41               | Nucleus           | 19F                                                                     | Number of Transients   | 9216                 | Origin               | AVII400      |
| Original Points Count  | 131072               | Owner             | nmr                                                                     | Points Count           | 524288               | Pulse Sequence       | zgfhighn.njw |
| Receiver Gain          | 128.42               | SW(cyclical) (Hz) | 37593.98                                                                | Solvent                | Acetone              | Spectrum Offset (Hz) | -86594.6250  |
| Spectrum Type          | STANDARD             | Sweep Width (Hz)  | 37593.91                                                                | Temperature (degree C) | 25.119               |                      |              |

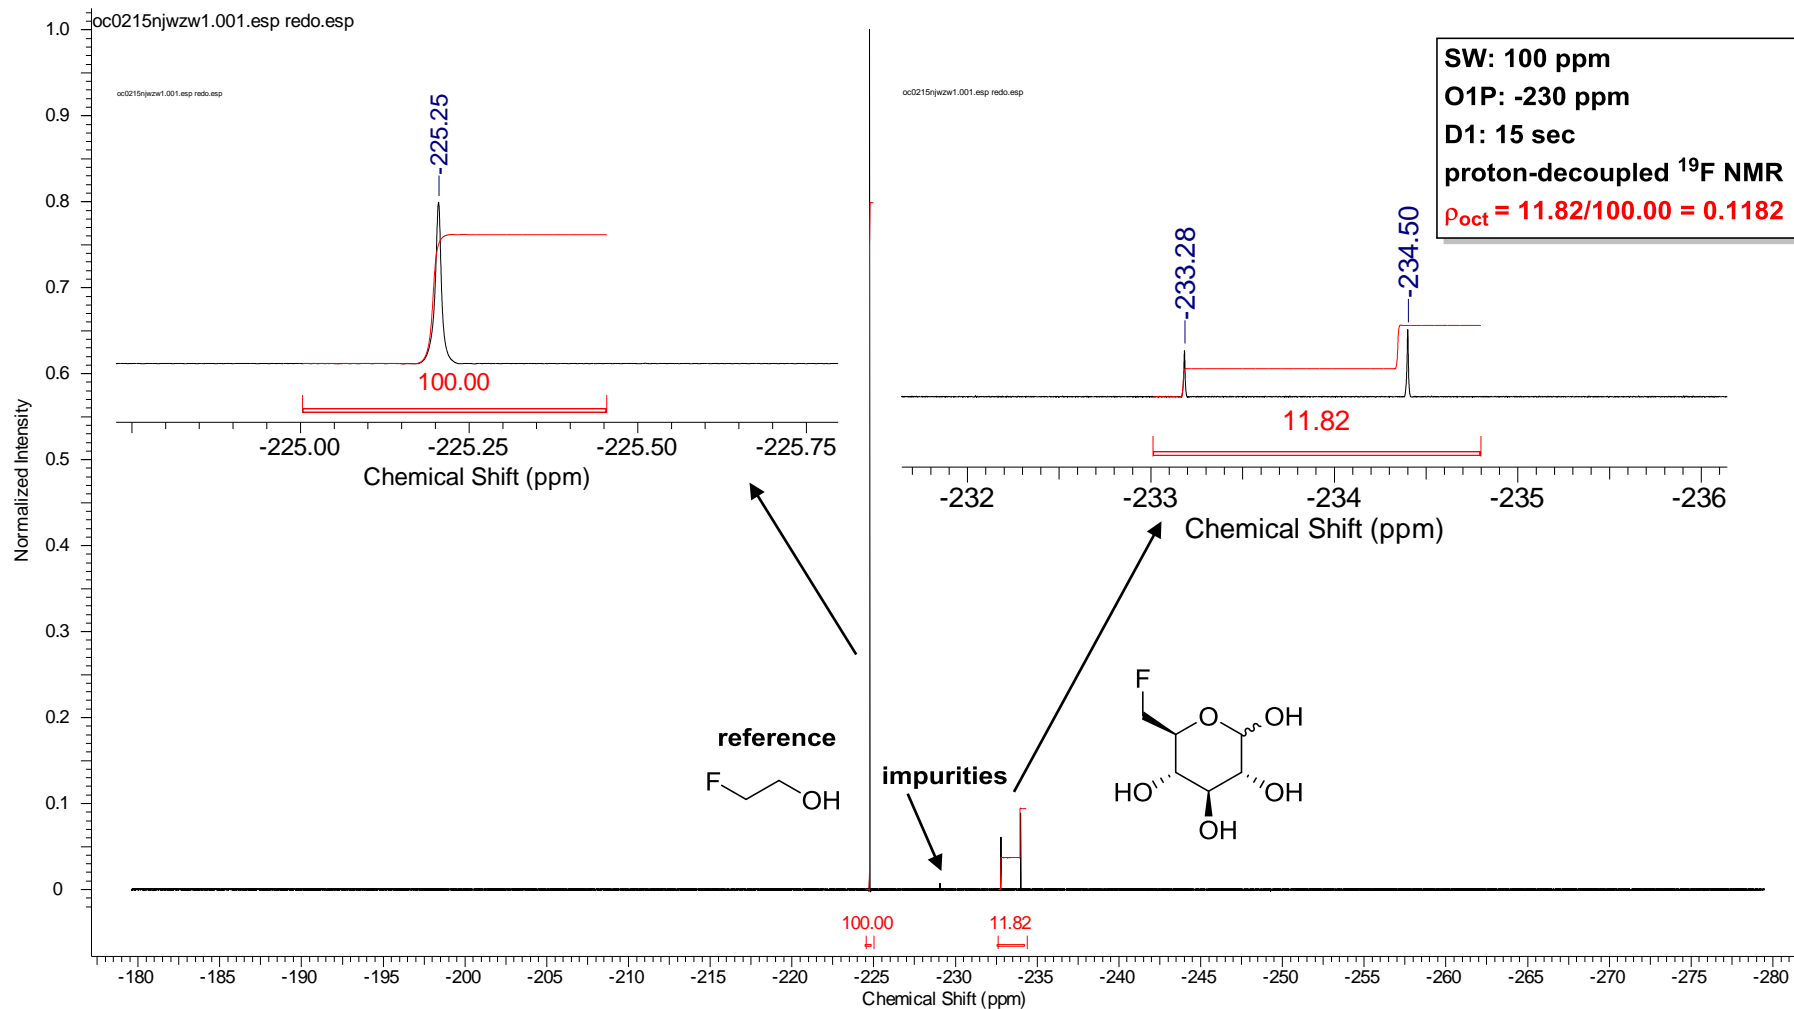

## 14.8. 6-Fluoro-6-deoxy-D-glucose (48), Entry 2, water sample

ZW 7601-19 wat

UNIVERSITY OF  
Southampton

AVII400 [2]

Current Data Parameters  
 NAME se3015njwz1  
 EXPNO 1  
 PROCNO 1

F2 - Acquisition Parameters  
 Date\_ 20151001  
 Time\_ 12.57  
 INSTRUM AVII400  
 PROBHD 5 mm SEF 1H/D-  
 PULPROG zgfhigqn.njw  
 TD 262144  
 SOLVENT Acetone  
 NS 512  
 DS 2  
 SWH 37593.984 Hz  
 FIDRES 0.143410 Hz  
 AQ 3.4865153 sec  
 RG 63.4  
 DW 13.300 usec  
 DE 7.98 usec  
 TE 298.1 K  
 D1 15.00000000 sec  
 D11 0.03000000 sec  
 D12 0.00002000 sec  
 TD0 1

===== CHANNEL f1 =====  
 SFO1 376.4117714 MHz  
 NUC1 19F  
 P1 14.50 usec  
 PLW1 10.00000000 W

===== CHANNEL f2 =====  
 SFO2 400.1316005 MHz  
 NUC2 1H  
 CPDPRG[2] waltz16  
 PCPD2 90.00 usec  
 PLW2 20.00000000 W  
 PLW12 0.24691001 W

F2 - Processing parameters  
 SI 262144  
 SF 376.4980668 MHz  
 WDW EM  
 SSB 0  
 LB 0.15 Hz  
 GB 0  
 PC 1.00

SW: 100 ppm  
 O1P: -230 ppm  
 D1: 15 sec  
 proton-decoupled <sup>19</sup>F NMR  
 $\rho_{\text{wat}} = 477.41/100.00 = 4.7741$   
 (see next page for detailed  
 integration information after  
 data processing)

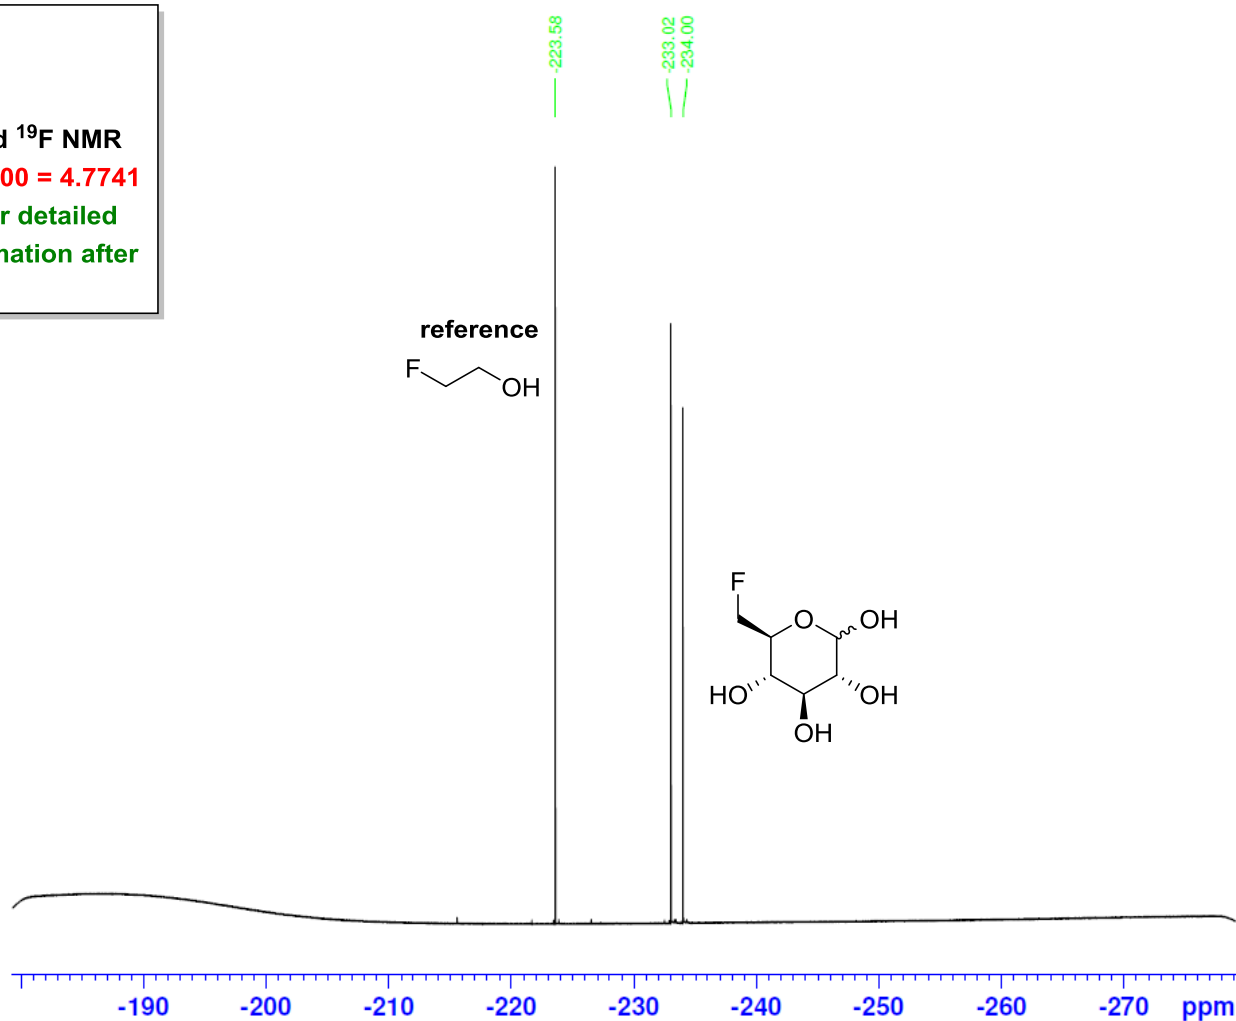

|                        |                      |                   |                                                                           |                        |                      |                      |              |
|------------------------|----------------------|-------------------|---------------------------------------------------------------------------|------------------------|----------------------|----------------------|--------------|
| Acquisition Time (sec) | 3.4865               | Comment           | ZW 7601-19 wat                                                            | Date                   | 01 Oct 2015 12:56:48 |                      |              |
| Date Stamp             | 01 Oct 2015 12:56:48 | File Name         | \\soton.ac.uk\udel\personalfiles\users\zw3g10\mydesktop\se3015njwz1\1\fid |                        |                      |                      |              |
| Frequency (MHz)        | 376.41               | Nucleus           | 19F                                                                       | Number of Transients   | 512                  | Origin               | AVII400      |
| Original Points Count  | 131072               | Owner             | nmr                                                                       | Points Count           | 524288               | Pulse Sequence       | zgfhighn.njw |
| Receiver Gain          | 63.40                | SW(cyclical) (Hz) | 37593.98                                                                  | Solvent                | Acetone              | Spectrum Offset (Hz) | -86594.6250  |
| Spectrum Type          | STANDARD             | Sweep Width (Hz)  | 37593.91                                                                  | Temperature (degree C) | 25.119               |                      |              |

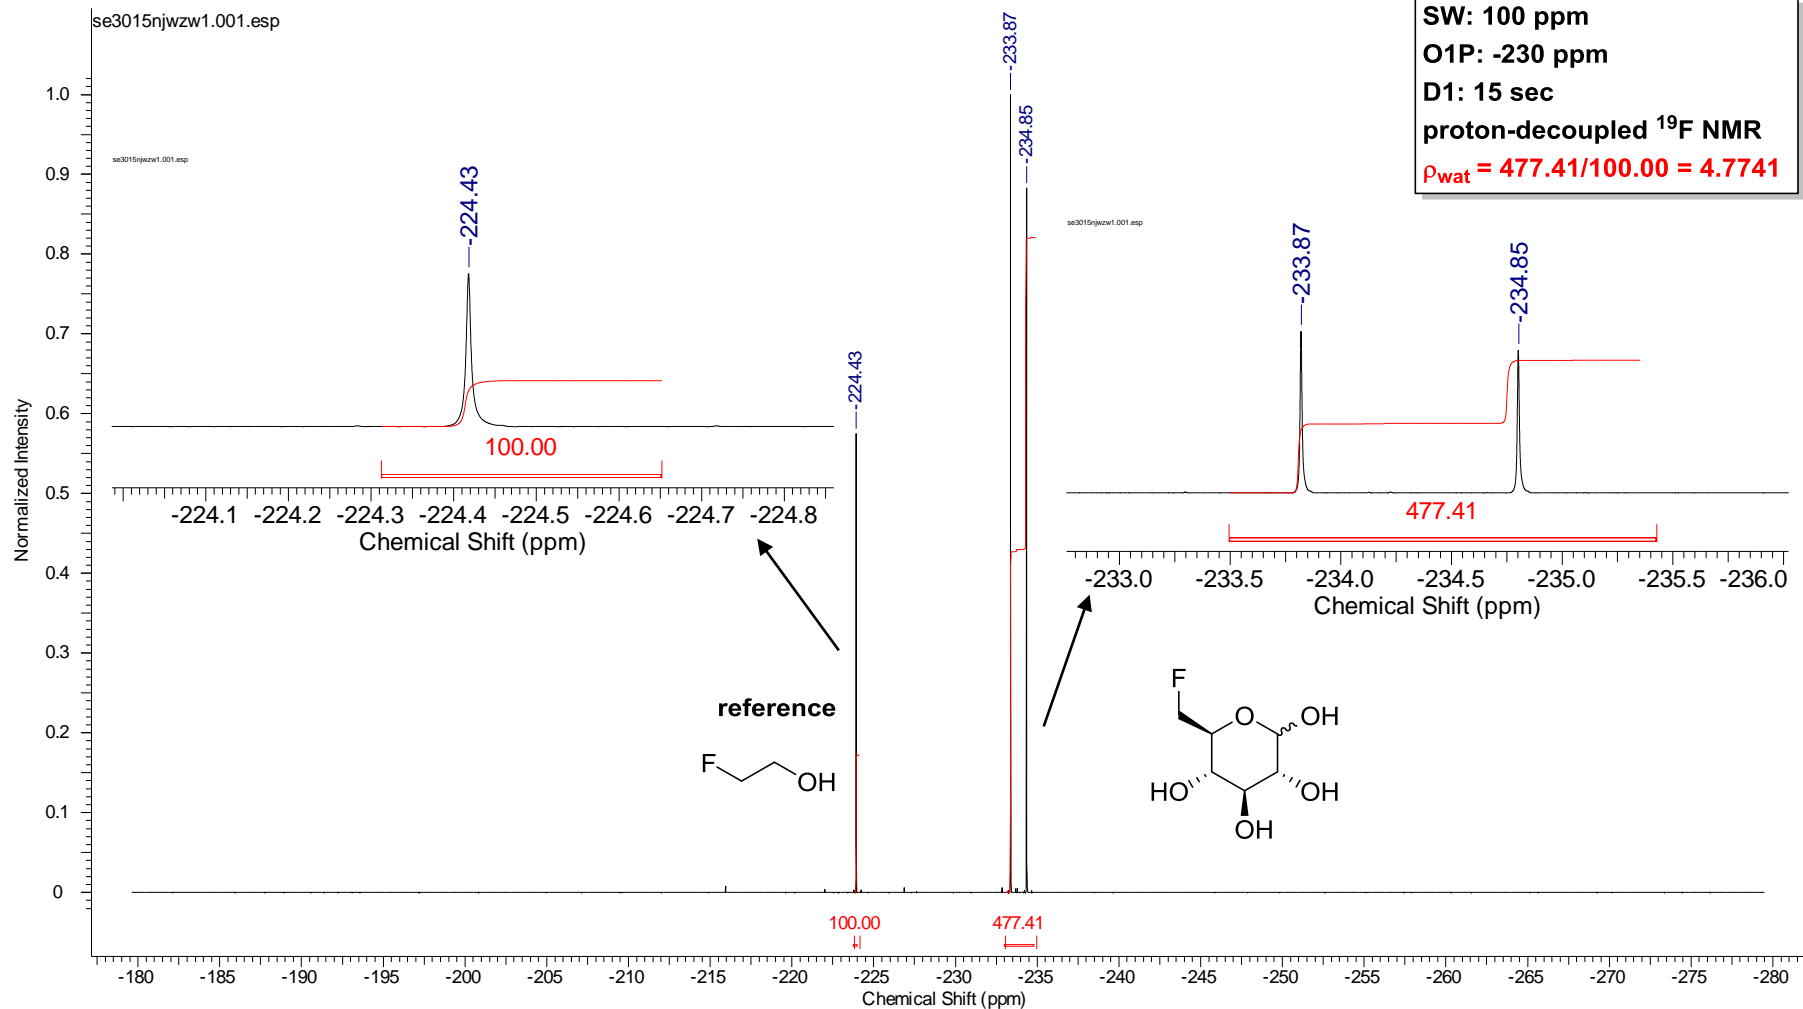



## 14.9. 2-Fluoro-2-deoxy-D-glucose (49), Entry 1, octanol sample

ZW7157-12 oct

UNIVERSITY OF  
Southampton

AVII400 [2]

ZW7157-12 oct

|                        |                                                                                                                                                |                   |               |                        |                      |
|------------------------|------------------------------------------------------------------------------------------------------------------------------------------------|-------------------|---------------|------------------------|----------------------|
| Acquisition Time (sec) | 1.1534                                                                                                                                         | Comment           | ZW7157-12 oct | Date                   | 26 Jun 2014 09:17:04 |
| Date Stamp             | 26 Jun 2014 09:17:04                                                                                                                           |                   |               |                        |                      |
| File Name              | \\soton.ac.uk\ude\personalfiles\users\zw3g10\mydesktop\logP_project\Sugar logP NMR (ZW)\ZW7157-12 2-Deoxy-2-fluoro-D-glucose\ju2614njwz1\1\fid |                   |               |                        |                      |
| Frequency (MHz)        | 376.44                                                                                                                                         | Nucleus           | 19F           | Number of Transients   | 3296                 |
| Original Points Count  | 131072                                                                                                                                         | Owner             | nmr           | Points Count           | 524288               |
| Receiver Gain          | 500.47                                                                                                                                         | SW(cyclical) (Hz) | 113636.37     | Solvent                | Acetone              |
| Spectrum Type          | STANDARD                                                                                                                                       | Sweep Width (Hz)  | 113636.15     | Temperature (degree C) | 25.245               |
|                        |                                                                                                                                                |                   |               | Origin                 | AVII400              |
|                        |                                                                                                                                                |                   |               | Pulse Sequence         | zgfhigqn.2           |
|                        |                                                                                                                                                |                   |               | Spectrum Offset (Hz)   | -56474.6992          |

Current Data Parameters  
 NAME ju2614njwz1  
 EXPNO 1  
 PROCNO 1

F2 - Acquisition Parameters  
 Date 20140626  
 Time 9.16  
 INSTRUM AVII400  
 PROBHD 5 mm SEF 1H/D-  
 PULPROG zgfhigqn.2  
 TD 262144  
 SOLVENT Acetone  
 NS 3296  
 DS 2  
 SWH 113636.367 Hz  
 FIDRES 0.433488 Hz  
 AQ 1.1534336 sec  
 RG 500.47  
 DW 4.400 usec  
 DE 6.50 usec  
 TE 298.2 K  
 D1 15.00000000 sec  
 D11 0.03000000 sec  
 D12 0.00002000 sec  
 TD0 1

===== CHANNEL f1 =====  
 SFO1 376.4418913 MHz  
 NUC1 19F  
 P1 14.50 usec  
 PLW1 10.00000000 W

===== CHANNEL f2 =====  
 SFO2 400.1316005 MHz  
 NUC2 1H  
 CPDPRG2 waltz16  
 PCPD2 90.00 usec  
 PLW2 20.00000000 W  
 PLW12 0.24691001 W

F2 - Processing parameters  
 SI 131072  
 SF 376.4983660 MHz  
 WDW EM  
 SSB 0  
 LB 0.30 Hz  
 GB 0  
 PC 1.00

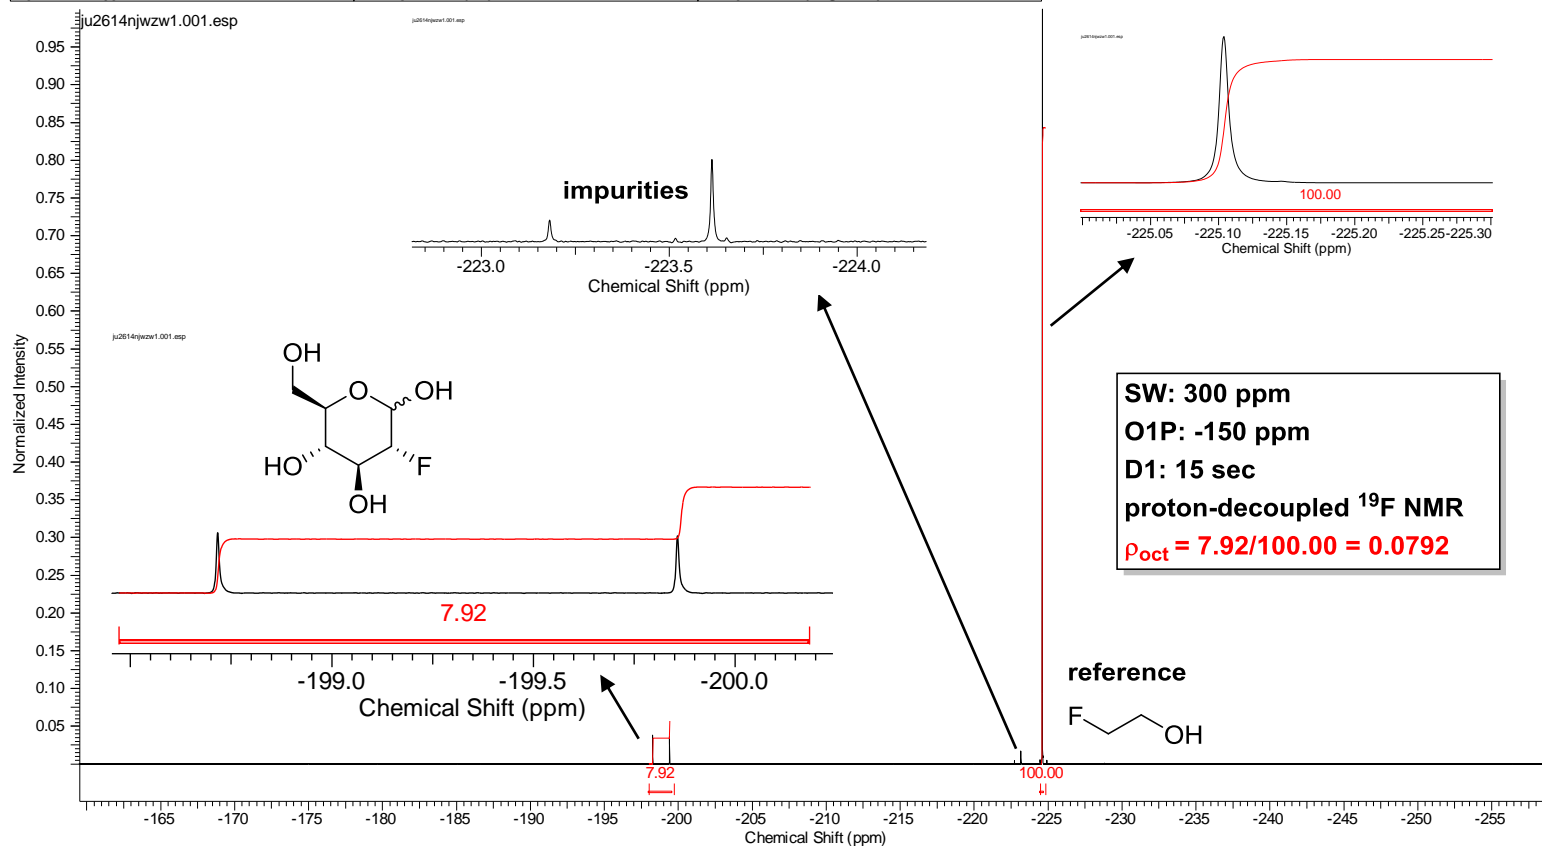



## 14.11. 2-Fluoro-2-deoxy-D-mannose (50), Entry 1, octanol sample

ZW7157-15 oct

UNIVERSITY OF  
Southampton

AVII400 [2]

ZW7157-15 oct

|                        |                                                                                                                                                |                   |                 |                        |                      |
|------------------------|------------------------------------------------------------------------------------------------------------------------------------------------|-------------------|-----------------|------------------------|----------------------|
| Acquisition Time (sec) | 1.1534                                                                                                                                         | Comment           | ZW7157-15 oct   | Date                   | 29 Jun 2014 12:50:24 |
| Date Stamp             | 29 Jun 2014 12:50:24                                                                                                                           |                   |                 |                        |                      |
| File Name              | \\soton.ac.uk\ude\personalfiles\users\zw3g10\mydesktop\logP project\Sugar logP NMR (ZW)\ZW7157-15 2-Deoxy-2-fluoro-D-mannose\ju2614njzw7\1\fid |                   |                 |                        |                      |
| Frequency (MHz)        | 376.44                                                                                                                                         | Nucleus           | <sup>19</sup> F | Number of Transients   | 3296                 |
| Original Points Count  | 131072                                                                                                                                         | Owner             | nmr             | Points Count           | 524288               |
| Receiver Gain          | 500.47                                                                                                                                         | SW(cyclical) (Hz) | 113636.37       | Solvent                | Acetone              |
| Spectrum Type          | STANDARD                                                                                                                                       | Sweep Width (Hz)  | 113636.15       | Temperature (degree C) | 25.119               |
|                        |                                                                                                                                                |                   |                 | Origin                 | AVII400              |
|                        |                                                                                                                                                |                   |                 | Pulse Sequence         | zgfhighn.2           |
|                        |                                                                                                                                                |                   |                 | Spectrum Offset (Hz)   | -56474.6992          |

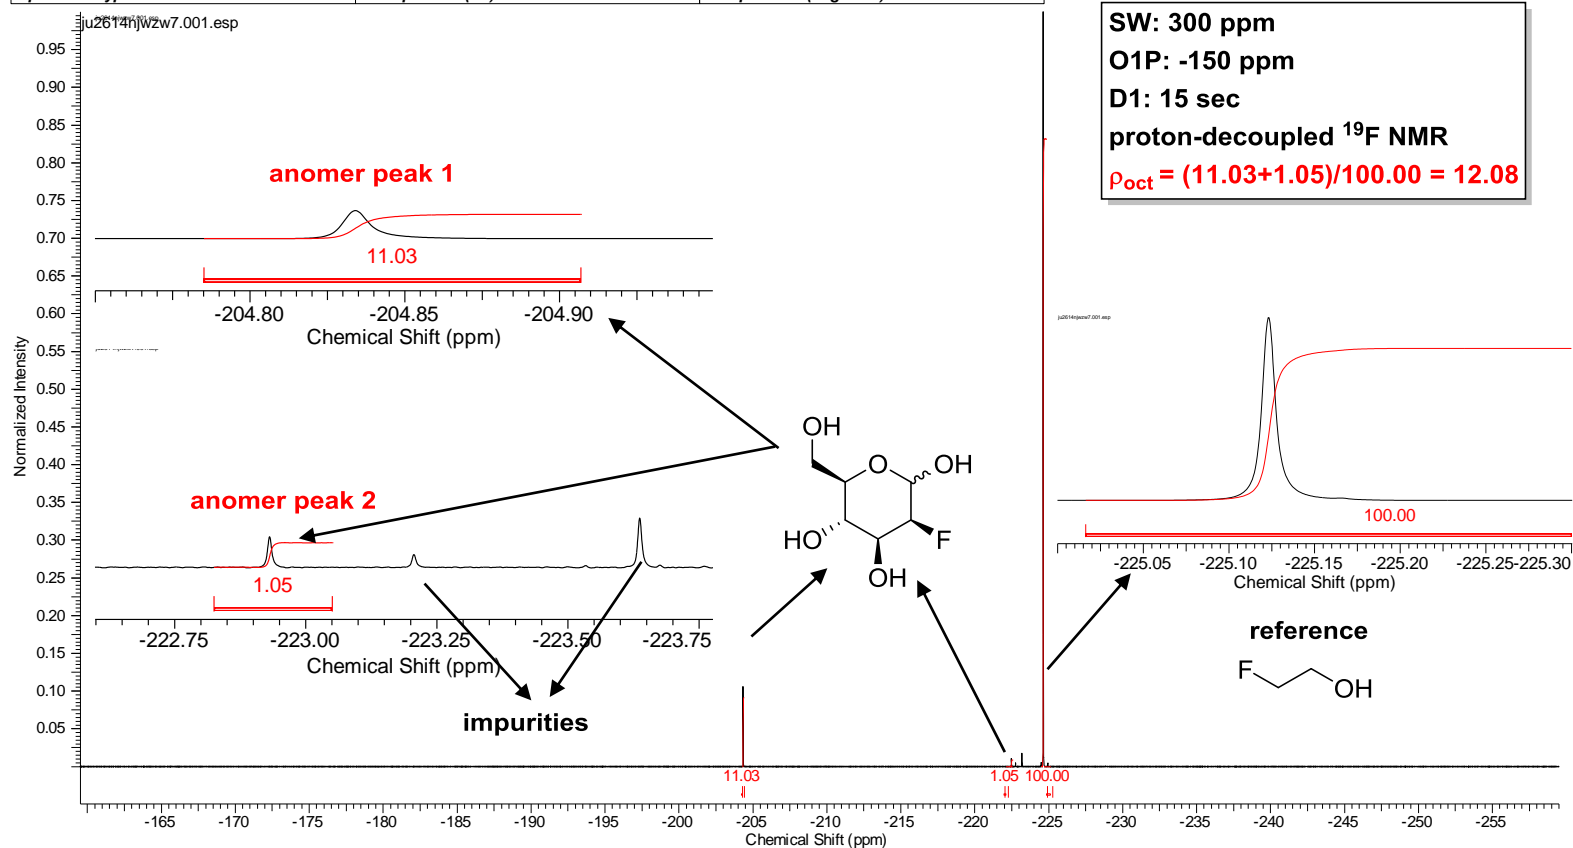

## Current Data Parameters

NAME ju2614njzw7  
 EXPNO 1  
 PROCNO 1

## F2 - Acquisition Parameters

Date 20140629  
 Time 12.51  
 INSTRUM AVII400  
 PROBHD 5 mm SEF 1H/D-  
 PULPROG zgfhighn.2  
 TD 262144  
 SOLVENT Acetone  
 NS 3296  
 DS 2  
 SWH 113636.367 Hz  
 FIDRES 0.433488 Hz  
 AQ 1.1534336 sec  
 RG 500.47  
 DW 4.400 usec  
 DE 6.50 usec  
 TE 298.1 K  
 D1 15.00000000 sec  
 D11 0.03000000 sec  
 D12 0.00002000 sec  
 TD0 1

## ===== CHANNEL f1 =====

SFO1 376.4418913 MHz  
 NUC1 <sup>19</sup>F  
 P1 14.50 usec  
 PLW1 10.00000000 W

## ===== CHANNEL f2 =====

SFO2 400.1316005 MHz  
 NUC2 <sup>1</sup>H  
 CPDPRG[2] waltz16  
 PCPD2 90.00 usec  
 PLW2 20.00000000 W  
 PLW12 0.24691001 W

## F2 - Processing parameters

SI 131072  
 SF 376.4983660 MHz  
 WDW EM  
 SSB 0  
 LB 0.30 Hz  
 GB 0  
 PC 1.00

## 14.12. 2-Fluoro-2-deoxy-D-mannose (50), Entry 1, water sample

ZW7157-15 wat

UNIVERSITY OF  
Southampton

AVII400 [2]

ZW7157-15 wat

| Acquisition Time (sec) | 1.1534                                                                                                                                         | Comment           | ZW7157-15 wat | Date                   | 30 Jun 2014 11:31:28 |
|------------------------|------------------------------------------------------------------------------------------------------------------------------------------------|-------------------|---------------|------------------------|----------------------|
| Date Stamp             | 30 Jun 2014 11:31:28                                                                                                                           |                   |               |                        |                      |
| File Name              | \\soton.ac.uk\lud\personalfiles\users\zw3g10\mydesktop\logP project\Sugar logP NMR (ZW)\ZW7157-15 2-Deoxy-2-fluoro-D-mannose\ju2614njzw8\1\fid |                   |               |                        |                      |
| Frequency (MHz)        | 376.44                                                                                                                                         | Nucleus           | 19F           | Number of Transients   | 427                  |
| Original Points Count  | 131072                                                                                                                                         | Owner             | nmr           | Points Count           | 524288               |
| Receiver Gain          | 405.33                                                                                                                                         | SW(cyclical) (Hz) | 113636.37     | Solvent                | Acetone              |
| Spectrum Type          | STANDARD                                                                                                                                       | Sweep Width (Hz)  | 113636.15     | Temperature (degree C) | 25.119               |
|                        |                                                                                                                                                |                   |               | Origin                 | AVII400              |
|                        |                                                                                                                                                |                   |               | Pulse Sequence         | zgfhigqn.2           |
|                        |                                                                                                                                                |                   |               | Spectrum Offset (Hz)   | -56474.6992          |

Current Data Parameters  
 NAME ju2614njzw8  
 EXPNO 1  
 PROCNO 1

F2 - Acquisition Parameters  
 Date 20140630  
 Time 11.32  
 INSTRUM AVII400  
 PROBHD 5 mm SEF 1H/D-  
 PULPROG zgfhigqn.2  
 TD 262144  
 SOLVENT Acetone  
 NS 427  
 DS 2  
 SWH 113636.367 Hz  
 FIDRES 0.433488 Hz  
 AQ 1.1534336 sec  
 RG 405.33  
 DW 4.400 usec  
 DE 6.50 usec  
 TE 298.1 K  
 D1 15.00000000 sec  
 D11 0.03000000 sec  
 D12 0.00002000 sec  
 TDO 1

===== CHANNEL f1 =====  
 SFO1 376.4418913 MHz  
 NUC1 19F  
 P1 14.50 usec  
 PLW1 10.00000000 W

===== CHANNEL f2 =====  
 SFO2 400.1316005 MHz  
 NUC2 1H  
 CPDPRG[2] waltz16  
 PCPD2 90.00 usec  
 PLW2 20.00000000 W  
 PLW12 0.24691001 W

F2 - Processing parameters  
 SI 131072  
 SF 376.4983660 MHz  
 WDW EM  
 SSB 0  
 LB 0.30 Hz  
 GB 0  
 PC 1.00

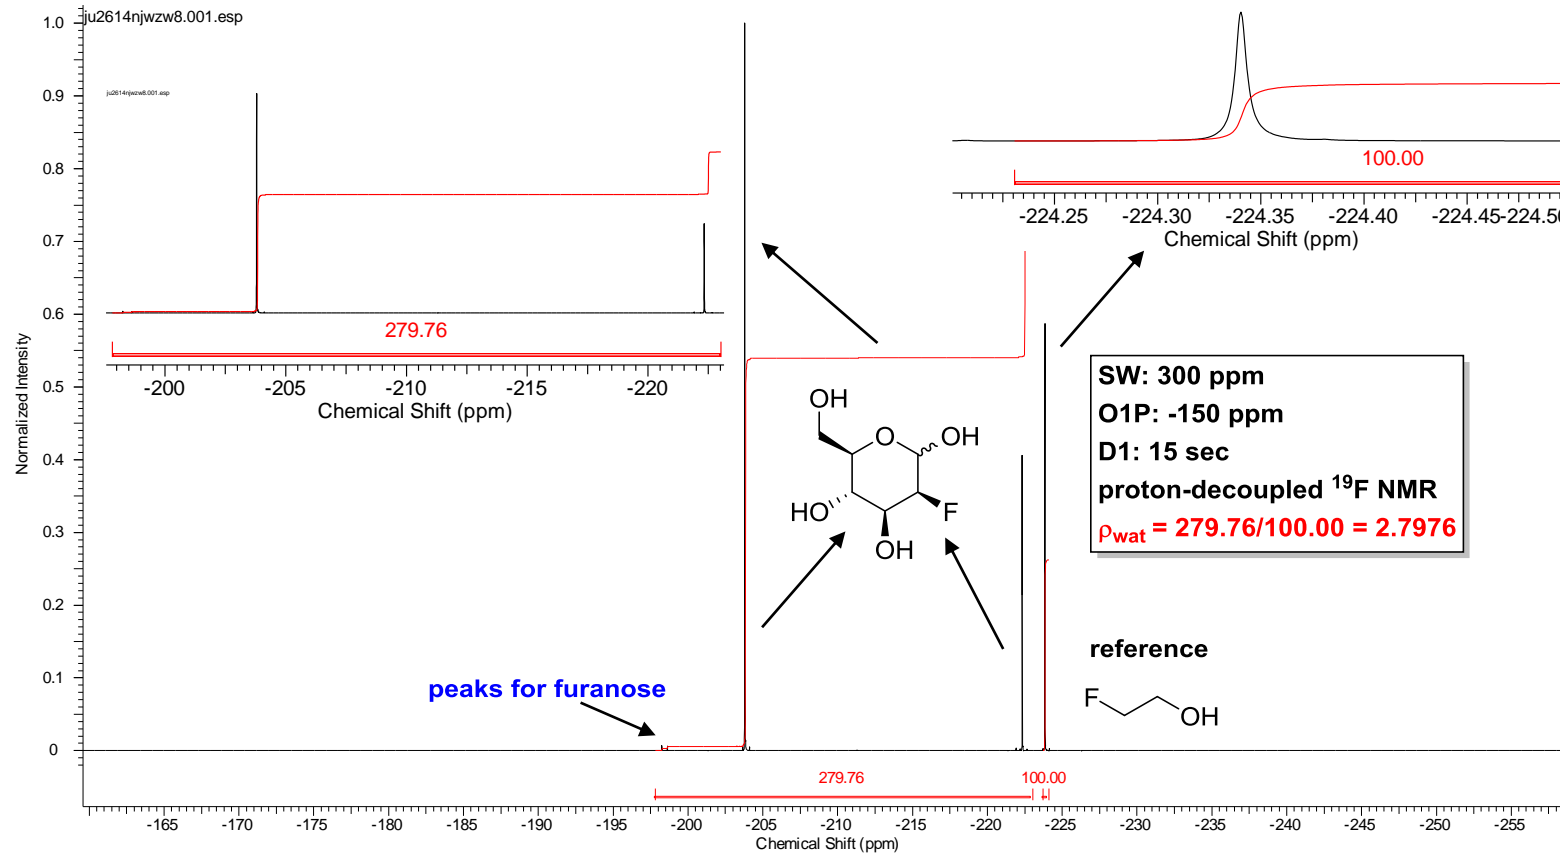

## 14.13. 2,3-Dideoxy-3-fluoro-D-glucopyranose (51), Entry 1, octanol sample

ZW7157-9 OCT

SW: 100 ppm  
 O1P: -100 ppm  
 D1: 50 sec  
 proton-decoupled  $^{19}\text{F}$  NMR  
 $\rho_{\text{oct}} = 7.55/100.00 = 0.0755$   
 (see next page for detailed  
 integration information after  
 data processing)

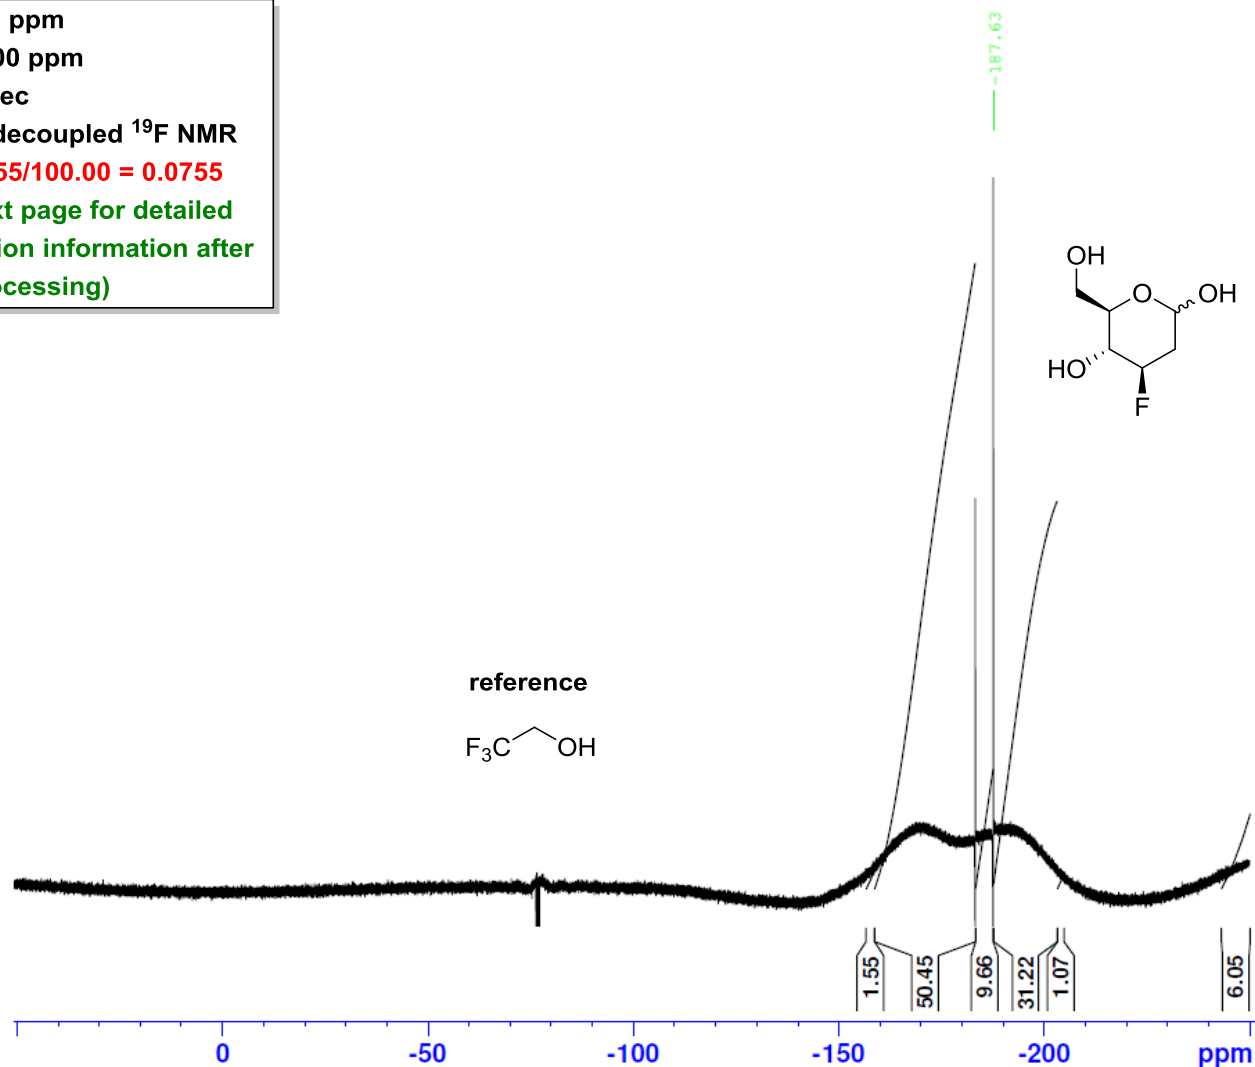

UNIVERSITY OF  
 Southampton

AVIIHD400 [3]

Current Data Parameters  
 NAME ju2214zw3  
 EXPNO 11  
 PROCNO 1

F2 - Acquisition Parameters  
 Date\_ 20140622  
 Time 13.03  
 INSTRUM spect  
 PROBHD 5 mm PABBO BB/  
 PULPROG zgfhigqn.2  
 TD 131072  
 SOLVENT Acetone  
 NS 64  
 DS 4  
 SWH 113636.367 Hz  
 FIDRES 0.866977 Hz  
 AQ 0.5767168 sec  
 RG 212.69  
 DW 4.400 usec  
 DE 6.50 usec  
 TE 298.0 K  
 D1 50.00000000 sec  
 D11 0.03000000 sec  
 D12 0.00002000 sec  
 TD0 1

===== CHANNEL f1 =====  
 SFO1 376.4607164 MHz  
 NUC1  $^{19}\text{F}$   
 P1 11.70 usec  
 PLW1 32.00000000 W

===== CHANNEL f2 =====  
 SFO2 400.1316005 MHz  
 NUC2  $^1\text{H}$   
 CPDPRG[2] waltz16  
 PCPD2 70.00 usec  
 PLW2 32.00000000 W  
 PLW12 0.31999999 W

F2 - Processing parameters  
 SI 65536  
 SF 376.4980709 MHz  
 WDW EM  
 SSB 0  
 LB 0.30 Hz  
 GB 0  
 PC 1.00

|                        |                                                                                                                                |                   |                 |                        |                      |                      |             |
|------------------------|--------------------------------------------------------------------------------------------------------------------------------|-------------------|-----------------|------------------------|----------------------|----------------------|-------------|
| Acquisition Time (sec) | 0.5767                                                                                                                         | Comment           | ZW7157-9 OCT    | Date                   | 22 Jun 2014 13:03:12 |                      |             |
| Date Stamp             | 22 Jun 2014 13:03:12                                                                                                           |                   |                 |                        |                      |                      |             |
| File Name              | \\soton.ac.uk\ude\personalfiles\users\zw3g10\mydesktop\logP project\Sugar logP NMR (ZW)\Lucas 3-fluoroglucose\ju2214zw3\11\fid |                   |                 |                        |                      |                      |             |
| Frequency (MHz)        | 376.46                                                                                                                         | Nucleus           | <sup>19</sup> F | Number of Transients   | 64                   | Origin               | spect       |
| Original Points Count  | 65536                                                                                                                          | Owner             | nmr             | Points Count           | 262144               | Pulse Sequence       | zgfhigqn.2  |
| Receiver Gain          | 212.69                                                                                                                         | SW(cyclical) (Hz) | 113636.36       | Solvent                | Acetone              | Spectrum Offset (Hz) | -37649.6211 |
| Spectrum Type          | STANDARD                                                                                                                       | Sweep Width (Hz)  | 113635.93       | Temperature (degree C) | 24.990               |                      |             |

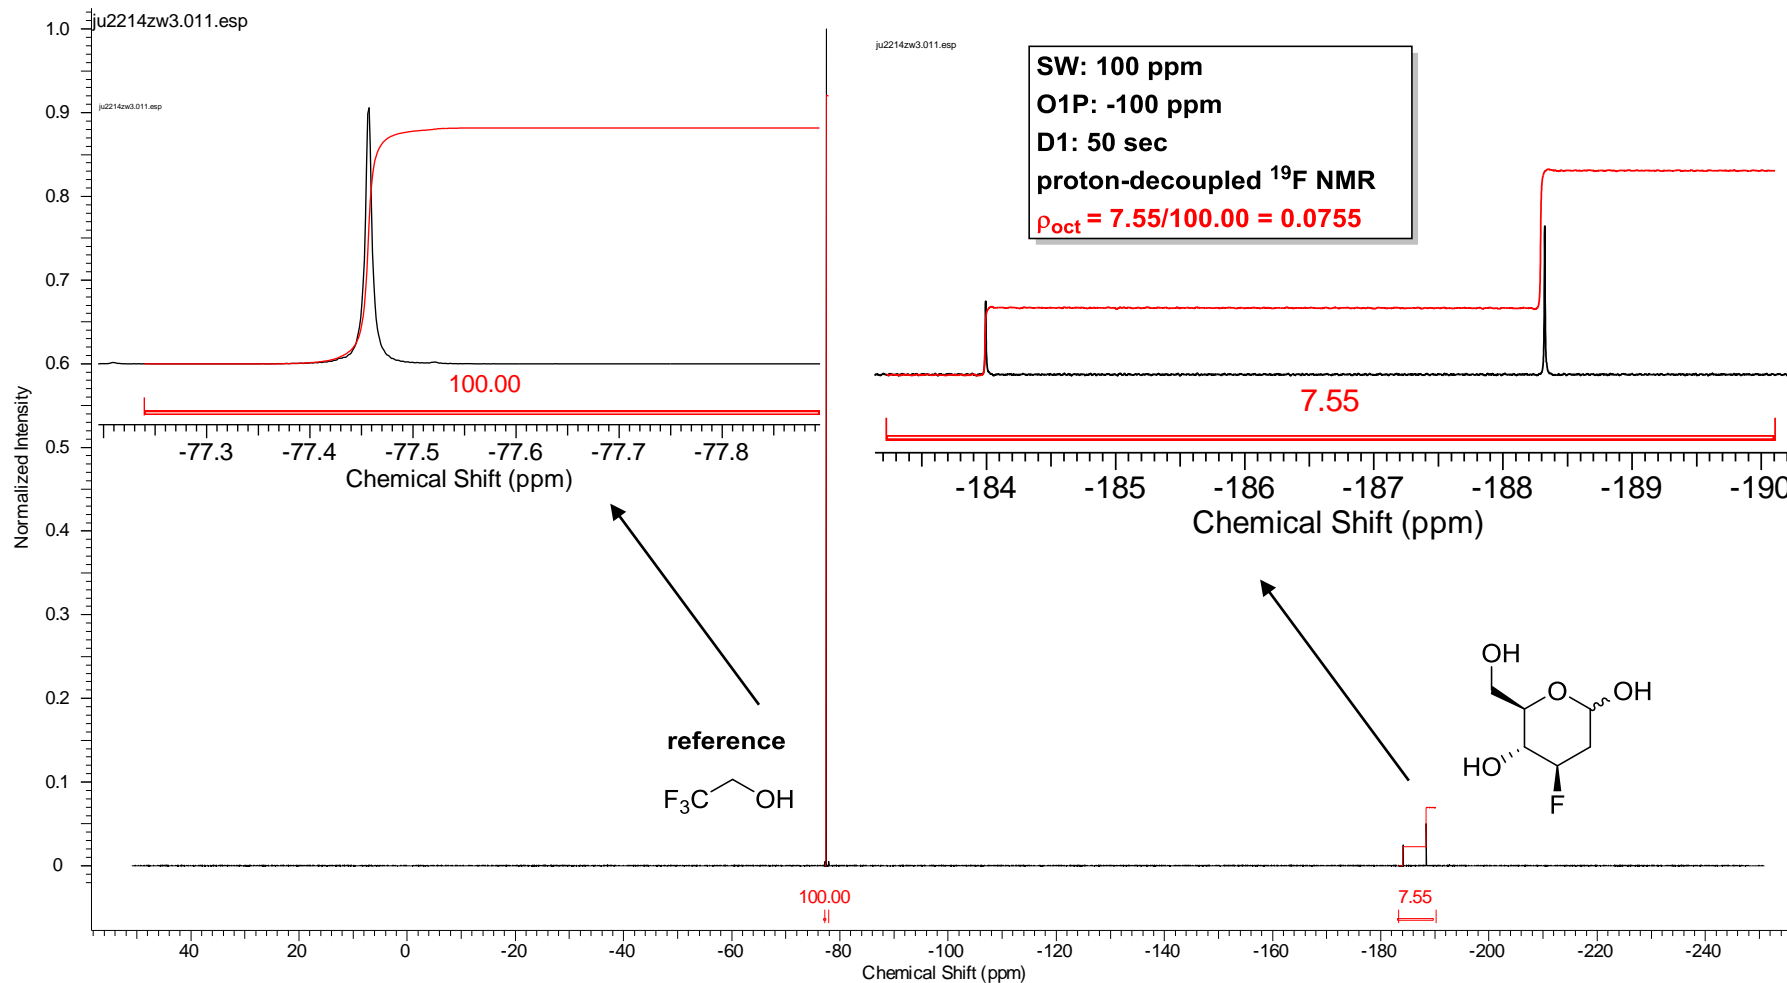

## 14.14. 2,3-Dideoxy-3-fluoro-D-glucopyranose (51), Entry 1, water sample

ZW7157-9 WAT

SW: 100 ppm  
 O1P: -100 ppm  
 D1: 50 sec  
 proton-decoupled  $^{19}\text{F}$  NMR  
 $\rho_{\text{wat}} = 484.45/100.00 = 4.8445$   
 (see next page for detailed  
 integration information after  
 data processing)

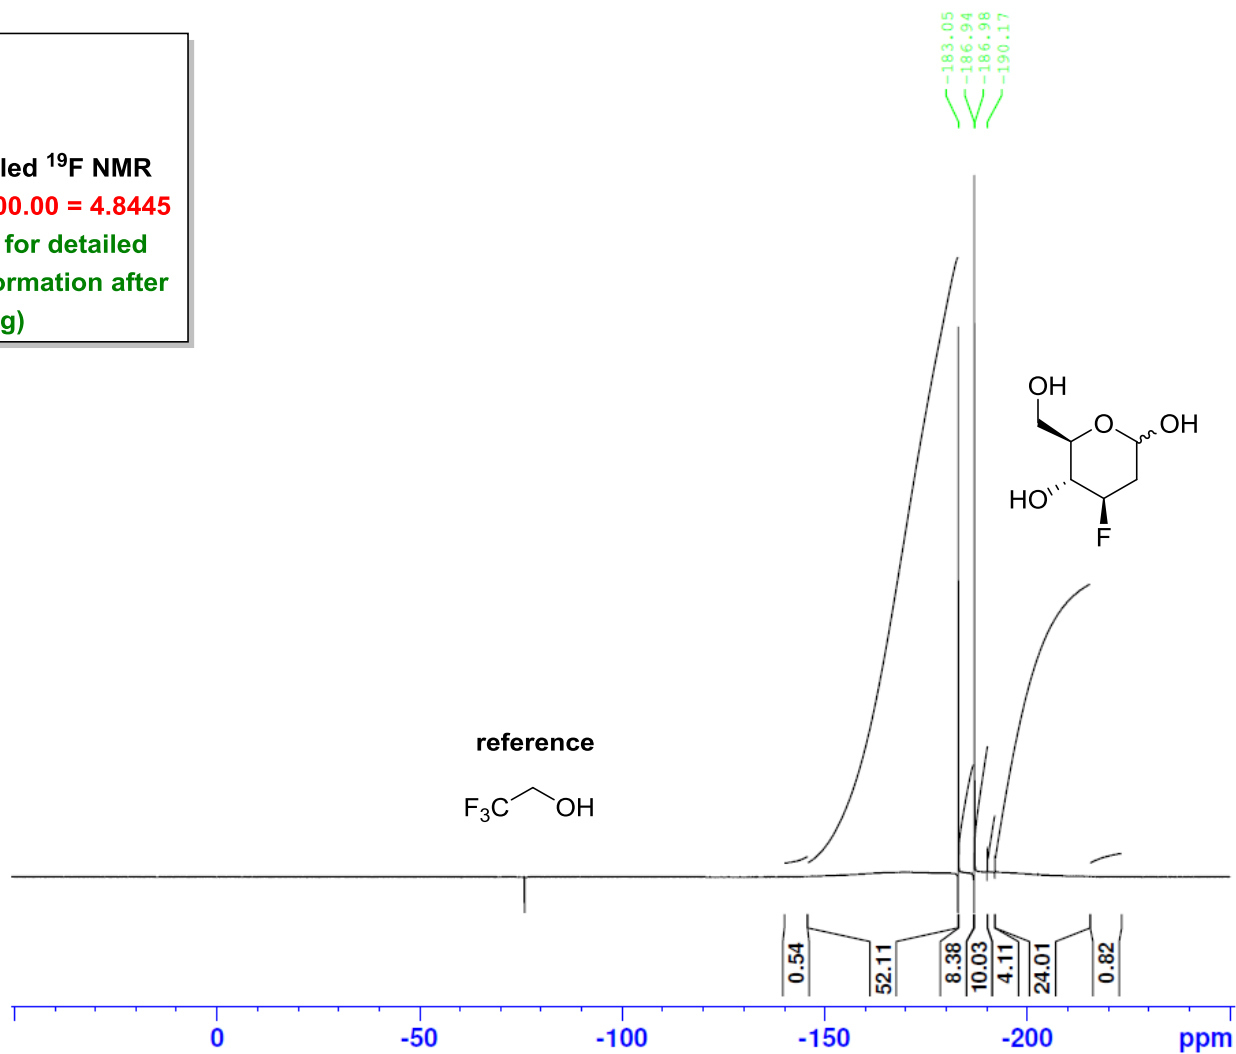

UNIVERSITY OF  
 Southampton

AVIIIHD400 [3]

Current Data Parameters  
 NAME ju2214zw4  
 EXPNO 11  
 PROCNO 1

F2 - Acquisition Parameters  
 Date\_ 20140622  
 Time 14.08  
 INSTRUM spect  
 PROBHD 5 mm PABBO BB/  
 PULPROG zgfhigqn.2  
 TD 131072  
 SOLVENT Acetone  
 NS 64  
 DS 4  
 SWH 113636.367 Hz  
 FIDRES 0.866977 Hz  
 AQ 0.5767168 sec  
 RG 212.69  
 DW 4.400 usec  
 DE 6.50 usec  
 TE 298.0 K  
 D1 50.00000000 sec  
 D11 0.03000000 sec  
 D12 0.00002000 sec  
 TD0 1

===== CHANNEL f1 =====  
 SFO1 376.4607164 MHz  
 NUC1 19F  
 P1 11.70 usec  
 PLW1 32.00000000 W

===== CHANNEL f2 =====  
 SFO2 400.1316005 MHz  
 NUC2 1H  
 CPDPRG[2] waltz16  
 PCPD2 70.00 usec  
 PLW2 32.00000000 W  
 PLW12 0.31999999 W

F2 - Processing parameters  
 SI 65536  
 SF 376.4980709 MHz  
 WDW EM  
 SSB 0  
 LB 0.30 Hz  
 GB 0  
 PC 1.00

|                        |                                                                                                                                 |                   |              |                        |                      |                      |             |
|------------------------|---------------------------------------------------------------------------------------------------------------------------------|-------------------|--------------|------------------------|----------------------|----------------------|-------------|
| Acquisition Time (sec) | 0.5767                                                                                                                          | Comment           | ZW7157-9 WAT | Date                   | 22 Jun 2014 14:09:20 |                      |             |
| Date Stamp             | 22 Jun 2014 14:09:20                                                                                                            |                   |              |                        |                      |                      |             |
| File Name              | \\soton.ac.uk\ludelpersonalfiles\users\zw3g10\mydesktop\logP project\Sugar logP NMR (ZW)\Lucas 3-fluoroglucose\ju2214zw4\11\fid |                   |              |                        |                      |                      |             |
| Frequency (MHz)        | 376.46                                                                                                                          | Nucleus           | 19F          | Number of Transients   | 64                   | Origin               | spect       |
| Original Points Count  | 65536                                                                                                                           | Owner             | nmr          | Points Count           | 262144               | Pulse Sequence       | zgfhigqn.2  |
| Receiver Gain          | 212.69                                                                                                                          | SW(cyclical) (Hz) | 113636.36    | Solvent                | Acetone              | Spectrum Offset (Hz) | -37649.6211 |
| Spectrum Type          | STANDARD                                                                                                                        | Sweep Width (Hz)  | 113635.93    | Temperature (degree C) | 25.003               |                      |             |

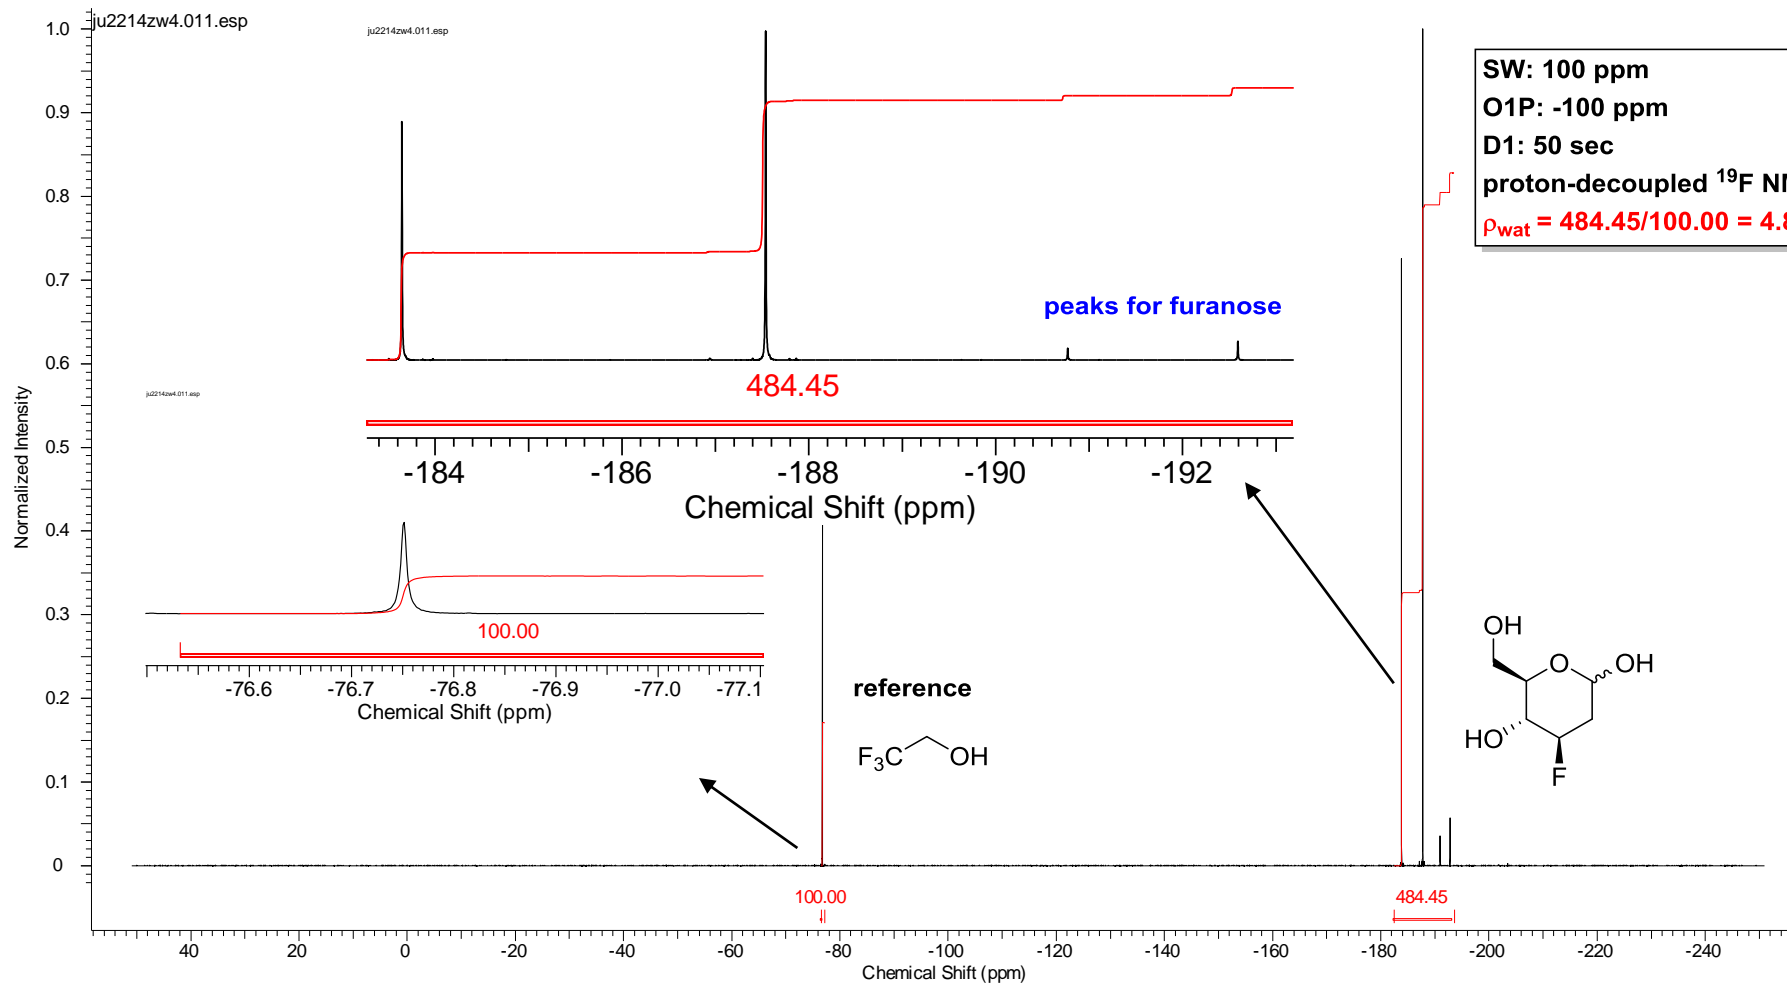



## 14.15. 2,3-Dideoxy-2,3-difluoro-D-glucopyranose (52), Entry 1, octanol sample

ZW7157-16 OCT

AVIIHD400 [3]

SW: 300 ppm  
 O1P: -100 ppm  
 D1: 50 sec  
 proton-decoupled <sup>19</sup>F NMR  
 $\rho_{\text{Oct}} = 81.13/100.00 = 0.8113$   
 (see next page for detailed  
 integration information after  
 data processing)

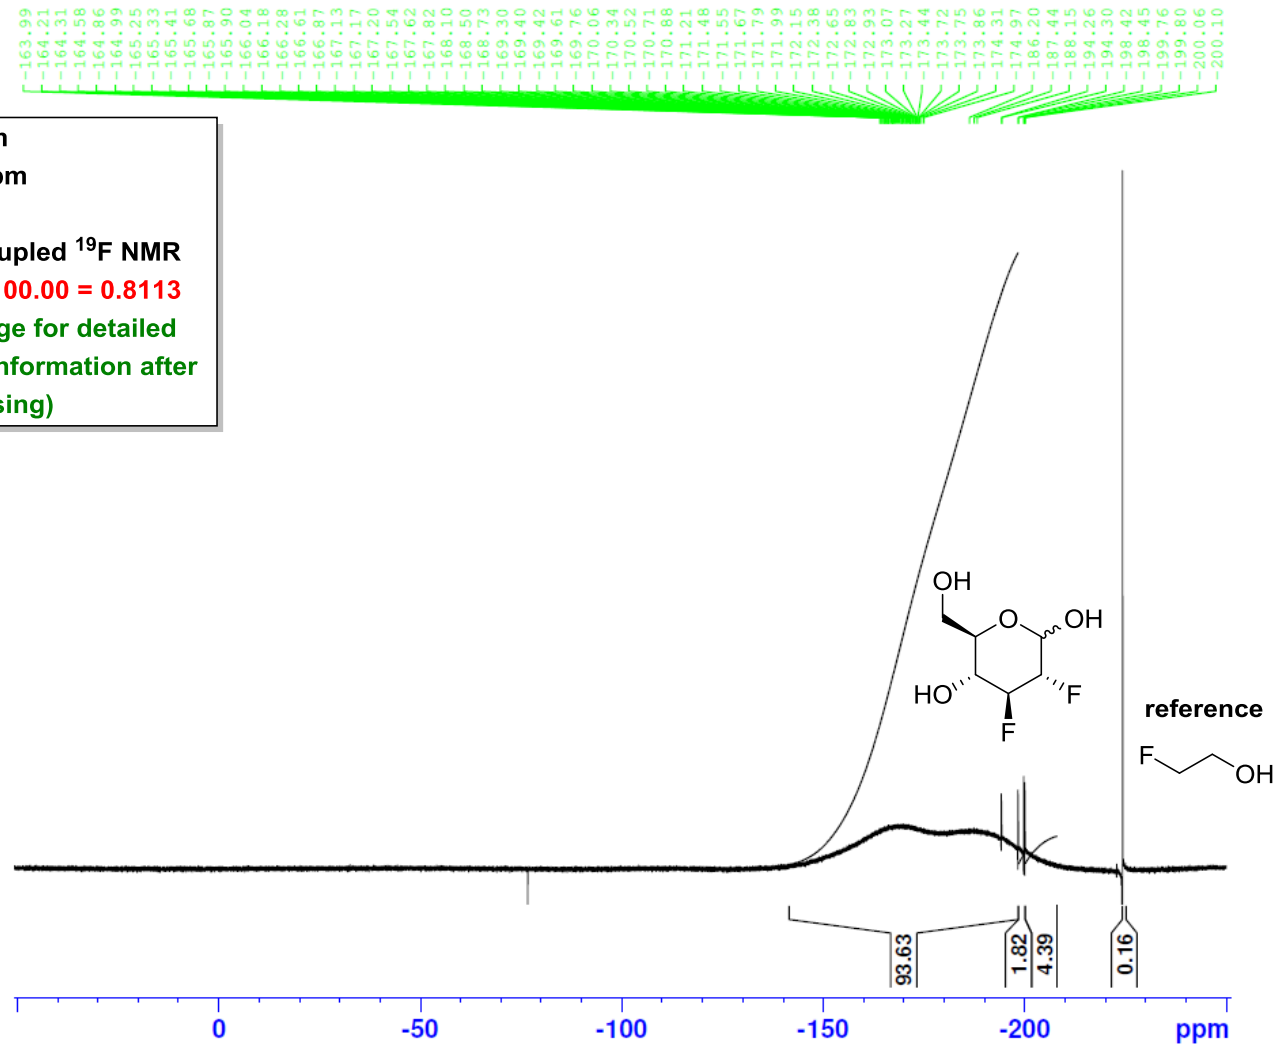

```

Current Data Parameters
NAME          jy0814zw4
EXPNO         12
PROCNO        1

F2 - Acquisition Parameters
Date_         20140708
Time          23.38
INSTRUM       spect
PROBHD        5 mm PABBO BB/
PULPROG       zgfhigqn.2
TD            131072
SOLVENT       Acetone
NS            64
DS            4
SWH           113636.367 Hz
FIDRES        0.866977 Hz
AQ            0.5767168 sec
RG            212.69
DW            4.400 usec
DE            6.50 usec
TE            298.0 K
D1            50.00000000 sec
D11           0.03000000 sec
D12           0.00002000 sec
TD0           1

===== CHANNEL f1 =====
SFO1          376.4607164 MHz
NUC1           19F
P1            11.70 usec
PLW1          32.00000000 W

===== CHANNEL f2 =====
SFO2          400.1316005 MHz
NUC2           1H
CPDPRG[2]     waltz16
PCPD2         70.00 usec
PLW2          32.00000000 W
PLW12         0.31999999 W

F2 - Processing parameters
SI            65536
SF            376.4980709 MHz
WDW           EM
SSB           0
LB            0.30 Hz
GB            0
PC            1.00
  
```

ZW7157-16 OCT

|                        |                                                                                                                   |                   |                 |                        |                      |                      |             |
|------------------------|-------------------------------------------------------------------------------------------------------------------|-------------------|-----------------|------------------------|----------------------|----------------------|-------------|
| Acquisition Time (sec) | 0.5767                                                                                                            | Comment           | ZW7157-16 OCT   | Date                   | 08 Jul 2014 23:38:56 |                      |             |
| Date Stamp             | 08 Jul 2014 23:38:56                                                                                              |                   |                 |                        |                      |                      |             |
| File Name              | C:\Documents and Settings\Samuel Golten\Desktop\Sugar logP NMR\ZW7157-16 Compound Code LQ7219-68\jy0814zw4\12\fid |                   |                 |                        |                      |                      |             |
| Frequency (MHz)        | 376.50                                                                                                            | Nucleus           | <sup>19</sup> F | Number of Transients   | 64                   | Origin               | spect       |
| Original Points Count  | 65536                                                                                                             | Owner             | nmr             | Points Count           | 262144               | Pulse Sequence       | zgfhigqn.2  |
| Receiver Gain          | 212.69                                                                                                            | SW(cyclical) (Hz) | 113636.37       | Solvent                | Acetone              | Spectrum Offset (Hz) | -37354.4844 |
| Spectrum Type          | STANDARD                                                                                                          | Sweep Width (Hz)  | 113635.94       | Temperature (degree C) | 24.996               |                      |             |

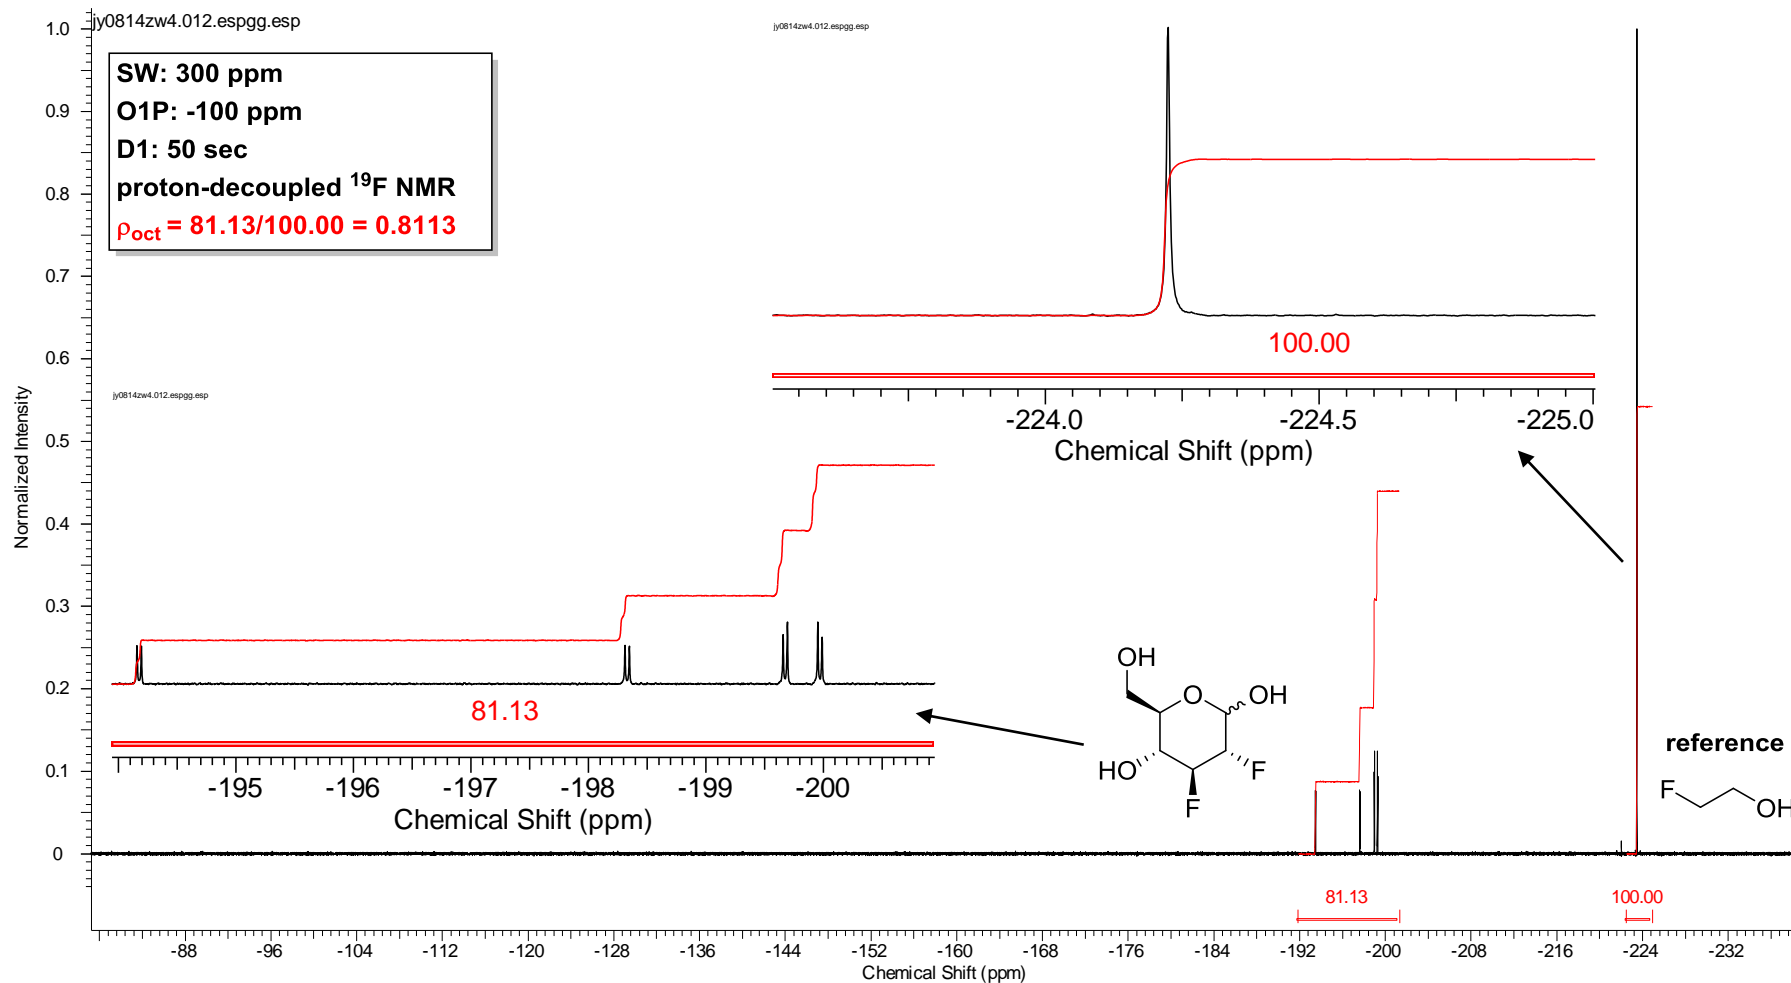

## 14.16. 2,3-Dideoxy-2,3-difluoro-D-glucopyranose (52), Entry 1, water sample

ZW7157-16 WAT

SW: 300 ppm  
 O1P: -100 ppm  
 D1: 50 sec  
 proton-decoupled  $^{19}\text{F}$  NMR  
 $P_{\text{wat}} = 187.59/100.00 = 1.8759$   
 (see next page for detailed  
 integration information after  
 data processing)

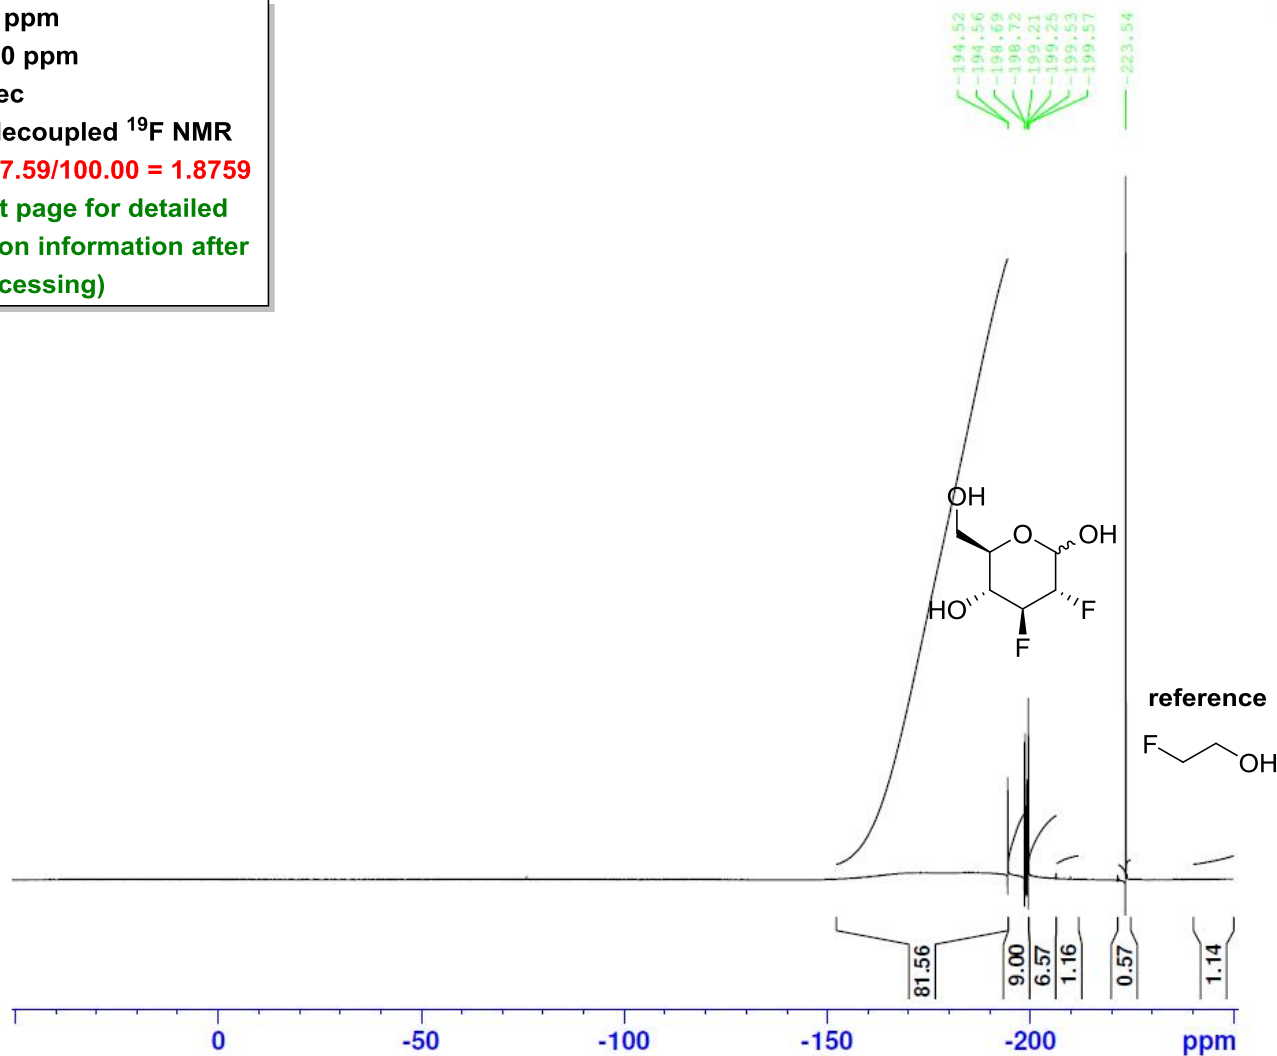

UNIVERSITY OF  
 Southampton

AVIIIHD400 [3]

Current Data Parameters  
 NAME jy0814zw5  
 EXPNO 12  
 PROCNO 1

F2 - Acquisition Parameters  
 Date\_ 20140709  
 Time 1.01  
 INSTRUM spect  
 PROBHD 5 mm PABBO BB/  
 PULPROG zgfhigqn.2  
 TD 131072  
 SOLVENT Acetone  
 NS 64  
 DS 4  
 SWH 113636.367 Hz  
 FIDRES 0.866977 Hz  
 AQ 0.5767168 sec  
 RG 212.69  
 DW 4.400 usec  
 DE 6.50 usec  
 TE 298.0 K  
 D1 50.00000000 sec  
 D11 0.03000000 sec  
 D12 0.00002000 sec  
 TD0 1

===== CHANNEL f1 =====  
 SFO1 376.4607164 MHz  
 NUC1  $^{19}\text{F}$   
 P1 11.70 usec  
 PLW1 32.00000000 W

===== CHANNEL f2 =====  
 SFO2 400.1316005 MHz  
 NUC2  $^1\text{H}$   
 CPDPRG[2] waltz16  
 PCPD2 70.00 usec  
 PLW2 32.00000000 W  
 PLW12 0.31999999 W

F2 - Processing parameters  
 SI 65536  
 SF 376.4980709 MHz  
 WDW EM  
 SSB 0  
 LB 0.30 Hz  
 GB 0  
 PC 1.00

ZW7157-16 WAT

|                        |                                                                                                                   |                   |                 |                        |                      |                      |             |
|------------------------|-------------------------------------------------------------------------------------------------------------------|-------------------|-----------------|------------------------|----------------------|----------------------|-------------|
| Acquisition Time (sec) | 0.5767                                                                                                            | Comment           | ZW7157-16 WAT   | Date                   | 09 Jul 2014 01:02:08 |                      |             |
| Date Stamp             | 09 Jul 2014 01:02:08                                                                                              |                   |                 |                        |                      |                      |             |
| File Name              | C:\Documents and Settings\Samuel Golten\Desktop\Sugar logP NMR\ZW7157-16 Compound Code LQ7219-68\jy0814zw5\12\fid |                   |                 |                        |                      |                      |             |
| Frequency (MHz)        | 376.50                                                                                                            | Nucleus           | <sup>19</sup> F | Number of Transients   | 64                   | Origin               | spect       |
| Original Points Count  | 65536                                                                                                             | Owner             | nmr             | Points Count           | 262144               | Pulse Sequence       | zgfhighgn.2 |
| Receiver Gain          | 212.69                                                                                                            | SW(cyclical) (Hz) | 113636.37       | Solvent                | Acetone              | Spectrum Offset (Hz) | -37354.4844 |
| Spectrum Type          | STANDARD                                                                                                          | Sweep Width (Hz)  | 113635.94       | Temperature (degree C) | 25.003               |                      |             |

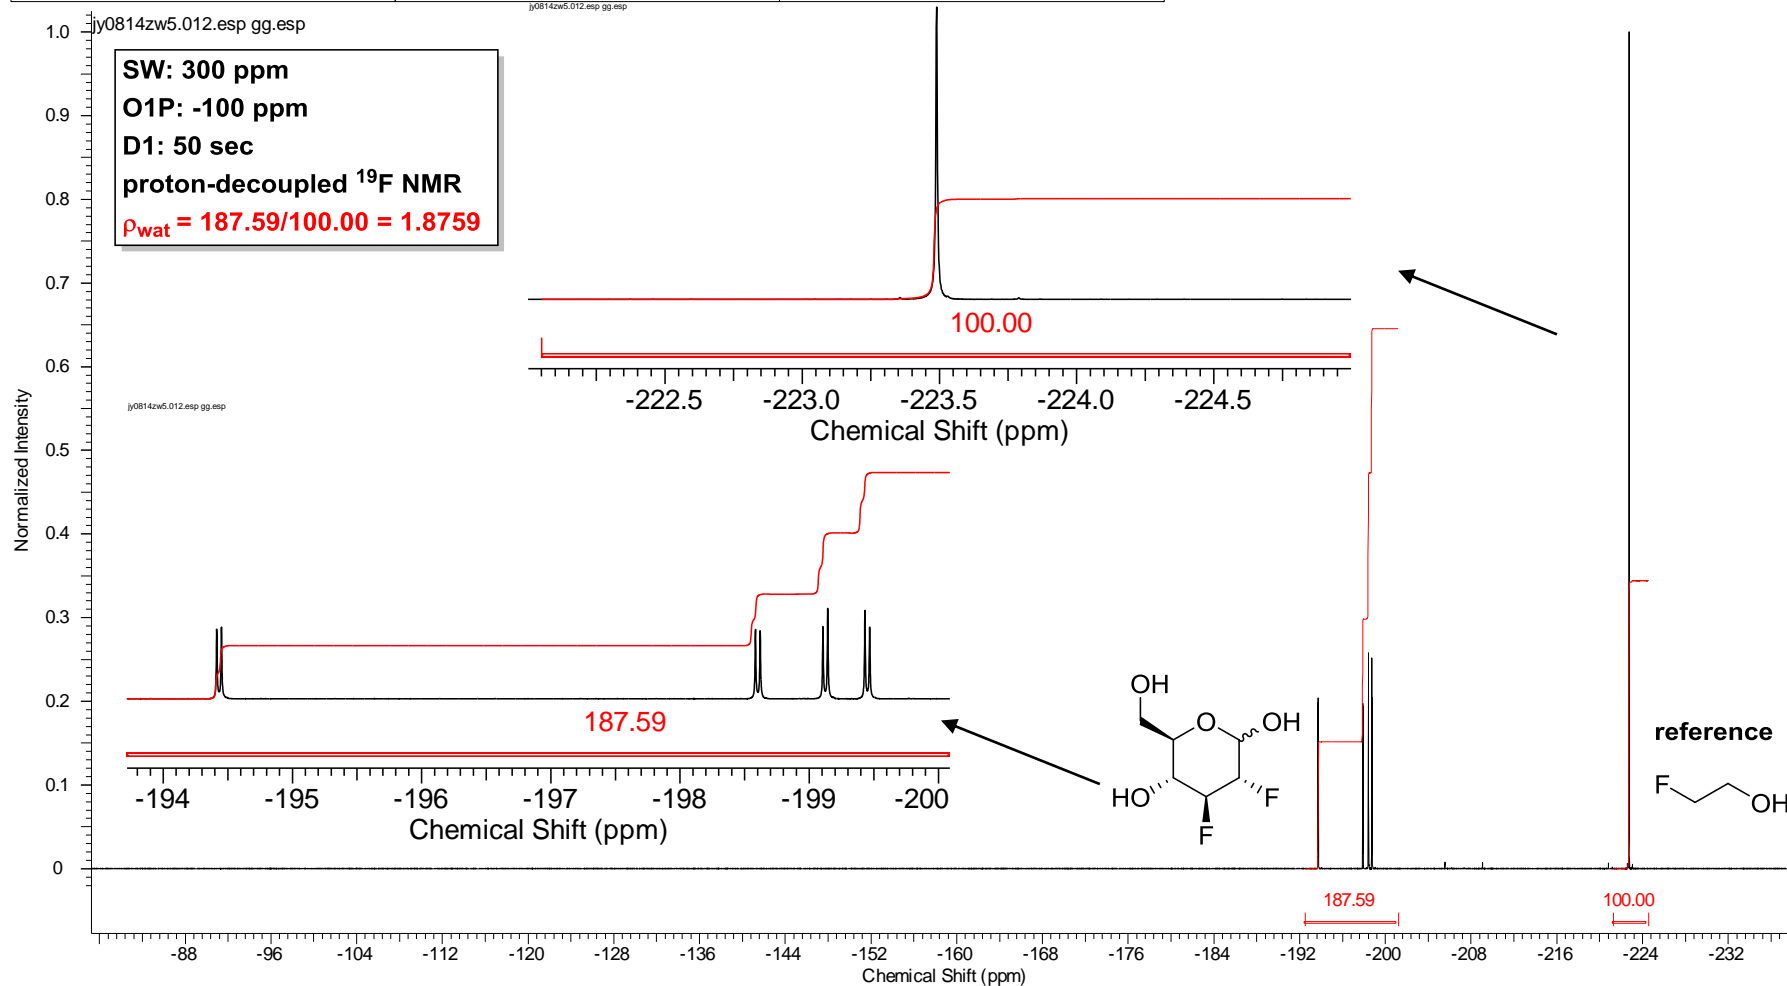

## 14.17. 2,3-Dideoxy-2,2,3,3-tetrafluoro-D-threo-hexopyranose (53), Entry 1, octanol sample

ZW7157-96-1 OCT

SW: 300 ppm  
 O1P: -101.768 ppm  
 D1: 30 sec  
 proton-decoupled  $^{19}\text{F}$  NMR  
 $\rho_{\text{oct}} = 12.32/100.00 = 0.1232$   
 (see next page for detailed  
 integration information  
 after data processing)

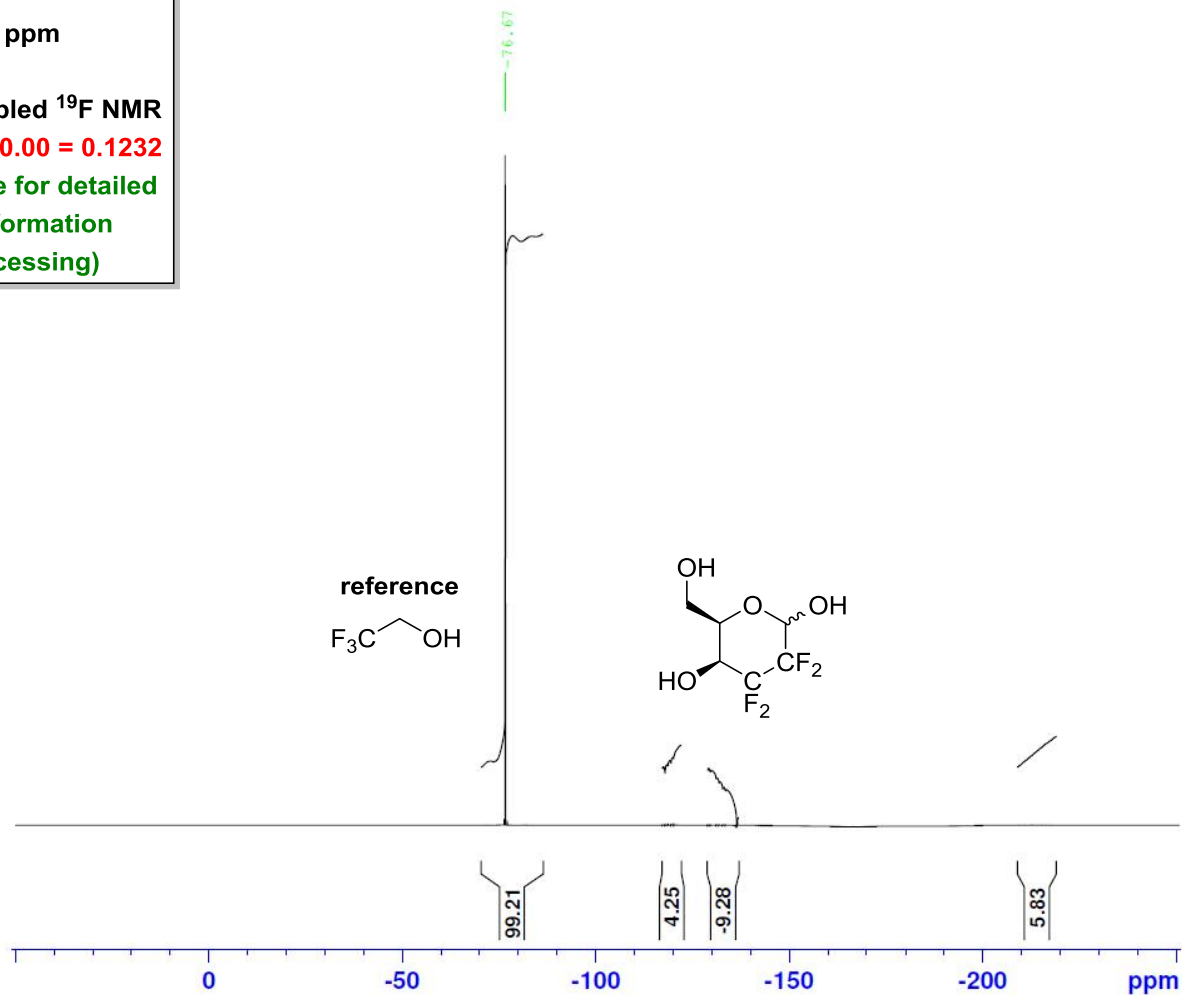

UNIVERSITY OF  
 Southampton

AVIIIHD400 [3]

Current Data Parameters  
 NAME my0915zw11  
 EXPNO 10  
 PROCNO 1

F2 - Acquisition Parameters  
 Date\_ 20150509  
 Time 20.55  
 INSTRUM spect  
 PROBHD 5 mm PABBO BB/  
 PULPROG zgfhigqn.2  
 TD 131072  
 SOLVENT Acetone  
 NS 64  
 DS 4  
 SWH 113636.367 Hz  
 FIDRES 0.866977 Hz  
 AQ 0.5767168 sec  
 RG 212.69  
 DW 4.400 usec  
 DE 6.50 usec  
 TE 299.2 K  
 D1 30.00000000 sec  
 D11 0.03000000 sec  
 D12 0.00002000 sec  
 TD0 1

===== CHANNEL f1 =====  
 SFO1 376.4600506 MHz  
 NUC1  $^{19}\text{F}$   
 P1 11.70 usec  
 PLW1 32.00000000 W

===== CHANNEL f2 =====  
 SFO2 400.1316005 MHz  
 NUC2  $^1\text{H}$   
 CPDPRG[2] waltz16  
 PCPD2 70.00 usec  
 PLW2 32.00000000 W  
 PLW12 0.31999999 W

F2 - Processing parameters  
 SI 65536  
 SF 376.4980709 MHz  
 WDW EM  
 SSB 0  
 LB 0.30 Hz  
 GB 0  
 PC 1.00

ZW7157-96-1 OCT

|                        |                                                                                                      |                        |                 |                      |                      |                       |          |
|------------------------|------------------------------------------------------------------------------------------------------|------------------------|-----------------|----------------------|----------------------|-----------------------|----------|
| Acquisition Time (sec) | 0.5767                                                                                               | Comment                | ZW7157-96-1 OCT | Date                 | 09 May 2015 20:54:40 |                       |          |
| Date Stamp             | 09 May 2015 20:54:40                                                                                 |                        |                 |                      |                      |                       |          |
| File Name              | \\soton.ac.uk\lud\personalfiles\users\zw3g10\mydesktop\Meine Arbeit 2015\zw7157-96\my0915zw11\10\fid |                        |                 | Frequency (MHz)      | 376.46               |                       |          |
| Nucleus                | <sup>19</sup> F                                                                                      | Number of Transients   | 64              | Origin               | spect                | Original Points Count | 65536    |
| Owner                  | nmr                                                                                                  | Points Count           | 262144          | Pulse Sequence       | zgfhggn.2            | Receiver Gain         | 212.69   |
| SW(cyclical) (Hz)      | 113636.37                                                                                            | Solvent                | Acetone         | Spectrum Offset (Hz) | -38315.4492          | Spectrum Type         | STANDARD |
| Sweep Width (Hz)       | 113635.94                                                                                            | Temperature (degree C) | 26.234          |                      |                      |                       |          |

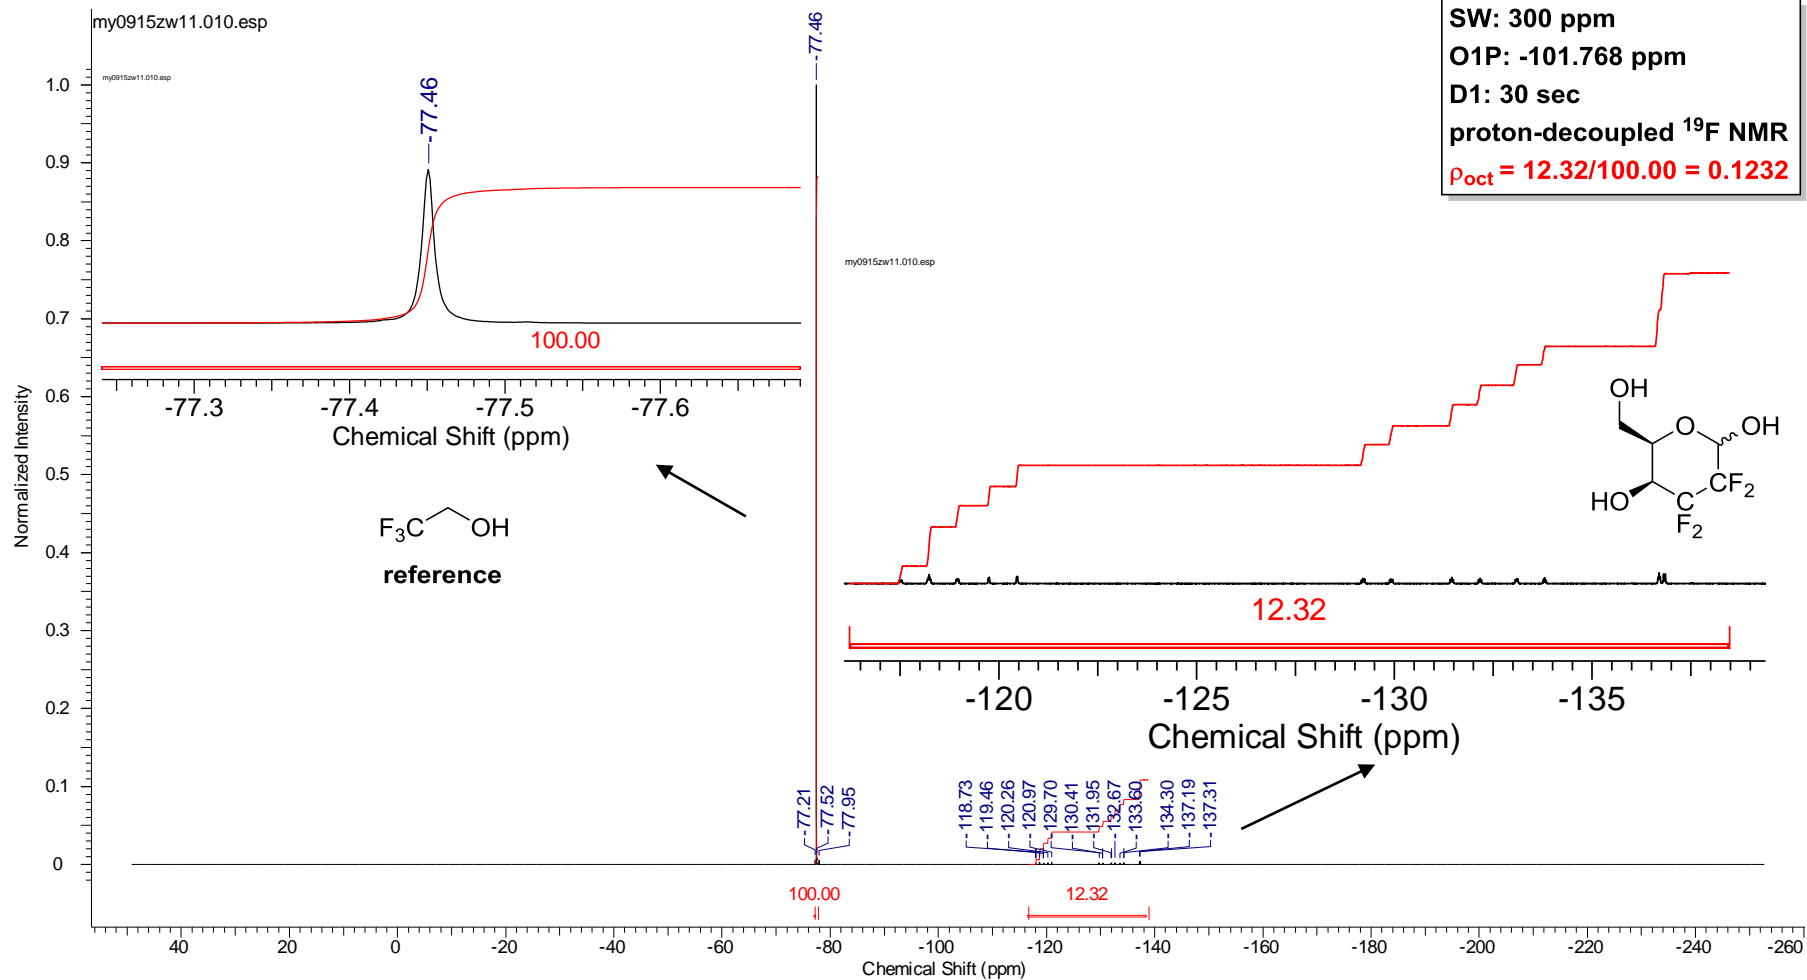

## 14.18. 2,3-Dideoxy-2,2,3,3-tetrafluoro-D-threo-hexopyranose (53), Entry 1, water sample

ZW7157-96-1 WAT

SW: 300 ppm  
 O1P: -101.533 ppm  
 D1: 60 sec  
 proton-decoupled  $^{19}\text{F}$  NMR  
 $P_{\text{wat}} = 105.71/100.00 = 1.0571$   
 (see next page for detailed  
 integration information after  
 data processing)

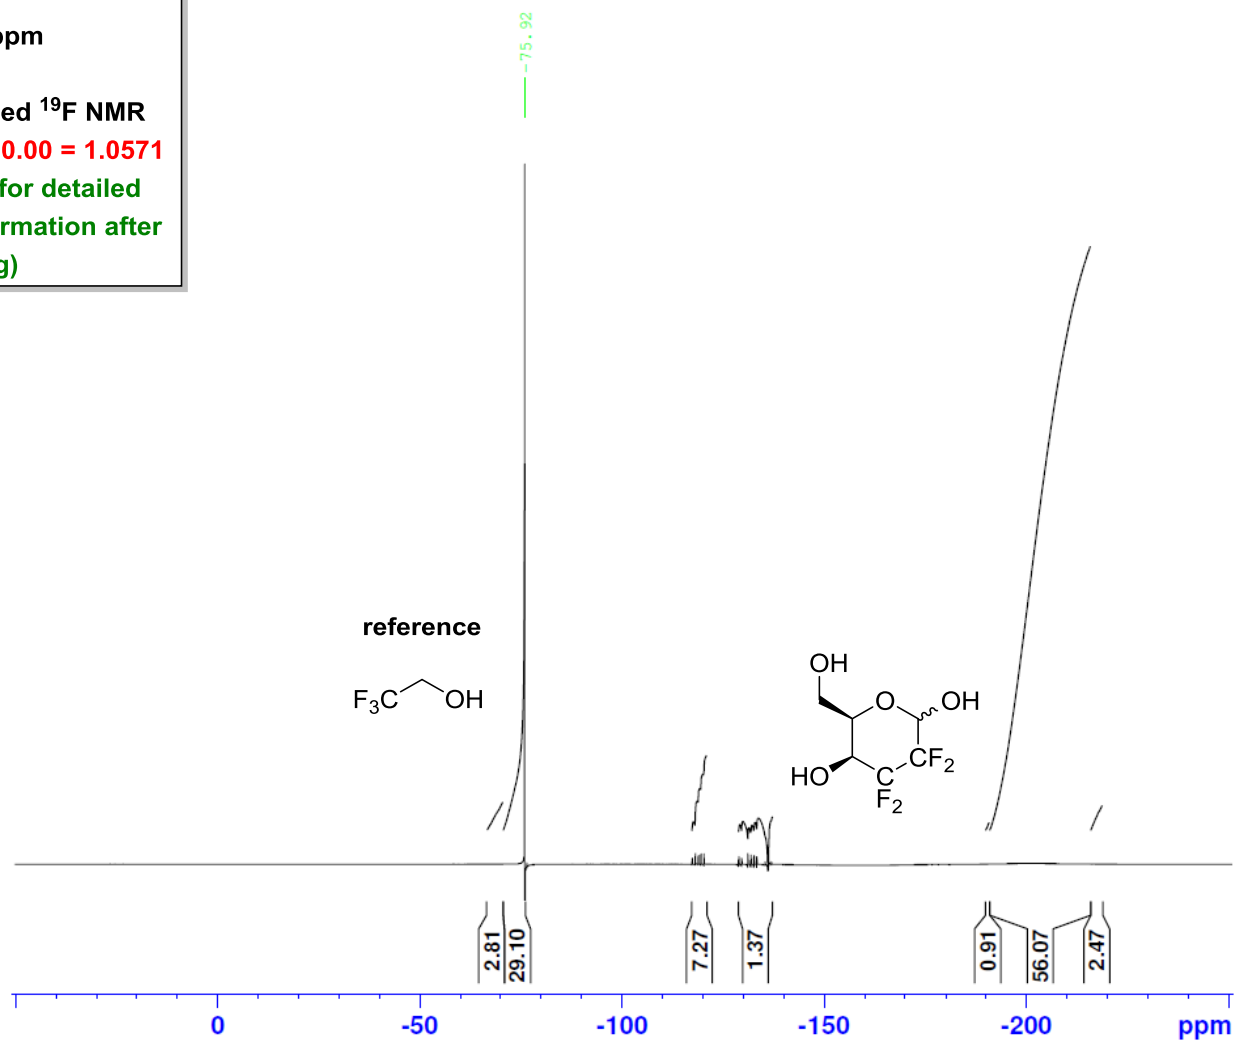

UNIVERSITY OF  
 Southampton

AVIIHD400 [3]

Current Data Parameters  
 NAME my0915zw12  
 EXPNO 10  
 PROCNO 1

F2 - Acquisition Parameters  
 Date\_ 20150509  
 Time 22.10  
 INSTRUM spect  
 PROBHD 5 mm PABBO BB/  
 PULPROG zgfhigqn.2  
 TD 131072  
 SOLVENT Acetone  
 NS 64  
 DS 4  
 SWH 113636.367 Hz  
 FIDRES 0.866977 Hz  
 AQ 0.5767168 sec  
 RG 212.69  
 DW 4.400 usec  
 DE 6.50 usec  
 TE 299.1 K  
 D1 60.00000000 sec  
 D11 0.03000000 sec  
 D12 0.00002000 sec  
 TD0 1

===== CHANNEL f1 =====  
 SFO1 376.4601390 MHz  
 NUC1 19F  
 P1 11.70 usec  
 PLW1 32.00000000 W

===== CHANNEL f2 =====  
 SFO2 400.1316005 MHz  
 NUC2 1H  
 CPDPRG[2] waltz16  
 PCPD2 70.00 usec  
 PLW2 32.00000000 W  
 PLW12 0.31999999 W

F2 - Processing parameters  
 SI 65536  
 SF 376.4980709 MHz  
 WDW EM  
 SSB 0  
 LB 0.30 Hz  
 GB 0  
 PC 1.00

ZW7157-96-1 WAT

|                        |                                                                                                       |                        |                 |                      |                      |                       |          |
|------------------------|-------------------------------------------------------------------------------------------------------|------------------------|-----------------|----------------------|----------------------|-----------------------|----------|
| Acquisition Time (sec) | 0.5767                                                                                                | Comment                | ZW7157-96-1 WAT | Date                 | 09 May 2015 22:11:28 |                       |          |
| Date Stamp             | 09 May 2015 22:11:28                                                                                  |                        |                 |                      |                      |                       |          |
| File Name              | \\soton.ac.uk\ludelpersonalfiles\users\zw3g10\mydesktop\Meine Arbeit 2015\zw7157-96\my0915zw12\10\fid |                        |                 | Frequency (MHz)      | 376.46               |                       |          |
| Nucleus                | <sup>19</sup> F                                                                                       | Number of Transients   | 64              | Origin               | spect                | Original Points Count | 65536    |
| Owner                  | nmr                                                                                                   | Points Count           | 262144          | Pulse Sequence       | zgfhigqn.2           | Receiver Gain         | 212.69   |
| SW(cyclical) (Hz)      | 113636.37                                                                                             | Solvent                | Acetone         | Spectrum Offset (Hz) | -38226.9727          | Spectrum Type         | STANDARD |
| Sweep Width (Hz)       | 113635.94                                                                                             | Temperature (degree C) | 26.128          |                      |                      |                       |          |

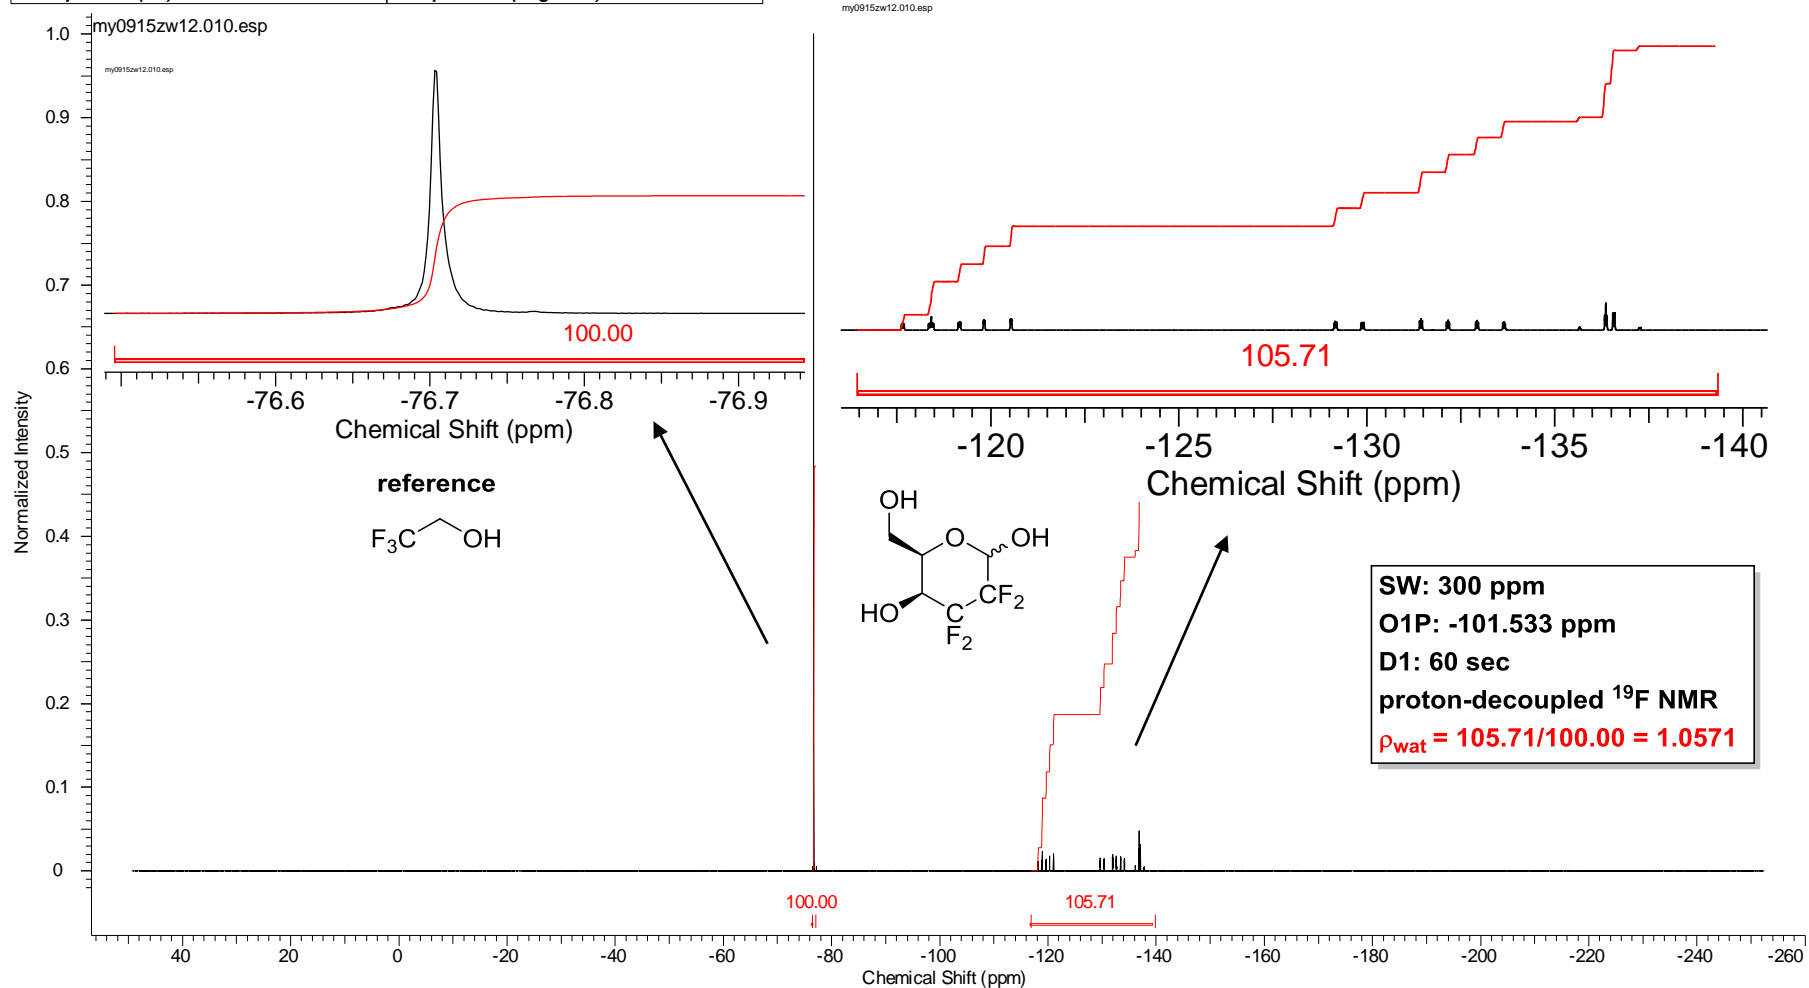



## 14.19. 2,3-Dideoxy-2,2,3,3-tetrafluoro-D-erythro-hexopyranose (54), Entry 1, octanol sample

ZW7157-11 OCT

SW: 300 ppm  
 O1P: -100 ppm  
 D1: 50 sec  
 proton-decoupled  $^{19}\text{F}$  NMR  
 $\rho_{\text{oct}} = 199.75/100.00 = 1.9975$   
 (see next page for detailed  
 integration information after  
 data processing)

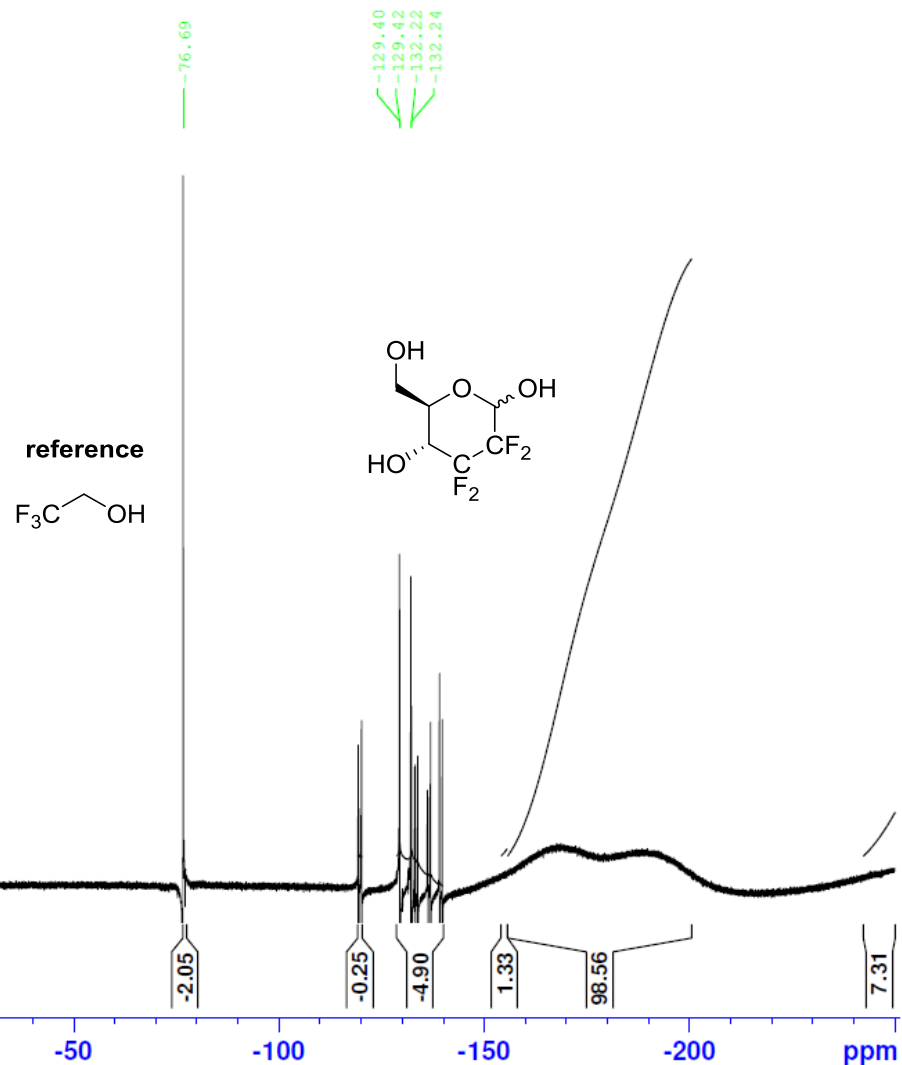

UNIVERSITY OF  
 Southampton

AVIIIHD400 [3]

Current Data Parameters  
 NAME ju2314zw1  
 EXPNO 11  
 PROCNO 1

F2 - Acquisition Parameters  
 Date\_ 20140623  
 Time 10.34  
 INSTRUM spect  
 PROBHD 5 mm PABBO BB/  
 PULPROG zgfhigqn.2  
 TD 131072  
 SOLVENT Acetone  
 NS 64  
 DS 4  
 SWH 113636.367 Hz  
 FIDRES 0.866977 Hz  
 AQ 0.5767168 sec  
 RG 212.69  
 DW 4.400 usec  
 DE 6.50 usec  
 TE 298.0 K  
 D1 50.00000000 sec  
 D11 0.03000000 sec  
 D12 0.00002000 sec  
 TD0 1

===== CHANNEL f1 =====  
 SFO1 376.4607164 MHz  
 NUC1 19F  
 P1 11.70 usec  
 PLW1 32.00000000 W

===== CHANNEL f2 =====  
 SFO2 400.1316005 MHz  
 NUC2 1H  
 CPDPRG[2] waltz16  
 PCPD2 70.00 usec  
 PLW2 32.00000000 W  
 PLW12 0.319999999 W

F2 - Processing parameters  
 SI 65536  
 SF 376.4980709 MHz  
 WDW EM  
 SSB 0  
 LB 0.30 Hz  
 GB 0  
 PC 1.00

|                        |                      |                   |                                                                                    |                        |                      |                      |             |
|------------------------|----------------------|-------------------|------------------------------------------------------------------------------------|------------------------|----------------------|----------------------|-------------|
| Acquisition Time (sec) | 0.5767               | Comment           | ZW7157-11 OCT                                                                      | Date                   | 23 Jun 2014 10:33:52 |                      |             |
| Date Stamp             | 23 Jun 2014 10:33:52 | File Name         | C:\Documents and Settings\Samuel Golten\Desktop\log NMR\SG sugar\ju2314zw1\111\fid |                        |                      |                      |             |
| Frequency (MHz)        | 376.50               | Nucleus           | 19F                                                                                | Number of Transients   | 64                   | Origin               | spect       |
| Original Points Count  | 65536                | Owner             | nmr                                                                                | Points Count           | 262144               | Pulse Sequence       | zgfhigqn.2  |
| Receiver Gain          | 212.69               | SW(cyclical) (Hz) | 113636.37                                                                          | Solvent                | Acetone              | Spectrum Offset (Hz) | -37354.4844 |
| Spectrum Type          | STANDARD             | Sweep Width (Hz)  | 113635.94                                                                          | Temperature (degree C) | 24.995               |                      |             |

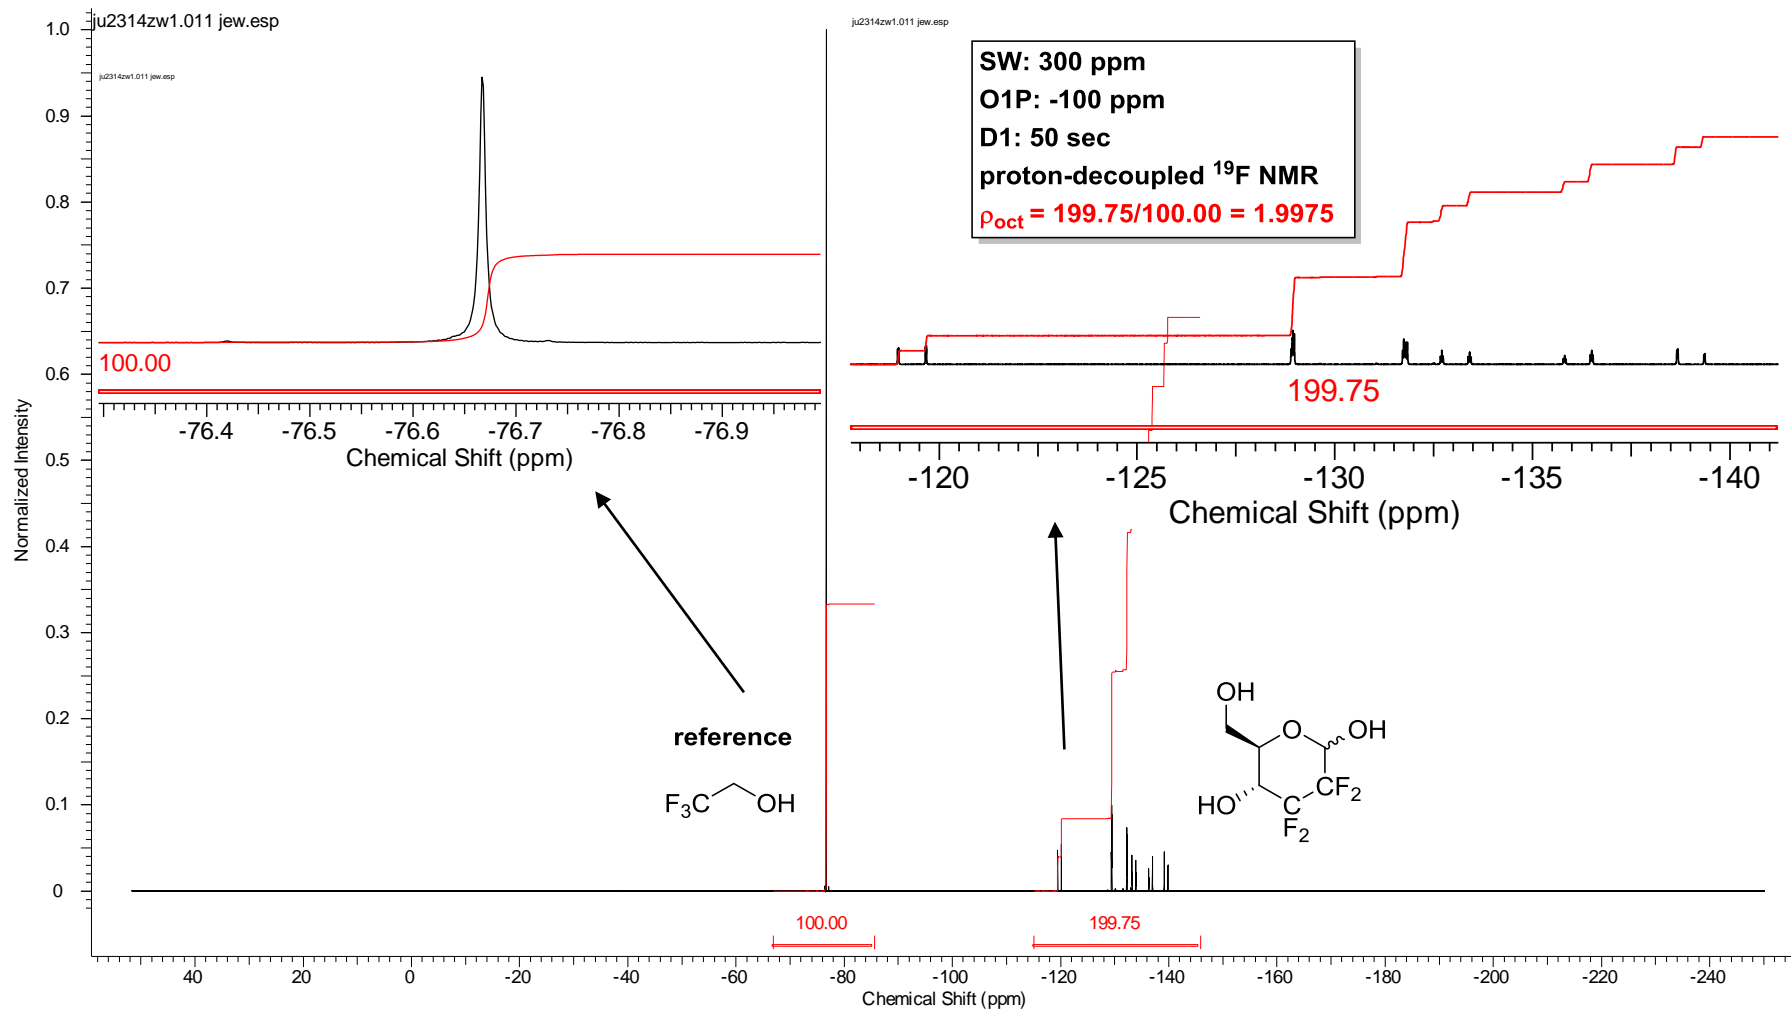

## 14.20. 2,3-Dideoxy-2,2,3,3-tetrafluoro-D-erythro-hexopyranose (54), Entry 1, water sample

ZW7157-11 WAT

SW: 300 ppm  
 O1P: -100 ppm  
 D1: 50 sec  
 proton-decoupled  $^{19}\text{F}$  NMR  
 $\rho_{\text{wat}} = 946.38/100.00 = 9.4638$   
 (see next page for detailed  
 integration information after  
 data processing)

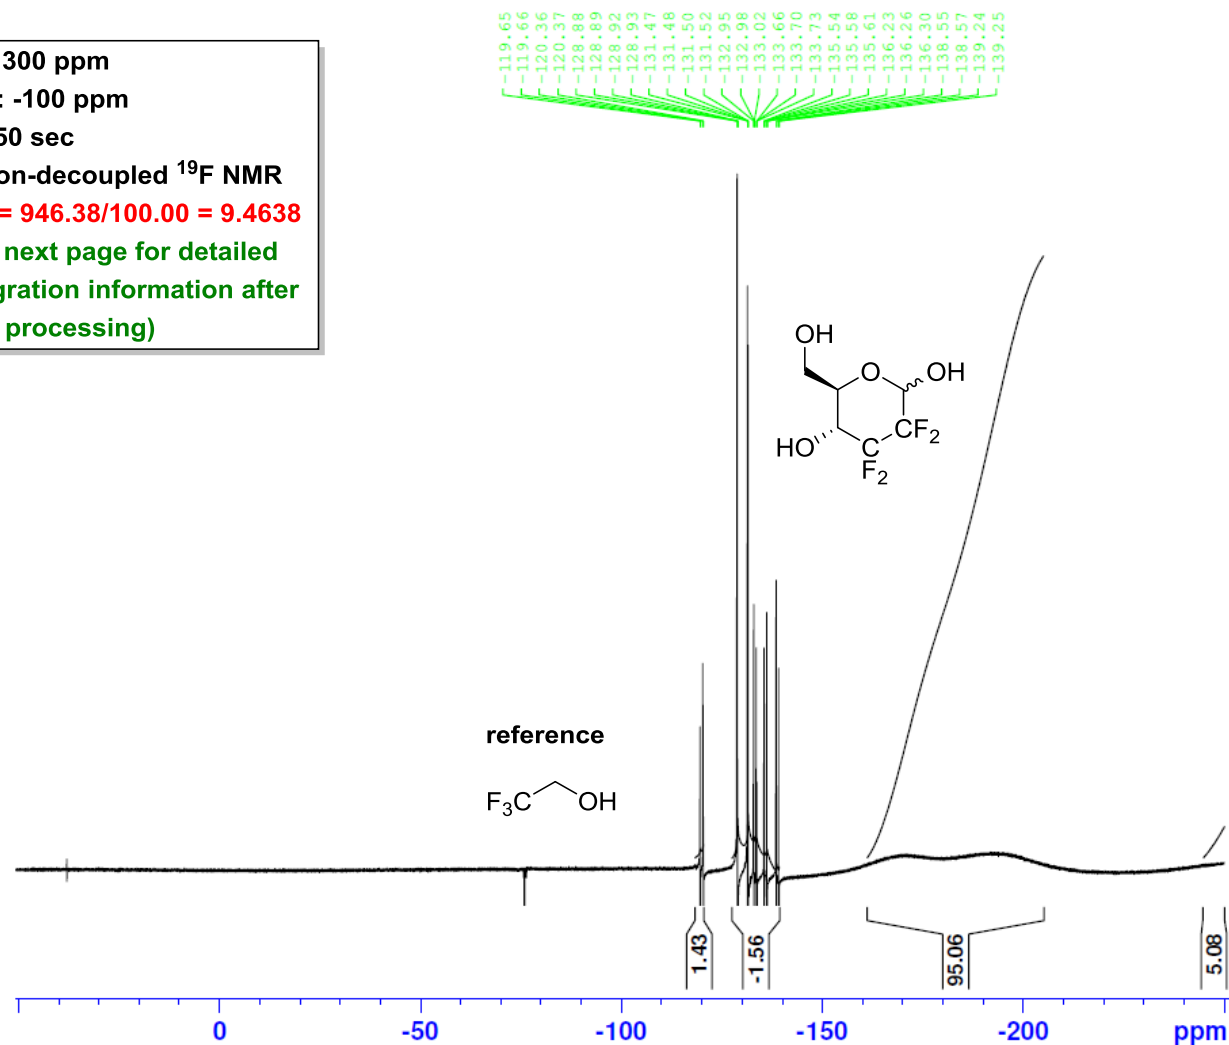

UNIVERSITY OF  
 Southampton

AVIIHD400 [3]

Current Data Parameters  
 NAME ju2314zw2  
 EXPNO 11  
 PROCNO 1

F2 - Acquisition Parameters  
 Date\_ 20140623  
 Time 11.39  
 INSTRUM spect  
 PROBHD 5 mm PABBO BB/  
 PULPROG zgfhigqn.2  
 TD 131072  
 SOLVENT Acetone  
 NS 64  
 DS 4  
 SWH 113636.367 Hz  
 FIDRES 0.866977 Hz  
 AQ 0.5767168 sec  
 RG 212.69  
 DW 4.400 usec  
 DE 6.50 usec  
 TE 298.0 K  
 D1 50.0000000 sec  
 D11 0.0300000 sec  
 D12 0.0000200 sec  
 TD0 1

===== CHANNEL f1 =====  
 SFO1 376.4607164 MHz  
 NUC1 19F  
 P1 11.70 usec  
 PLW1 32.00000000 W

===== CHANNEL f2 =====  
 SFO2 400.1316005 MHz  
 NUC2 1H  
 CPDPRG[2] waltz16  
 PCPD2 70.00 usec  
 PLW2 32.00000000 W  
 PLW12 0.31999999 W

F2 - Processing parameters  
 SI 65536  
 SF 376.4980709 MHz  
 WDW EM  
 SSB 0  
 LB 0.30 Hz  
 GB 0  
 PC 1.00



## 14.21. 2,3,4-Trideoxy-2,3,4-trifluoro-D-glucose (55), Entry 1, octanol sample

ZW7157-55 OCT with capillary tube for lock



AVIIHD400 [3]

SW: 300 ppm  
 O1P: -210 ppm  
 D1: 60 sec  
 proton-decoupled <sup>19</sup>F NMR  
 $\rho_{\text{oct}} = 121.17/100.00 = 1.2117$   
 (see next page for detailed  
 integration information after  
 data processing)

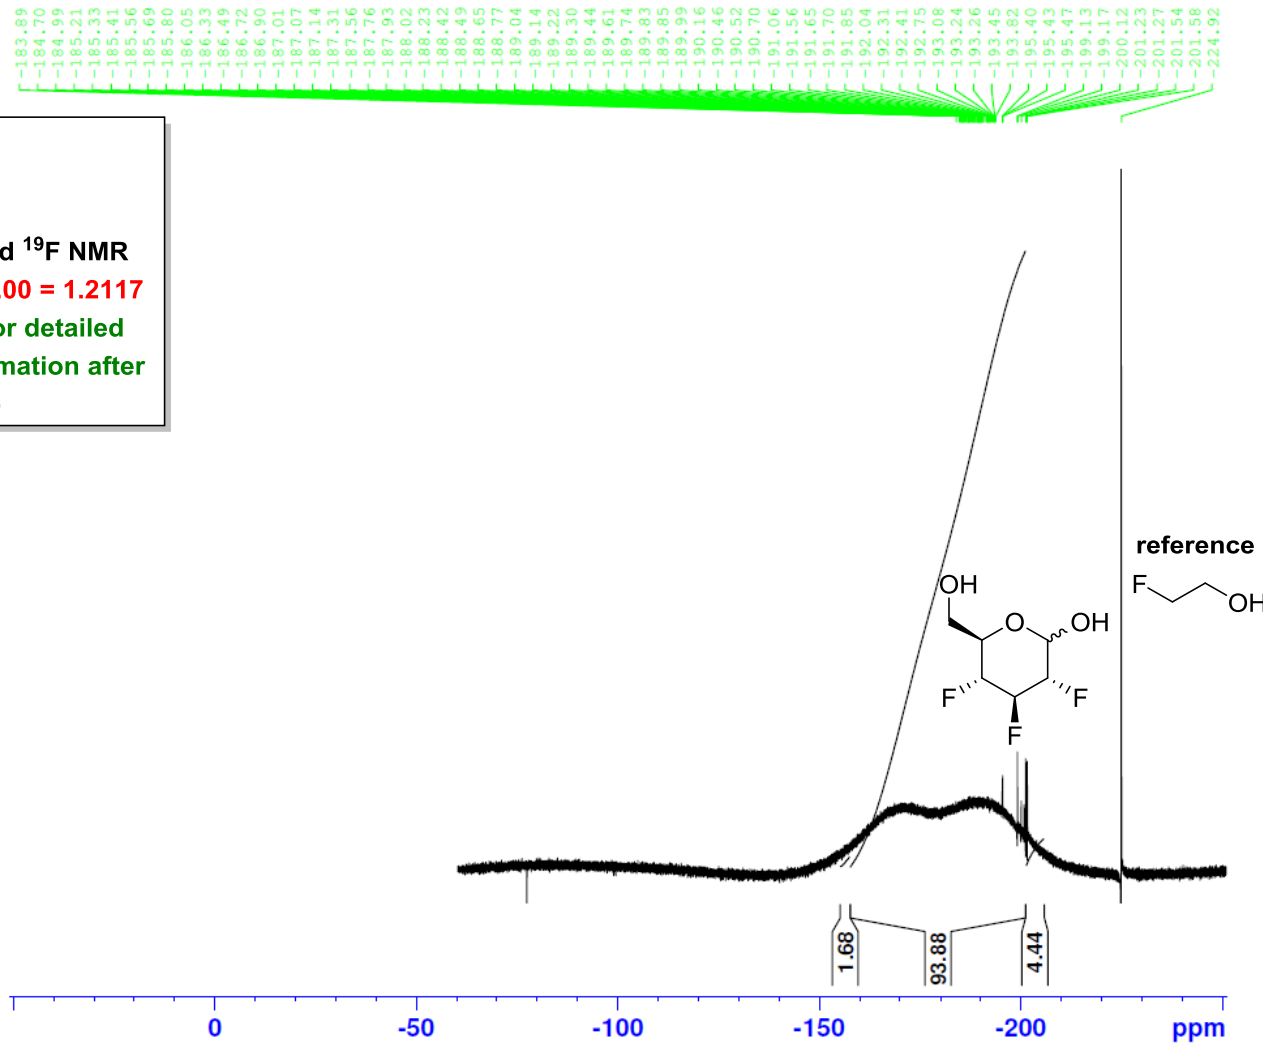

Current Data Parameters  
 NAME nv2514zw1  
 EXPNO 10  
 PROCNO 1

F2 - Acquisition Parameters  
 Date\_ 20141125  
 Time 15.14  
 INSTRUM spect  
 PROBHD 5 mm PABBO BB/  
 PULPROG zgfhigqn.2  
 TD 131072  
 SOLVENT Acetone  
 NS 64  
 DS 4  
 SWH 113636.367 Hz  
 FIDRES 0.866977 Hz  
 AQ 0.5767168 sec  
 RG 212.69  
 DW 4.400 usec  
 DE 6.50 usec  
 TE 298.0 K  
 D1 60.0000000 sec  
 D11 0.03000000 sec  
 D12 0.00002000 sec  
 TD0 1

===== CHANNEL f1 =====  
 SFO1 376.4185522 MHz  
 NUC1 19F  
 P1 11.70 usec  
 PLW1 32.00000000 W

===== CHANNEL f2 =====  
 SFO2 400.1316005 MHz  
 NUC2 1H  
 CPDPRG[2] waltz16  
 PCPD2 70.00 usec  
 PLW2 32.00000000 W  
 PLW12 0.319999999 W

F2 - Processing parameters  
 SI 65536  
 SF 376.4980709 MHz  
 WDW EM  
 SSB 0  
 LB 0.30 Hz  
 GB 0  
 PC 1.00

ZW7157-55 OCT with capillary tube for lock

RMS of Noise 86845.1172

|                        |                      |                   |                                                                         |                        |                      |                      |             |
|------------------------|----------------------|-------------------|-------------------------------------------------------------------------|------------------------|----------------------|----------------------|-------------|
| Acquisition Time (sec) | 0.5767               | Comment           | ZW7157-55 OCT with capillary tube for lock                              | Date                   | 25 Nov 2014 15:13:04 |                      |             |
| Date Stamp             | 25 Nov 2014 15:13:04 | File Name         | \\soton.ac.uk\lud\personalfiles\users\zw3g10\mydesktop\nv2514zw1\10\fid |                        |                      |                      |             |
| Frequency (MHz)        | 376.42               | Nucleus           | <sup>19</sup> F                                                         | Number of Transients   | 64                   | Origin               | spect       |
| Original Points Count  | 65536                | Owner             | nmr                                                                     | Points Count           | 262144               | Pulse Sequence       | zgfhighn.2  |
| Receiver Gain          | 212.69               | SW(cyclical) (Hz) | 113636.36                                                               | Solvent                | Acetone              | Spectrum Offset (Hz) | -79813.8125 |
| Spectrum Type          | STANDARD             | Sweep Width (Hz)  | 113635.93                                                               | Temperature (degree C) | 25.004               |                      |             |

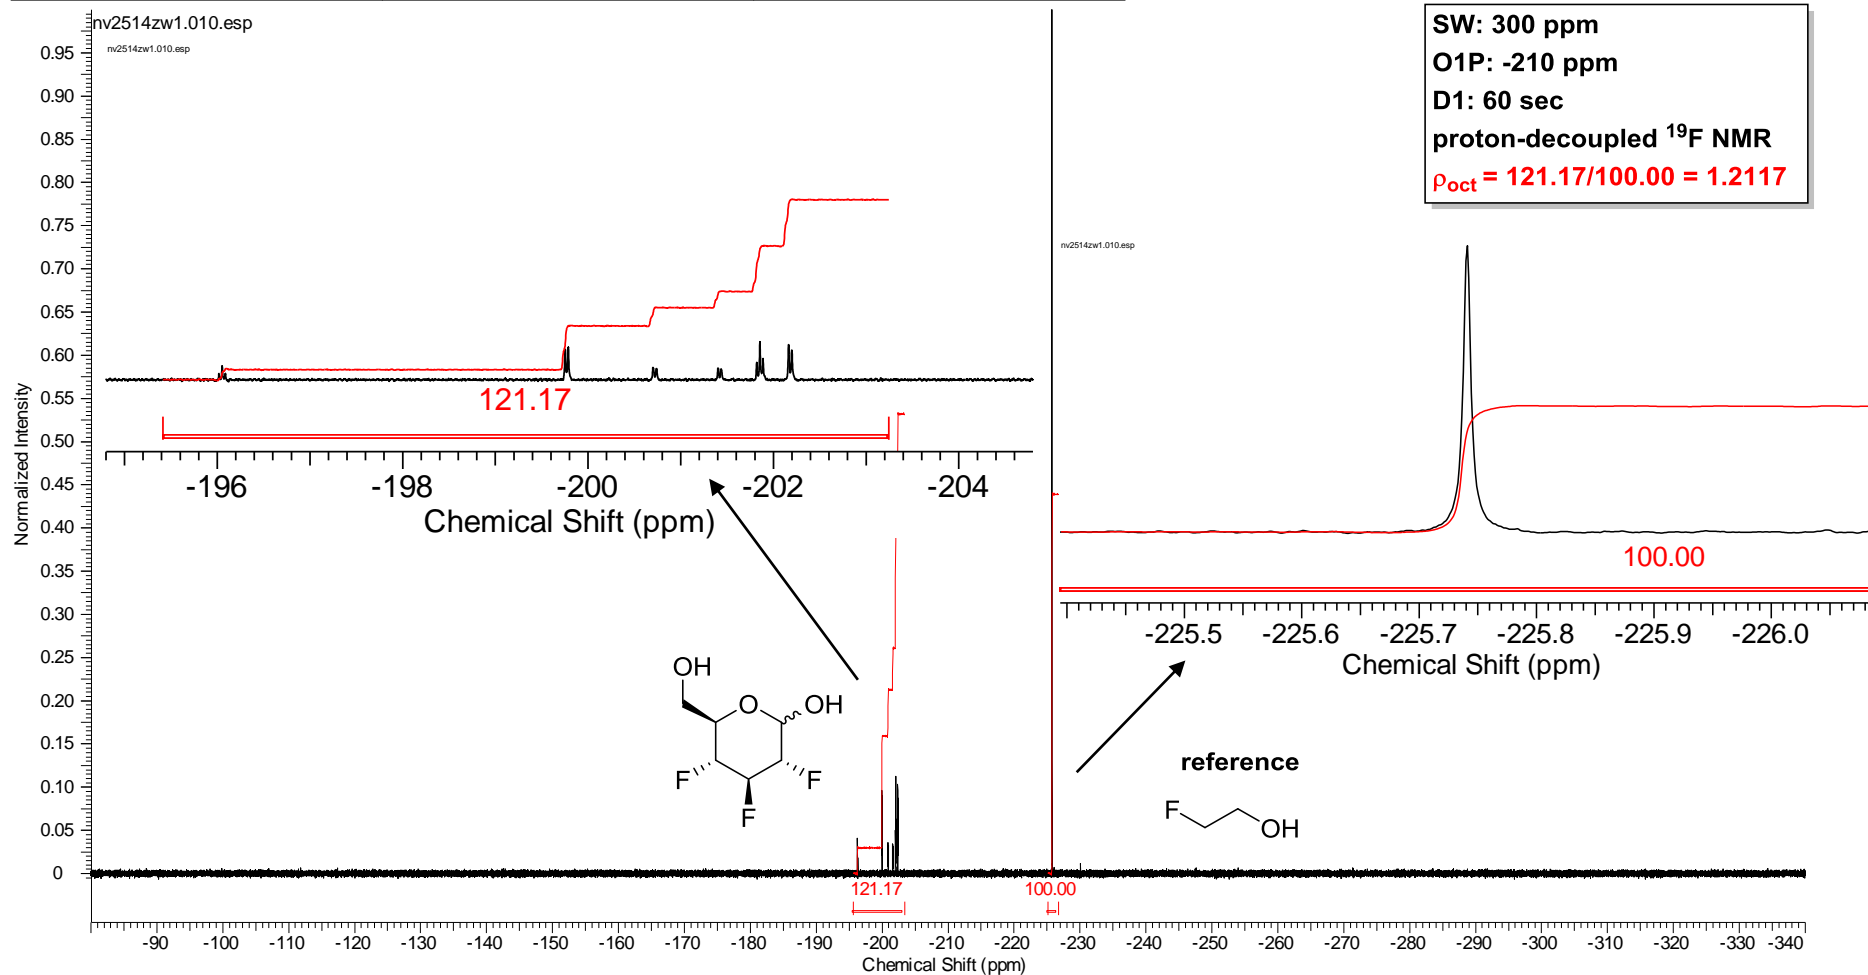

## 14.22. 2,3,4-Trideoxy-2,3,4-trifluoro-D-glucose (55), Entry 1, water sample

ZW7157-55 WAT with capillary tube for lock

SW: 300 ppm  
 O1P: -210 ppm  
 D1: 60 sec  
 proton-decoupled  $^{19}\text{F}$  NMR  
 $\rho_{\text{wat}} = 31.90/100.00 = 0.3190$   
 (see next page for detailed  
 integration information after  
 data processing)

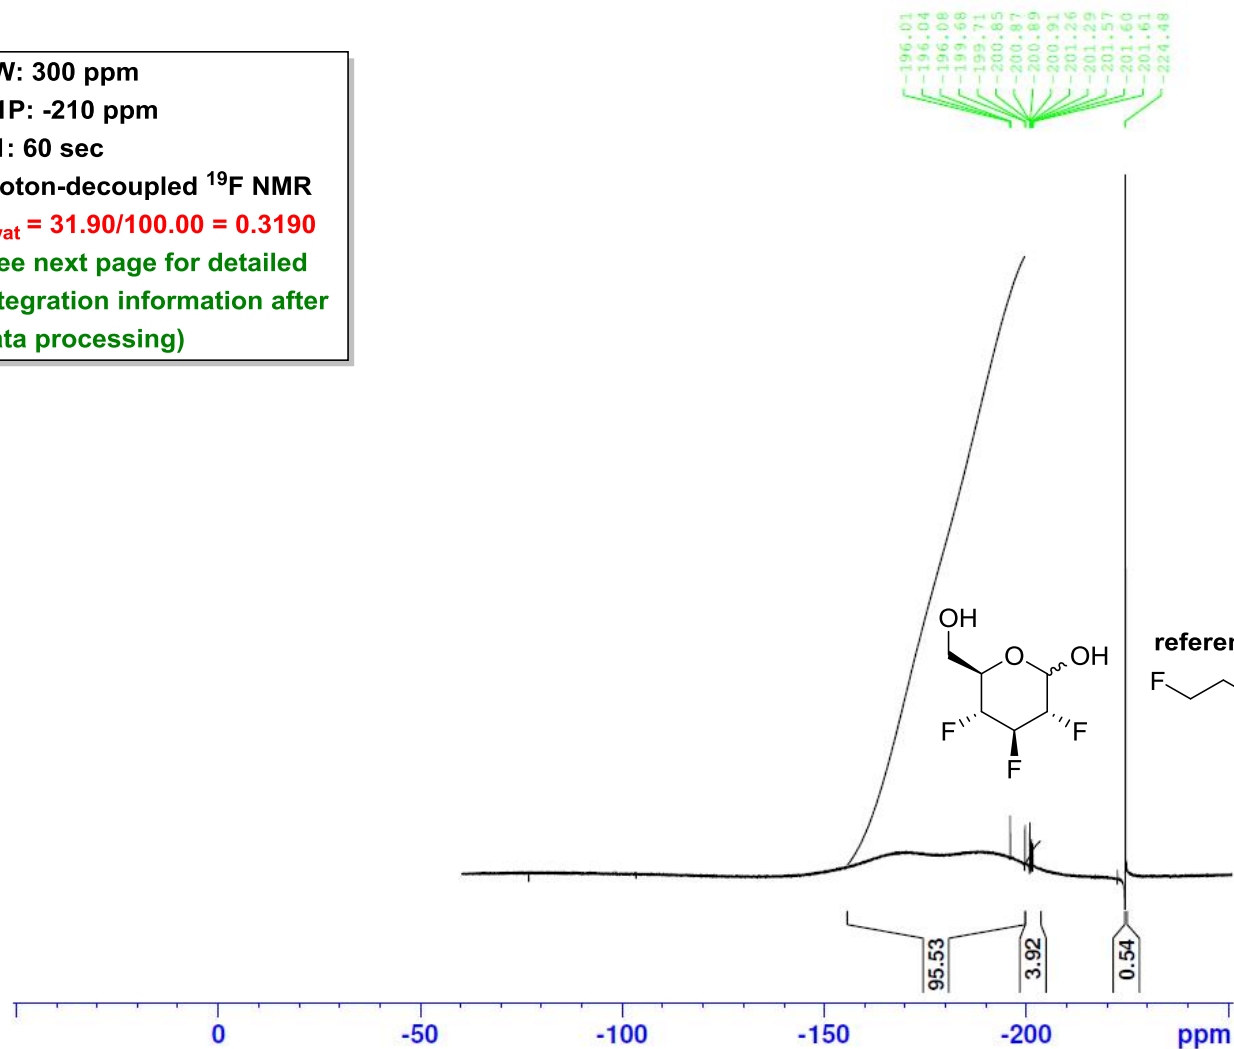

UNIVERSITY OF  
 Southampton

AVIIHD400 [3]

Current Data Parameters  
 NAME nv2514zw2  
 EXPNO 10  
 PROCNO 1

F2 - Acquisition Parameters  
 Date\_ 20141125  
 Time 16.28  
 INSTRUM spect  
 PROBHD 5 mm PABBO BB/  
 PULPROG zgfhigqn.2  
 TD 131072  
 SOLVENT Acetone  
 NS 64  
 DS 4  
 SWH 113636.367 Hz  
 FIDRES 0.866977 Hz  
 AQ 0.5767168 sec  
 RG 212.69  
 DW 4.400 usec  
 DE 6.50 usec  
 TE 298.0 K  
 D1 60.00000000 sec  
 D11 0.03000000 sec  
 D12 0.00002000 sec  
 TD0 1

===== CHANNEL f1 =====  
 SFO1 376.4185522 MHz  
 NUC1 19F  
 P1 11.70 usec  
 PLW1 32.00000000 W

===== CHANNEL f2 =====  
 SFO2 400.1316005 MHz  
 NUC2 1H  
 CPDPRG[2] waltz16  
 PCPD2 70.00 usec  
 PLW2 32.00000000 W  
 PLW12 0.31999999 W

F2 - Processing parameters  
 SI 65536  
 SF 376.4980709 MHz  
 WDW EM  
 SSB 0  
 LB 0.30 Hz  
 GB 0  
 PC 1.00

ZW7157-55 WAT with capillary tube for lock

|                        |                      |                   |                                                                         |                        |                      |                      |             |
|------------------------|----------------------|-------------------|-------------------------------------------------------------------------|------------------------|----------------------|----------------------|-------------|
| Acquisition Time (sec) | 0.5767               | Comment           | ZW7157-55 WAT with capillary tube for lock                              | Date                   | 25 Nov 2014 16:27:44 |                      |             |
| Date Stamp             | 25 Nov 2014 16:27:44 | File Name         | \\soton.ac.uk\lud\personalfiles\users\zw3g10\mydesktop\nv2514zw2\10\fid |                        |                      |                      |             |
| Frequency (MHz)        | 376.42               | Nucleus           | 19F                                                                     | Number of Transients   | 64                   | Origin               | spect       |
| Original Points Count  | 65536                | Owner             | nmr                                                                     | Points Count           | 262144               | Pulse Sequence       | zgfhighn.2  |
| Receiver Gain          | 212.69               | SW(cyclical) (Hz) | 113636.36                                                               | Solvent                | Acetone              | Spectrum Offset (Hz) | -79813.8125 |
| Spectrum Type          | STANDARD             | Sweep Width (Hz)  | 113635.93                                                               | Temperature (degree C) | 25.006               |                      |             |

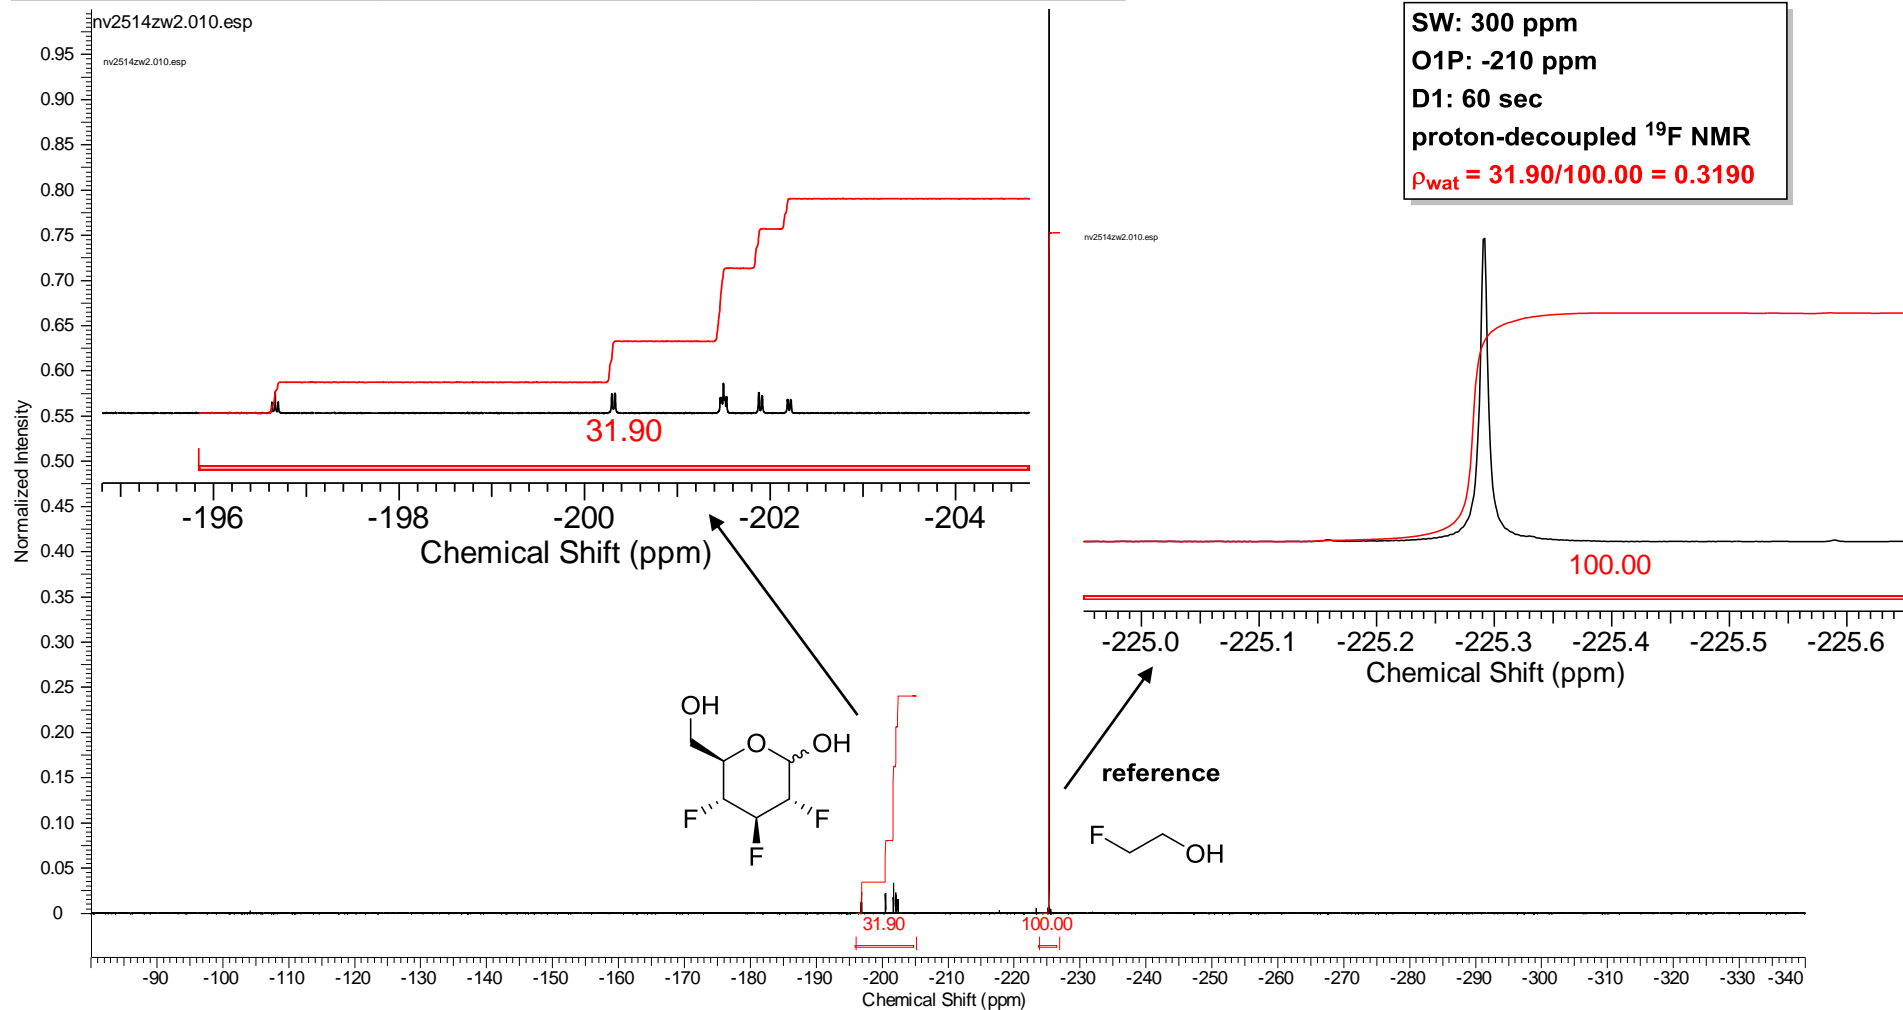



## 15. NMR spectra for novel compounds

### 15.1. Synthesis of 3-fluorobutan-1-ol (22)

#### 15.1.1. Synthesis of 3-fluorobut-1-yl benzoate (SI6) and 4-fluorobut-2-yl benzoate (SI7)

$^1\text{H}$  NMR,  $\text{CDCl}_3$ , 400 MHz

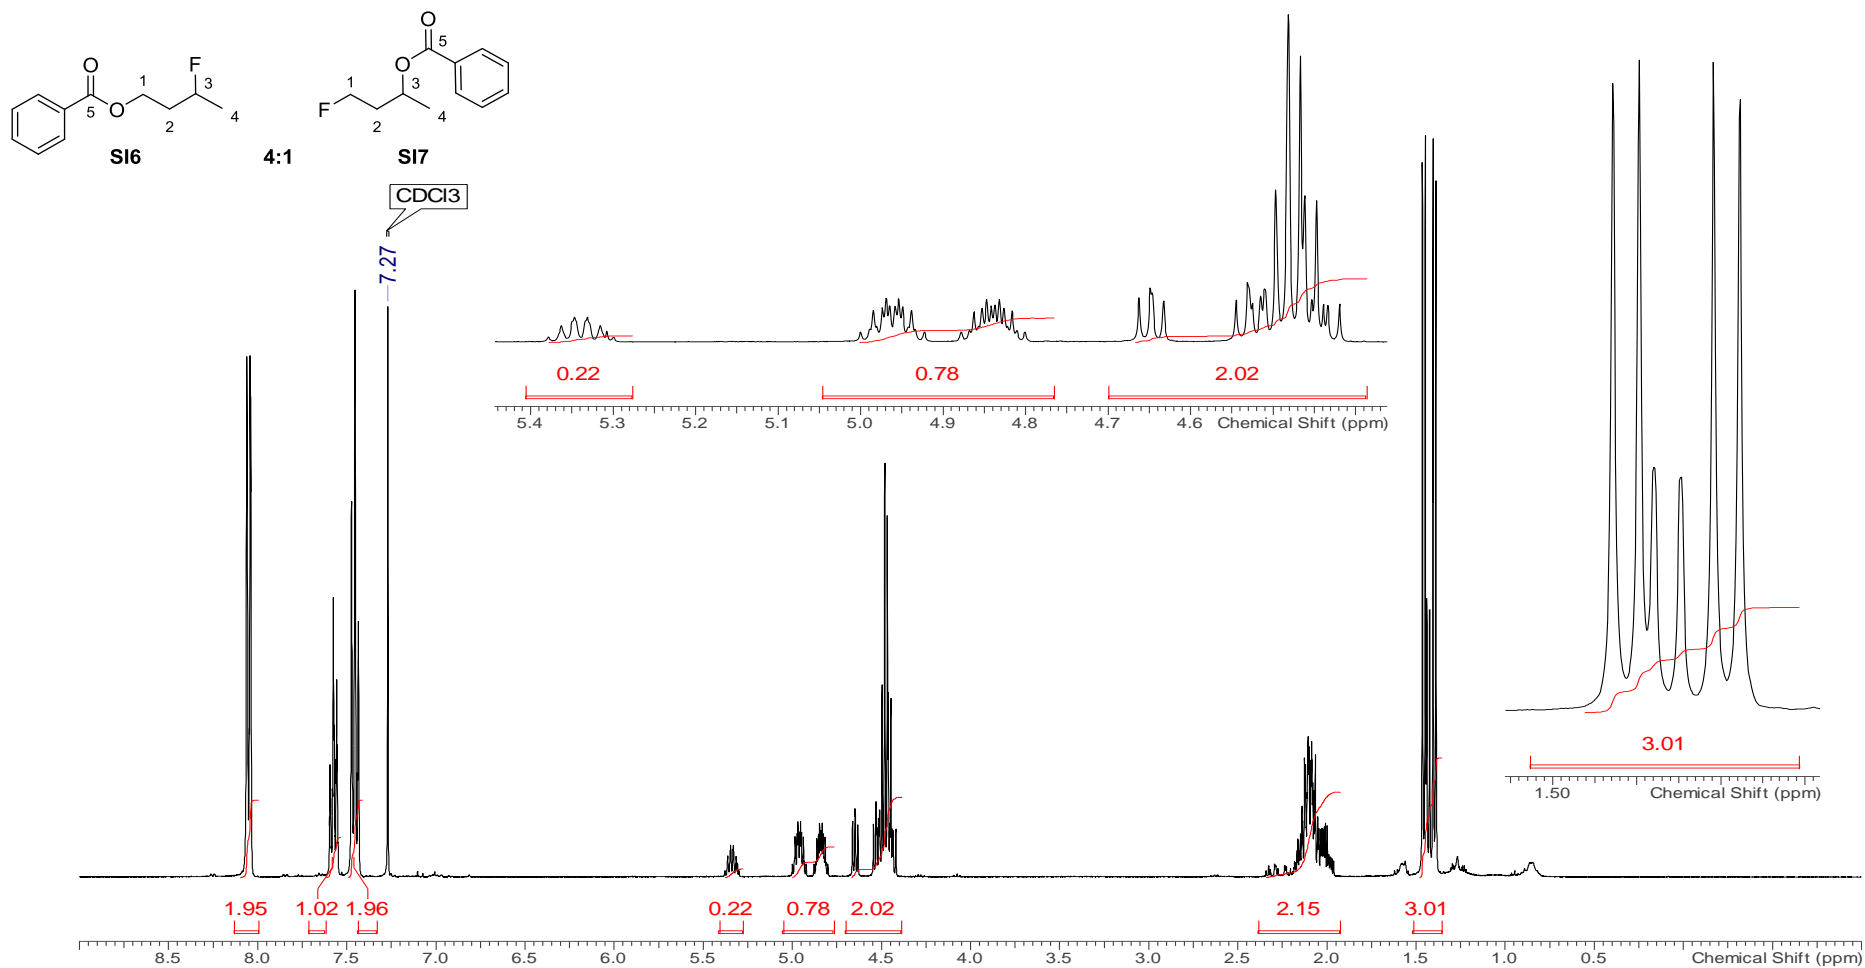

$^{19}\text{F}$  NMR,  $\text{CDCl}_3$ , 376 MHz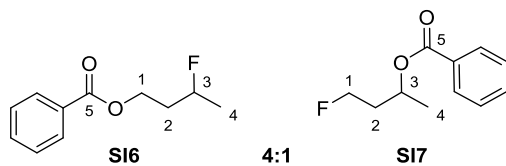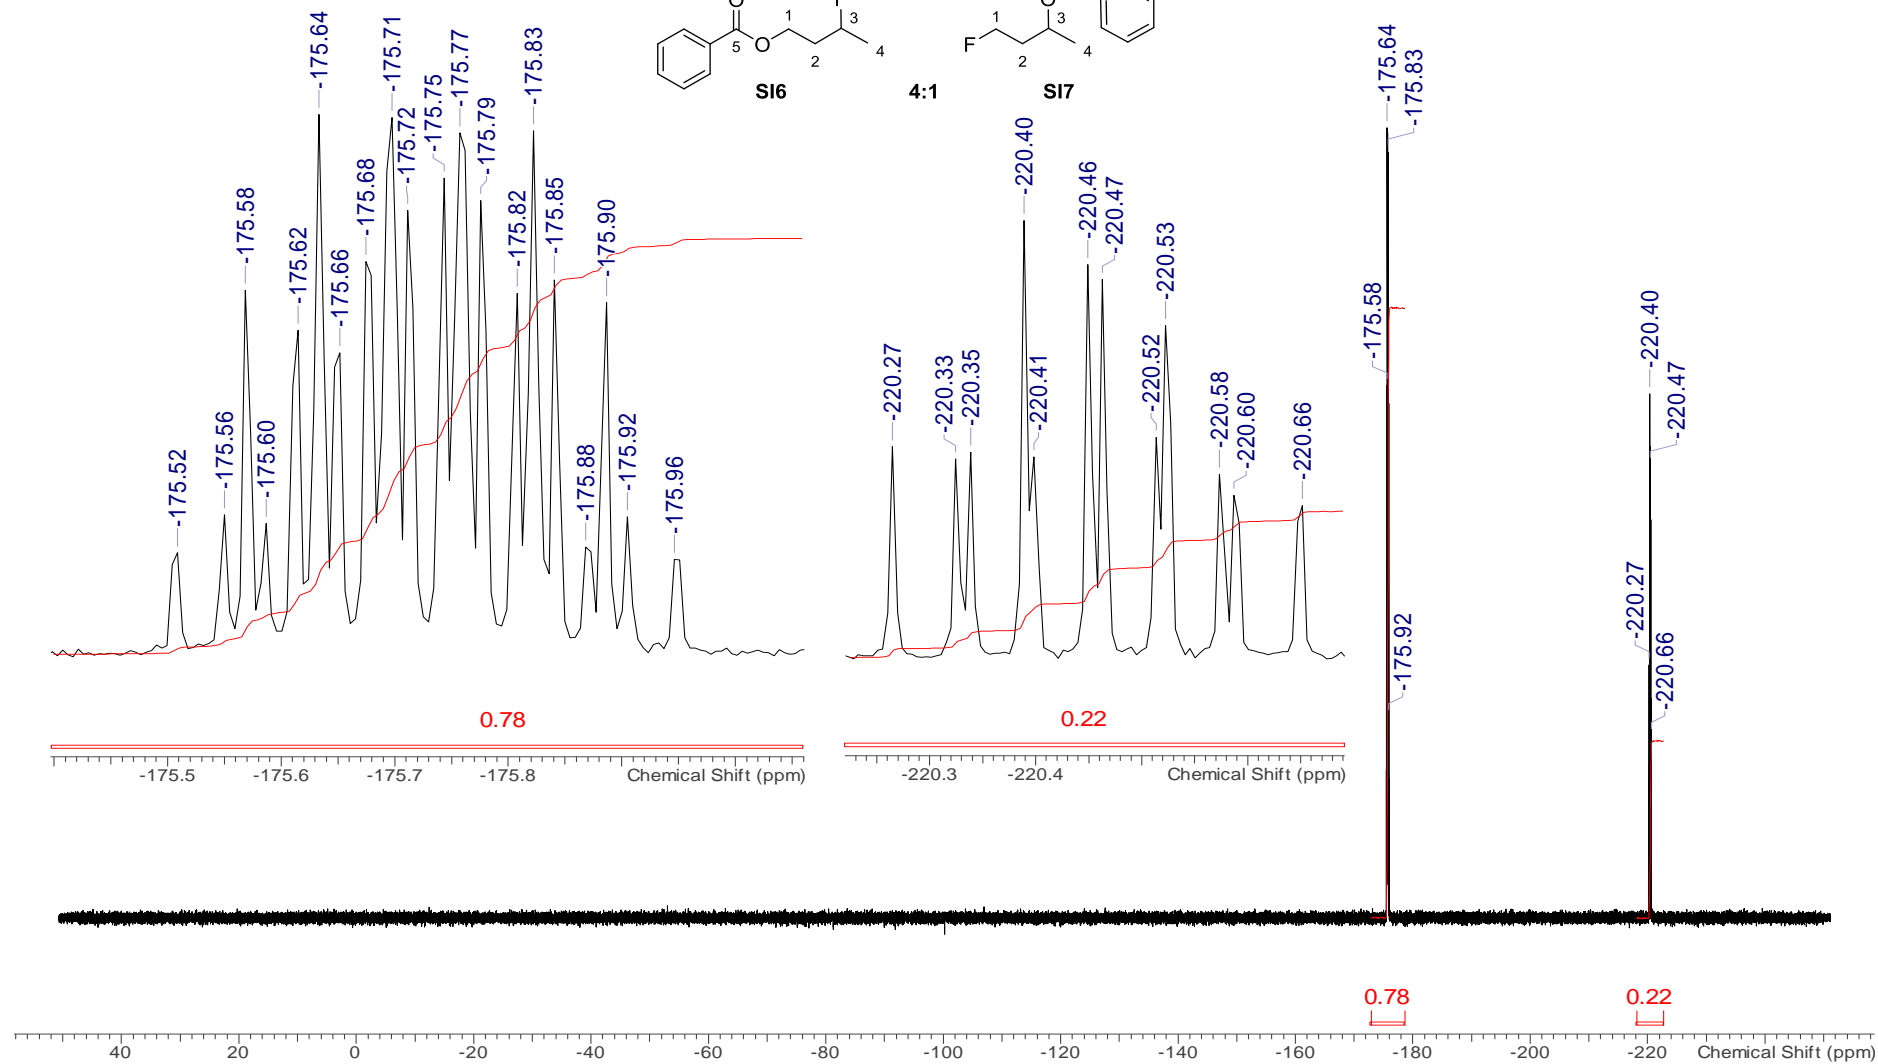

**15.1.2. Synthesis of 1-tert-butyldimethylsilyloxy-3-fluorobutane (SI8)** $^1\text{H}$  NMR,  $\text{CDCl}_3$ , 400 MHz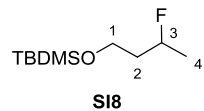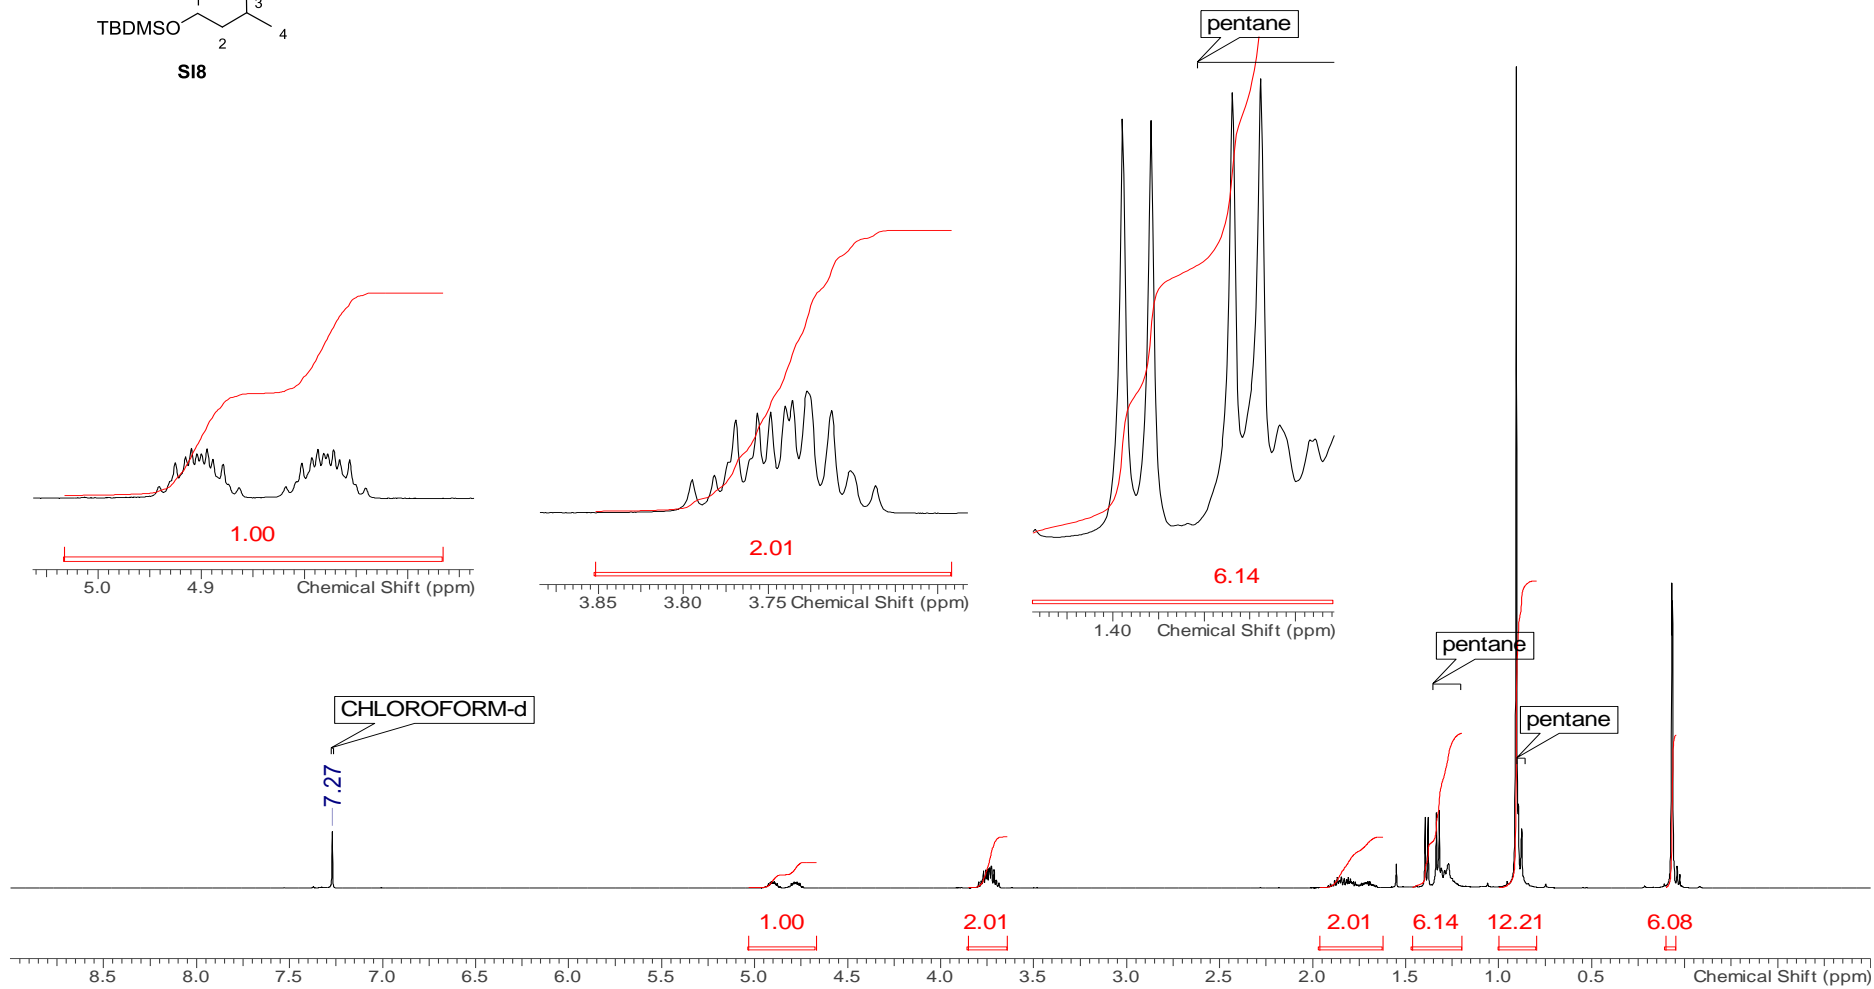

$^{13}\text{C}$  NMR,  $\text{CDCl}_3$ , 101 MHz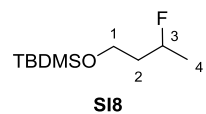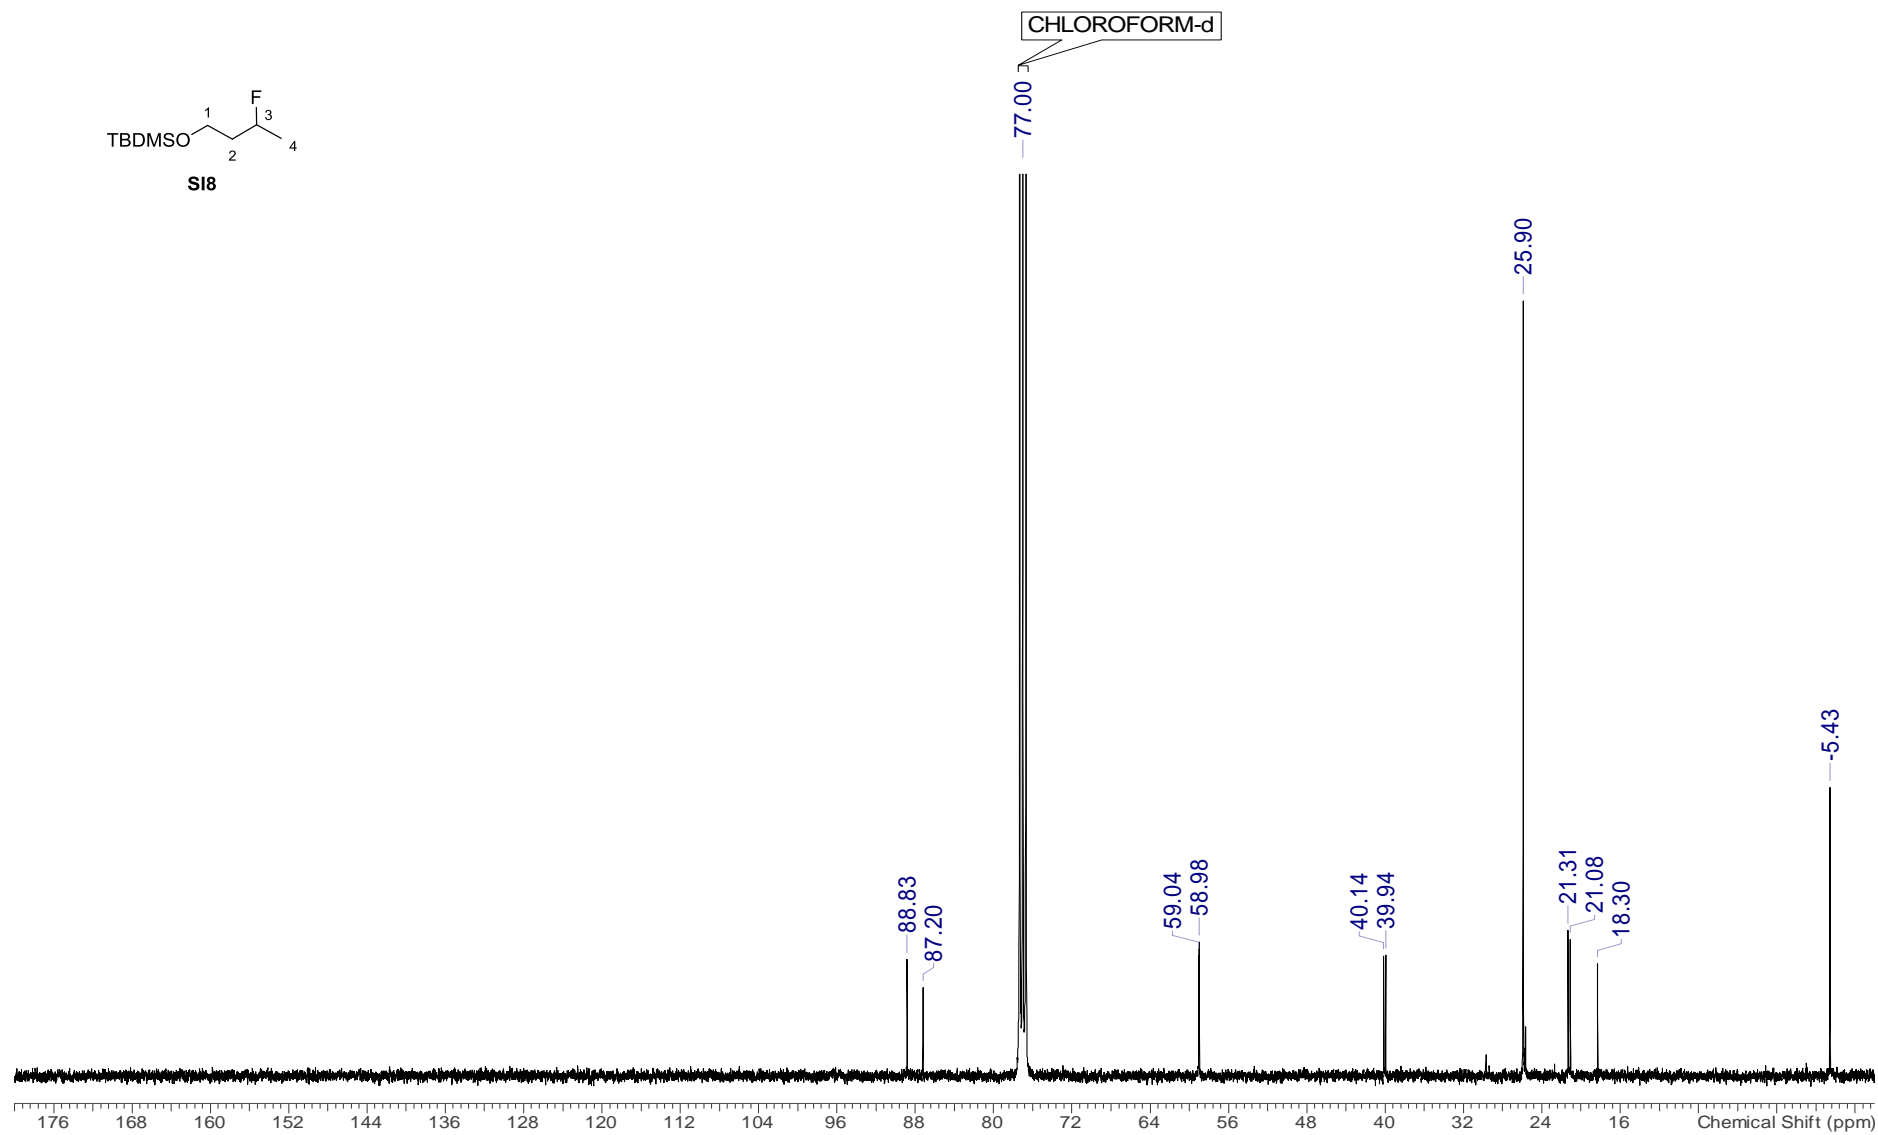

$^{19}\text{F}$  NMR,  $\text{CDCl}_3$ , 376 MHz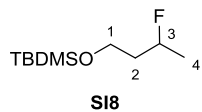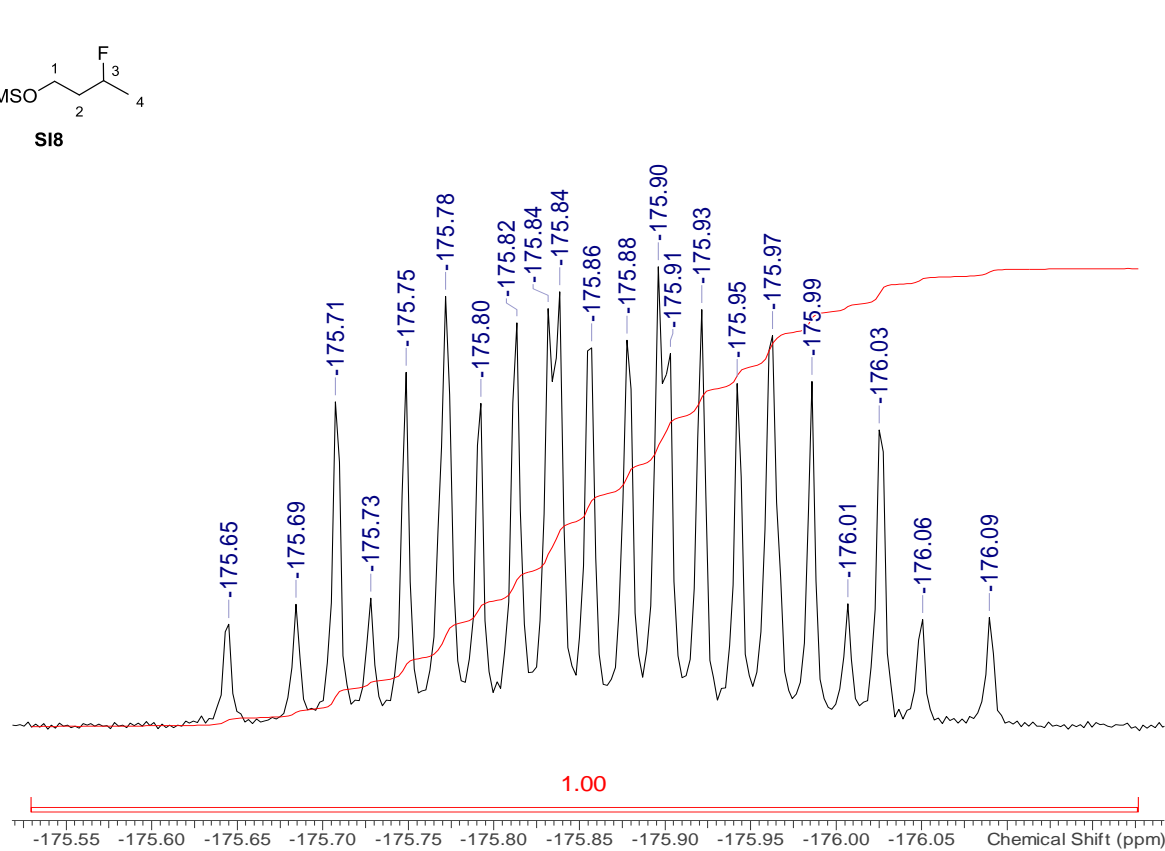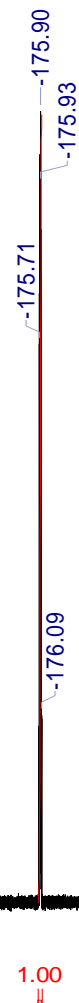

15.1.3. Synthesis of 3-fluorobutan-1-ol (**22**) $^1\text{H}$  NMR,  $\text{CDCl}_3$ , 400 MHz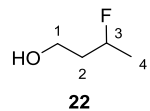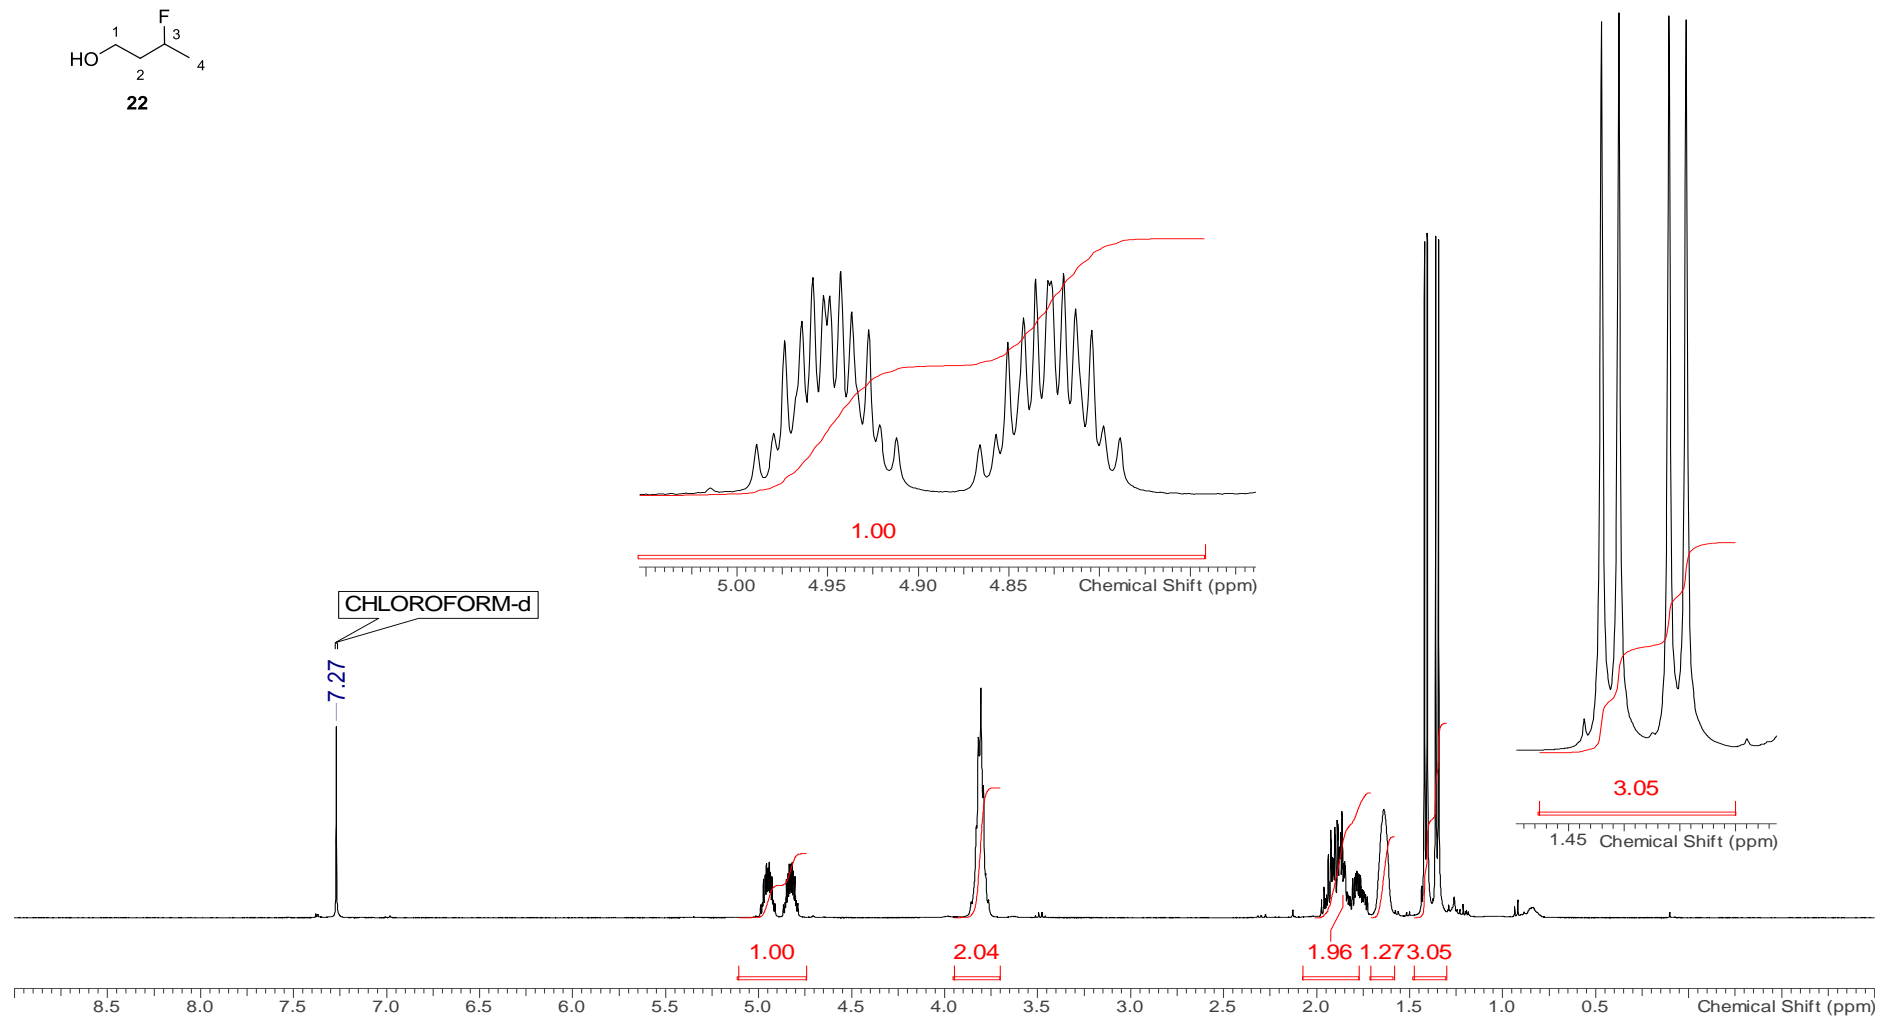

$^{13}\text{C}$  NMR,  $\text{CDCl}_3$ , 101 MHz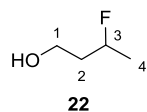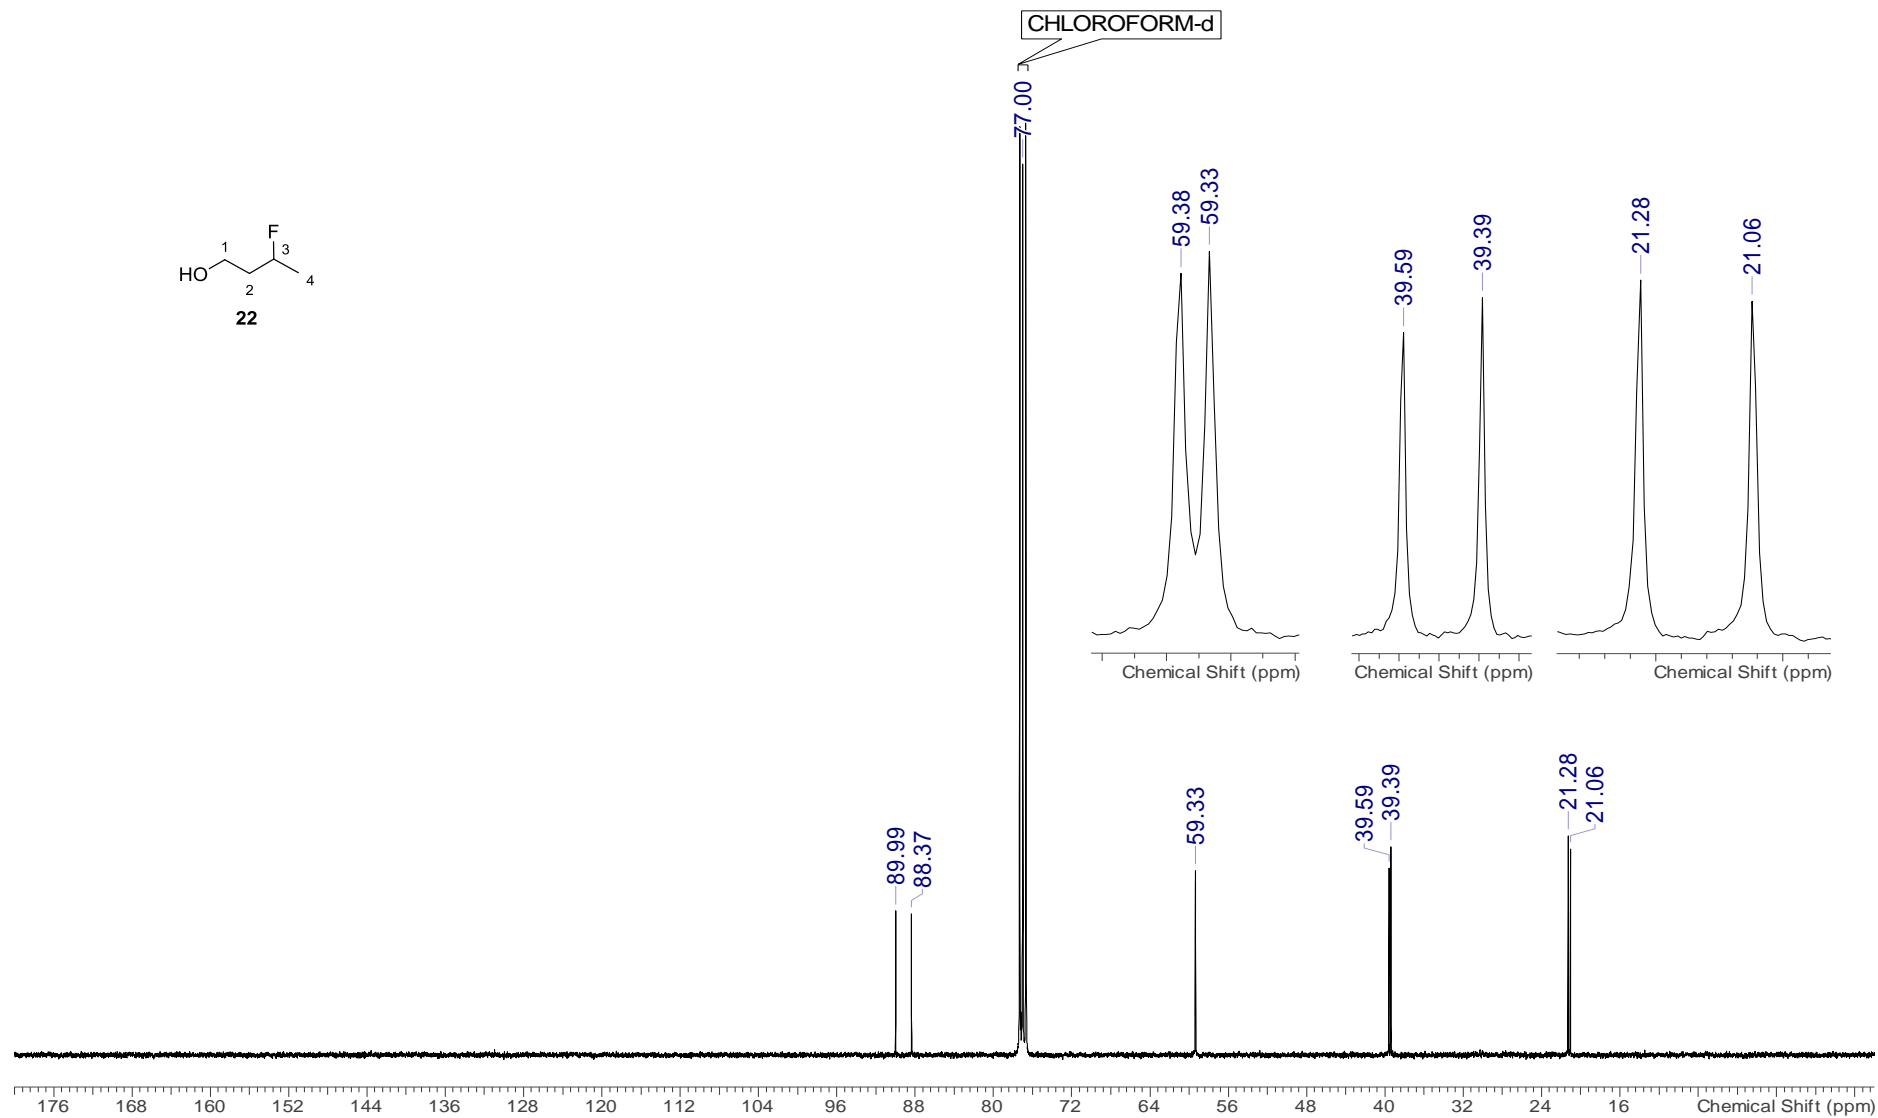

$^{19}\text{F}$  NMR,  $\text{CDCl}_3$ , 376 MHz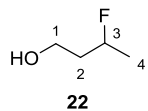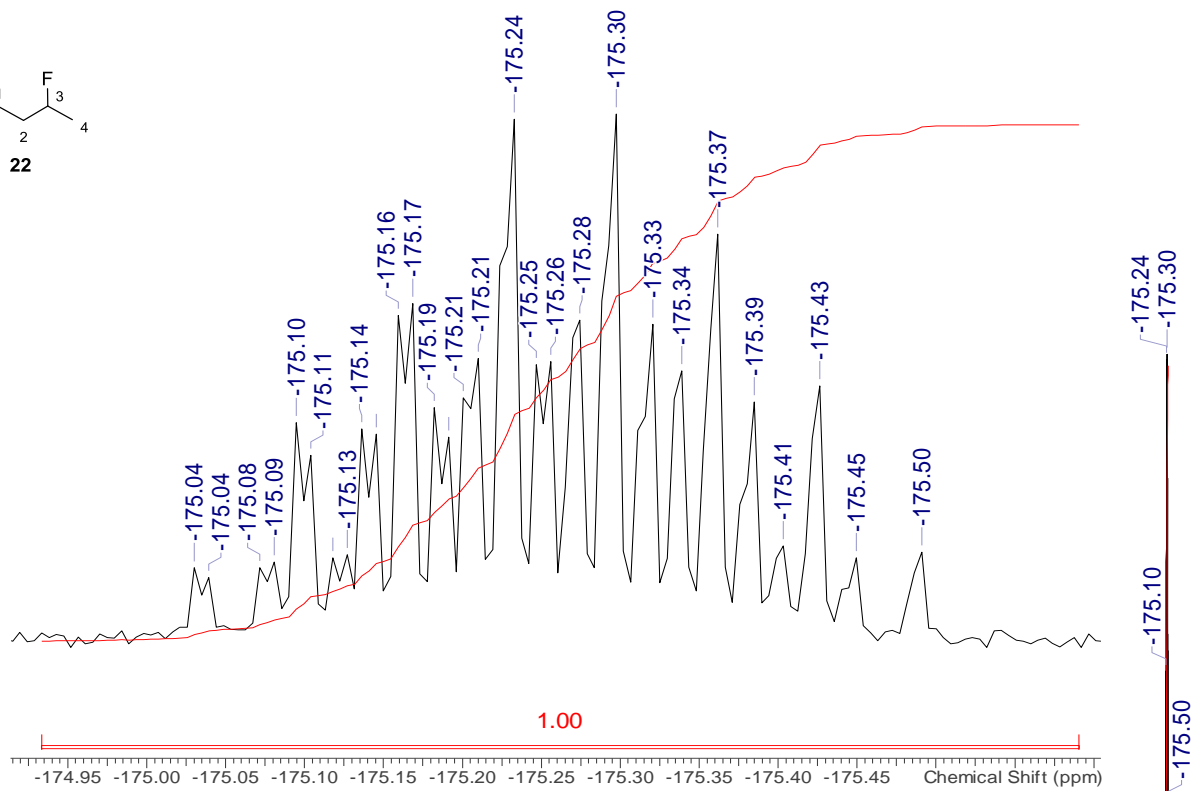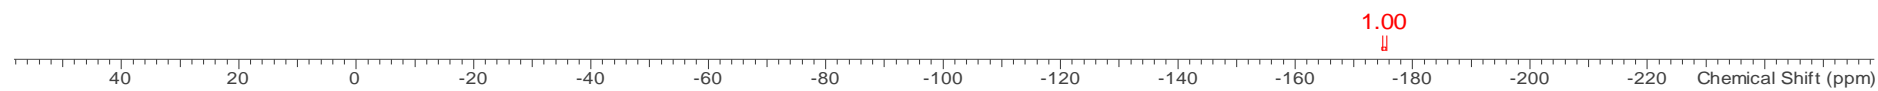



## 15.2. Synthesis of 5-fluoro-1-pentanol (30)

 $^1\text{H NMR}$ ,  $\text{CDCl}_3$ , 400 MHz

my3015cxf2.010.esp

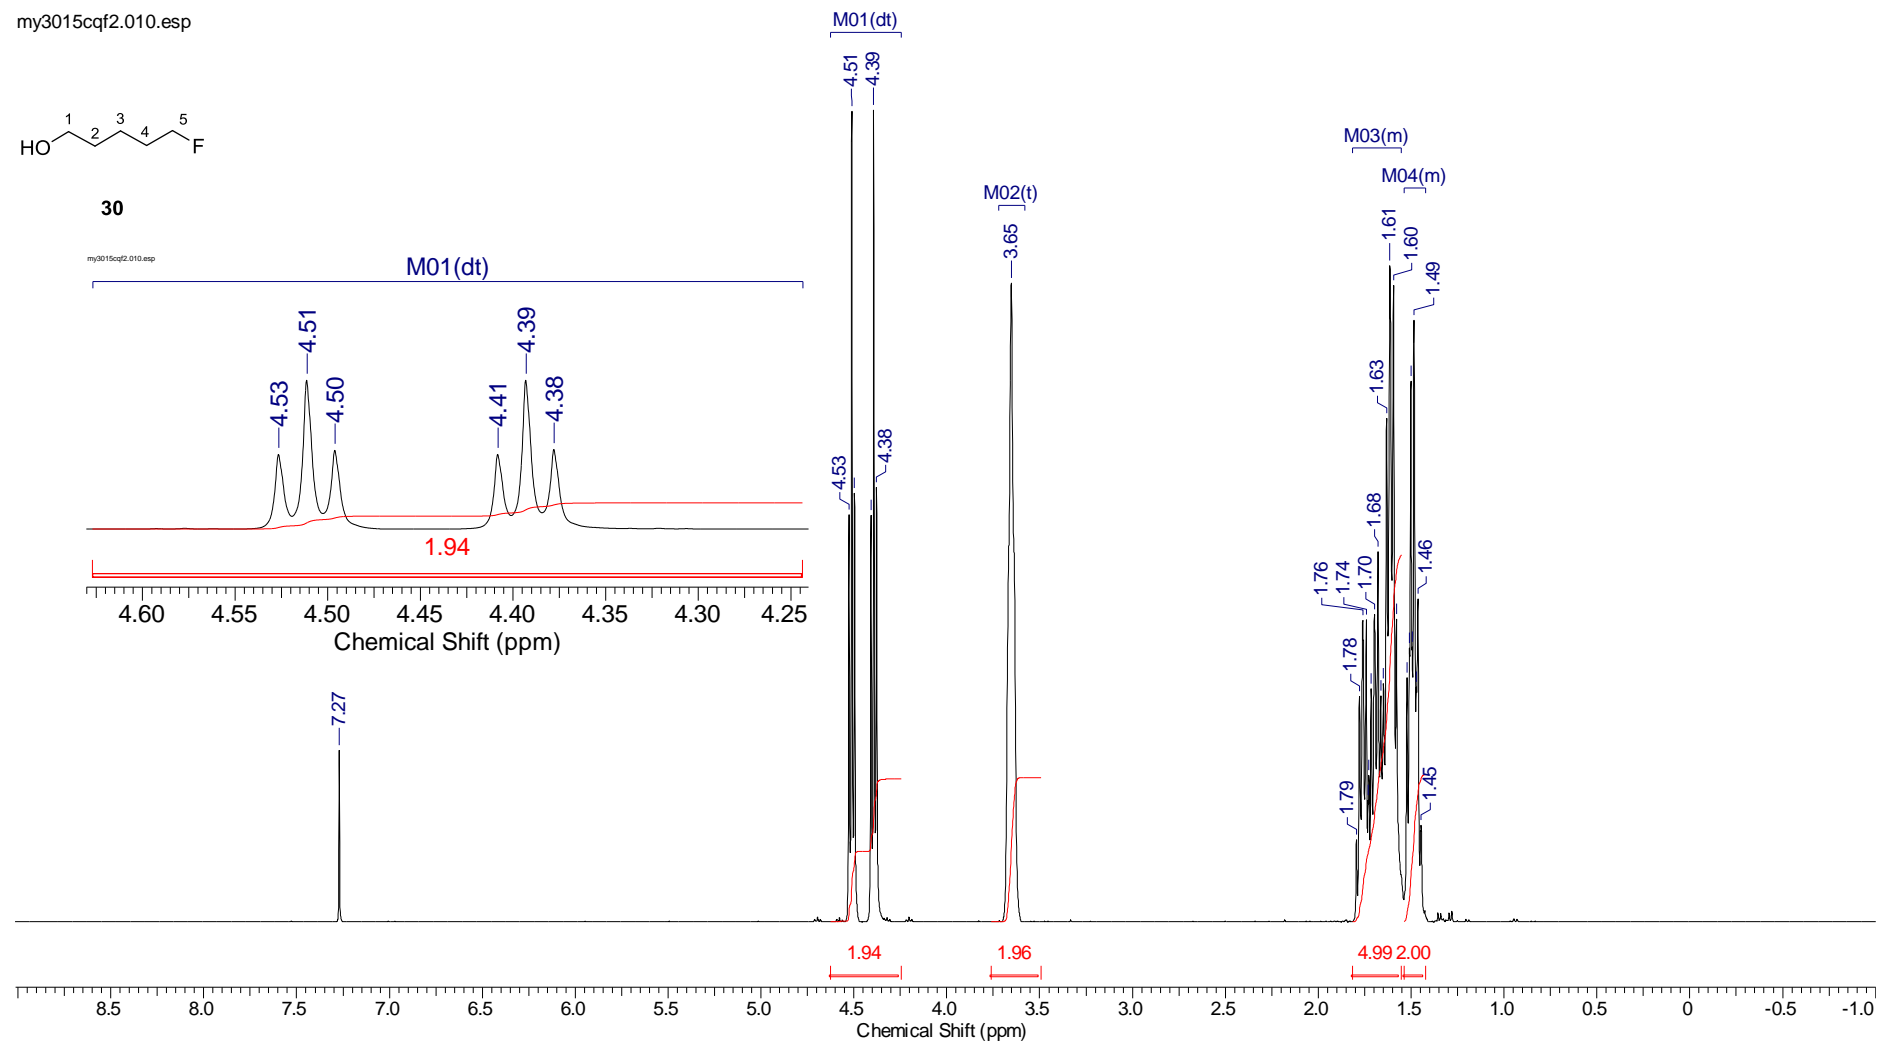

my3015cqf2.013.esp

 $^{13}\text{C}$  NMR,  $\text{CDCl}_3$ , 101 MHz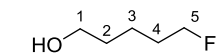

30

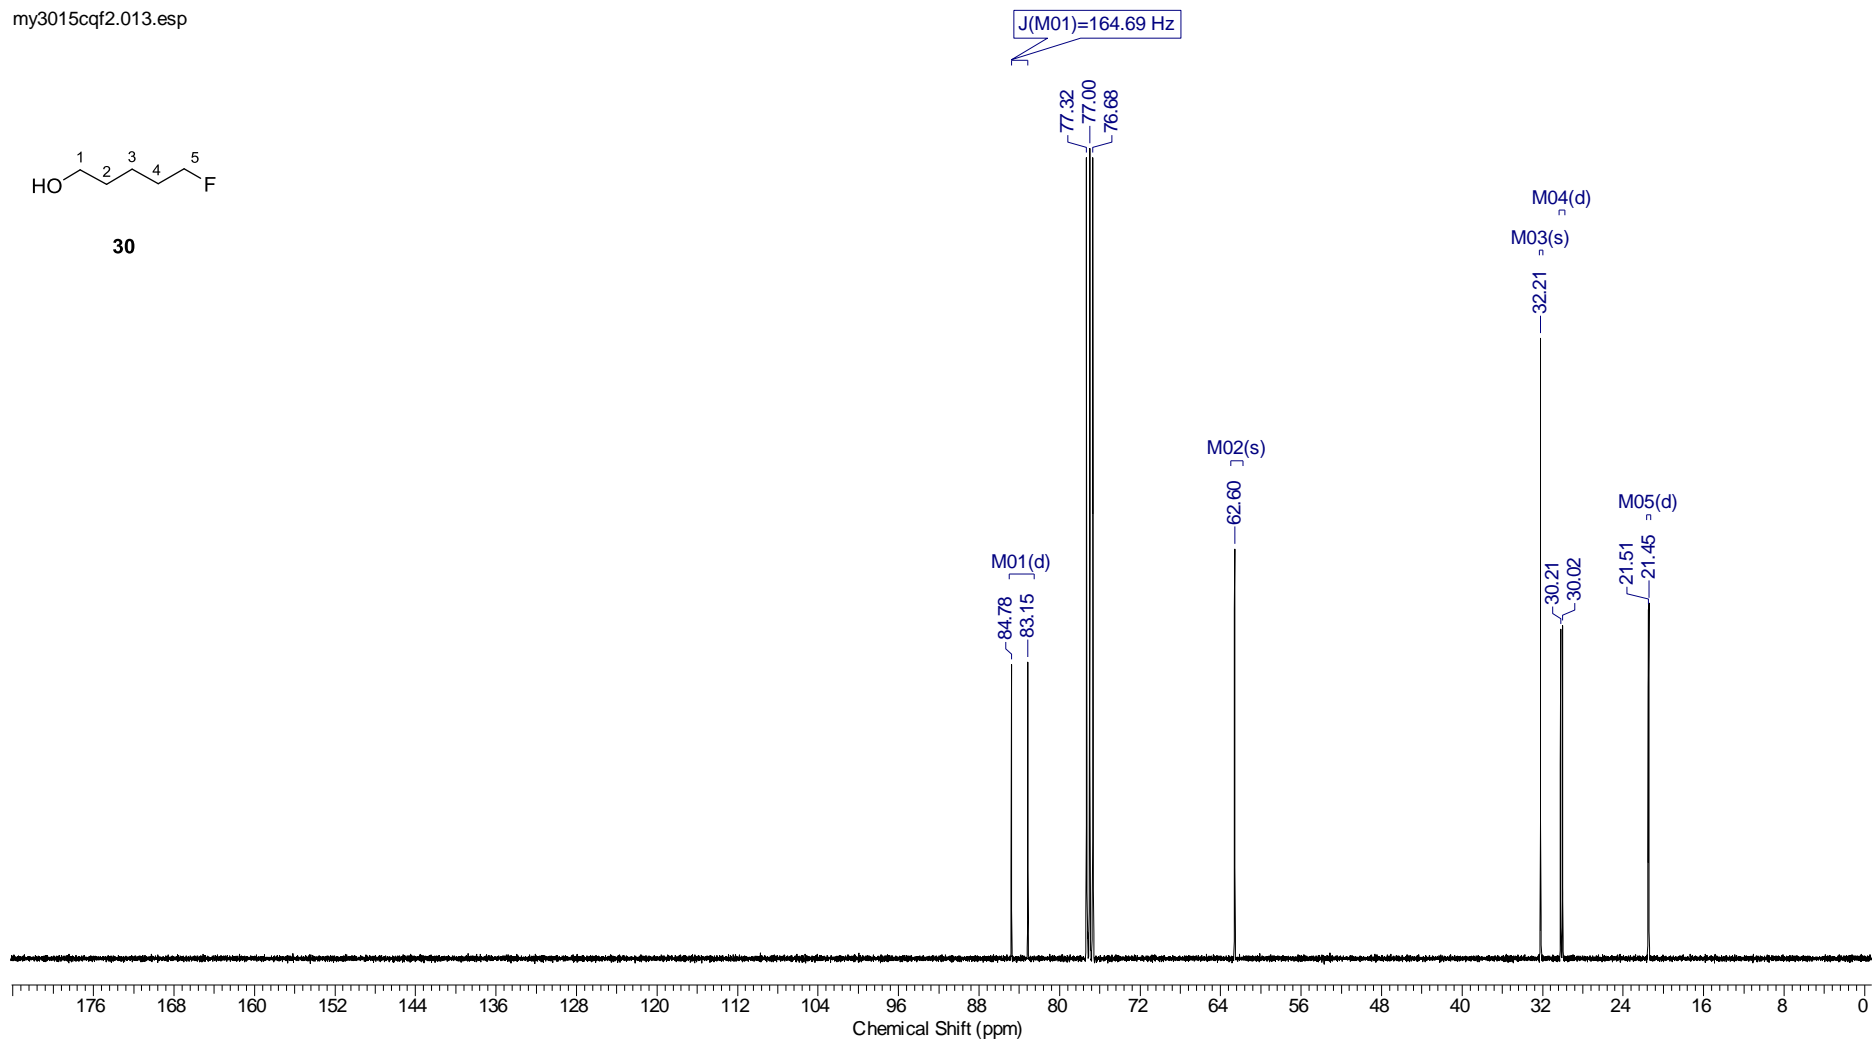

$^{19}\text{F}$  NMR,  $\text{CDCl}_3$ , 376 MHz

my3015cqqf2.011.esp

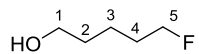**30**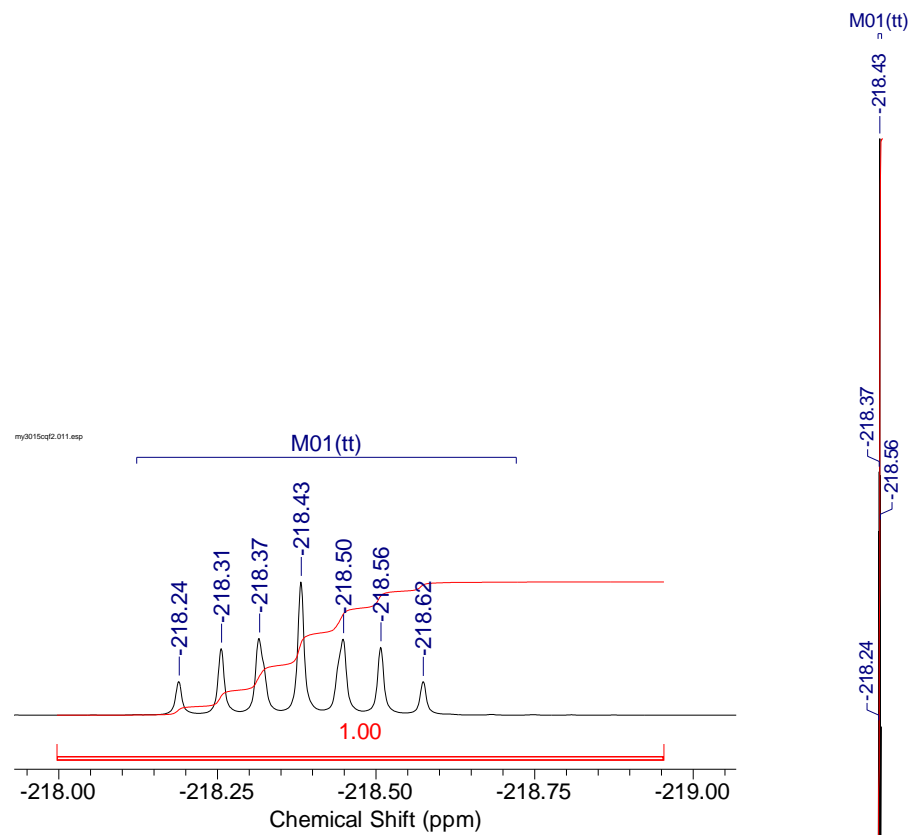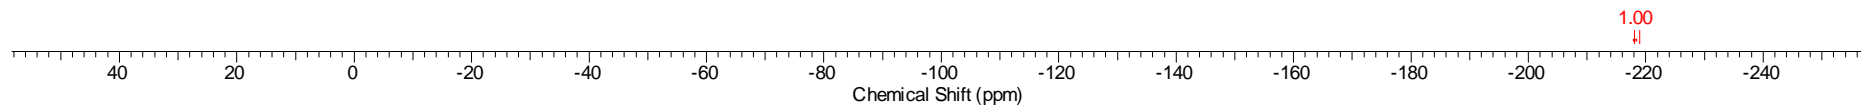

### 15.3. Synthesis of 4-fluoropentan-1-ol (31)

#### 15.3.1. Synthesis of 4-fluoropentyl benzoate (SI13)

$^1\text{H}$  NMR,  $\text{CDCl}_3$ , 400 MHz

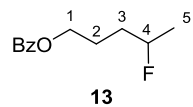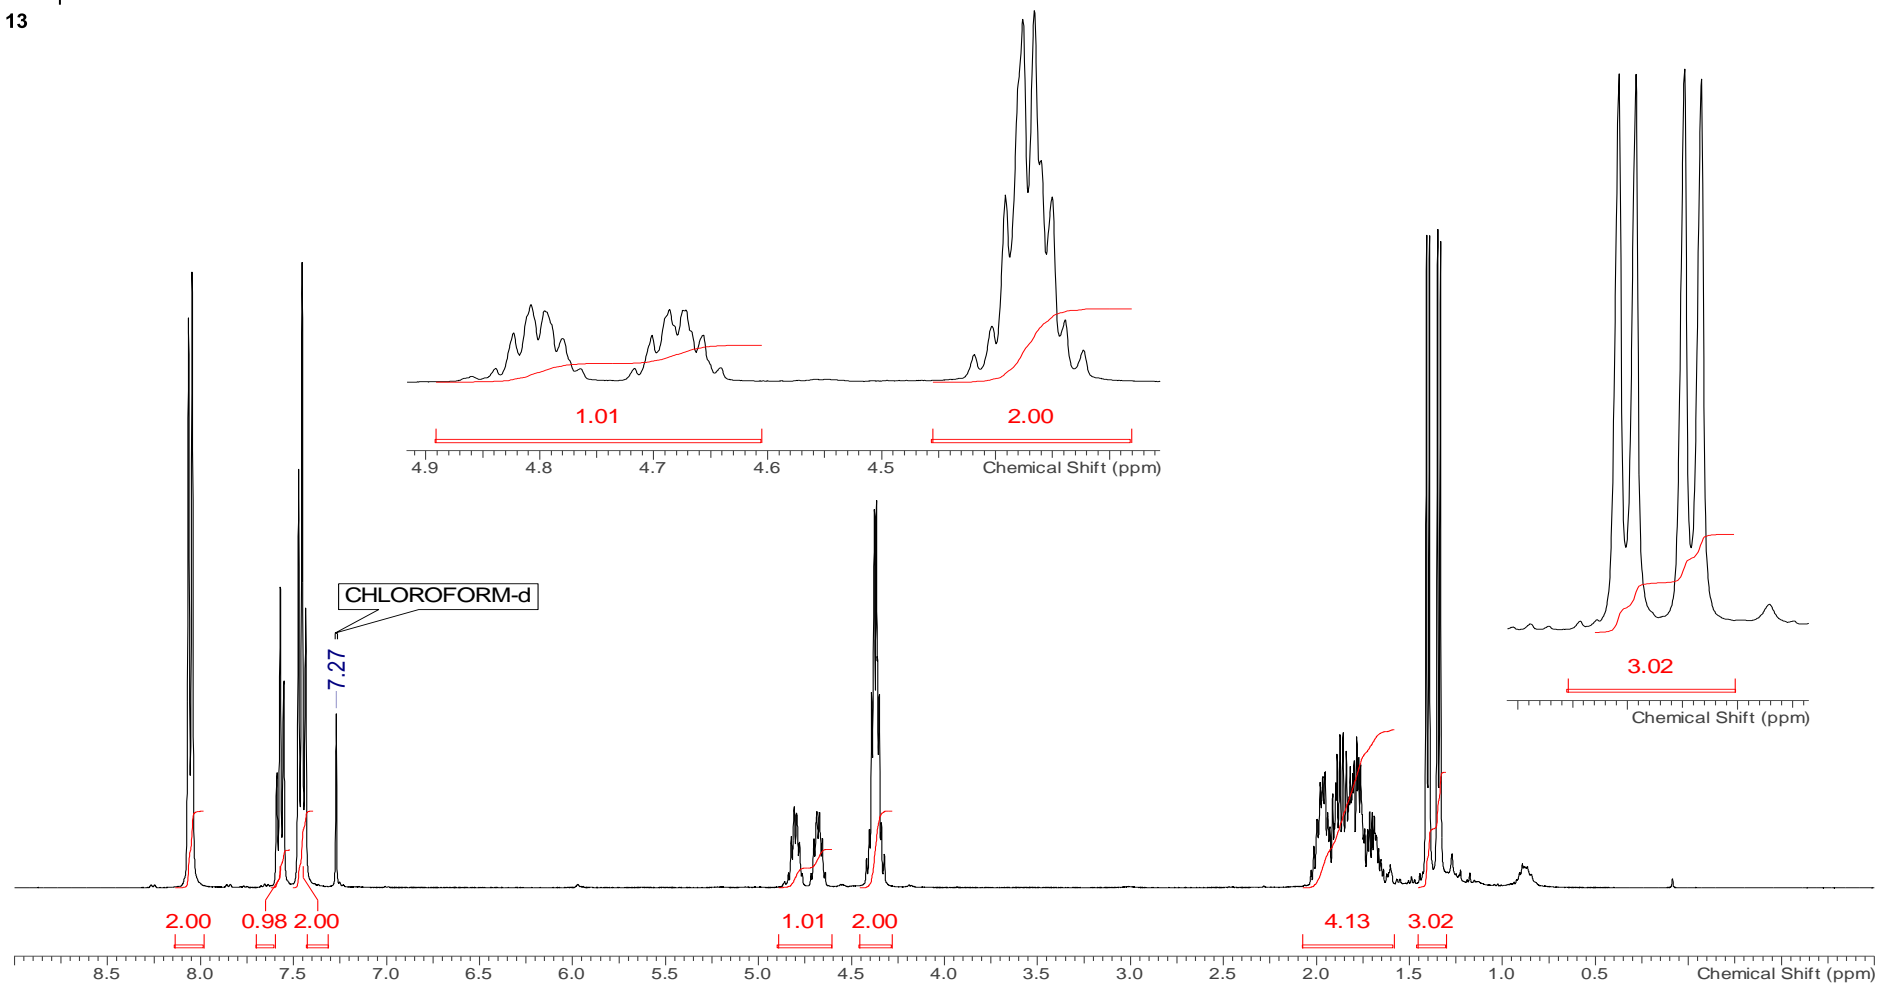

$^{13}\text{C}$  NMR,  $\text{CDCl}_3$ , 101 MHz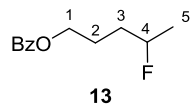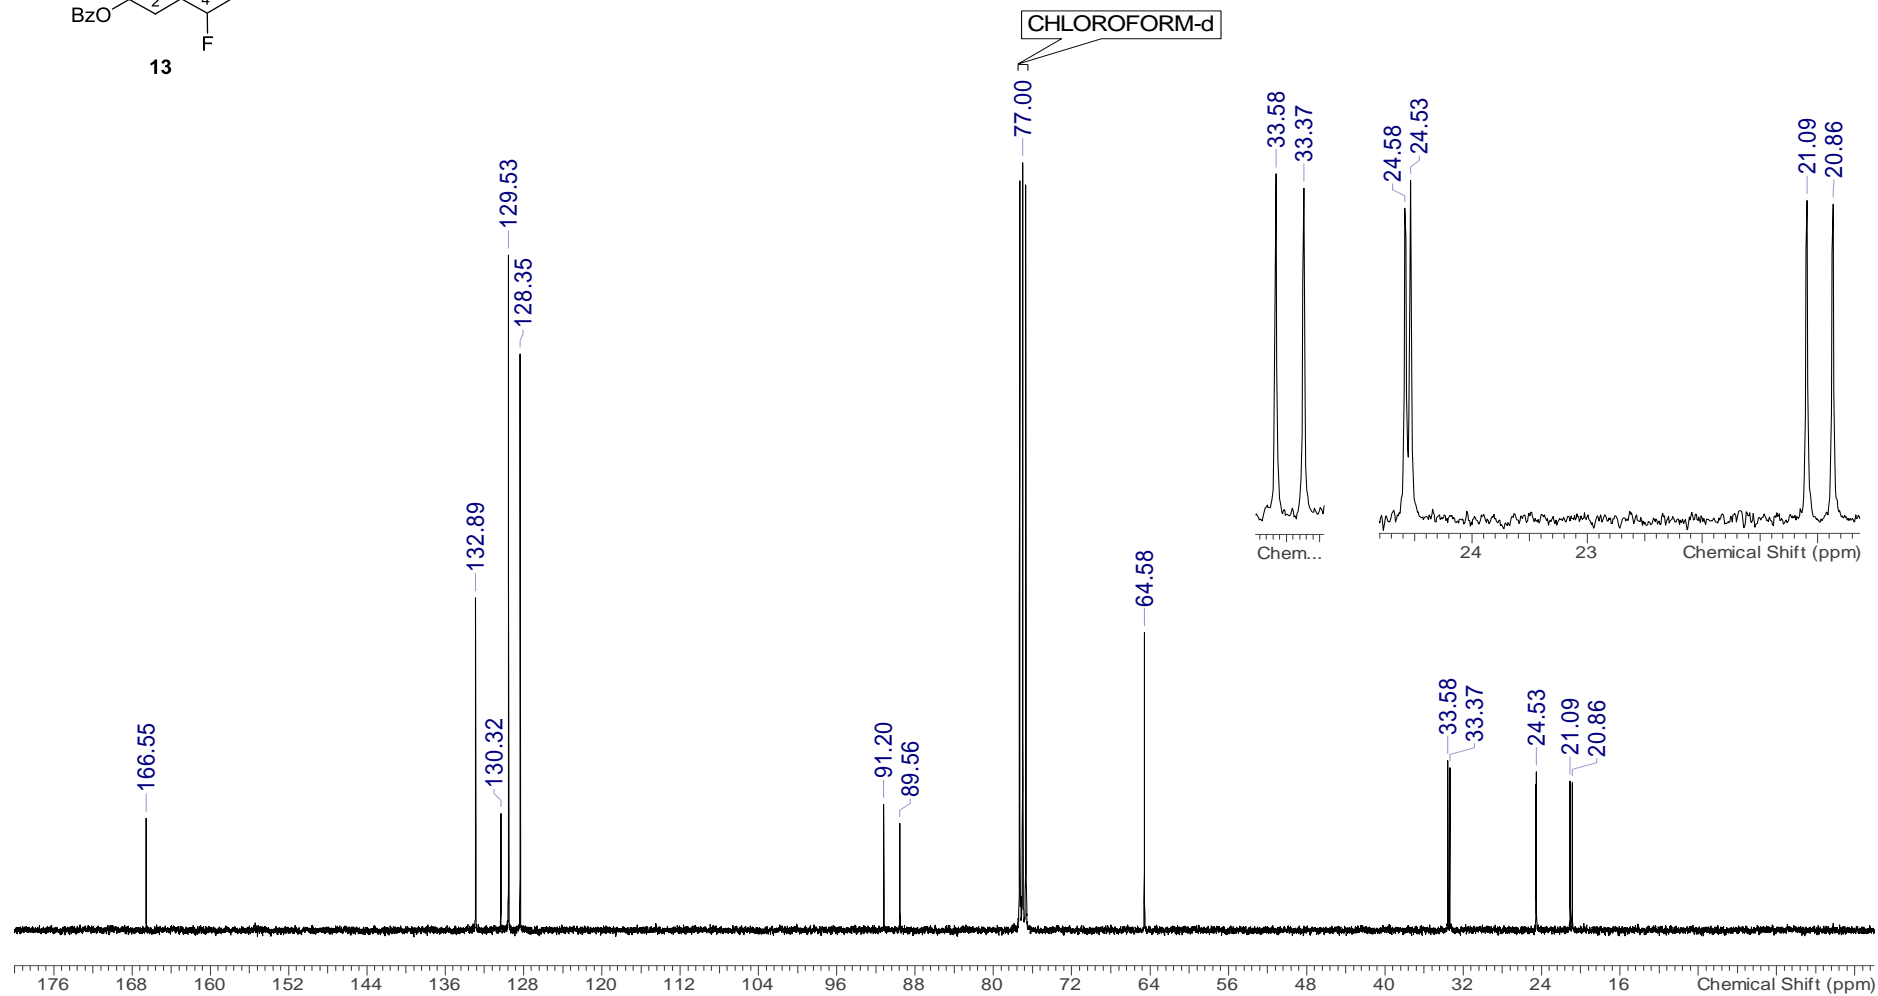

$^{19}\text{F}$  NMR,  $\text{CDCl}_3$ , 376 MHz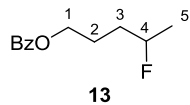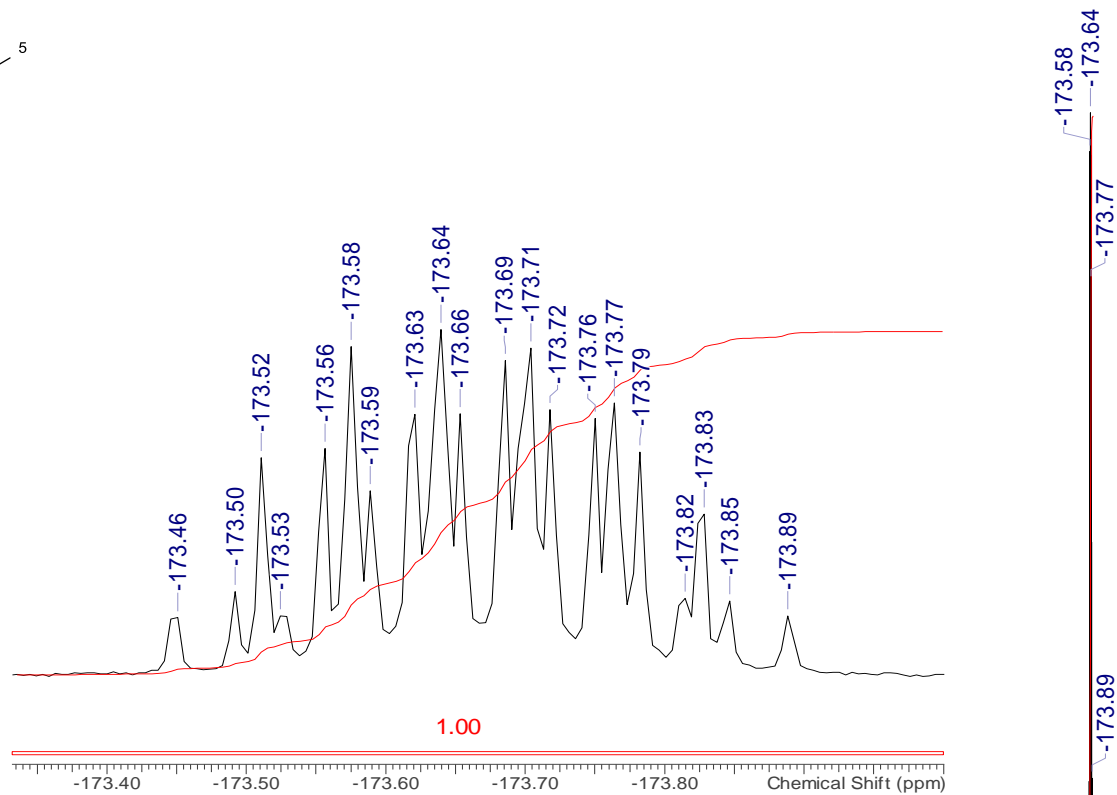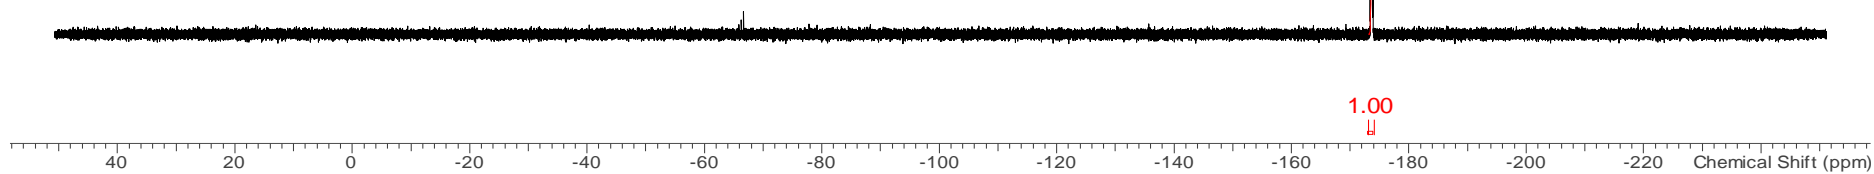

## 15.3.2. Synthesis of 4-fluoropentan-1-ol (31)

 $^1\text{H}$  NMR,  $\text{CDCl}_3$ , 400 MHz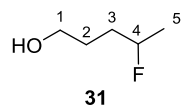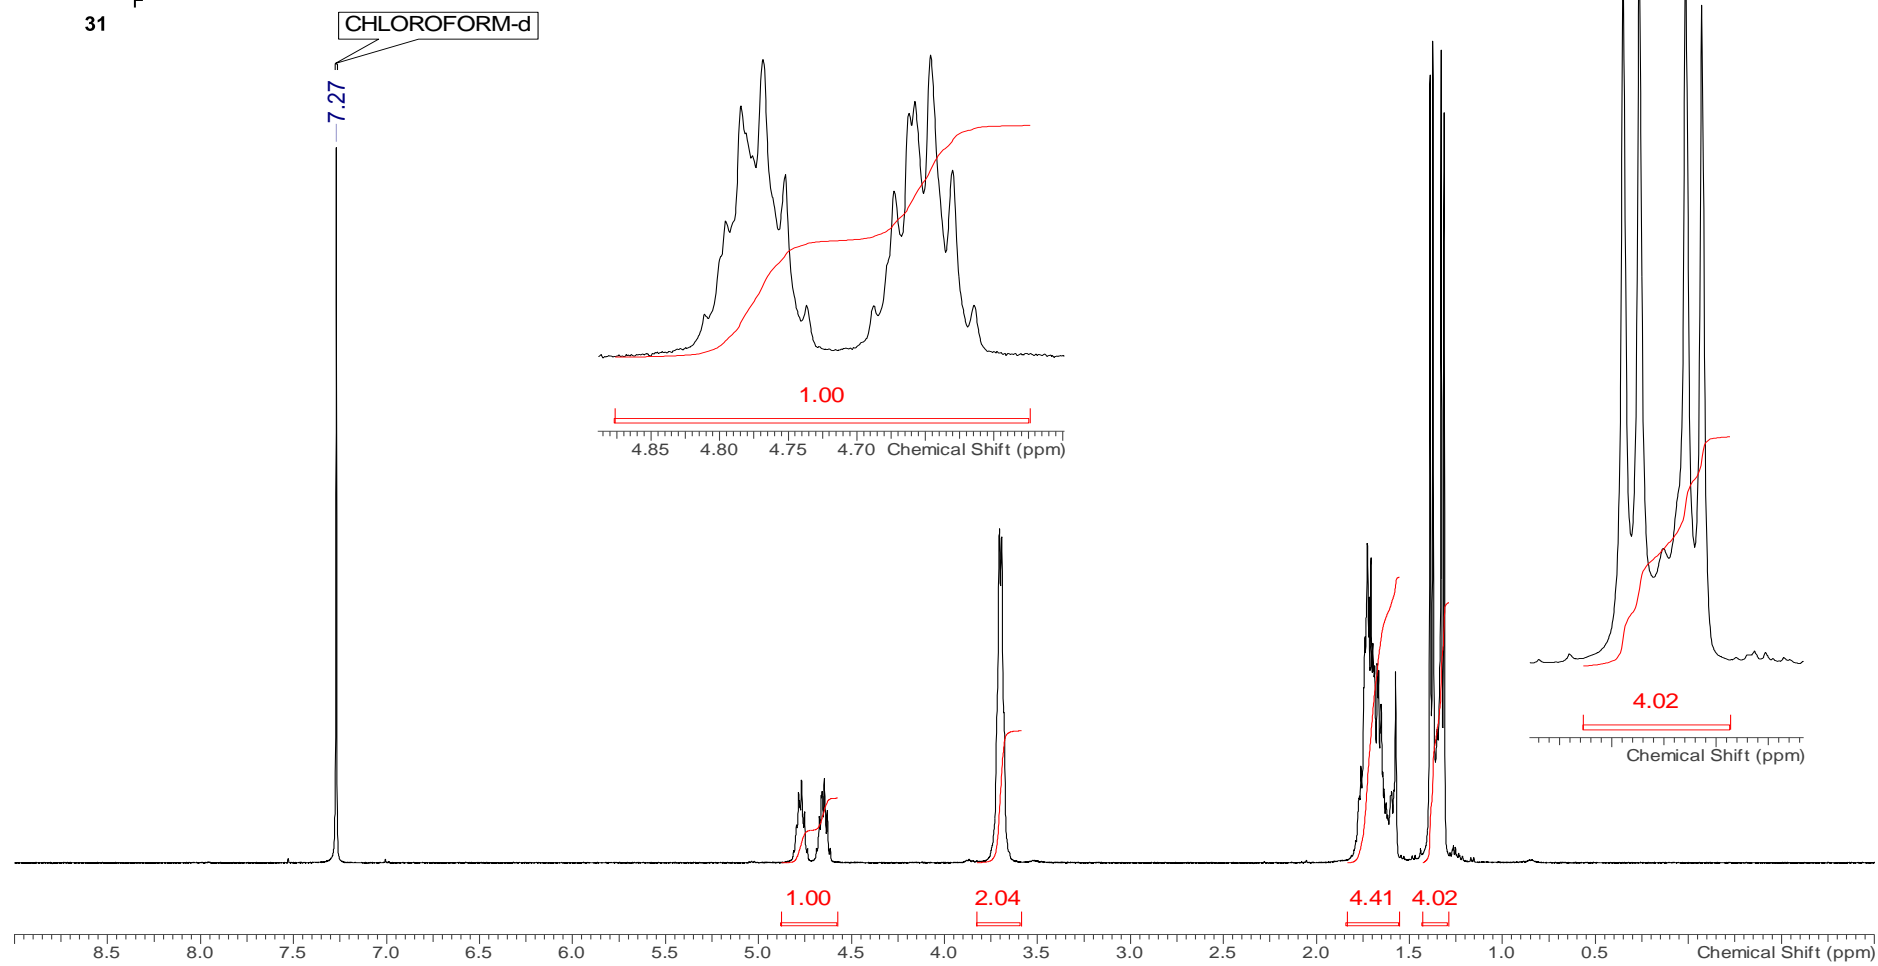

$^{13}\text{C}$  NMR,  $\text{CDCl}_3$ , 101 MHz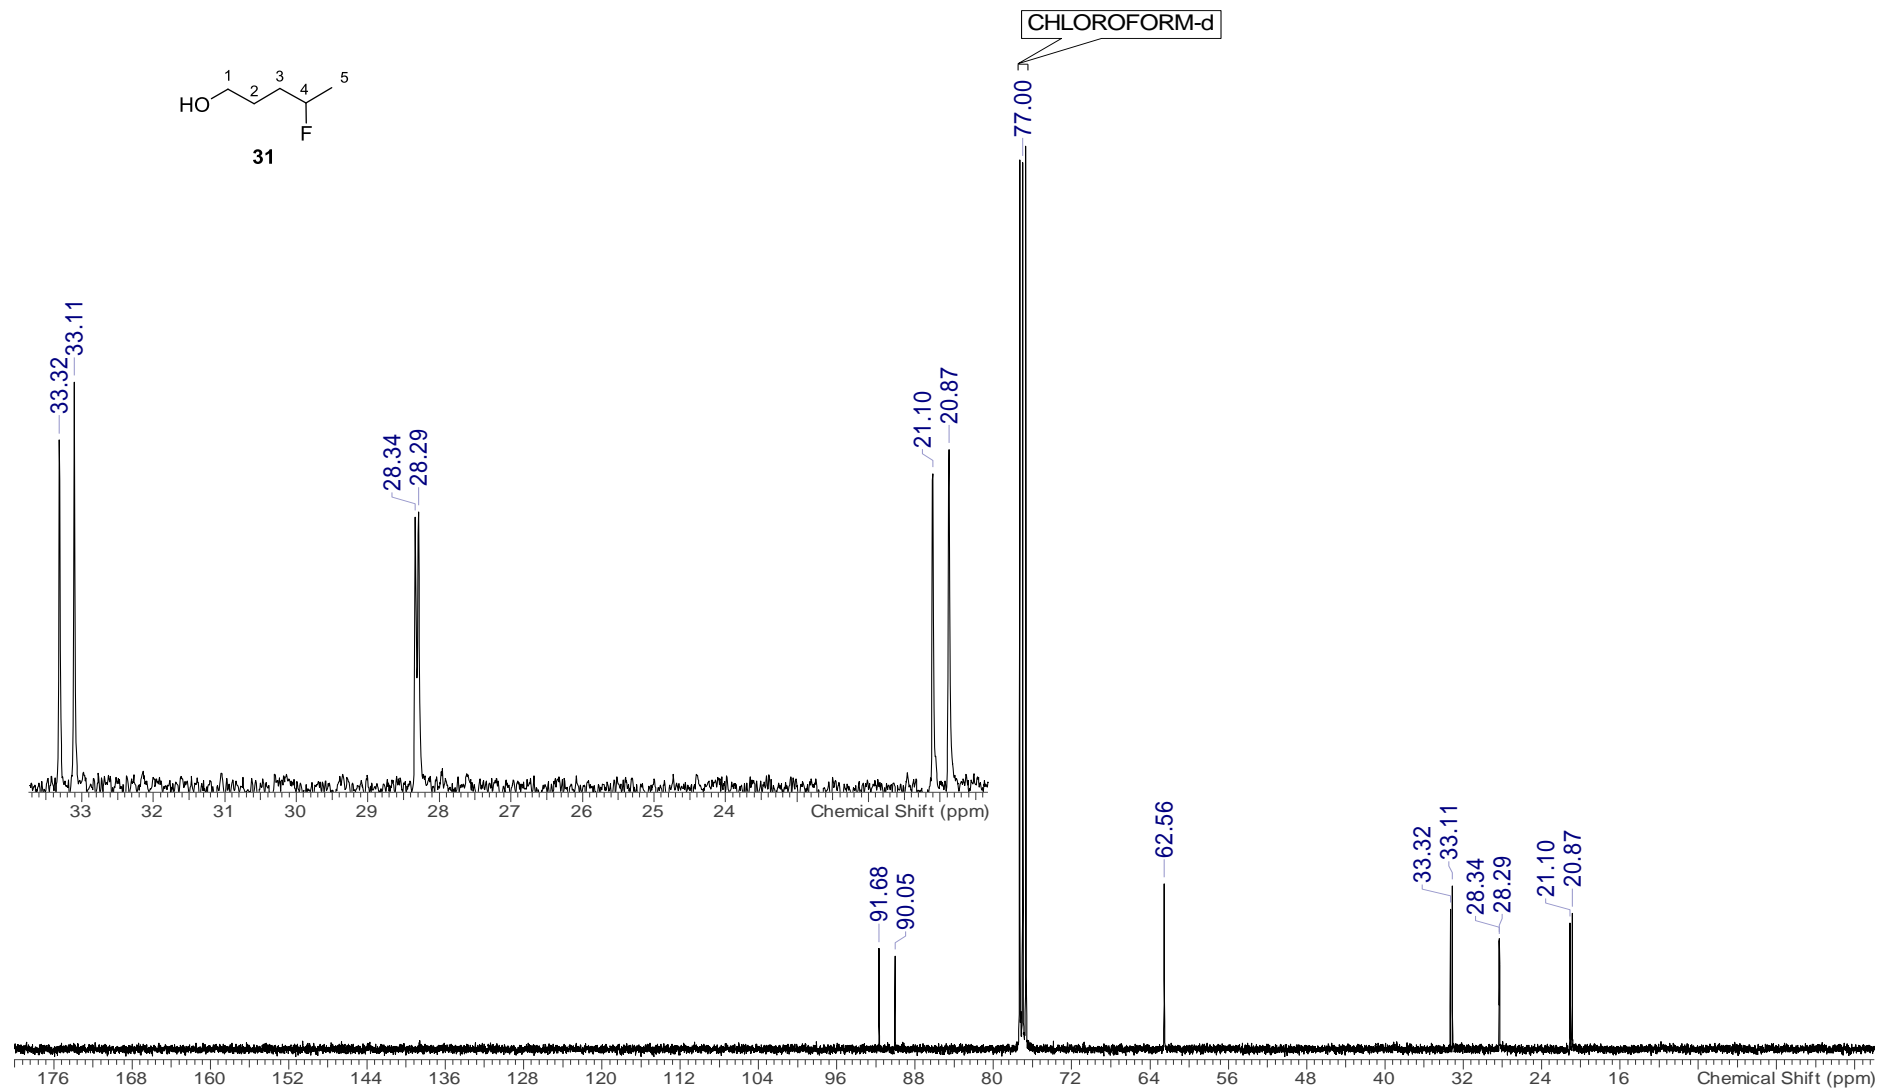



$^{19}\text{F}$  NMR,  $\text{CDCl}_3$ , 376 MHz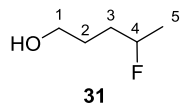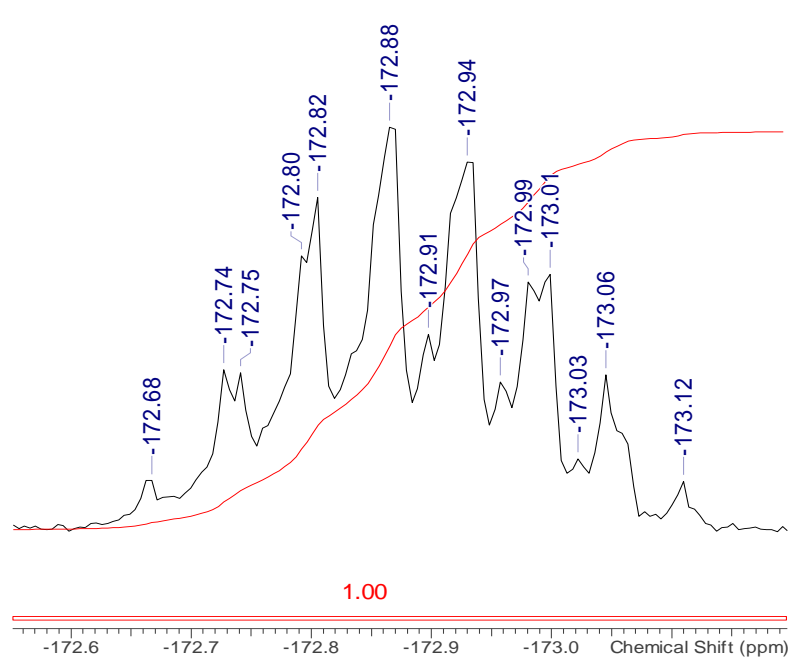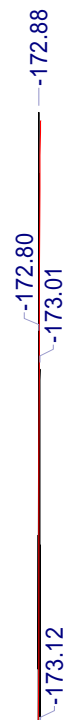

1.00

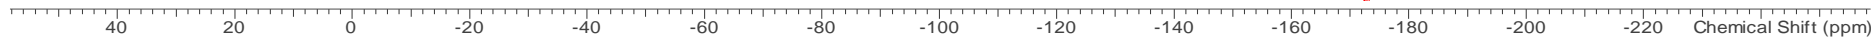

**15.4. Synthesis of 4,4-difluoropentan-1-ol (32)****15.4.1. Synthesis of 4,4-difluoropentyl benzoate (SI14)**<sup>1</sup>H NMR, CDCl<sub>3</sub>, 400 MHz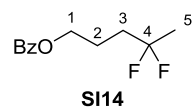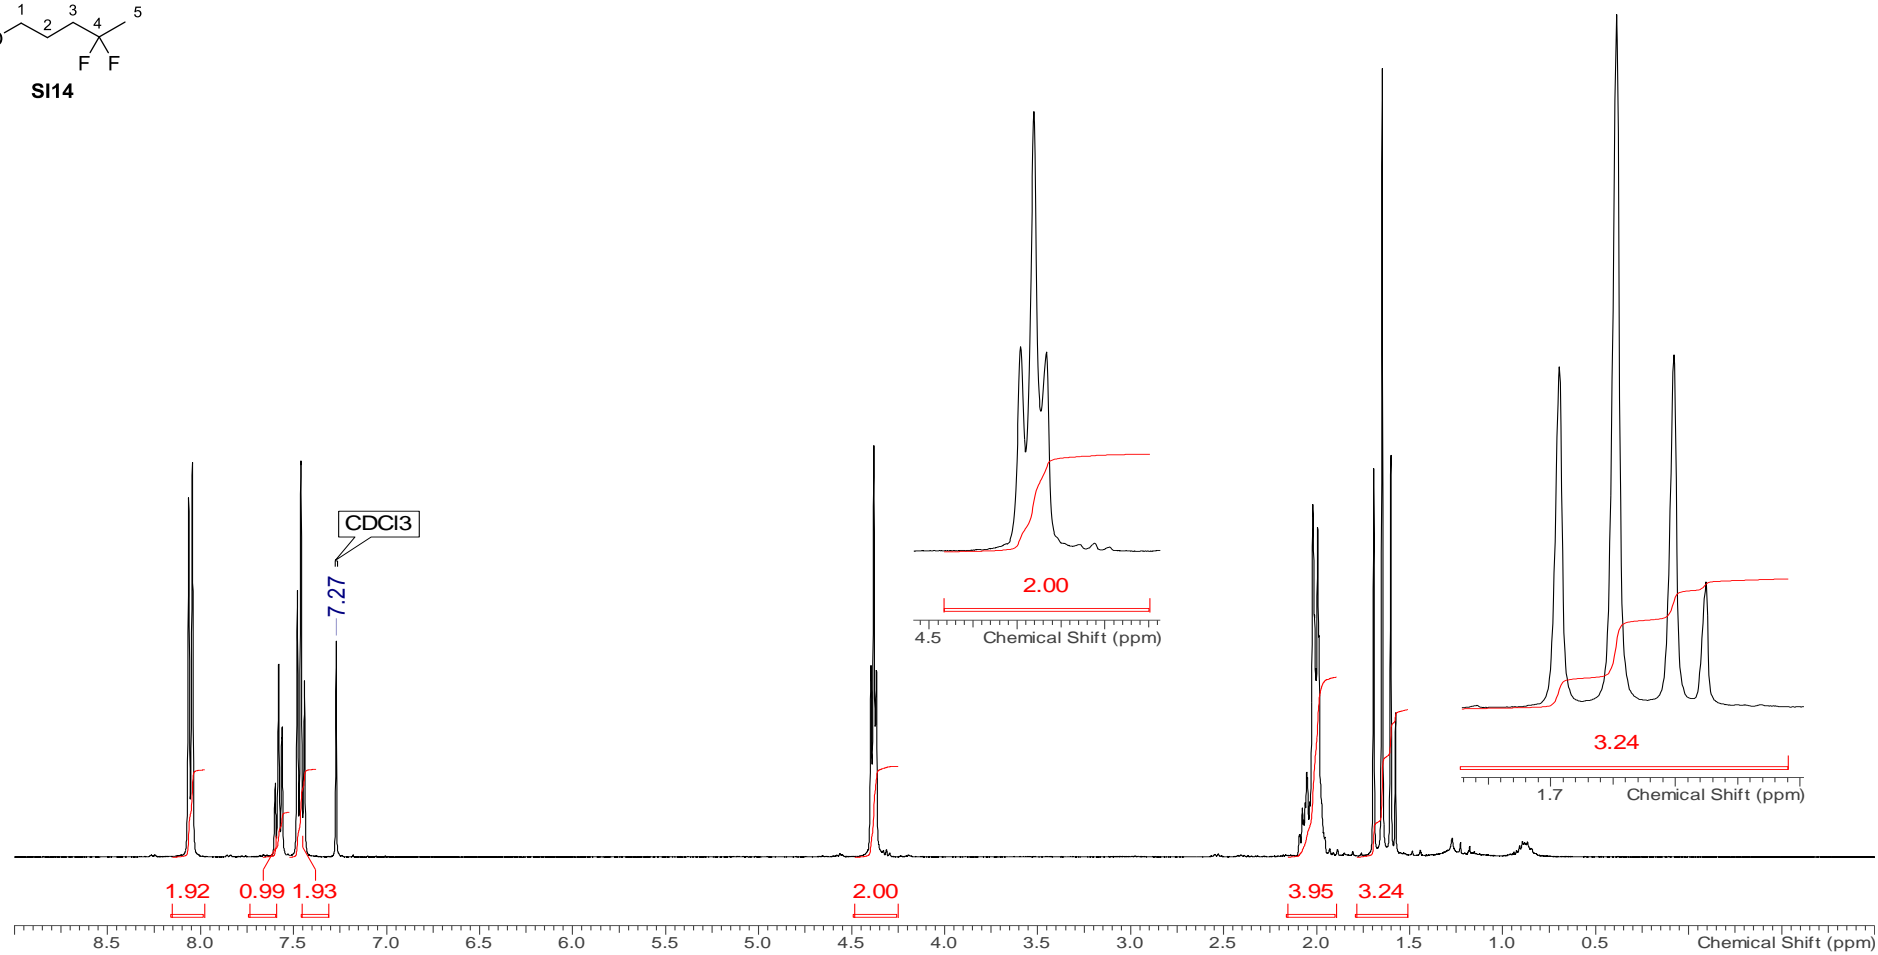

$^{13}\text{C}$  NMR,  $\text{CDCl}_3$ , 101 MHz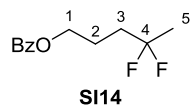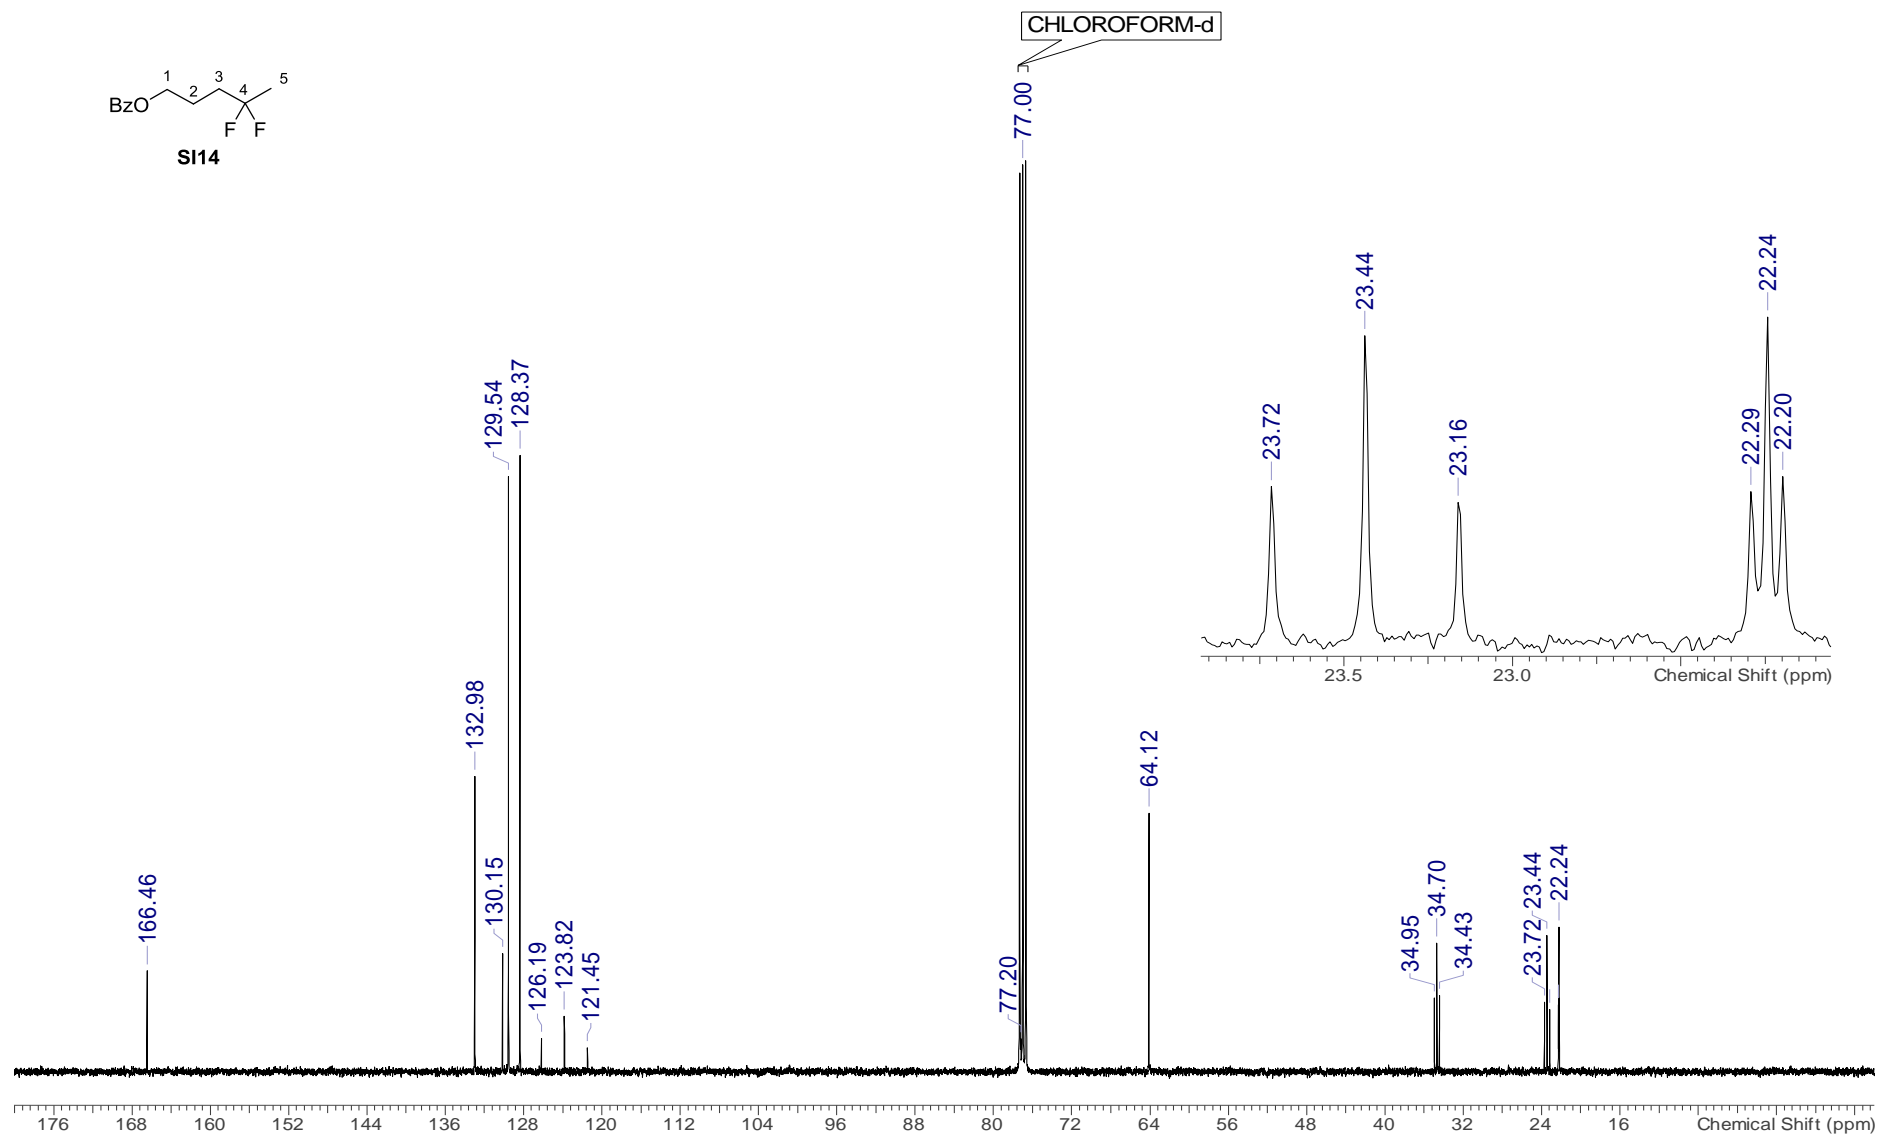

$^{19}\text{F}$  NMR,  $\text{CDCl}_3$ , 376 MHz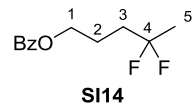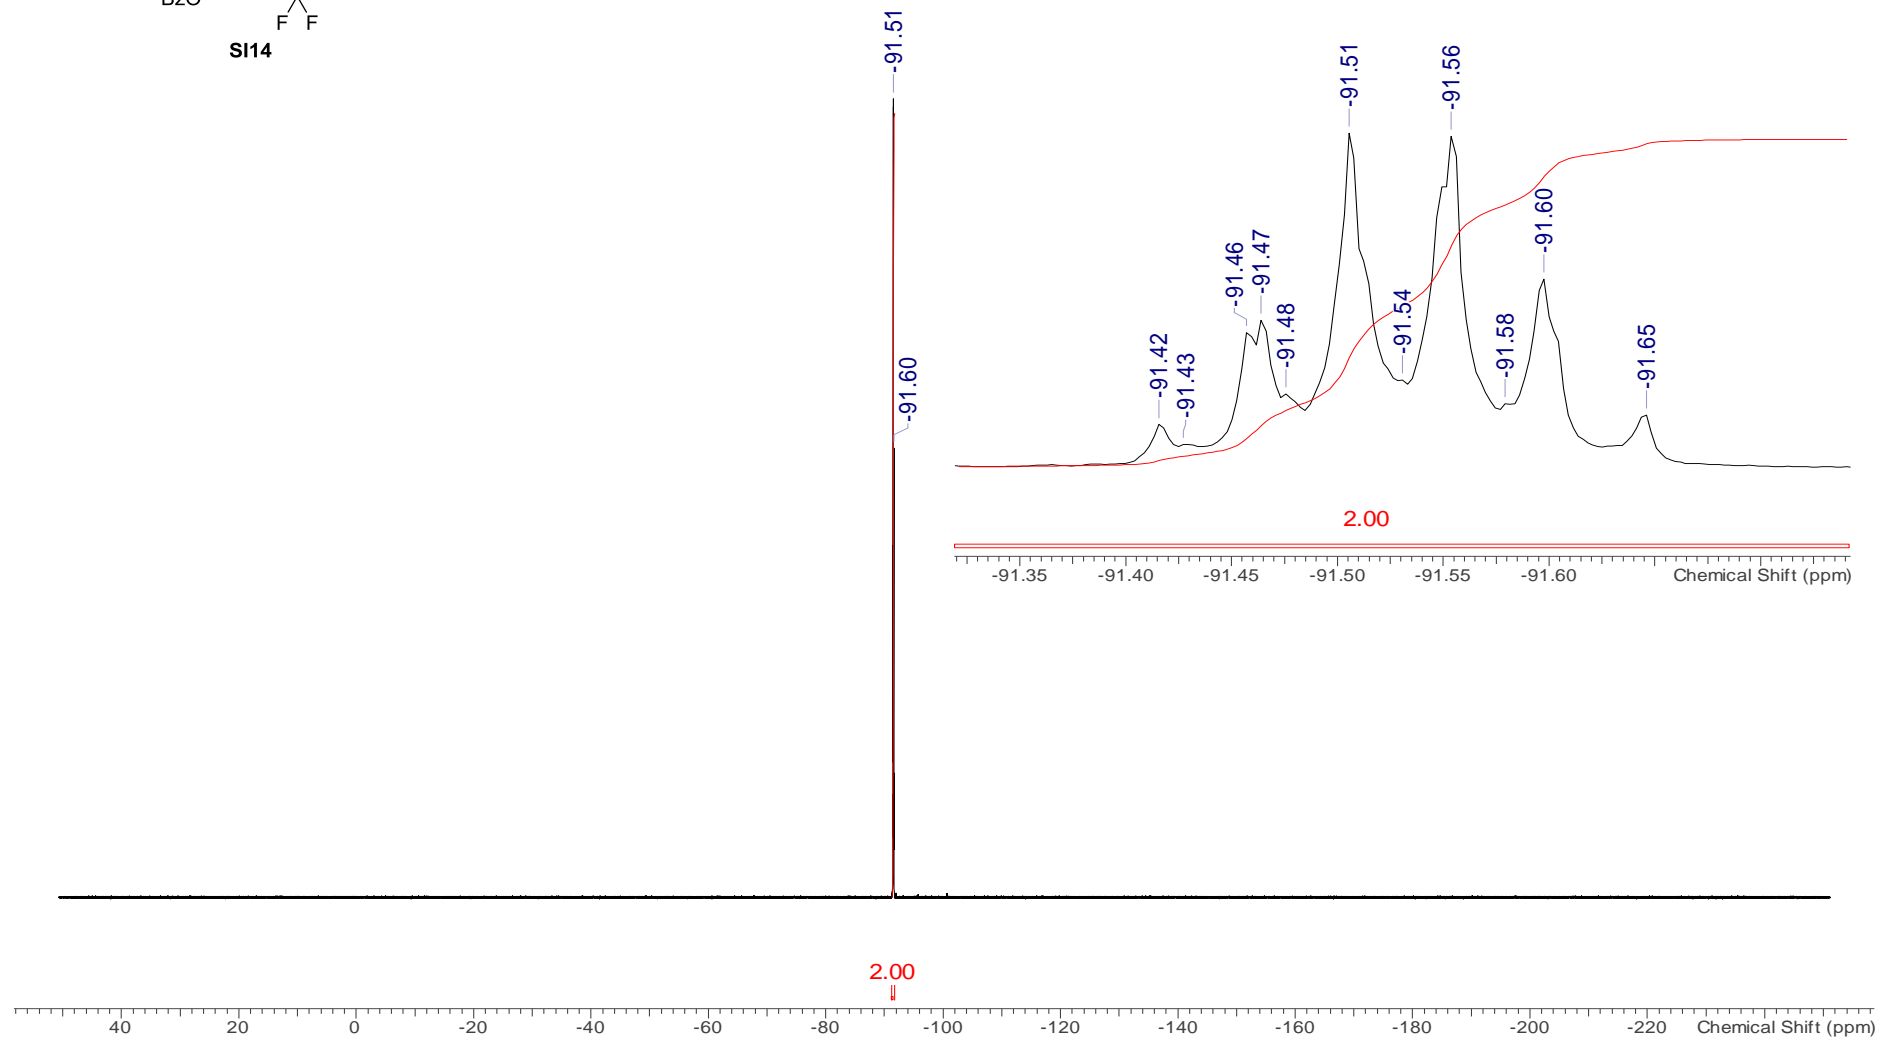

## 15.4.2. Synthesis of 4,4-difluoropentan-1-ol (32)

 $^1\text{H}$  NMR,  $\text{CDCl}_3$ , 400 MHz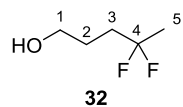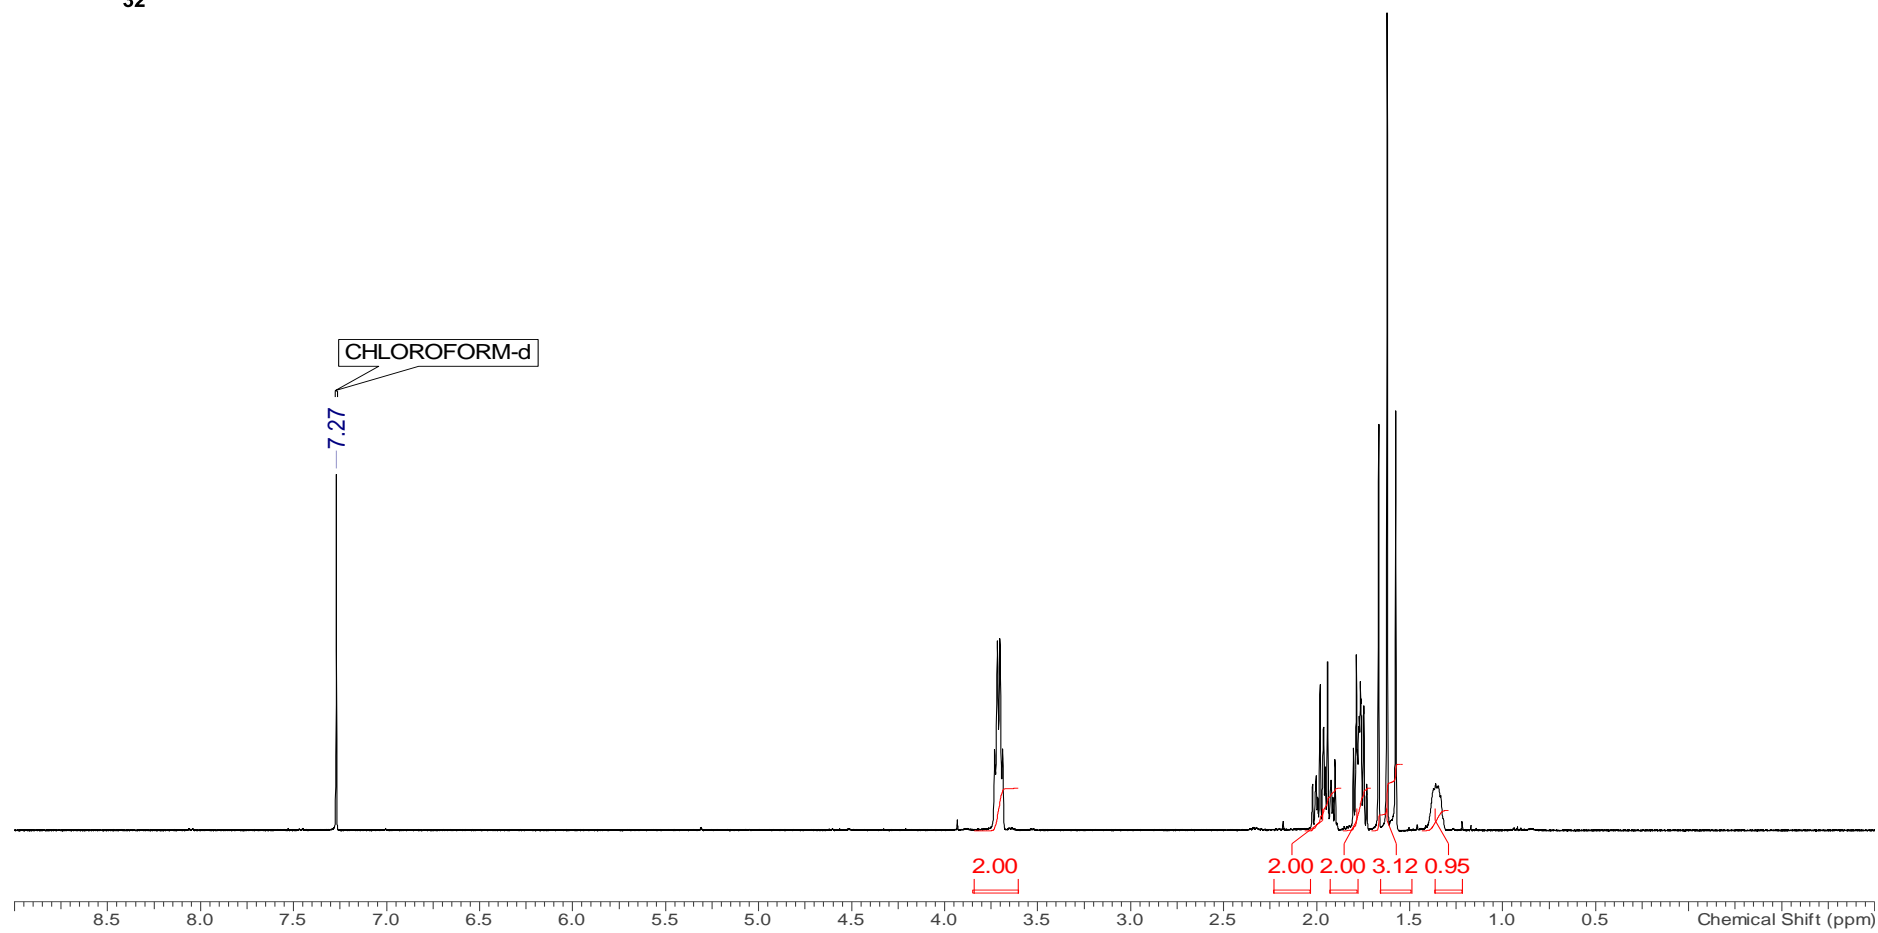

$^{13}\text{C}$  NMR,  $\text{CDCl}_3$ , 101 MHz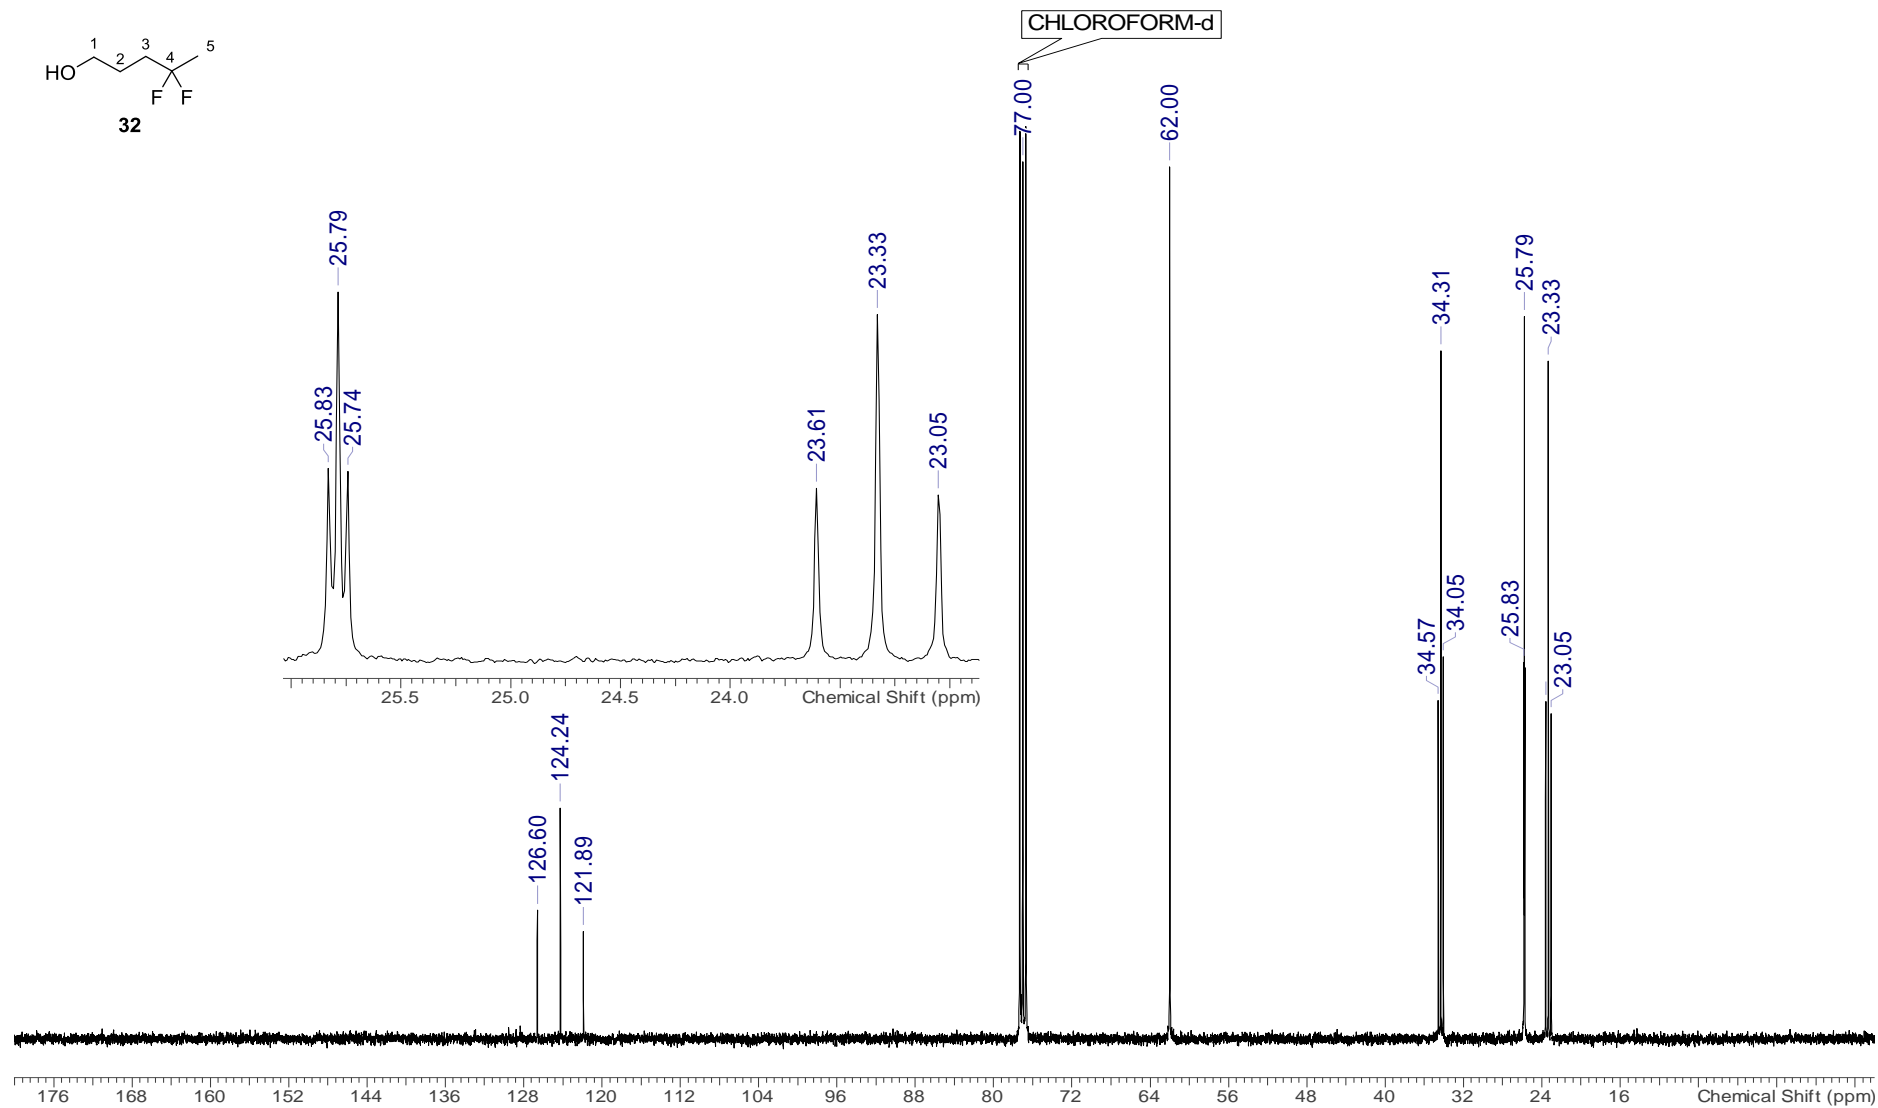

$^{19}\text{F}$  NMR,  $\text{CDCl}_3$ , 376 MHz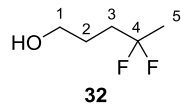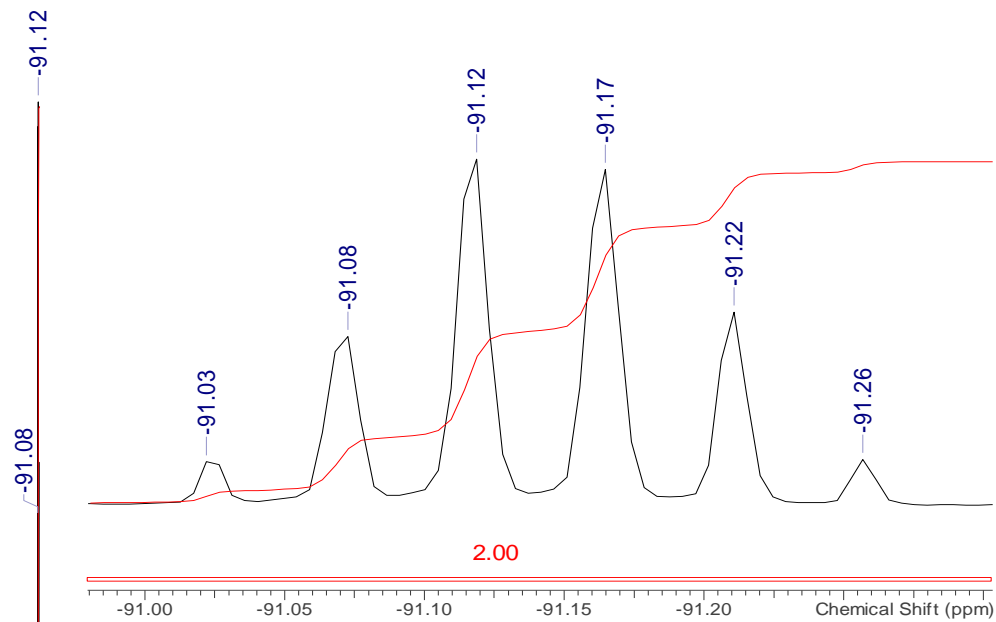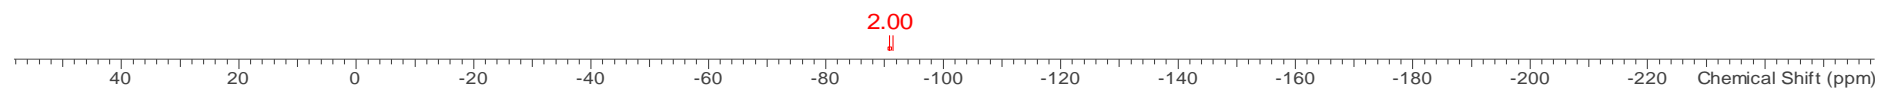

## 15.5. Synthesis of 2-fluoropentyl tosylate (SI16)

 $^1\text{H}$  NMR,  $\text{CDCl}_3$ , 400 MHz

jy2914zw1.010.esp

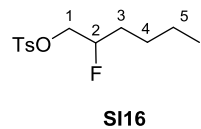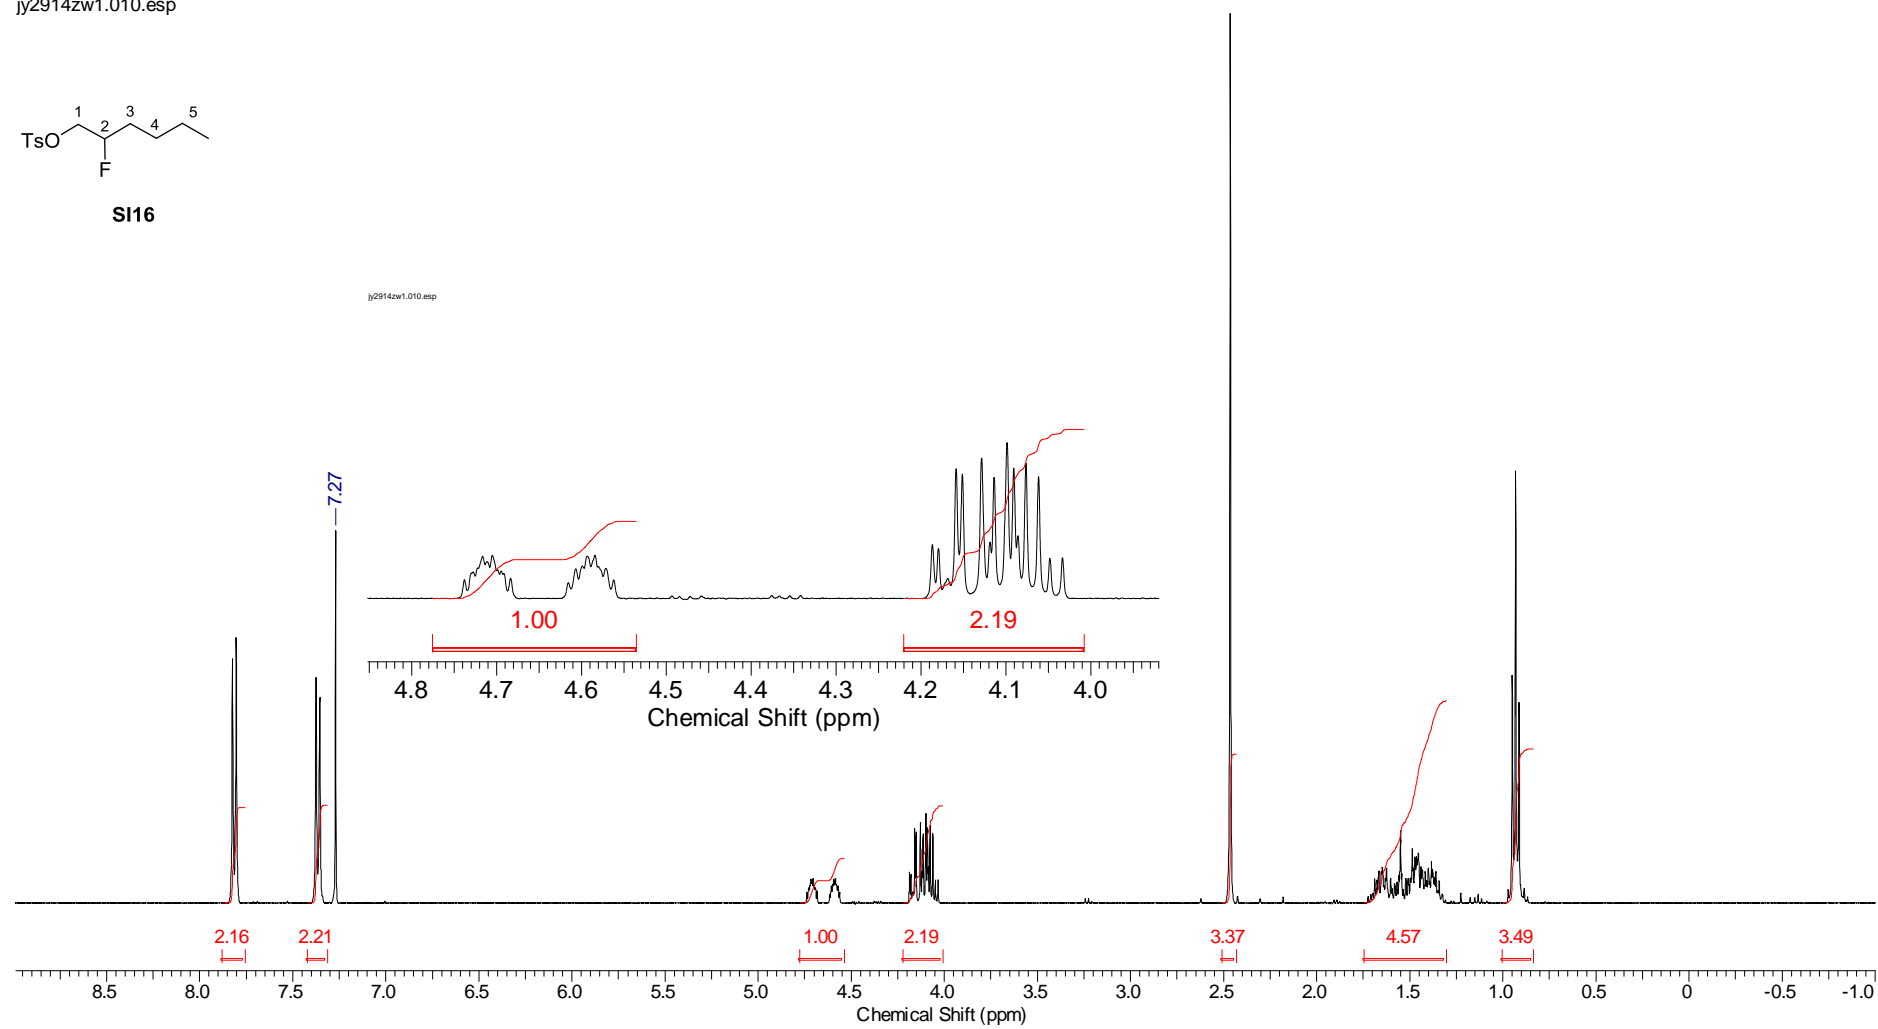



$^{13}\text{C}$  NMR,  $\text{CDCl}_3$ , 101 MHz

au0714zw3.011.esp

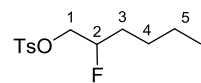

SI16

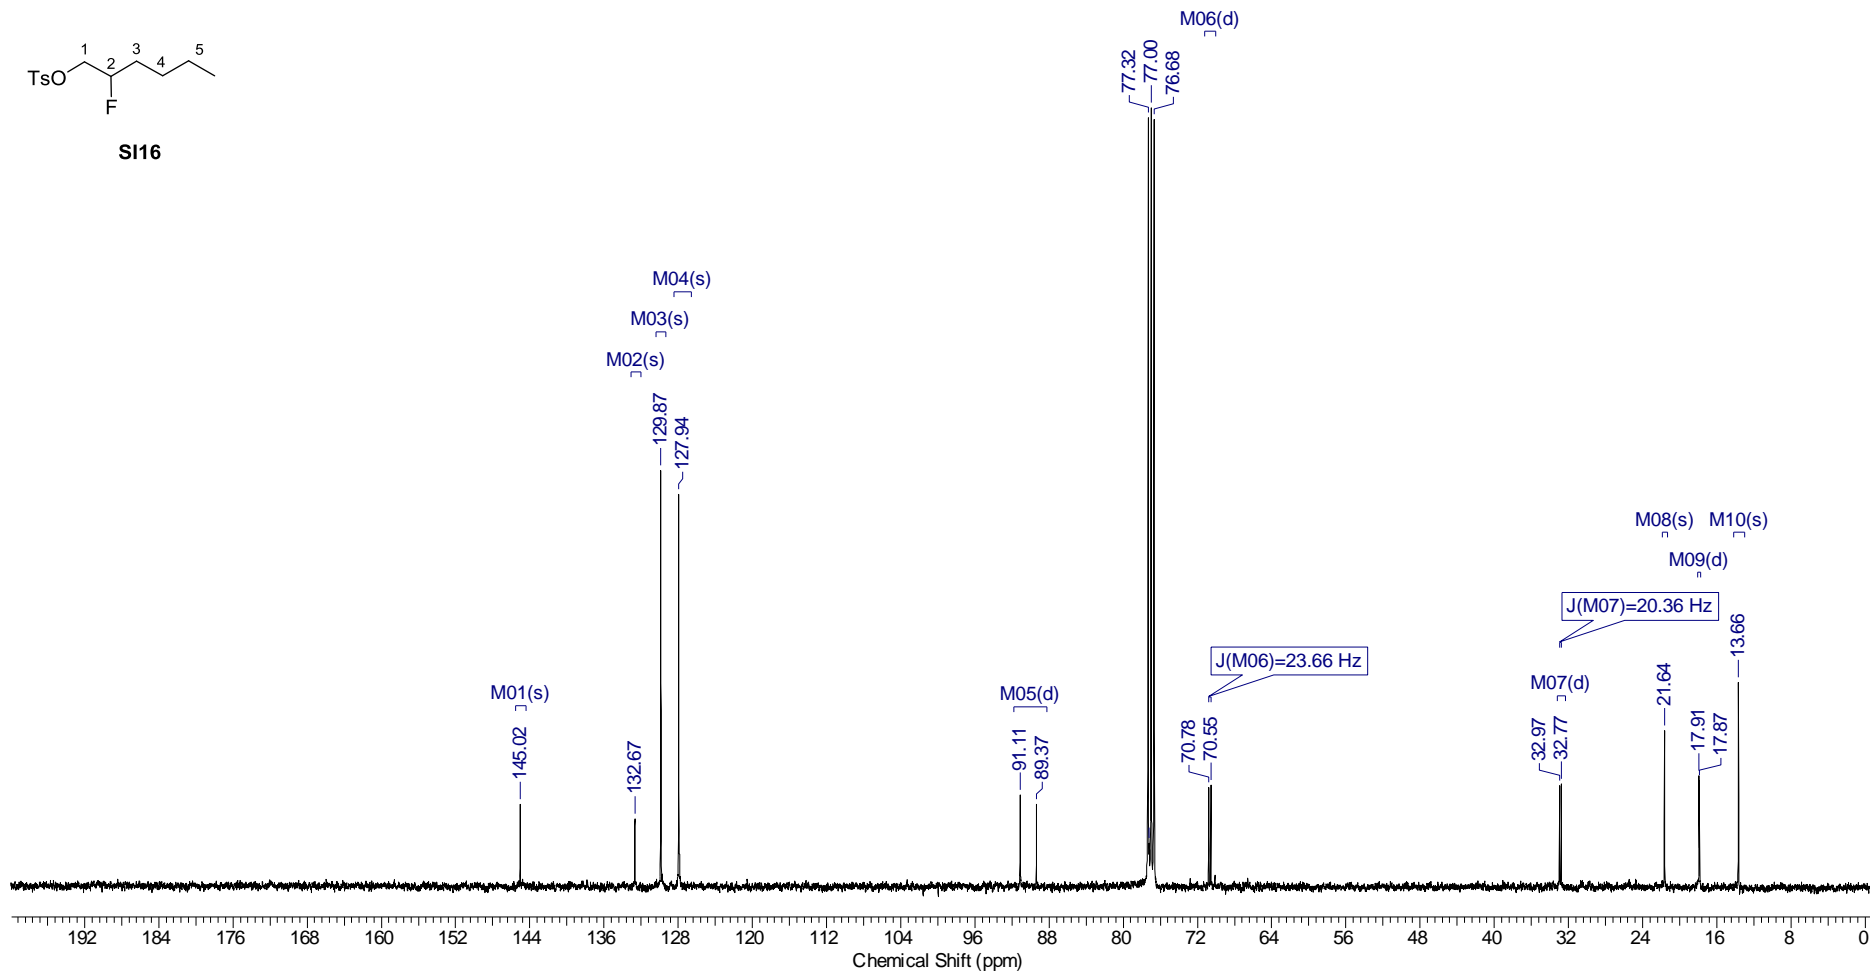

$^{19}\text{F}$  NMR,  $\text{CDCl}_3$ , 376 MHz

jy2914zw1.011.esp

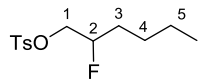

SI16

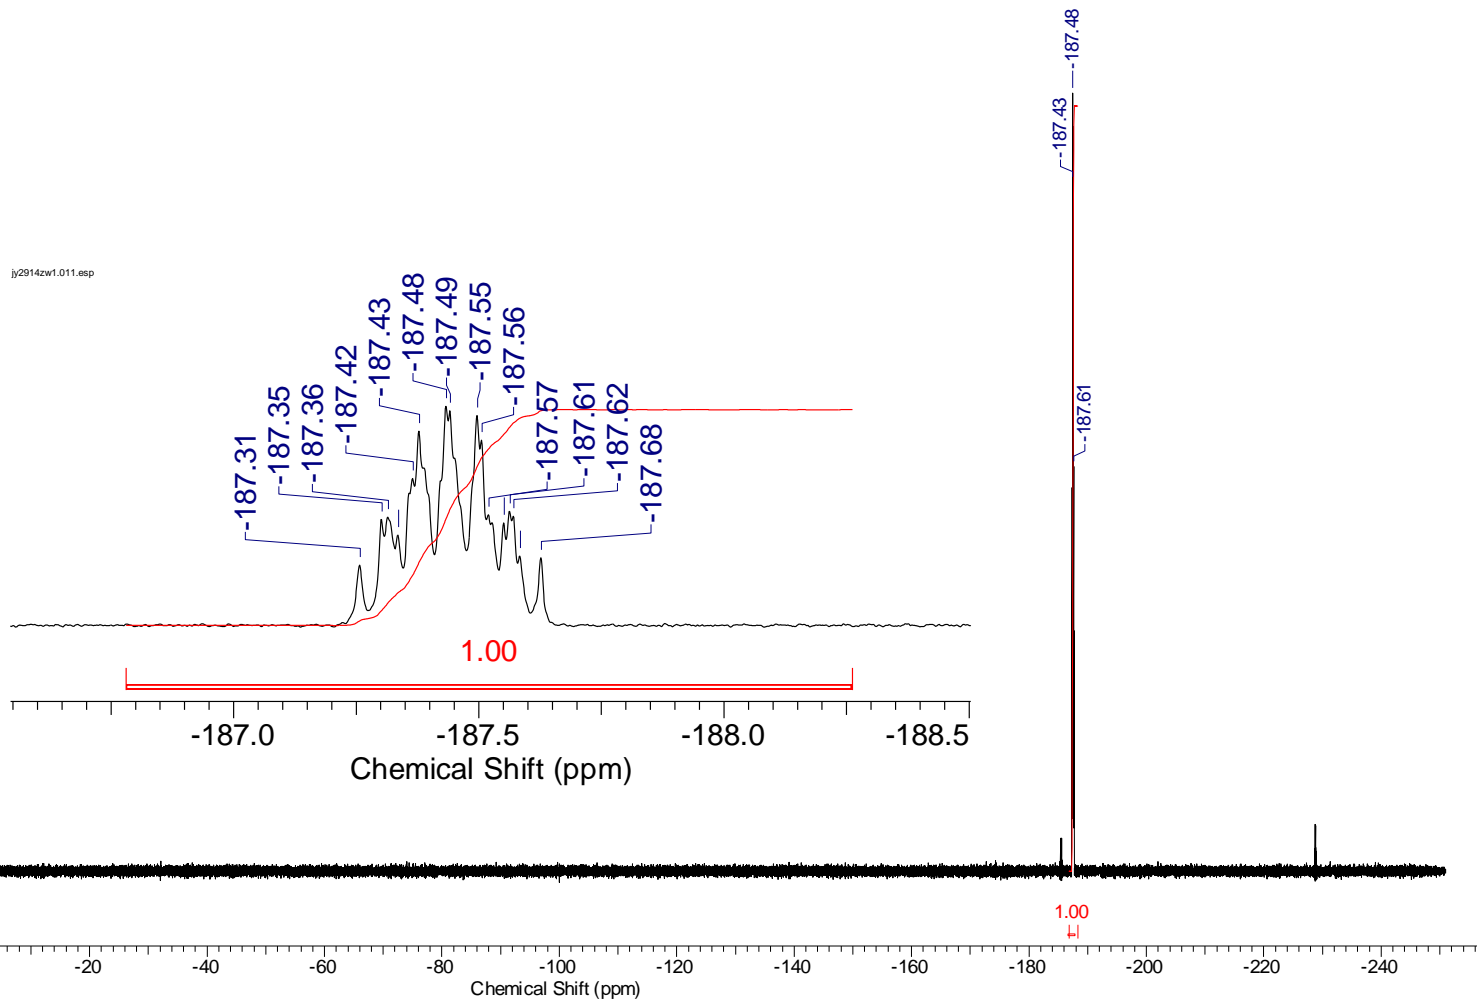

## 15.6. Synthesis of 4,4,5,5-tetrafluoropentan-1-ol (34)

 $^1\text{H}$  NMR,  $\text{CDCl}_3$ , 400 MHz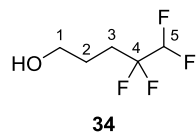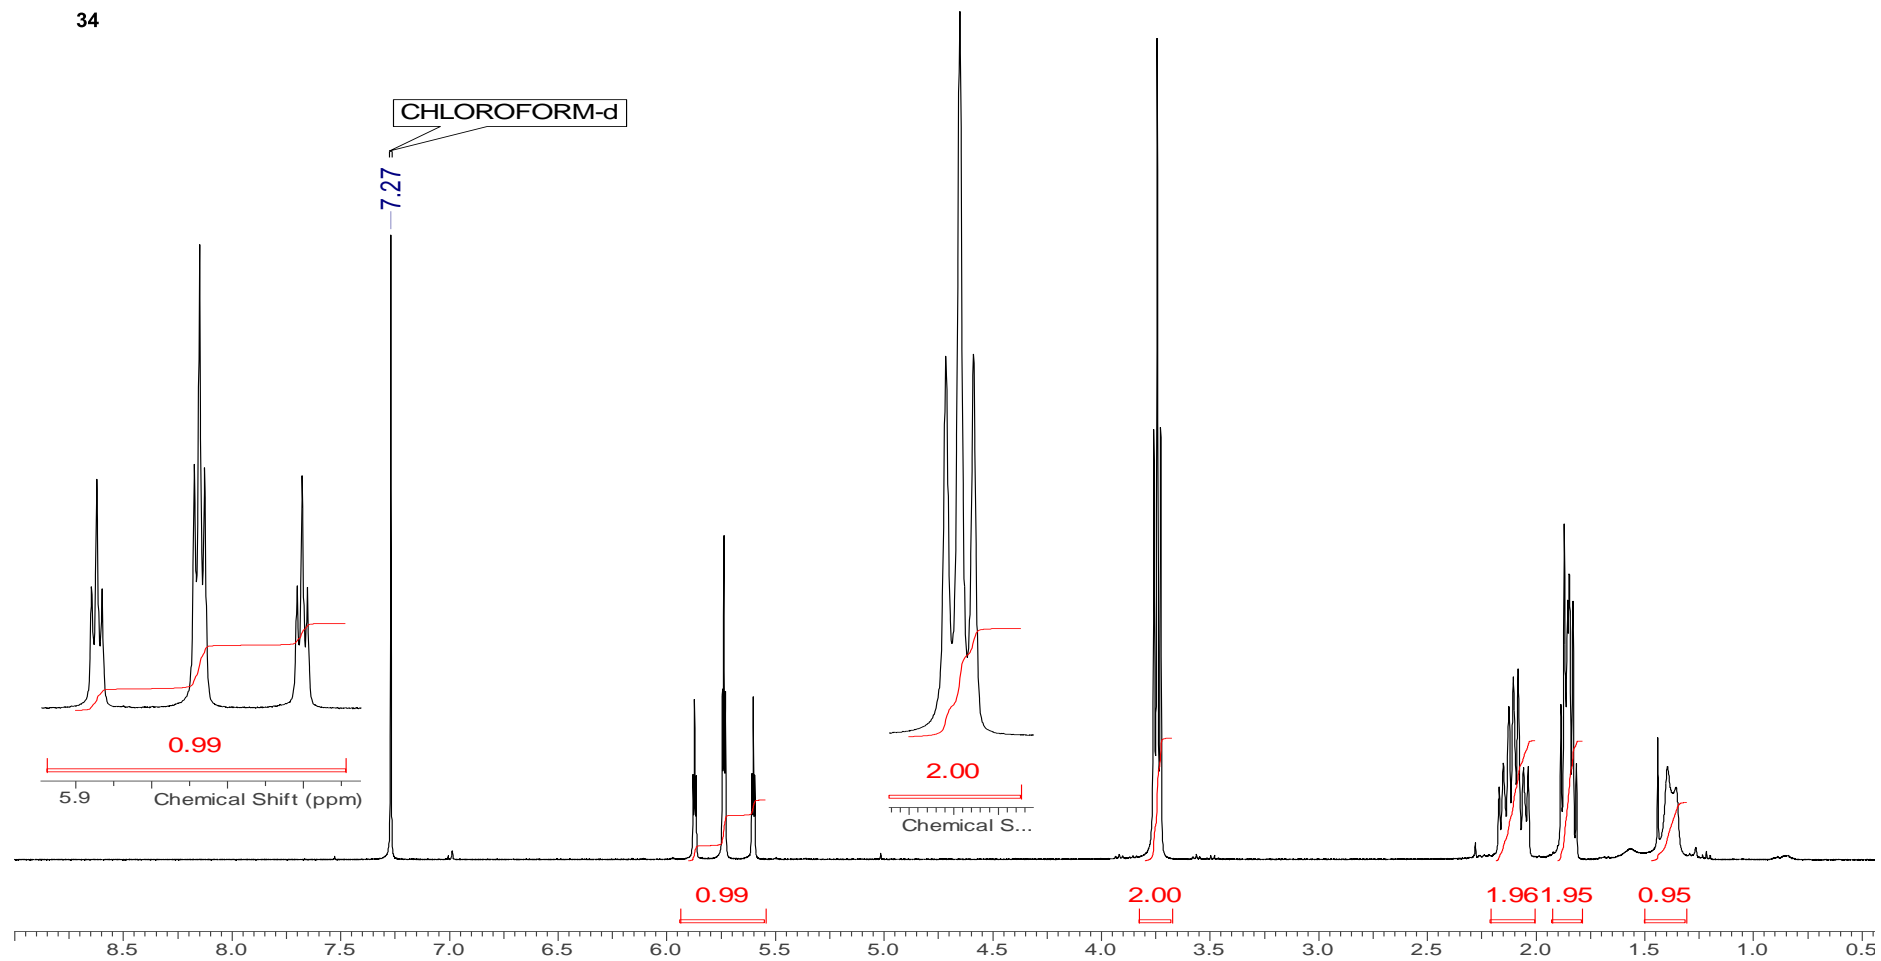

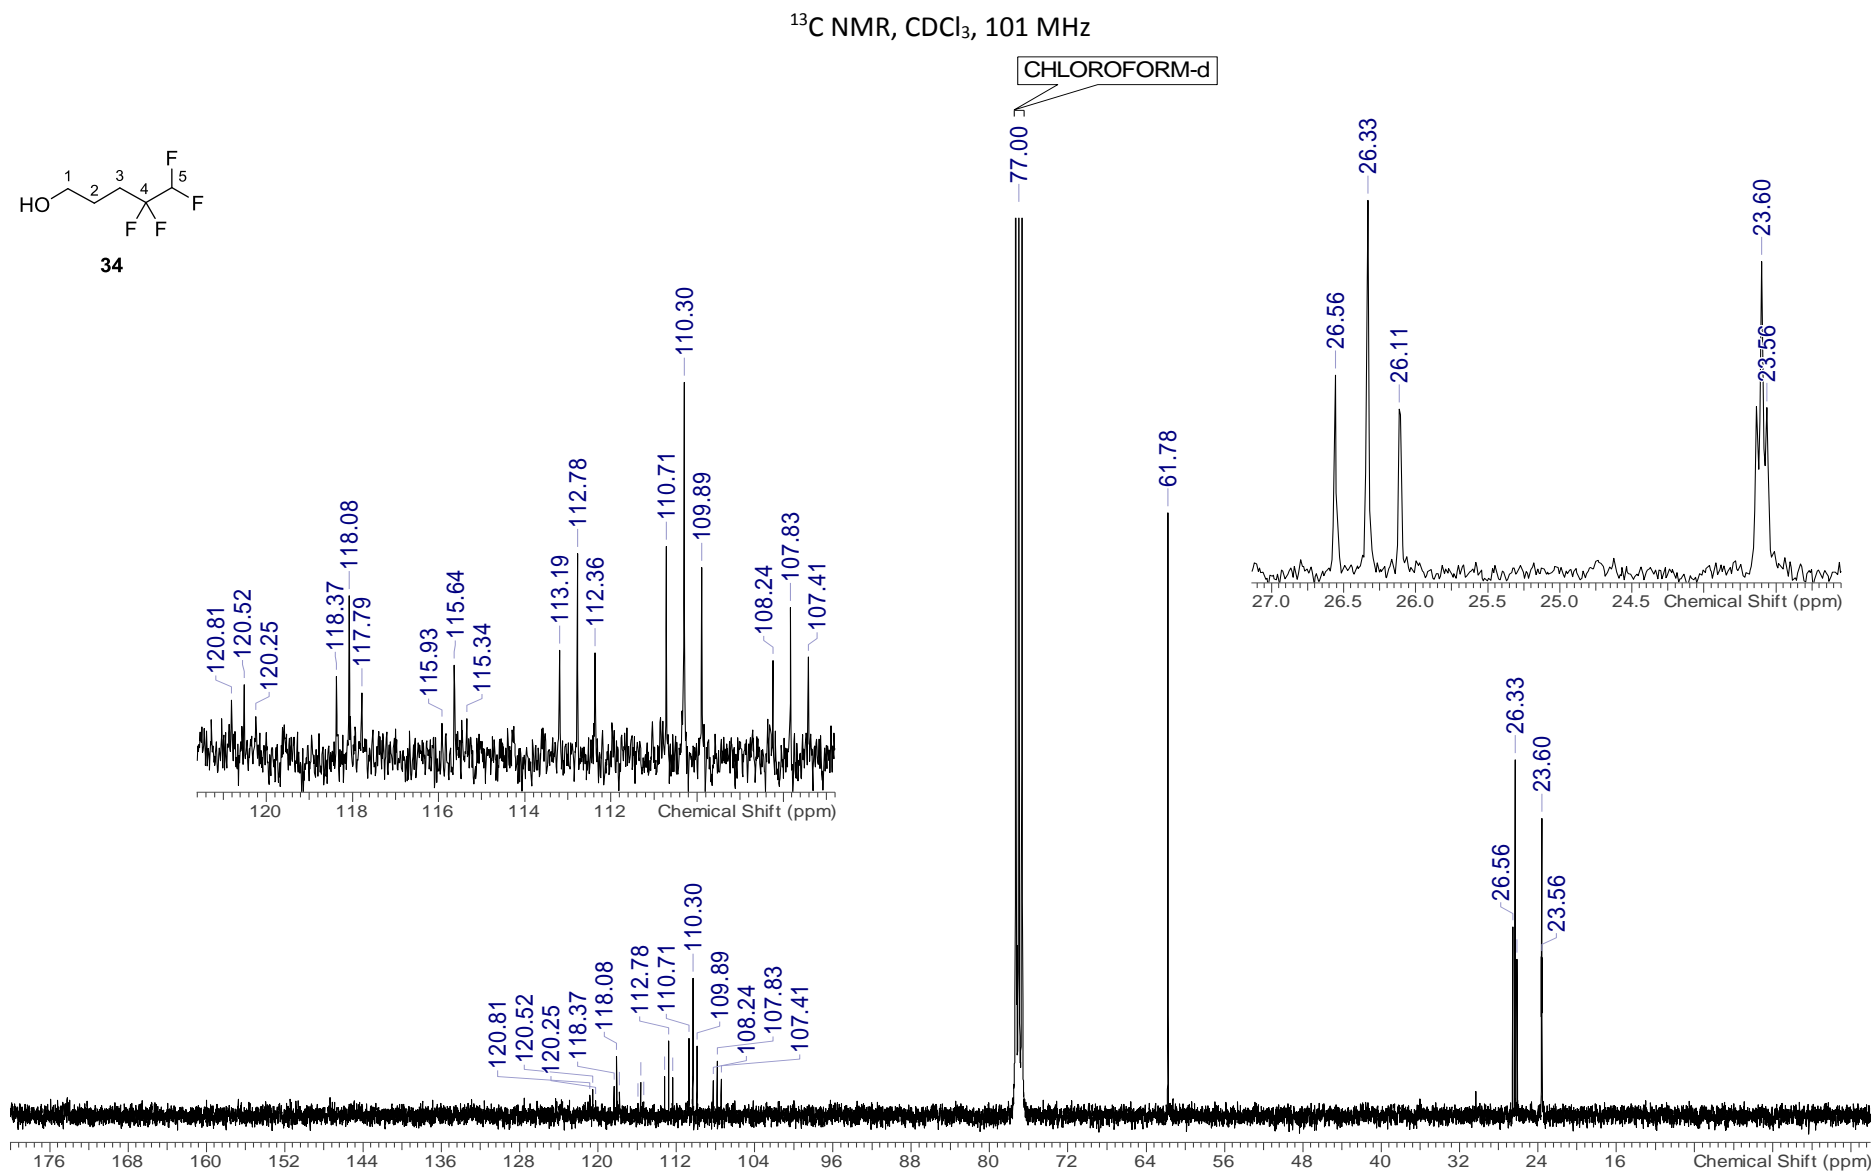

$^{19}\text{F}$  NMR,  $\text{CDCl}_3$ , 376 MHz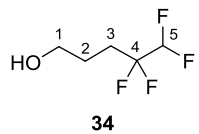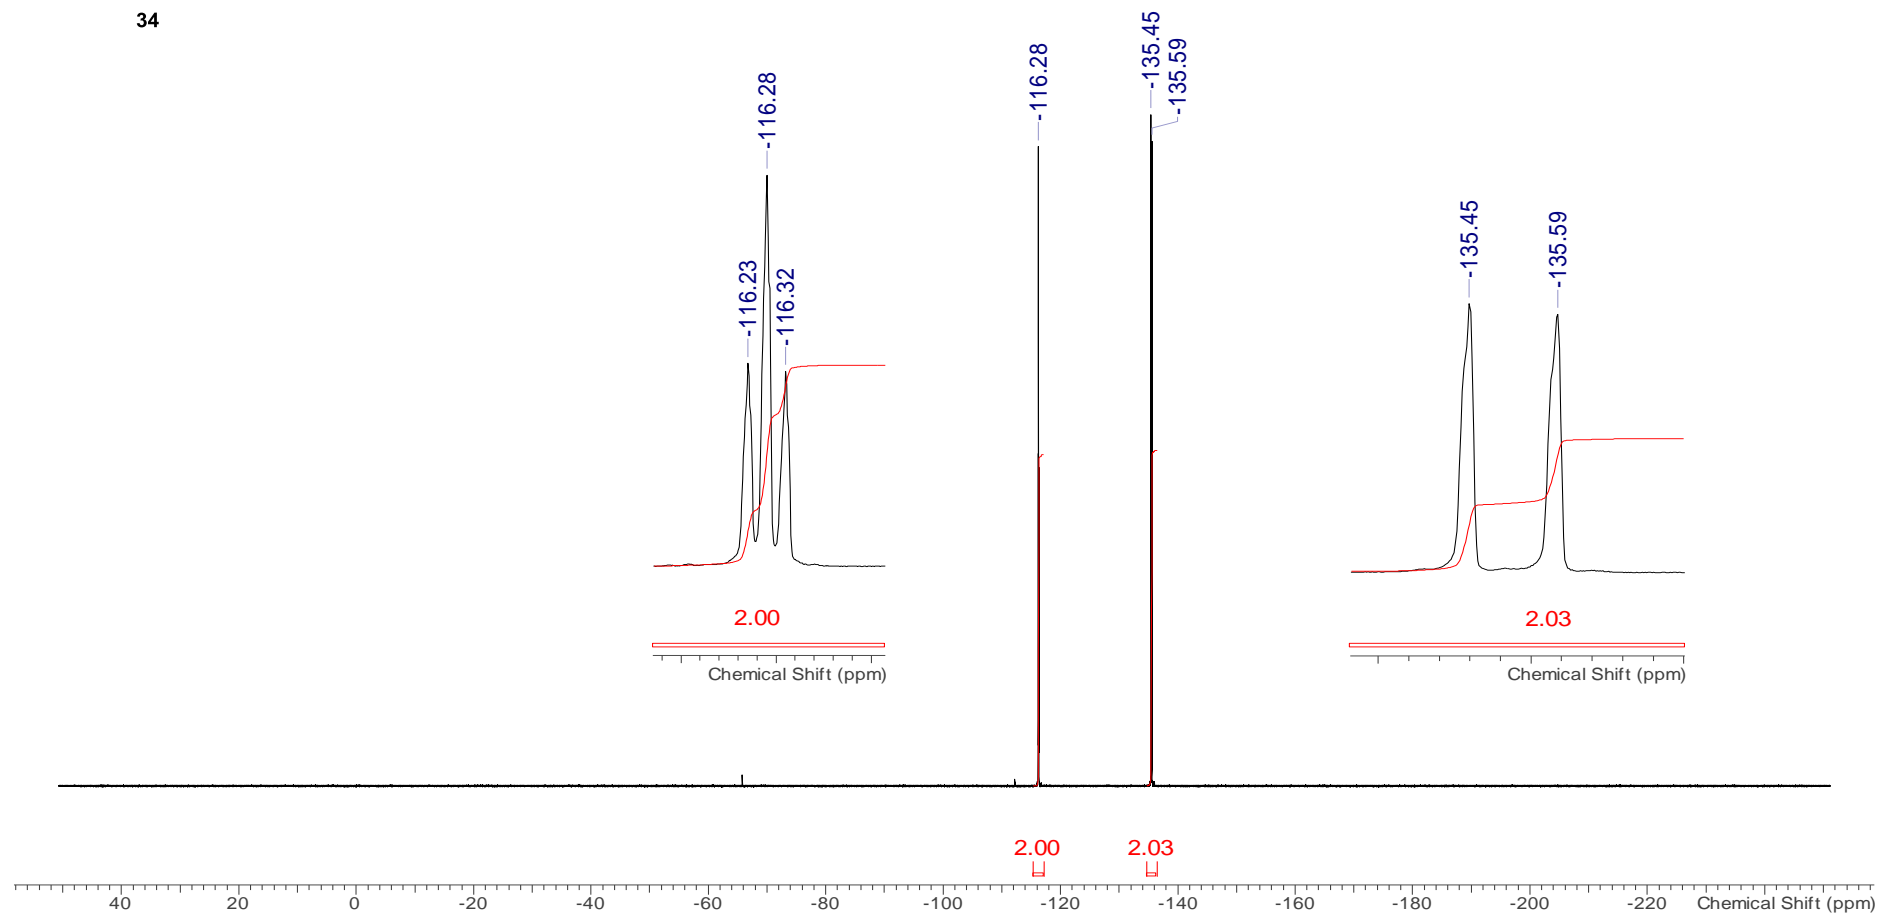

Supplement: ANIE-55-674-s001.pdf [file ANIE-55-674-s001.pdf]
